# Supplementary material
Source: publisher figshare collection journal article supplement (https://gsajournals.figshare.com/ndownloader/files/28002723)
Supplement: Supplementary file 1 [file 28002723]

## Sheet: Table S8
Table S.8 : Information on the 1492 genes identified by GWAS for virulence and/or host specificity in Botrytis cinerea. Gene.ID is the gene identification. Trait show whether the gene was identified for host specificity (spe) or virulence (vir) or both (SpeVir). N_SNPs proveide the number of SNPs taken in consideration within the gene or or 500bpup/downstream of the gene. Mean.Wald is the mean th…
				LM					BSLMM
				Host specificty		Virulence			Host specificity				Virulence
Num_ID	Gene.ID	Trait	N_SNPs	mean.Wald.spe	mean.effect.spe	mean.Wald.vir	mean.effect.vir		mean.alpha.spe	mean.beta.spe	mean.gamma.spe	mean.eff.spe	mean.alpha.vir	mean.beta.vir	mean.gamma.vir	mean.eff.vir		Genomic.Location..Gene.	Gene.Name.or.Symbol	Interpro.Description	PFam.Description	Smart.Description	Superfamily.Description	TigrFam.Description	Computed.GO.Components	Computed.GO.Functions	Computed.GO.Processes	EC.numbers.from.OrthoMCL
1	Bcin01g00380	Spe	19	0.647487	0.000405077	0.192366	0.0229515		1.06223e-06	0.0212708	3.17947e-05	2.09931e-06	-4.75161e-07	-0.00434795	1.22438e-05	1.84717e-07		bcin_chr_1:168,457..172,890(+)
2	Bcin01g00770	Vir	23	0.493332	0.00941748	0.332344	-0.0170965		6.53098e-07	0.00343915	1.21913e-05	1.3134e-07	-1.78619e-07	-0.000633054	2.77666e-05	1.04766e-06		bcin_chr_1:292,116..293,382(-)		Ribosomal protein L37e;Zinc-binding ribosomal protein;Ribosomal protein L37e, conserved site	Ribosomal protein L37e		Zinc-binding ribosomal protein		ribosome	metal ion binding;rRNA binding;structural constituent of ribosome	translation
3	Bcin01g00780	Vir	26	0.253162	-0.0118194	0.188322	0.00849513		-5.90226e-07	-0.00525414	1.29346e-05	2.17133e-07	-3.24094e-07	-0.00307026	1.9502e-05	6.03875e-07		bcin_chr_1:293,907..299,142(-)							integral component of membrane
4	Bcin01g00860	Vir	15	0.0628841	-0.0334277	0.0709417	0.0864879		-1.09457e-06	-0.010327	1.48267e-05	2.60941e-07	1.80949e-06	0.0217501	2.12912e-05	6.80024e-07		bcin_chr_1:322,836..324,443(+)		Kinetochore protein Sos7					NMS complex		protein localization to kinetochore
5	Bcin01g00870	Vir	10	0.0766117	-0.0162195	0.142122	0.0414445		-7.00381e-07	-0.00792951	2.083e-05	5.87489e-07	6.20752e-07	0.0100915	1.23895e-05	2.56874e-07		bcin_chr_1:328,103..331,797(+)		Major facilitator superfamily;MFS transporter superfamily	Major facilitator superfamily		MFS transporter superfamily		integral component of membrane	transmembrane transporter activity	transmembrane transport	3.2.1.14 (Chitinase)
6	Bcin01g01130	Vir	24	0.340537	-0.00923849	0.125641	0.00951867		-3.80886e-07	-0.00180225	1.36e-05	1.92919e-07	-6.83258e-07	-0.00273715	2.16009e-05	7.06051e-07		bcin_chr_1:458,698..460,227(+)
7	Bcin01g01200	Spe	20	0.243422	0.00361085	0.118148	0.0164155		1.46606e-06	0.0101166	2.294e-05	6.32081e-07	4.47772e-07	0.00316433	1.13e-05	2.33624e-07		bcin_chr_1:482,196..484,091(+)
8	Bcin01g01210	SpeVir	92	0.152024	-0.00651778	0.161715	0.0154046		-5.04423e-07	-0.000767216	4.13098e-05	2.08116e-06	6.50839e-07	0.00543236	1.40789e-05	3.2525e-07		bcin_chr_1:486,000..488,394(-)		Target SNARE coiled-coil homology domain;Syntaxin, N-terminal domain;SNARE	Syntaxin, N-terminal domain;Target SNARE coiled-coil homology domain		SNARE		integral component of membrane;membrane		vesicle-mediated transport
9	Bcin01g01220	Spe	116	0.0331286	0.0358334	0.050084	-0.0441651		3.50493e-06	0.0202302	7.13414e-05	4.11713e-06	-9.52619e-07	-0.00573362	1.06497e-05	1.24891e-07		bcin_chr_1:489,210..493,923(-)		NACHT nucleoside triphosphatase;Domain of unknown function DUF676, lipase-like;P-loop containing nucleoside triphosphate hydrolase;Alpha/Beta hydrolase fold	Domain of unknown function DUF676, lipase-like;NACHT nucleoside triphosphatase		P-loop containing nucleoside triphosphate hydrolase;Alpha/Beta hydrolase fold			protein binding		3.4.21.72 (IgA-specific serine endopeptidase)
10	Bcin01g01230	SpeVir	21	0.160189	0.0159077	0.143693	-0.0329214		4.75421e-07	0.00938719	0.000272271	1.77614e-05	-9.74629e-07	-0.00882284	2.39499e-05	8.37481e-07		bcin_chr_1:494,692..497,022(+)	Bctrm1	tRNA methyltransferase, Trm1;S-adenosyl-L-methionine-dependent methyltransferase	tRNA methyltransferase, Trm1		S-adenosyl-L-methionine-dependent methyltransferase			RNA binding;tRNA (guanine-N2-)-methyltransferase activity;tRNA binding	tRNA processing	2.1.1.216 (tRNA (guanine(26)-N(2))-dimethyltransferase)
11	Bcin01g01240	Spe	21	0.0734461	0.00731318	0.0763943	0.00577632		9.43644e-07	0.00780625	0.000119276	7.6356e-06	4.52019e-07	0.00501277	1.37895e-05	2.89299e-07		bcin_chr_1:502,805..504,065(+)
12	Bcin01g01250	SpeVir	26	0.206121	-0.00458987	0.21917	0.00985743		-4.41608e-07	-0.00324902	1.88769e-05	4.43153e-07	5.79005e-07	0.00594959	1.32227e-05	2.96298e-07		bcin_chr_1:506,501..507,664(+)
13	Bcin01g01280	SpeVir	36	0.0632229	0.0339052	0.183397	-0.0512456		2.53242e-06	0.0237481	5.29083e-05	2.18771e-06	-1.08856e-06	-0.010103	1.77135e-05	5.13386e-07		bcin_chr_1:510,320..514,323(+)		Domain of unknown function DUF676, lipase-like;Alpha/Beta hydrolase fold	Domain of unknown function DUF676, lipase-like		Alpha/Beta hydrolase fold					3.1.-.- (Acting on ester bonds.)
14	Bcin01g01330	Spe	13	0.280801	0.00355053	0.137656	-0.00793163		4.74077e-09	0.00154486	2.55846e-05	7.92465e-07	-1.75869e-07	-0.000652735	1.16842e-05	2.57104e-07		bcin_chr_1:531,083..532,463(+)
15	Bcin01g01380	SpeVir	34	0.0646635	-0.0377079	0.0333826	0.0934048		-9.58197e-07	-0.00920489	1.67765e-05	4.2064e-07	1.29312e-06	0.0203165	2.01981e-05	6.15683e-07		bcin_chr_1:545,117..546,553(-)		HpcH/HpaI aldolase/citrate lyase domain;Pyruvate/Phosphoenolpyruvate kinase-like domain superfamily	HpcH/HpaI aldolase/citrate lyase domain		Pyruvate/Phosphoenolpyruvate kinase-like domain superfamily			catalytic activity		4.1.2.- (Aldehyde-lyases.)
16	Bcin01g01390	SpeVir	11	0.315621	0.00461793	0.117234	-0.00650349		4.92836e-07	0.00606105	4.10273e-05	1.65515e-06	1.19811e-07	0.00542153	2.23732e-05	8.46859e-07		bcin_chr_1:546,716..549,308(+)		Zn(2)-C6 fungal-type DNA-binding domain;Transcription factor domain, fungi;Zn(2)-C6 fungal-type DNA-binding domain superfamily	Zn(2)-C6 fungal-type DNA-binding domain;Transcription factor domain, fungi	Zn(2)-C6 fungal-type DNA-binding domain;Transcription factor domain, fungi	Zn(2)-C6 fungal-type DNA-binding domain superfamily		host cell nucleus;nucleus	DNA binding;DNA-binding transcription factor activity, RNA polymerase II-specific;zinc ion binding	regulation of transcription, DNA-templated;transcription, DNA-templated	2.6.1.1 (Aspartate transaminase)
17	Bcin01g01400	Vir	9	0.0365047	-0.0182292	1.32003e-05	0.0677926		8.44992e-07	0.00782696	2.09778e-05	5.32012e-07	1.21862e-07	0.007409	3.64912e-05	1.99558e-06		bcin_chr_1:549,723..551,292(-)		Alpha/beta hydrolase fold-1;Alpha/Beta hydrolase fold	Alpha/beta hydrolase fold-1		Alpha/Beta hydrolase fold					3.4.11.5 (Prolyl aminopeptidase)
18	Bcin01g01410	Spe	16	0.0446592	-0.0425045	0.0459528	0.122177		-1.04402e-06	-0.0111328	1.39375e-05	2.27723e-07	2.43711e-06	0.053485	3.82171e-05	2.28263e-06		bcin_chr_1:551,392..553,482(+)	Bcaat2	Aspartate/other aminotransferase;Aminotransferases, class-I, pyridoxal-phosphate-binding site;Aminotransferase, class I/classII;Pyridoxal phosphate-dependent transferase	Aminotransferase, class I/classII		Pyridoxal phosphate-dependent transferase			L-aspartate:2-oxoglutarate aminotransferase activity;catalytic activity;pyridoxal phosphate binding;transaminase activity	biosynthetic process;cellular amino acid metabolic process	2.6.1.1 (Aspartate transaminase)
19	Bcin01g01440	Vir	7	0.0223346	-0.0409903	7.3627e-05	0.098391		-1.30232e-06	-0.0108954	1.46571e-05	1.8745e-07	1.62001e-06	0.0185165	1.75489e-05	3.98938e-07		bcin_chr_1:561,675..563,453(+)		TauD/TfdA-like domain	TauD/TfdA-like domain					oxidoreductase activity	oxidation-reduction process	1.14.11.- (With 2-oxoglutarate as one donor, and incorporation of one atom each of oxygen into both donors.)
20	Bcin01g01450	Vir	24	0.0219401	-0.0386261	0.00194458	0.0993603		-2.30469e-06	-0.0206541	2.21833e-05	7.19467e-07	2.52031e-06	0.0331186	3.32237e-05	1.57843e-06		bcin_chr_1:564,791..570,777(-)	BcatrO	ABC transporter-like;AAA+ ATPase domain;CDR ABC transporter;ABC-2 type transporter;ABC transporter, conserved site;P-loop containing nucleoside triphosphate hydrolase;ABC-transporter N-terminal domain;ATP-binding cassette transporter, PDR-like subfamily G, domain 1;ATP-binding cassette transporter, PDR-like subfamily G, domain 2	ABC transporter-like;ABC-2 type transporter;CDR ABC transporter;ABC-transporter N-terminal domain	AAA+ ATPase domain	P-loop containing nucleoside triphosphate hydrolase		integral component of membrane;membrane	ATP binding;ATPase activity;ATPase-coupled transmembrane transporter activity	transmembrane transport	3.6.3.28 (Transferred entry: 7.3.2.2)
21	Bcin01g01470	Vir	14	0.0302385	-0.0392753	0.0651638	0.0959141		-2.21196e-06	-0.0175093	1.87071e-05	4.29735e-07	2.64969e-06	0.0327562	3.03083e-05	1.29649e-06		bcin_chr_1:578,643..580,060(+)
22	Bcin01g01580	Spe	11	0.107206	-0.0104255	0.0650056	0.0185493		-3.1131e-07	-0.0037845	2.42545e-05	7.71517e-07	-1.44883e-07	-0.000482473	1.42584e-05	2.48185e-07		bcin_chr_1:612,847..614,534(+)		Peptidase S1, PA clan			Peptidase S1, PA clan
23	Bcin01g01640	Spe	33	0.0253572	-0.0220933	0.092471	0.0149263		-1.38116e-06	-0.0105311	7.60242e-05	3.66728e-06	-1.13466e-07	-0.00171407	1.1177e-05	1.14956e-07		bcin_chr_1:634,259..637,112(-)		Tetracycline resistance protein/drug resistance transporter;Major facilitator superfamily;MFS transporter superfamily	Major facilitator superfamily		MFS transporter superfamily		integral component of membrane	transmembrane transporter activity	transmembrane transport
24	Bcin01g01660	Spe	66	0.354043	0.00297415	0.150404	-0.000645905		1.72113e-08	-0.00104217	1.74773e-05	4.32438e-07	-4.89979e-07	-0.00185391	1.226e-05	2.02806e-07		bcin_chr_1:650,320..652,745(-)
25	Bcin01g01780	Vir	14	0.169945	0.00495696	0.101334	-0.0177118		1.80799e-07	0.000574425	2.005e-05	5.05692e-07	-5.70011e-07	-0.00593657	2.60451e-05	9.41777e-07		bcin_chr_1:692,313..693,771(+)		DNA-directed RNA polymerase III, subunit Rpc31	DNA-directed RNA polymerase III, subunit Rpc31				RNA polymerase III complex		transcription by RNA polymerase III
26	Bcin01g02030	Spe	6	0.499031	-0.0120368	0.00777218	0.0655766		4.12152e-07	0.00986203	2.97167e-05	1.18685e-06	1.09923e-06	0.0125803	1.42807e-05	2.50701e-07		bcin_chr_1:785,615..790,879(-)	Bcsrb8	Mediator complex, subunit Med12	Mediator complex, subunit Med12	Mediator complex, subunit Med12			mediator complex	transcription coregulator activity	regulation of transcription by RNA polymerase II
27	Bcin01g02040	Spe	4	0.434194	0.0170502	0.0148175	0.0336132		2.94594e-06	0.0289782	4.4425e-05	1.94858e-06	-1.74608e-07	-0.00147314	1.49211e-05	1.89665e-07		bcin_chr_1:790,931..792,177(+)		Uncharacterised protein family UPF0139	Uncharacterised protein family UPF0139				integral component of membrane
28	Bcin01g02060	Spe	4	0.0120749	0.011486	0.0171971	0.03377		2.15058e-06	0.0191871	6.87e-05	3.19405e-06	-7.53841e-07	-0.000430553	1.81842e-05	4.6926e-07		bcin_chr_1:794,352..795,795(-)		N-glycosylation protein EOS1	N-glycosylation protein EOS1				endoplasmic reticulum membrane;integral component of membrane		cellular response to oxidative stress
29	Bcin01g02090	Spe	3	0.538603	0.0214416	0.0819437	-0.00148101		1.58845e-06	0.0293472	5.36333e-05	2.64415e-06	-5.00853e-07	-0.0113596	1.47368e-05	3.79561e-07		bcin_chr_1:802,711..804,097(-)	Bcade1	Phosphoribosylaminoimidazole-succinocarboxamide synthase;SAICAR synthetase, conserved site;SAICAR synthetase/ADE2, N-terminal	SAICAR synthetase/ADE2, N-terminal			Phosphoribosylaminoimidazole-succinocarboxamide synthase		ATP binding;phosphoribosylaminoimidazolesuccinocarboxamide synthase activity	'de novo' IMP biosynthetic process;purine nucleotide biosynthetic process	6.3.2.6 (Phosphoribosylaminoimidazolesuccinocarboxamide synthase)
30	Bcin01g02100	Spe	3	0.169574	0.00856206	0.0340414	0.0155818		1.6183e-06	0.018767	3.59333e-05	1.46961e-06	-1.0958e-06	-0.00957633	1.52632e-05	2.98089e-07		bcin_chr_1:804,256..805,522(+)		Galactose-binding-like domain superfamily;NADH:ubiquinone oxidoreductase intermediate-associated protein 30;Complex I intermediate-associated protein 30, mitochondrial	NADH:ubiquinone oxidoreductase intermediate-associated protein 30		Galactose-binding-like domain superfamily				mitochondrial respiratory chain complex I assembly
31	Bcin01g02310	Spe	14	0.592435	0.00197971	0.0454641	0.0520313		2.03827e-06	0.0245788	3.98286e-05	1.81169e-06	-2.09487e-08	0.00078575	1.2015e-05	1.20663e-07		bcin_chr_1:874,106..877,542(+)	Bcpmt1	Glycosyl transferase family 39/83;MIR motif;Glycosyltransferase 39-like;Protein O-mannosyl-transferase, C-terminal four TM domain;Mir domain superfamily	Glycosyl transferase family 39/83;MIR motif;Protein O-mannosyl-transferase, C-terminal four TM domain	MIR motif	Mir domain superfamily		endoplasmic reticulum membrane;integral component of membrane;membrane	dolichyl-phosphate-mannose-protein mannosyltransferase activity;mannosyltransferase activity	protein O-linked glycosylation	2.4.1.109 (Dolichyl-phosphate-mannose--protein mannosyltransferase)
32	Bcin01g02330	Spe	12	0.542141	0.00131072	0.0652676	0.038336		1.67731e-06	0.0228002	4.33833e-05	2.22201e-06	1.4456e-07	0.00276294	1.27281e-05	1.66974e-07		bcin_chr_1:881,670..882,968(+)		Dienelactone hydrolase;Alpha/Beta hydrolase fold	Dienelactone hydrolase		Alpha/Beta hydrolase fold			hydrolase activity		3.1.-.- (Acting on ester bonds.)
33	Bcin01g02370	Spe	3	0.63259	-0.00552845	0.332322	0.0547012		1.31411e-06	0.0189826	9.5e-05	7.38681e-06	3.09216e-08	-0.00288566	1.02105e-05	1.38844e-07		bcin_chr_1:886,269..887,236(-)		PLAC8 motif-containing protein	PLAC8 motif-containing protein			PLAC8 motif-containing protein
34	Bcin01g02390	Spe	7	0.675534	0.00838649	0.00142263	0.0655676		3.01061e-06	0.0413912	5.21e-05	2.74266e-06	-5.05945e-07	-0.00397065	9.68421e-06	1.06746e-07		bcin_chr_1:890,924..892,984(+)		Major facilitator superfamily;MFS transporter superfamily	Major facilitator superfamily		MFS transporter superfamily		integral component of membrane	transmembrane transporter activity	transmembrane transport
35	Bcin01g02460	Spe	22	0.505795	0.0108432	0.128544	-0.000306346		1.50873e-06	0.0154066	2.84545e-05	1.11666e-06	8.23854e-08	-0.00167466	1.32871e-05	2.88967e-07		bcin_chr_1:910,955..912,454(+)		RlpA-like protein, double-psi beta-barrel domain;Expansin, cellulose-binding-like domain superfamily;RlpA-like domain superfamily	RlpA-like protein, double-psi beta-barrel domain		Expansin, cellulose-binding-like domain superfamily;RlpA-like domain superfamily
36	Bcin01g03560	Vir	13	0.556657	0.0121286	0.54192	-0.0321417		-7.10662e-08	-0.00136358	1.30231e-05	2.27576e-07	4.83653e-07	0.00335732	2.86721e-05	1.22363e-06		bcin_chr_1:1,277,670..1,278,575(-)		Ada DNA repair, metal-binding;DNA binding HTH domain, AraC-type;Ada-like domain superfamily	DNA binding HTH domain, AraC-type;Ada DNA repair, metal-binding		Ada-like domain superfamily			DNA binding;DNA-binding transcription factor activity;methyltransferase activity;sequence-specific DNA binding;zinc ion binding	DNA repair;regulation of transcription, DNA-templated	3.2.2.21 (DNA-3-methyladenine glycosylase II)
37	Bcin01g03650	Vir	8	0.290056	0.00687998	0.224464	-0.0205827		6.40351e-07	0.00484812	1.48875e-05	2.38732e-07	-1.3727e-06	-0.0158404	5.01842e-05	2.51535e-06		bcin_chr_1:1,307,808..1,311,308(+)	Bcpib1	FYVE zinc finger;Zinc finger, RING-type;Zinc finger, FYVE/PHD-type	FYVE zinc finger;Zinc finger, RING-type	FYVE zinc finger	Zinc finger, FYVE/PHD-type			metal ion binding		2.3.2.27 (RING-type E3 ubiquitin transferase)
38	Bcin01g03800	Vir	14	0.204804	-0.00164253	0.0781685	-0.00704906		-4.17428e-07	-0.0012936	1.87929e-05	4.79236e-07	1.48847e-08	-0.00553552	3.53233e-05	1.82562e-06		bcin_chr_1:1,367,830..1,368,581(+)							integral component of membrane
39	Bcin01g03810	Spe	12	0.230362	0.02561	0.163711	-0.0434093		1.67358e-06	0.0143222	1.9575e-05	4.05658e-07	-1.11856e-06	-0.0119692	1.61667e-05	3.84116e-07		bcin_chr_1:1,370,400..1,372,445(-)							integral component of membrane
40	Bcin01g03920	Vir	26	0.134986	-0.00904493	0.0864166	0.0256995		-6.22894e-07	-0.00604968	2.32346e-05	6.46009e-07	9.55755e-07	0.0117344	1.97045e-05	6.46029e-07		bcin_chr_1:1,448,158..1,450,147(-)
41	Bcin01g03990	Vir	36	0.333418	0.00876205	0.205038	-0.00996749		5.77196e-07	0.00341093	1.44778e-05	2.40693e-07	-1.61248e-07	-0.00221036	1.55994e-05	4.5014e-07		bcin_chr_1:1,469,473..1,470,824(-)		BTB/POZ domain;SKP1/BTB/POZ domain superfamily	BTB/POZ domain		SKP1/BTB/POZ domain superfamily			protein binding
42	Bcin01g04150	Vir	34	0.181581	-0.0160177	0.0222162	0.0537749		-7.23697e-07	-0.00497389	1.40971e-05	2.21763e-07	1.38684e-06	0.0155105	1.85666e-05	5.64476e-07		bcin_chr_1:1,513,672..1,516,094(+)
43	Bcin01g04180	Vir	38	0.245941	-0.0180042	0.00966731	0.0944431		-4.19658e-07	-0.00333756	1.22316e-05	1.45823e-07	2.04562e-06	0.0245302	2.10083e-05	7.03322e-07		bcin_chr_1:1,520,531..1,522,611(+)		Major facilitator superfamily;MFS transporter superfamily	Major facilitator superfamily		MFS transporter superfamily		integral component of membrane	transmembrane transporter activity	transmembrane transport
44	Bcin01g04210	Vir	24	0.438895	0.0112118	0.134094	0.00123961		1.11011e-06	0.00779598	1.49167e-05	2.39427e-07	-2.66247e-08	-0.00108471	1.27939e-05	2.75413e-07		bcin_chr_1:1,533,577..1,535,761(-)		Sugar/inositol transporter;Major facilitator, sugar transporter-like;Sugar transporter, conserved site;MFS transporter superfamily	Major facilitator, sugar transporter-like		MFS transporter superfamily	Sugar/inositol transporter	integral component of membrane;membrane	transmembrane transporter activity	transmembrane transport
45	Bcin01g04220	Vir	17	0.300309	-0.00255823	0.304948	0.00307426		-3.5379e-07	-0.00148887	1.47412e-05	2.67347e-07	6.96879e-08	-0.000368296	1.46316e-05	2.58217e-07		bcin_chr_1:1,535,939..1,538,410(+)		Sulfatase, N-terminal;Alkaline-phosphatase-like, core domain superfamily;Sulfatase, conserved site	Sulfatase, N-terminal		Alkaline-phosphatase-like, core domain superfamily			catalytic activity;sulfuric ester hydrolase activity		3.1.6.1 (Arylsulfatase (type I))
46	Bcin01g04240	Vir	13	0.33126	-0.000841347	0.21212	0.00825142		-2.46836e-07	0.000197927	1.16692e-05	1.48363e-07	8.68304e-07	0.00895973	2.11903e-05	6.56391e-07		bcin_chr_1:1,543,842..1,545,760(+)							integral component of membrane			3.8.1.2 ((S)-2-haloacid dehalogenase)
47	Bcin01g04290	Vir	11	0.291642	-0.00735607	0.102275	0.034113		1.6057e-07	0.0005564	1.33455e-05	2.09818e-07	6.1715e-07	0.00695386	1.87081e-05	5.39084e-07		bcin_chr_1:1,566,959..1,568,328(+)		Methyltransferase domain;Methyltransferase-like protein 24	Methyltransferase domain
48	Bcin01g04340	Vir	13	0.428493	-0.00814511	0.305294	0.0286557		2.99176e-07	0.00115807	1.09615e-05	1.45635e-07	3.32246e-07	0.00346005	1.51012e-05	3.66573e-07		bcin_chr_1:1,577,661..1,580,295(-)	Bcmet3	Sulphate adenylyltransferase;Adenylyl-sulfate kinase;PUA-like superfamily;Sulphate adenylyltransferase catalytic domain;ATP-sulfurylase PUA-like domain;P-loop containing nucleoside triphosphate hydrolase;Sulfate adenylyltransferase	Sulphate adenylyltransferase catalytic domain;ATP-sulfurylase PUA-like domain		P-loop containing nucleoside triphosphate hydrolase;PUA-like superfamily	Sulphate adenylyltransferase;Adenylyl-sulfate kinase	cytoplasm	ATP binding;adenylylsulfate kinase activity;sulfate adenylyltransferase (ATP) activity	cysteine biosynthetic process;hydrogen sulfide biosynthetic process;methionine biosynthetic process;sulfate assimilation;sulfur amino acid metabolic process	2.7.1.25 (Adenylyl-sulfate kinase)
49	Bcin01g04430	Vir	41	0.24543	-0.000342721	0.0179519	0.013477		4.62951e-07	0.00237114	1.07073e-05	1.03771e-07	2.46387e-07	0.00130725	1.52683e-05	3.35747e-07		bcin_chr_1:1,615,647..1,617,905(+)		Tetracycline resistance protein/drug resistance transporter;Sugar transporter, conserved site;Major facilitator superfamily;MFS transporter superfamily	Major facilitator superfamily		MFS transporter superfamily		integral component of membrane	transmembrane transporter activity	transmembrane transport
50	Bcin01g04480	Vir	12	0.228192	-0.00102279	0.162217	0.0032383		1.9865e-07	-1.49817e-05	1.29333e-05	1.89177e-07	-2.68029e-07	0.000889826	2.07982e-05	6.92373e-07		bcin_chr_1:1,634,854..1,637,053(+)							integral component of membrane
51	Bcin01g04520	Vir	13	0.221493	-0.00953905	0.312147	0.0259014		-6.84865e-07	-0.00560366	1.61308e-05	3.90177e-07	1.26189e-06	0.0123675	1.9004e-05	5.88464e-07		bcin_chr_1:1,648,469..1,649,906(-)							integral component of membrane
52	Bcin01g04640	Vir	9	0.110317	-0.0115752	0.00173108	0.0273645		-3.89261e-07	-0.00485857	2.46778e-05	7.13863e-07	4.13092e-07	0.00668594	2.2807e-05	7.37093e-07		bcin_chr_1:1,689,569..1,693,653(-)		Cyclin, C-terminal domain;Cyclin, N-terminal;Cyclin-like;Cyclin-like superfamily;Cyclin	Cyclin, N-terminal;Cyclin, C-terminal domain	Cyclin-like;Cyclin, C-terminal domain	Cyclin-like superfamily		host cell nucleus
53	Bcin01g04660	Vir	32	0.262728	-0.00428048	0.249721	0.0105927		-3.02219e-07	-0.0020172	1.21906e-05	1.63109e-07	2.16729e-07	0.00234513	1.60954e-05	4.05606e-07		bcin_chr_1:1,707,238..1,713,001(+)
54	Bcin01g04780	Spe	4	0.289059	0.0145342	0.231541	-0.0201736		4.58685e-07	0.000954191	1.5025e-05	3.00766e-07	-1.25308e-07	0.000198467	9.44737e-06	8.05898e-08		bcin_chr_1:1,741,442..1,742,940(+)
55	Bcin01g04840	Spe	19	0.441559	0.00764364	0.184066	0.00515264		9.49232e-07	0.0086307	1.86053e-05	6.76611e-07	-1.43197e-07	-0.000387192	1.23878e-05	1.66284e-07		bcin_chr_1:1,750,101..1,752,222(+)		Major facilitator superfamily;MFS transporter superfamily	Major facilitator superfamily		MFS transporter superfamily		integral component of membrane	transmembrane transporter activity	transmembrane transport
56	Bcin01g04850	SpeVir	19	0.197986	-0.0166811	0.313232	0.024901		-7.60338e-07	-0.0018429	2.45789e-05	9.50248e-07	4.23839e-07	0.00504183	2.01662e-05	7.14803e-07		bcin_chr_1:1,752,225..1,754,735(-)		FAD/NAD(P)-binding domain superfamily			FAD/NAD(P)-binding domain superfamily					1.-.-.- (Oxidoreductases.)
57	Bcin01g04860	Vir	22	0.284647	-0.0244802	0.4566	0.026651		-2.3449e-06	-0.0139107	1.71409e-05	3.22972e-07	1.40226e-06	0.0143824	1.72775e-05	4.88603e-07		bcin_chr_1:1,754,976..1,755,991(-)		Tautomerase, cis-CaaD-like	Tautomerase, cis-CaaD-like
58	Bcin01g04870	SpeVir	47	0.0976086	-0.0115252	0.27711	0.0113561		-7.58991e-07	-0.00143294	2.77064e-05	1.01941e-06	9.34289e-07	0.00834321	1.81142e-05	5.14717e-07		bcin_chr_1:1,757,737..1,759,730(-)		NADH:flavin oxidoreductase/NADH oxidase, N-terminal	NADH:flavin oxidoreductase/NADH oxidase, N-terminal					FMN binding;catalytic activity;oxidoreductase activity	oxidation-reduction process	1.-.-.- (Oxidoreductases.)
59	Bcin01g04880	Vir	20	0.0846933	-0.0326027	0.0405547	0.0945476		-3.75698e-07	-0.00355607	1.149e-05	1.09007e-07	8.63231e-07	0.0108731	1.33421e-05	2.06854e-07		bcin_chr_1:1,762,251..1,764,599(-)		Cytochrome P450;Cytochrome P450, E-class, group IV;Cytochrome P450 superfamily	Cytochrome P450		Cytochrome P450 superfamily			heme binding;iron ion binding;monooxygenase activity;oxidoreductase activity, acting on paired donors, with incorporation or reduction of molecular oxygen	oxidation-reduction process;pathogenesis	1.-.-.- (Oxidoreductases.)
60	Bcin01g04920	Spe	37	0.271741	-0.00608638	0.129954	0.0117048		2.53091e-07	0.00498559	3.92865e-05	1.58178e-06	-4.23171e-07	-0.00369008	1.59346e-05	3.5416e-07		bcin_chr_1:1,773,782..1,777,490(+)	Bcdtc1	Terpenoid cyclases/protein prenyltransferase alpha-alpha toroid;Ent-kaurene synthase, fungal			Terpenoid cyclases/protein prenyltransferase alpha-alpha toroid					5.5.1.13 (Ent-copalyl diphosphate synthase)
61	Bcin01g05560	Vir	12	0.195085	-0.0110881	0.0956682	0.0208503		-8.27151e-07	-0.00747486	1.80833e-05	3.95049e-07	1.08982e-06	0.0133324	3.99474e-05	2.35696e-06		bcin_chr_1:1,946,473..1,948,499(+)		PWI domain;PWI domain superfamily	PWI domain	PWI domain	PWI domain superfamily				mRNA processing
62	Bcin01g05570	Vir	2	0.0650112	-0.00432386	0.0955254	0.0360423		-3.87659e-07	-0.00323825	2.485e-05	4.56489e-07	2.38424e-06	0.0340611	0.000162	1.24704e-05		bcin_chr_1:1,948,705..1,949,855(+)		Chromatin modification-related protein Eaf6	Chromatin modification-related protein Eaf6				histone acetyltransferase complex		histone acetylation	2.3.1.48 (Histone acetyltransferase)
63	Bcin01g05610	Vir	7	0.351229	0.000108814	0.212442	0.0066051		-2.10241e-07	-0.000466602	1.27571e-05	1.34291e-07	1.10694e-06	0.0181474	4.66617e-05	2.81037e-06		bcin_chr_1:1,957,109..1,959,234(-)	Bcenv7	Protein kinase domain;Serine/threonine-protein kinase, active site;Protein kinase-like domain superfamily;Protein kinase, ATP binding site	Protein kinase domain	Protein kinase domain	Protein kinase-like domain superfamily			ATP binding;protein kinase activity;protein serine/threonine kinase activity	protein phosphorylation	2.7.11.1 (Non-specific serine/threonine protein kinase)
64	Bcin01g05700	Spe	16	0.412885	-0.004257	0.206735	0.0124335		3.63523e-07	0.00013259	1.84625e-05	4.76323e-07	-7.26791e-07	-0.00560947	1.29211e-05	2.55068e-07		bcin_chr_1:1,977,200..1,979,204(-)		RTA-like protein	RTA-like protein				integral component of membrane
65	Bcin01g05730	Vir	4	0.20553	-0.013879	0.154128	0.0240033		-1.12232e-06	-0.00669646	1.05e-05	1.94864e-07	1.2487e-06	0.0161517	3.64737e-05	1.91252e-06		bcin_chr_1:1,995,679..1,997,456(+)		Glycoside-hydrolase family GH114, TIM-barrel domain;Glycoside hydrolase superfamily	Glycoside-hydrolase family GH114, TIM-barrel domain		Glycoside hydrolase superfamily		integral component of membrane	catalytic activity;raffinose alpha-galactosidase activity		3.2.1.22 (Alpha-galactosidase)
66	Bcin01g05770	Vir	13	0.241512	-0.0176458	0.0831697	0.0394653		-5.27756e-07	-0.00210653	1.15385e-05	1.46751e-07	8.82603e-07	0.00641881	1.28178e-05	2.07426e-07		bcin_chr_1:2,012,073..2,013,516(-)		Alpha/beta hydrolase fold-3;Alpha/Beta hydrolase fold	Alpha/beta hydrolase fold-3		Alpha/Beta hydrolase fold			hydrolase activity		3.1.1.2 (Arylesterase)
67	Bcin01g05780	Vir	11	0.41858	0.00575827	0.258129	-0.00327534		1.71571e-08	0.000731033	1.05818e-05	1.14781e-07	1.65422e-07	0.00296279	1.86986e-05	5.36331e-07		bcin_chr_1:2,015,936..2,019,623(+)		Myc-type, basic helix-loop-helix (bHLH) domain;Sterol regulatory element-binding protein 1, C-terminal;Helix-loop-helix DNA-binding domain superfamily	Myc-type, basic helix-loop-helix (bHLH) domain;Sterol regulatory element-binding protein 1, C-terminal	Myc-type, basic helix-loop-helix (bHLH) domain	Helix-loop-helix DNA-binding domain superfamily			protein dimerization activity	SREBP signaling pathway;positive regulation of transcription by RNA polymerase II
68	Bcin01g05910	Spe	43	0.196692	0.0197064	0.206606	-0.0249912		1.67423e-06	0.0141171	1.88744e-05	4.79501e-07	-8.26251e-07	-0.0069615	1.26977e-05	2.09791e-07		bcin_chr_1:2,066,339..2,068,428(-)
69	Bcin01g07240	Spe	7	0.527178	-0.00194491	0.414479	0.00690929		-6.43905e-07	-0.00340313	1.27143e-05	1.48621e-07	1.00045e-06	0.0106838	1.7218e-05	3.90052e-07		bcin_chr_1:2,528,288..2,529,763(-)	Bchgh1	Protein HGH1 N-terminal;Protein HGH1 C-terminal;Armadillo-type fold;Protein Hgh1	Protein HGH1 N-terminal;Protein HGH1 C-terminal		Armadillo-type fold					2.3.2.31 (RBR-type E3 ubiquitin transferase)
70	Bcin01g07260	Spe	25	0.345928	0.00827132	0.190519	-0.00907311		5.58592e-07	0.0101678	2.724e-05	9.60358e-07	-4.42736e-07	-0.0056785	1.71411e-05	4.99912e-07		bcin_chr_1:2,532,368..2,534,621(+)		Glycoside hydrolase, family 43;Concanavalin A-like lectin/glucanase domain superfamily;Glycosyl hydrolase, five-bladed beta-propellor domain superfamily;Beta-xylosidase, C-terminal Concanavalin A-like domain	Glycoside hydrolase, family 43;Beta-xylosidase, C-terminal Concanavalin A-like domain		Concanavalin A-like lectin/glucanase domain superfamily;Glycosyl hydrolase, five-bladed beta-propellor domain superfamily			hydrolase activity, hydrolyzing O-glycosyl compounds	carbohydrate metabolic process	3.2.1.37 (Xylan 1,4-beta-xylosidase)
71	Bcin01g07490	SpeVur	6	0.330908	0.00948652	0.232221	-0.0192753		1.69986e-06	0.00861201	1.87667e-05	3.69036e-07	-3.0735e-06	-0.0308553	8.49474e-05	4.54054e-06		bcin_chr_1:2,609,189..2,610,767(+)		Ribosomal protein L50, mitochondria	Ribosomal protein L50, mitochondria				mitochondrion;ribosome
72	Bcin01g08000	Vir	16	0.238726	-0.0127517	0.0373795	0.0543909		8.49229e-07	0.00887896	2.15625e-05	7.1108e-07	-3.16756e-07	-0.00308636	2.49605e-05	1.0017e-06		bcin_chr_1:2,804,475..2,805,987(-)		Metallo-beta-lactamase;Ribonuclease Z/Hydroxyacylglutathione hydrolase-like	Metallo-beta-lactamase	Metallo-beta-lactamase	Ribonuclease Z/Hydroxyacylglutathione hydrolase-like					3.-.-.- (Hydrolases.)
73	Bcin01g08020	Vir	10	0.100935	0.0309087	0.0419636	-0.0587718		3.06806e-06	0.0278667	3.377e-05	1.2321e-06	-3.03474e-06	-0.0366451	5.34316e-05	2.88257e-06		bcin_chr_1:2,807,893..2,809,473(+)		D-isomer specific 2-hydroxyacid dehydrogenase, NAD-binding domain;D-isomer specific 2-hydroxyacid dehydrogenase, NAD-binding domain conserved site 1;NAD(P)-binding domain superfamily	D-isomer specific 2-hydroxyacid dehydrogenase, NAD-binding domain		NAD(P)-binding domain superfamily			NAD binding	oxidation-reduction process	1.1.1.79 (Glyoxylate reductase (NADP(+)))
74	Bcin01g08050	Vir	6	0.0261535	0.0157643	0.000507697	-0.0235556		2.16868e-06	0.0171496	2.66667e-05	8.66436e-07	-2.70237e-06	-0.03219	6.13509e-05	3.50665e-06		bcin_chr_1:2,814,537..2,816,594(+)	Bcass1	Argininosuccinate synthase;Argininosuccinate synthase, conserved site;Argininosuccinate synthase, type 1 subfamily;Argininosuccinate synthetase, catalytic/multimerisation domain body	Argininosuccinate synthase		Argininosuccinate synthetase, catalytic/multimerisation domain body	Argininosuccinate synthase		ATP binding;argininosuccinate synthase activity	arginine biosynthetic process	6.3.4.5 (Argininosuccinate synthase)
75	Bcin01g08430	Spe	6	0.111653	-0.00145404	0.24683	0.00712073		3.82399e-07	0.00441232	3.485e-05	1.1495e-06	-1.16078e-07	0.00260515	1.39474e-05	1.7584e-07		bcin_chr_1:2,943,472..2,946,590(-)		ENTH/VHS;AP180 N-terminal homology (ANTH) domain;ENTH domain	AP180 N-terminal homology (ANTH) domain	ENTH domain	ENTH/VHS		clathrin-coated vesicle	1-phosphatidylinositol binding;clathrin binding;phospholipid binding	clathrin coat assembly	3.6.4.13 (RNA helicase)
76	Bcin01g08440	Spe	16	0.0280761	-0.0361746	0.150712	0.0645508		-1.7518e-06	-0.0133719	2.53875e-05	7.96972e-07	1.23572e-06	0.0127637	1.36908e-05	2.52676e-07		bcin_chr_1:2,947,899..2,950,632(+)	Bcmsd1	Aspartyl/Asparaginyl-tRNA synthetase, class IIb;Aminoacyl-tRNA synthetase, class II (D/K/N);Aspartate-tRNA ligase, type 1;Nucleic acid-binding, OB-fold	Aminoacyl-tRNA synthetase, class II (D/K/N)		Nucleic acid-binding, OB-fold		cytoplasm	ATP binding;aminoacyl-tRNA ligase activity;ligase activity;nucleotide binding	tRNA aminoacylation for protein translation	6.1.1.23 (Aspartate--tRNA(Asn) ligase)
77	Bcin01g08450	Spe	11	0.1172	-0.00632129	0.265474	0.00816286		-1.61736e-07	0.000141639	3.37909e-05	1.2631e-06	-5.71265e-08	0.000112198	1.34067e-05	2.8072e-07		bcin_chr_1:2,951,224..2,953,335(-)
78	Bcin01g08460	Spe	5	0.106292	0.0416482	0.313955	-0.0518429		2.26937e-06	0.0254176	0.00043926	2.78775e-05	-1.29861e-06	-0.013965	2.28e-05	5.86973e-07		bcin_chr_1:2,956,031..2,957,238(+)		Serine hydrolase FSH;Alpha/Beta hydrolase fold	Serine hydrolase FSH		Alpha/Beta hydrolase fold					3.1.2.- (Thiolester hydrolases.)
79	Bcin01g08480	Spe	8	0.201876	-0.0113759	0.290275	0.0191286		8.94852e-08	0.00126593	2.26625e-05	8.14899e-07	-5.28879e-07	-0.00226479	1.31842e-05	2.2057e-07		bcin_chr_1:2,958,156..2,960,500(+)		AMP-dependent synthetase/ligase;AMP-binding enzyme, C-terminal domain	AMP-dependent synthetase/ligase;AMP-binding enzyme, C-terminal domain					catalytic activity		6.2.1.3 (Long-chain-fatty-acid--CoA ligase)
80	Bcin01g08810	Vir	50	0.15535	0.00125371	0.357454	0.00830319		2.70953e-07	0.00153465	2.869e-05	9.0147e-07	5.30238e-08	0.00193318	2.05768e-05	6.63932e-07		bcin_chr_1:3,059,757..3,062,949(-)		Heterokaryon incompatibility	Heterokaryon incompatibility
81	Bcin01g09000	SpeVir	26	0.0683175	0.0100076	0.0290508	-0.0100794		1.61497e-06	0.0144802	4.09731e-05	1.69968e-06	-1.38327e-06	-0.0133485	5.65263e-05	2.87935e-06		bcin_chr_1:3,135,106..3,138,310(+)		Arsenical pump membrane protein, ArsB	Arsenical pump membrane protein, ArsB				integral component of membrane;plasma membrane	arsenite transmembrane transporter activity	arsenite transport
82	Bcin01g09020	Vir	17	0.243722	-0.0167233	0.166115	0.0528724		-3.42365e-07	-0.00244244	1.44471e-05	2.07344e-07	1.7678e-06	0.0213452	3.75356e-05	2.0209e-06		bcin_chr_1:3,141,219..3,143,338(-)		Tannase/feruloyl esterase;Alpha/Beta hydrolase fold	Tannase/feruloyl esterase		Alpha/Beta hydrolase fold			carboxylic ester hydrolase activity;metal ion binding		3.1.1.- (Carboxylic ester hydrolases.)
83	Bcin01g09060	Vir	3	0.0168674	-0.0392732	0.000163964	0.0859338		-2.12416e-06	-0.0180076	2.3e-05	5.26123e-07	2.18457e-06	0.020445	1.78246e-05	4.77839e-07		bcin_chr_1:3,155,950..3,158,140(+)		Domain of unknown function DUF3835;Prefoldin-like	Domain of unknown function DUF3835;Prefoldin-like
84	Bcin01g09070	Vir	46	0.0100718	-0.0461108	1.50615e-05	0.108319		-1.72958e-06	-0.0168639	1.55196e-05	3.33604e-07	2.52564e-06	0.0367857	3.5881e-05	1.75522e-06		bcin_chr_1:3,160,678..3,164,927(-)		F-box-like domain superfamily			F-box-like domain superfamily			protein binding
85	Bcin01g09080	Vir	15	0.0924689	-0.0266981	0.0108383	0.0806511		-9.05255e-07	-0.00875744	1.36067e-05	2.34473e-07	1.68377e-06	0.0221811	2.5586e-05	8.8921e-07		bcin_chr_1:3,164,951..3,167,983(-)	Bccsc1	Calcium-dependent channel, 7TM region, putative phosphate;10TM putative phosphate transporter, cytosolic domain;Calcium permeable stress-gated cation channel 1, N-terminal transmembrane domain	Calcium-dependent channel, 7TM region, putative phosphate;Calcium permeable stress-gated cation channel 1, N-terminal transmembrane domain;10TM putative phosphate transporter, cytosolic domain				integral component of membrane;membrane		ion transport	2.3.2.27 (RING-type E3 ubiquitin transferase)
86	Bcin01g09090	Vir	20	0.0476106	-0.0368497	5.23567e-05	0.0989707		-1.99487e-06	-0.0174282	1.671e-05	3.54449e-07	3.02393e-06	0.0395506	4.41053e-05	2.29672e-06		bcin_chr_1:3,168,172..3,171,204(+)		AAA+ ATPase domain;ATPase, AAA-type, core;P-loop containing nucleoside triphosphate hydrolase	ATPase, AAA-type, core	AAA+ ATPase domain	P-loop containing nucleoside triphosphate hydrolase			ATP binding		3.6.4.6 (Vesicle-fusing ATPase)
87	Bcin01g09100	Vir	21	0.156744	-0.0125027	0.228427	0.032951		-9.98711e-07	-0.00895408	2.14286e-05	5.49866e-07	1.48939e-06	0.016614	3.0817e-05	1.33243e-06		bcin_chr_1:3,175,092..3,179,780(+)		Glycosyl transferase, family 20;Trehalose-phosphatase;HAD-superfamily hydrolase, subfamily IIB;HAD-like superfamily	Glycosyl transferase, family 20;Trehalose-phosphatase		HAD-like superfamily	Trehalose-phosphatase;HAD-superfamily hydrolase, subfamily IIB		catalytic activity	trehalose biosynthetic process	2.4.1.15 (Alpha,alpha-trehalose-phosphate synthase (UDP-forming))
88	Bcin01g09110	Vir	7	0.0240507	-0.0222848	0.040403	0.0688226		-1.61468e-06	-0.0125128	2.45429e-05	6.69441e-07	2.75347e-06	0.0381036	6.25865e-05	3.66645e-06		bcin_chr_1:3,179,809..3,182,630(-)
89	Bcin01g09120	Vir	11	0.404238	0.00442552	0.126661	0.0175391		5.92032e-07	0.00320045	1.15636e-05	1.44583e-07	3.83183e-07	0.00446729	1.6823e-05	4.10515e-07		bcin_chr_1:3,183,510..3,185,358(+)	Bcpre10	Proteasome alpha-subunit, N-terminal domain;Proteasome, subunit alpha/beta;Nucleophile aminohydrolases, N-terminal;Proteasome subunit alpha 3	Proteasome, subunit alpha/beta;Proteasome alpha-subunit, N-terminal domain	Proteasome alpha-subunit, N-terminal domain	Nucleophile aminohydrolases, N-terminal		cytoplasm;nucleus;proteasome core complex;proteasome core complex, alpha-subunit complex	threonine-type endopeptidase activity	proteolysis involved in cellular protein catabolic process;ubiquitin-dependent protein catabolic process	3.4.25.1 (Proteasome endopeptidase complex)
90	Bcin01g09180	Vir	9	0.158147	-0.0296568	0.200053	0.0646656		-1.53338e-06	-0.0130622	1.52889e-05	2.70924e-07	2.06492e-06	0.0210155	2.97661e-05	1.64656e-06		bcin_chr_1:3,198,701..3,200,177(+)		Cysteine-rich secretory protein-related;CAP domain;Allergen V5/Tpx-1-related, conserved site;Pry1-like, SCP domain;CAP superfamily	CAP domain	CAP domain	CAP superfamily		extracellular region			3.1.3.16 (Protein-serine/threonine phosphatase)
91	Bcin01g09720	Spe	28	0.365908	-0.00472365	0.162516	-0.00119439		-2.8756e-07	-0.00171363	1.10893e-05	1.20209e-07	-1.99828e-07	-0.00185569	1.22932e-05	1.78716e-07		bcin_chr_1:3,378,234..3,381,805(-)		L-gulonolactone/D-arabinono-1,4-lactone oxidase;EF-Hand 1, calcium-binding site;FAD-binding, type PCMH-like superfamily			FAD-binding, type PCMH-like superfamily			FAD binding;flavin adenine dinucleotide binding;oxidoreductase activity, acting on the CH-OH group of donors, oxygen as acceptor	oxidation-reduction process
92	Bcin01g10020	Vir	13	0.295429	0.00284868	0.192959	0.0115815		-5.22641e-07	-0.000577906	2.30923e-05	6.49137e-07	2.15095e-06	0.0235253	9.74737e-05	5.70539e-06		bcin_chr_1:3,498,623..3,501,521(-)		Heterokaryon incompatibility	Heterokaryon incompatibility
93	Bcin01g10030	Vir	21	0.302826	-0.0199729	0.298461	0.0419744		-1.42378e-06	-0.00901045	1.39762e-05	2.27166e-07	1.07756e-06	0.0112894	1.4812e-05	3.51933e-07		bcin_chr_1:3,501,654..3,503,023(-)
94	Bcin01g10040	Vir	19	0.351867	-0.00336162	0.407519	-0.00088845		-4.9965e-07	-0.00351667	1.97e-05	4.78201e-07	-1.88339e-07	-0.000452255	2.18116e-05	7.49256e-07		bcin_chr_1:3,506,465..3,509,978(-)		F-box domain;Domain of unknown function DUF3506;F-box only protein 31;F-box-like domain superfamily	Domain of unknown function DUF3506;F-box domain	F-box domain	F-box-like domain superfamily		SCF ubiquitin ligase complex	cyclin binding;protein binding	SCF-dependent proteasomal ubiquitin-dependent protein catabolic process;cellular response to DNA damage stimulus;mitotic G1 DNA damage checkpoint;protein ubiquitination
95	Bcin01g10050	Vir	12	0.304951	0.00117161	0.210084	0.00416485		2.87249e-07	0.00570355	2.75e-05	1.02367e-06	-8.6786e-08	-0.00281387	4.79474e-05	2.67127e-06		bcin_chr_1:3,512,120..3,516,010(-)	Bcspt5	NGN domain;KOW;Translation protein SH3-like domain superfamily;Transcription elongation factor Spt5, eukaryote;Spt5 transcription elongation factor, N-terminal;Spt5 C-terminal domain;NGN domain, eukaryotic;Transcription elongation factor SPT5;Spt5, KOW domain repeat 1;Spt5, KOW domain repeat 2;Spt5, KOW domain repeat 3;Spt5, KOW domain repeat 4;Spt5, KOW domain repeat 5	NGN domain;Spt5 transcription elongation factor, N-terminal	KOW;Spt5 C-terminal domain	Translation protein SH3-like domain superfamily		nucleus	protein binding	regulation of DNA-templated transcription, elongation;regulation of transcription by RNA polymerase II;regulation of transcription, DNA-templated	3.4.21.10 (Acrosin)
96	Bcin01g10080	Vir	5	0.0062713	0.0485248	7.20445e-05	-0.0978707		3.6149e-06	0.0447065	5.878e-05	2.78579e-06	-3.86813e-06	-0.0642269	8.99789e-05	6.33668e-06		bcin_chr_1:3,522,571..3,525,092(+)		F-box domain	F-box domain					protein binding
97	Bcin01g10110	Vir	2	0.00790458	0.0471416	0.000117572	-0.0950688		3.33783e-06	0.0350734	4.855e-05	1.94827e-06	-3.683e-06	-0.0566618	6.55263e-05	4.0794e-06		bcin_chr_1:3,532,061..3,533,205(+)		Protein of unknown function DUF1748, fungi	Protein of unknown function DUF1748, fungi
98	Bcin01g10130	Vir	26	0.134504	0.0284193	0.167923	-0.0602988		1.8486e-06	0.0203057	3.22308e-05	1.19484e-06	-1.93624e-06	-0.0249298	4.01093e-05	2.1422e-06		bcin_chr_1:3,535,852..3,538,316(-)	Bcdug2	ArgE/DapE/ACY1/CPG2/YscS, conserved site;Peptidase M20;Peptidase M20, dimerisation domain	Peptidase M20;Peptidase M20, dimerisation domain				extracellular region	hydrolase activity;peptidase activity		3.4.13.20 (Beta-Ala-His dipeptidase)
99	Bcin01g10160	Vir	30	0.386288	0.0132298	0.142231	0.00295013		1.47814e-06	0.0113174	1.674e-05	3.75095e-07	-2.28559e-07	-0.000612116	1.71228e-05	5.30129e-07		bcin_chr_1:3,546,231..3,548,924(+)		Aromatic amino acid lyase;Phenylalanine ammonia-lyase;L-Aspartase-like;Phenylalanine/histidine ammonia-lyases, active site	Aromatic amino acid lyase		L-Aspartase-like	Phenylalanine ammonia-lyase	cytoplasm	ammonia-lyase activity;catalytic activity	L-phenylalanine catabolic process	4.3.1.24 (Phenylalanine ammonia-lyase)
100	Bcin01g10430	Vir	36	0.522914	0.00412827	0.152329	0.00747824		4.47763e-07	0.00282855	1.07083e-05	1.15352e-07	1.38008e-07	0.00262593	1.15351e-05	1.88851e-07		bcin_chr_1:3,631,302..3,633,069(+)		Alpha/beta hydrolase fold-1;Peptidase S33;Proline-specific peptidase;Alpha/Beta hydrolase fold	Alpha/beta hydrolase fold-1		Alpha/Beta hydrolase fold	Proline-specific peptidase		peptidase activity	proteolysis	3.4.11.5 (Prolyl aminopeptidase)
101	Bcin01g10680	Spe	11	0.230336	-0.0105328	0.174346	0.0196453		-1.50785e-07	0.000801249	4.66e-05	2.58618e-06	-3.15925e-07	-0.00484913	1.38182e-05	3.34941e-07		bcin_chr_1:3,716,272..3,718,683(+)		Major facilitator superfamily;MFS transporter superfamily	Major facilitator superfamily		MFS transporter superfamily		integral component of membrane	transmembrane transporter activity	transmembrane transport
102	Bcin01g11390	Vir	10	0.449779	-0.0129764	0.175206	0.0186385		4.17637e-07	0.0023424	1.127e-05	9.3899e-08	-2.05988e-06	-0.0191451	2.95789e-05	1.21225e-06		bcin_chr_1:3,991,272..3,993,109(+)		Carboxylesterase, type B;Carboxylesterase type B, active site;Alpha/Beta hydrolase fold	Carboxylesterase, type B		Alpha/Beta hydrolase fold			hydrolase activity		3.1.1.- (Carboxylic ester hydrolases.)
103	Bcin01g11400	Vir	17	0.544172	-0.00643562	0.222916	-0.00548603		7.59214e-08	-0.00122042	1.10412e-05	1.32873e-07	-1.49173e-06	-0.0131138	4.4904e-05	2.10179e-06		bcin_chr_1:3,994,224..3,995,566(+)
104	Bcin02g00003	Spe	1	0.00703128	0.0451459	0.184883	-0.0317844		5.0533e-06	0.0218963	3.58e-05	8.81694e-07	-1.94453e-07	-0.00598323	7.57895e-06	6.06871e-08		bcin_chr_2:13,253..14,526(+)
105	Bcin02g00004	Spe	3	0.0426373	0.037223	0.459101	-0.0211332		5.28824e-06	0.0223699	6.47333e-05	2.24012e-06	-2.84146e-06	-0.0186856	3.34737e-05	1.11464e-06		bcin_chr_2:17,015..17,919(+)
106	Bcin02g00005	Spe	20	0.14438	0.0309202	0.313122	-0.0264528		3.54836e-06	0.014497	2.653e-05	7.40691e-07	-2.38227e-06	-0.0121932	1.33e-05	2.95405e-07		bcin_chr_2:17,874..21,402(-)
107	Bcin02g01070	Vir	5	0.00927519	-0.0477062	0.000881563	0.0928626		-2.38782e-06	-0.0257309	2.114e-05	6.03543e-07	2.8048e-06	0.044007	5.61895e-05	3.62198e-06		bcin_chr_2:461,101..464,506(+)	Bcrot2	Glycoside hydrolase family 31;Galactose mutarotase-like domain superfamily;Glycoside hydrolase superfamily;Glycoside hydrolase family 31, N-terminal domain;Glycosyl hydrolases family 31, active site;Domain of unknown function DUF5110	Glycoside hydrolase family 31;Glycoside hydrolase family 31, N-terminal domain;Domain of unknown function DUF5110		Glycoside hydrolase superfamily;Galactose mutarotase-like domain superfamily			carbohydrate binding;catalytic activity;hydrolase activity, hydrolyzing O-glycosyl compounds	carbohydrate metabolic process	3.2.1.84 (Glucan 1,3-alpha-glucosidase)
108	Bcin02g01080	Spe	9	0.0100631	-0.0354774	0.000947112	0.0746264		-1.0438e-06	-0.0143416	2.77222e-05	9.75004e-07	1.08533e-06	0.0212143	2.13801e-05	7.04544e-07		bcin_chr_2:464,502..466,626(-)		Gated mechanosensitive channel;Large-conductance mechanosensitive channel/anditomin synthesis protein L	Large-conductance mechanosensitive channel/anditomin synthesis protein L		Gated mechanosensitive channel		integral component of membrane
109	Bcin02g01160	Spe	18	0.354829	0.00278419	0.13119	0.002774		7.92866e-08	0.0010365	1.67222e-05	3.86531e-07	3.49607e-07	0.00275268	1.25497e-05	2.72798e-07		bcin_chr_2:483,810..487,177(-)	Bcrlf2	Chromatin assembly factor 1 subunit A	Chromatin assembly factor 1 subunit A				nucleus			3.4.24.13 (IgA-specific metalloendopeptidase)
110	Bcin02g01170	Spe	3	0.306664	-0.0290009	0.00391933	0.0880724		-5.87471e-07	-0.00554106	1.63e-05	3.25422e-07	8.83489e-07	0.0136128	1.41404e-05	2.52625e-07		bcin_chr_2:489,068..491,581(-)
111	Bcin02g01180	Spe	14	0.261656	0.0127826	0.270412	-0.03222		-5.78734e-08	0.00332834	4.01214e-05	1.55422e-06	1.1218e-07	-0.00163706	1.40451e-05	3.04547e-07		bcin_chr_2:498,263..498,904(-)
112	Bcin02g01420	Spe	22	0.127617	-0.00909872	0.0415627	0.0259629		1.83313e-07	0.00640652	3.79545e-05	1.64479e-06	2.17607e-07	0.00171317	1.41914e-05	3.0956e-07		bcin_chr_2:571,961..575,124(+)		Glycosyl hydrolase, family 13, catalytic domain;Alpha-amylase-like;Alpha-amylase, domain of unknown function DUF1966, C-terminal;Glycoside hydrolase superfamily	Glycosyl hydrolase, family 13, catalytic domain;Alpha-amylase, domain of unknown function DUF1966, C-terminal	Glycosyl hydrolase, family 13, catalytic domain	Glycoside hydrolase superfamily			alpha-amylase activity;alpha-amylase activity (releasing maltohexaose);calcium ion binding;catalytic activity	carbohydrate catabolic process;carbohydrate metabolic process	3.2.1.1 (Alpha-amylase)
113	Bcin02g01460	Spe	71	0.278408	0.0152291	0.151186	-0.0128399		1.08594e-06	0.0124491	3.02915e-05	1.07551e-06	-5.65489e-07	-0.00556791	1.36575e-05	2.68976e-07		bcin_chr_2:582,025..584,332(+)	Bchfa1	Biotin/lipoyl attachment;Carbamoyl-phosphate synthetase large subunit-like, ATP-binding domain;Biotin carboxylase-like, N-terminal domain;Biotin carboxylase, C-terminal;Single hybrid motif;Rudiment single hybrid motif;Pre-ATP-grasp domain superfamily	Biotin carboxylase-like, N-terminal domain;Biotin/lipoyl attachment;Biotin carboxylase, C-terminal;Carbamoyl-phosphate synthetase large subunit-like, ATP-binding domain	Biotin carboxylase, C-terminal	Single hybrid motif;Rudiment single hybrid motif;Pre-ATP-grasp domain superfamily			ATP binding;ligase activity;metal ion binding		6.4.1.1 (Pyruvate carboxylase)
114	Bcin02g01470	Spe	127	0.264832	0.0253014	0.0633633	0.0270965		3.7184e-06	0.0432418	6.12323e-05	2.921e-06	-9.54592e-07	-0.00960405	1.43821e-05	3.274e-07		bcin_chr_2:585,860..590,753(+)		Ankyrin repeat;Ankyrin repeat-containing domain;Ankyrin repeat-containing domain superfamily	Ankyrin repeat-containing domain	Ankyrin repeat	Ankyrin repeat-containing domain superfamily		integral component of membrane	protein binding
115	Bcin02g01540	Spe	13	0.369335	0.00848039	0.0314743	-0.0350659		1.51342e-06	0.0122023	1.93846e-05	4.46819e-07	-1.39755e-06	-0.0127823	1.5749e-05	3.06616e-07		bcin_chr_2:606,800..609,400(+)	BccnA	Calcineurin-like phosphoesterase domain, ApaH type;Serine/threonine-specific protein phosphatase/bis(5-nucleosyl)-tetraphosphatase;PP2B, metallophosphatase domain;PP2B	Calcineurin-like phosphoesterase domain, ApaH type	Serine/threonine-specific protein phosphatase/bis(5-nucleosyl)-tetraphosphatase				calmodulin binding;calmodulin-dependent protein phosphatase activity;hydrolase activity;metal ion binding	calcineurin-mediated signaling	3.1.3.16 (Protein-serine/threonine phosphatase)
116	Bcin02g01600	Spe	41	0.495737	0.000650297	0.126359	0.0113902		5.72707e-07	0.00553644	1.6261e-05	4.19017e-07	1.18323e-07	0.00170439	1.20873e-05	1.64122e-07		bcin_chr_2:629,717..632,265(+)		Heterokaryon incompatibility	Heterokaryon incompatibility
117	Bcin02g01620	Spe	11	0.355842	0.00715428	0.12774	0.00379306		9.87161e-07	0.0124376	3.08182e-05	1.2112e-06	-4.92818e-07	-0.00386234	1.22297e-05	2.18331e-07		bcin_chr_2:635,198..636,336(-)							integral component of membrane			4.2.3.- (Acting on phosphates.)
118	Bcin02g01650	Vir	6	0.73452	0.000837255	0.118493	0.0174098		2.95489e-07	0.00709231	1.5e-05	4.34504e-07	2.75695e-07	0.00337219	1.33333e-05	1.18456e-07		bcin_chr_2:640,084..643,167(+)		Sugar/inositol transporter;Major facilitator, sugar transporter-like;Sugar transporter, conserved site;MFS transporter superfamily	Major facilitator, sugar transporter-like		MFS transporter superfamily	Sugar/inositol transporter	integral component of membrane;membrane	transmembrane transporter activity	transmembrane transport
119	Bcin02g01790	SpeVir	9	0.135837	-0.0290974	0.044727	0.0841902		-7.80974e-07	-0.00611687	1.40778e-05	1.79079e-07	1.52722e-06	0.0185852	1.76959e-05	5.3266e-07		bcin_chr_2:691,446..693,697(-)	BctubB	Tubulin;Alpha tubulin;Tubulin/FtsZ, GTPase domain;Tubulin/FtsZ, C-terminal;Tubulin, conserved site;Tubulin/FtsZ, 2-layer sandwich domain;Tubulin/FtsZ, GTPase domain superfamily	Tubulin/FtsZ, GTPase domain;Tubulin/FtsZ, 2-layer sandwich domain	Tubulin/FtsZ, GTPase domain;Tubulin/FtsZ, 2-layer sandwich domain	Tubulin/FtsZ, GTPase domain superfamily;Tubulin/FtsZ, C-terminal		microtubule	GTP binding;GTPase activity;structural constituent of cytoskeleton	microtubule-based process	3.6.1.15 (Nucleoside-triphosphate phosphatase)
120	Bcin02g01810	Vir	8	0.214405	-0.0305763	0.15494	0.0578702		-1.65663e-06	-0.0141254	1.53375e-05	3.07569e-07	1.60697e-06	0.0202356	1.84868e-05	6.41574e-07		bcin_chr_2:699,116..701,014(+)		TspO/MBR-related protein	TspO/MBR-related protein				integral component of membrane
121	Bcin02g01900	Spe	21	0.28397	0.0112137	0.13273	-0.0102582		7.0527e-07	0.00857362	2.67524e-05	8.79024e-07	-5.83372e-07	-0.00677942	1.34937e-05	2.43119e-07		bcin_chr_2:723,218..726,315(-)		Zn(2)-C6 fungal-type DNA-binding domain;Transcription factor domain, fungi;Zn(2)-C6 fungal-type DNA-binding domain superfamily	Zn(2)-C6 fungal-type DNA-binding domain;Transcription factor domain, fungi	Zn(2)-C6 fungal-type DNA-binding domain;Transcription factor domain, fungi	Zn(2)-C6 fungal-type DNA-binding domain superfamily		host cell nucleus;nucleus	DNA binding;DNA-binding transcription factor activity, RNA polymerase II-specific;protein binding;zinc ion binding	regulation of transcription, DNA-templated;transcription, DNA-templated
122	Bcin02g01910	Spe	20	0.344754	0.0013925	0.179945	0.000640855		-3.58251e-08	-0.00138423	2.0515e-05	6.26489e-07	7.0775e-08	0.00146041	1.17263e-05	2.4114e-07		bcin_chr_2:726,929..729,152(+)		Methyltransferase domain	Methyltransferase domain
123	Bcin02g02000	Vir	9	0.420813	0.0151688	0.213487	-0.0479903		3.81649e-07	0.00320473	1.25889e-05	2.01228e-07	-1.40178e-06	-0.0147366	4.94503e-05	2.71309e-06		bcin_chr_2:748,955..750,151(-)		Glycoside hydrolase, family 43;Glycosyl hydrolase, five-bladed beta-propellor domain superfamily	Glycoside hydrolase, family 43		Glycosyl hydrolase, five-bladed beta-propellor domain superfamily			hydrolase activity, hydrolyzing O-glycosyl compounds	carbohydrate metabolic process	3.2.1.37 (Xylan 1,4-beta-xylosidase)
124	Bcin02g02060	Vir	10	0.442674	-0.0128367	0.179639	0.0742175		1.35601e-06	0.0123392	1.641e-05	4.23691e-07	1.72284e-06	0.019156	1.66316e-05	4.11003e-07		bcin_chr_2:763,673..765,486(-)
125	Bcin02g02110	Vir	5	0.115576	-0.0215788	0.0244915	0.0774181		-1.3815e-08	-0.000808859	1.146e-05	8.74429e-08	1.66469e-06	0.027885	3.77684e-05	2.3845e-06		bcin_chr_2:783,441..784,753(-)	Bcrpe1	Ribulose-phosphate 3-epimerase-like;Ribulose-phosphate binding barrel;Ribulose-phosphate 3-epimerase	Ribulose-phosphate 3-epimerase-like		Ribulose-phosphate binding barrel			catalytic activity;metal ion binding;racemase and epimerase activity, acting on carbohydrates and derivatives;ribulose-phosphate 3-epimerase activity	carbohydrate metabolic process;pentose-phosphate shunt	5.1.3.1 (Ribulose-phosphate 3-epimerase)
126	Bcin02g02320	Spe	3	0.0880748	-0.0314784	0.0344969	0.0530244		-1.54101e-06	-0.013481	1.78333e-05	3.39002e-07	6.21984e-07	0.00683905	1.05614e-05	1.37788e-07		bcin_chr_2:849,145..850,878(+)		Oxidoreductase, N-terminal;NAD(P)-binding domain superfamily	Oxidoreductase, N-terminal		NAD(P)-binding domain superfamily			oxidoreductase activity		1.3.1.20 (Trans-1,2-dihydrobenzene-1,2-diol dehydrogenase)
127	Bcin02g02350	Vir	10	0.167453	-0.0216624	0.00529933	0.0598214		-7.60095e-07	-0.00596029	1.234e-05	2.11564e-07	1.84513e-06	0.0196798	3.08211e-05	1.47299e-06		bcin_chr_2:859,061..860,407(+)	Bcmrp7	Ribosomal protein L27;Ribosomal protein L27, conserved site	Ribosomal protein L27			Ribosomal protein L27	ribosome	structural constituent of ribosome	translation
128	Bcin02g02420	Vir	13	0.00577128	-0.0512526	7.38958e-05	0.102659		-1.56368e-06	-0.02048	1.84154e-05	4.94298e-07	7.31573e-07	0.00759598	1.31903e-05	2.67737e-07		bcin_chr_2:891,561..895,883(-)		Acyltransferase ChoActase/COT/CPT;Choline/carnitine acyltransferase domain	Choline/carnitine acyltransferase domain					transferase activity, transferring acyl groups		2.3.1.21 (Carnitine O-palmitoyltransferase)
129	Bcin02g02680	Spe	5	0.475435	-0.013418	0.00305991	0.0813845		1.84708e-06	0.0175883	1.384e-05	3.12515e-07	-1.60205e-07	-0.00113183	1.37684e-05	1.20245e-07		bcin_chr_2:962,793..967,092(-)		CASTOR, ACT domain	CASTOR, ACT domain
130	Bcin02g03080	Vir	32	0.0165498	-0.0427617	3.6757e-05	0.103546		-2.02765e-06	-0.015196	1.54562e-05	3.02949e-07	2.82534e-06	0.0326283	2.79375e-05	1.06556e-06		bcin_chr_2:1,110,073..1,111,344(-)		Succinate dehydrogenase/fumarate reductase type B, transmembrane subunit;Succinate dehydrogenase, cytochrome b556 subunit;Succinate dehydrogenase, cytochrome b subunit, conserved site;Fumarate reductase/succinate dehydrogenase, transmembrane subunit	Succinate dehydrogenase/fumarate reductase type B, transmembrane subunit		Fumarate reductase/succinate dehydrogenase, transmembrane subunit	Succinate dehydrogenase, cytochrome b556 subunit	integral component of membrane;membrane;succinate dehydrogenase complex	electron transfer activity;metal ion binding;oxidoreductase activity, acting on the CH-CH group of donors;succinate dehydrogenase activity	tricarboxylic acid cycle	1.3.5.1 (Succinate dehydrogenase (quinone))
131	Bcin02g03090	Vir	13	0.0107158	-0.0452306	3.65905e-05	0.100893		-2.31084e-06	-0.0175311	1.89308e-05	4.5852e-07	2.6577e-06	0.0305712	2.57733e-05	9.51877e-07		bcin_chr_2:1,112,257..1,114,496(+)		Glycoside hydrolase family 1;Glycoside hydrolase superfamily;Glycosyl hydrolases family 1, N-terminal conserved site	Glycoside hydrolase family 1		Glycoside hydrolase superfamily			hydrolase activity, hydrolyzing O-glycosyl compounds	carbohydrate metabolic process	3.2.1.21 (Beta-glucosidase)
132	Bcin02g03220	Spe	8	0.026831	-0.0337182	0.093698	0.0741382		-1.11856e-06	-0.0151882	1.87625e-05	5.35919e-07	9.65898e-07	0.0150606	1.66579e-05	4.47056e-07		bcin_chr_2:1,144,843..1,146,439(+)	Bcaqp5	Major intrinsic protein;Aquaporin-like;Aquaporin transporter	Major intrinsic protein		Aquaporin-like		integral component of membrane;membrane	channel activity	transmembrane transport
133	Bcin02g03280	Vir	5	0.0608381	0.0117061	7.02586e-05	-0.0146382		5.47925e-07	0.00398898	1.044e-05	1.27027e-07	-2.21134e-07	-0.000980524	3.61895e-05	1.53514e-06		bcin_chr_2:1,172,371..1,173,708(-)	Bccfd1	Mrp, conserved site;Mrp/NBP35 ATP-binding protein;P-loop containing nucleoside triphosphate hydrolase;Cytosolic Fe-S cluster assembly factor NUBP2/Cfd1, eukaryotes;Flagellum site-determining protein YlxH/ Fe-S cluster assembling factor NBP35	Flagellum site-determining protein YlxH/ Fe-S cluster assembling factor NBP35		P-loop containing nucleoside triphosphate hydrolase		cytoplasm	4 iron, 4 sulfur cluster binding;ATP binding;metal ion binding	iron-sulfur cluster assembly
134	Bcin02g03290	Vir	33	0.0885418	0.0202947	0.0455602	-0.0447623		1.06117e-06	0.00755371	1.28727e-05	2.02354e-07	-1.39669e-06	-0.0138433	2.78118e-05	1.06235e-06		bcin_chr_2:1,173,760..1,177,469(+)
135	Bcin02g03310	Vir	33	0.278929	-0.00203032	0.212739	0.0112706		-1.76821e-07	-0.00134861	1.13273e-05	1.27404e-07	5.08838e-07	0.00468162	1.99713e-05	6.05845e-07		bcin_chr_2:1,192,891..1,195,201(+)		Nicotianamine synthase;S-adenosyl-L-methionine-dependent methyltransferase	Nicotianamine synthase		S-adenosyl-L-methionine-dependent methyltransferase			nicotianamine synthase activity	nicotianamine biosynthetic process	2.5.1.43 (Nicotianamine synthase)
136	Bcin02g03320	Vir	5	0.297458	0.00938902	0.17873	-0.0237779		-3.44846e-07	-0.00191457	1.17e-05	9.13372e-08	1.35515e-07	0.00240809	1.37053e-05	3.12611e-07		bcin_chr_2:1,195,785..1,200,490(-)	Bchap2	Nuclear transcription factor Y subunit A	Nuclear transcription factor Y subunit A	Nuclear transcription factor Y subunit A			nucleus	DNA binding;DNA-binding transcription factor activity	regulation of transcription, DNA-templated
137	Bcin02g03960	SpeVir	14	0.00676382	-0.0338117	0.00561944	0.0738524		-2.06823e-06	-0.0204395	5.14714e-05	2.48361e-06	1.79261e-06	0.0223167	2.62932e-05	9.88746e-07		bcin_chr_2:1,389,939..1,394,313(+)		Mechanosensitive ion channel MscS;LSM domain superfamily;EF-hand domain pair;Mechanosensitive ion channel MscS-like, plants/fungi	Mechanosensitive ion channel MscS		EF-hand domain pair;LSM domain superfamily		endoplasmic reticulum membrane;integral component of membrane;membrane	calcium ion binding	transmembrane transport
138	Bcin02g03970	Spe	19	0.105783	-0.0276403	0.0287224	0.0472912		-1.39544e-06	-0.0150301	2.49263e-05	8.05623e-07	6.28136e-07	0.010083	1.28643e-05	2.65818e-07		bcin_chr_2:1,394,316..1,396,974(-)		NTF2-like domain superfamily			NTF2-like domain superfamily
139	Bcin02g04430	SpeVir	13	0.387971	0.0112243	0.304842	-0.0149511		4.74114e-07	0.00541163	1.45e-05	2.81279e-07	-3.32442e-09	-0.00500005	2.41538e-05	9.78667e-07		bcin_chr_2:1,568,660..1,570,138(-)		Short-chain dehydrogenase/reductase SDR;NAD(P)-binding domain superfamily	Short-chain dehydrogenase/reductase SDR		NAD(P)-binding domain superfamily					1.1.1.- (With NAD(+) or NADP(+) as acceptor.)
140	Bcin02g04440	Spe	9	0.104743	0.0121588	0.0691704	-0.0105528		1.68967e-06	0.0168795	3.24667e-05	1.35061e-06	-1.30679e-06	-0.0196781	2.72164e-05	1.09507e-06		bcin_chr_2:1,570,286..1,571,646(+)		Cellulose-binding domain, fungal;Cellulose-binding domain superfamily	Cellulose-binding domain, fungal	Cellulose-binding domain, fungal	Cellulose-binding domain superfamily		extracellular region	cellulose binding	carbohydrate metabolic process	3.2.1.4 (Cellulase)
141	Bcin02g04450	Vir	8	0.216535	0.0175477	0.179273	-0.0387061		1.19062e-06	0.0107677	1.82e-05	4.19588e-07	-1.30807e-06	-0.018331	4.43947e-05	2.40921e-06		bcin_chr_2:1,571,642..1,573,867(-)	Bcalg9	GPI mannosyltransferase;Alpha-1,2-mannosyltransferase ALG9-like	GPI mannosyltransferase				endoplasmic reticulum membrane;integral component of membrane	dol-P-Man:Man(6)GlcNAc(2)-PP-Dol alpha-1,2-mannosyltransferase activity;dol-P-Man:Man(8)GlcNAc(2)-PP-Dol alpha-1,2-mannosyltransferase activity;mannosyltransferase activity;transferase activity, transferring glycosyl groups	GPI anchor biosynthetic process;protein glycosylation	2.4.1.- (Hexosyltransferases.)
142	Bcin02g04480	Vir	10	0.179261	-0.0333784	0.0152771	0.0666965		-1.05327e-06	-0.00912665	1.512e-05	3.12411e-07	-1.07157e-08	0.00307578	1.08632e-05	1.38863e-07		bcin_chr_2:1,583,774..1,585,553(-)		Mpv17/PMP22	Mpv17/PMP22				integral component of membrane
143	Bcin02g04540	Vir	10	0.0538351	-0.00535327	0.139808	0.0186462		1.93668e-08	-0.00110068	1.353e-05	2.01137e-07	2.58775e-07	0.00591188	1.21895e-05	2.50493e-07		bcin_chr_2:1,609,305..1,611,180(+)		U3 snoRNA associated	U3 snoRNA associated					snoRNA binding	rRNA processing
144	Bcin02g04560	Vir	14	0.574649	0.00884485	0.13715	-0.0390179		-1.40029e-07	0.00040362	1.07429e-05	7.85889e-08	-6.91471e-07	-0.0045781	1.01805e-05	1.07621e-07		bcin_chr_2:1,632,906..1,636,559(+)							integral component of membrane
145	Bcin02g04590	Vir	29	0.287084	-0.00437728	0.113152	0.0146814		6.09642e-08	-0.00037175	1.0369e-05	8.57031e-08	2.48849e-07	0.00249275	9.50998e-06	1.06122e-07		bcin_chr_2:1,644,944..1,648,040(+)		GDP-fucose protein O-fucosyltransferase	GDP-fucose protein O-fucosyltransferase				integral component of membrane	transferase activity	fucose metabolic process
146	Bcin02g04600	Vir	12	0.382156	-0.0180711	0.000288126	0.0958461		1.04172e-06	0.00617752	1.22167e-05	1.70011e-07	1.51387e-06	0.0203322	2.21842e-05	8.75972e-07		bcin_chr_2:1,653,056..1,654,283(+)		Protein of unknown function DUF1349	Protein of unknown function DUF1349
147	Bcin02g04610	Vir	30	0.155998	-0.037505	3.93298e-05	0.109921		-4.89491e-07	-0.00456598	1.58633e-05	3.51705e-07	1.7546e-06	0.0247338	2.21088e-05	7.23828e-07		bcin_chr_2:1,655,778..1,657,854(-)		AMP-dependent synthetase/ligase;AMP-binding, conserved site	AMP-dependent synthetase/ligase					catalytic activity
148	Bcin02g04640	Vir	9	0.112419	-0.0324342	0.00269172	0.0730322		-1.07811e-06	-0.00763643	1.21556e-05	2.0159e-07	2.30515e-06	0.0233246	1.80351e-05	5.50613e-07		bcin_chr_2:1,660,617..1,661,498(-)		Ubiquitin 3 binding protein But2, C-terminal	Ubiquitin 3 binding protein But2, C-terminal
149	Bcin02g04790	Vir	8	0.274107	0.0150127	0.147331	-0.0124505		5.70169e-07	0.00384852	1.05125e-05	1.66239e-07	5.3908e-08	0.00442497	3.8e-05	2.5752e-06		bcin_chr_2:1,707,676..1,709,137(+)
150	Bcin02g04830	Vir	7	0.40831	0.0025871	0.133387	-0.016871		-4.71797e-07	-0.00372992	1.15429e-05	1.2615e-07	-5.5678e-07	-0.00213786	1.62556e-05	3.51481e-07		bcin_chr_2:1,719,178..1,720,737(-)	Bcyhi9	Phenazine biosynthesis PhzF protein	Phenazine biosynthesis PhzF protein			Phenazine biosynthesis PhzF protein		catalytic activity	biosynthetic process	5.1.-.- (Racemases and epimerases.)
151	Bcin02g04840	Vir	6	0.00331456	0.0397722	0.0296049	-0.0250432		2.80607e-06	0.0238509	3.545e-05	1.18252e-06	-9.00558e-07	-0.00218942	1.97193e-05	6.37049e-07		bcin_chr_2:1,720,939..1,723,280(-)		Phosphate permease;Major facilitator, sugar transporter-like;Sugar transporter, conserved site;MFS transporter superfamily	Major facilitator, sugar transporter-like		MFS transporter superfamily	Phosphate permease	integral component of membrane	inorganic phosphate transmembrane transporter activity;transmembrane transporter activity	phosphate ion transport;transmembrane transport	3.1.2.12 (S-formylglutathione hydrolase)
152	Bcin02g05030	Vir	1	0.060875	-0.0344075	1.95103e-05	0.106191		1.70104e-09	0.00134536	1.47e-05	9.92089e-08	1.2217e-06	0.0141197	1.63158e-05	2.81163e-07		bcin_chr_2:1,798,246..1,802,873(+)		Gti1/Pac2 family	Gti1/Pac2 family
153	Bcin02g05270	Vir	21	0.0208566	-0.0439321	0.00476125	0.110061		-7.76654e-07	-0.00920183	1.58952e-05	2.69965e-07	1.68226e-06	0.0337572	3.09875e-05	1.79498e-06		bcin_chr_2:1,879,777..1,884,855(+)	Bckre5	UDP-glucose:Glycoprotein Glucosyltransferase;Nucleotide-diphospho-sugar transferases;Glucosyltransferase 24, catalytic domain;UDP-glucose:glycoprotein glucosyltransferase, thioredoxin-like domain 4;UGGT, thioredoxin-like domain 3;UGGT, thioredoxin-like domain 1;UGGT, thioredoxin-like domain 2	UDP-glucose:Glycoprotein Glucosyltransferase;UGGT, thioredoxin-like domain 1;UGGT, thioredoxin-like domain 2;UGGT, thioredoxin-like domain 3;UDP-glucose:glycoprotein glucosyltransferase, thioredoxin-like domain 4;Glucosyltransferase 24, catalytic domain		Nucleotide-diphospho-sugar transferases		endoplasmic reticulum lumen	UDP-glucose:glycoprotein glucosyltransferase activity	protein glycosylation	2.4.1.- (Hexosyltransferases.)
154	Bcin02g05280	Vir	5	0.0230875	-0.0430987	0.0180552	0.0948684		-1.36014e-06	-0.0172589	1.54e-05	3.15346e-07	1.50784e-06	0.0297673	4.40211e-05	3.11166e-06		bcin_chr_2:1,885,632..1,887,129(+)
155	Bcin02g05620	Spe	4	0.192143	-0.0252667	0.398499	0.0418053		-7.08577e-07	0.00392459	3.735e-05	1.88437e-06	9.62494e-08	-0.00262869	9.76316e-06	1.55011e-07		bcin_chr_2:2,027,432..2,030,758(-)		Amino acid/polyamine transporter I	Amino acid/polyamine transporter I				integral component of membrane;membrane	transmembrane transporter activity	transmembrane transport	3.5.1.9 (Arylformamidase)
156	Bcin02g05630	Spe	7	0.698264	-0.00281551	0.14487	0.0504441		2.21983e-06	0.0240592	4.69571e-05	2.14156e-06	-9.1403e-07	-0.00784879	1.26165e-05	3.35105e-07		bcin_chr_2:2,032,777..2,034,188(+)		LysM domain	LysM domain	LysM domain
157	Bcin02g05640	Spe	14	0.368705	-0.00554673	0.173331	0.0457195		1.8594e-06	0.0238012	4.89786e-05	2.58579e-06	-2.26999e-06	-0.0229309	2.26541e-05	7.6901e-07		bcin_chr_2:2,034,634..2,037,029(+)		SKP1/BTB/POZ domain superfamily			SKP1/BTB/POZ domain superfamily
158	Bcin02g05650	SpeVir	3	0.508201	-0.00766859	0.29587	0.0333068		1.61082e-06	0.0111878	3.20333e-05	1.06965e-06	-3.05607e-06	-0.0310743	2.82456e-05	1.15145e-06		bcin_chr_2:2,037,864..2,038,986(+)	Bcgst16	Glutathione S-transferase, N-terminal;Glutathione S-transferase, C-terminal;Thioredoxin-like superfamily;Glutathione S-transferase, C-terminal domain superfamily;Glutathione Transferase family	Glutathione S-transferase, C-terminal;Glutathione S-transferase, N-terminal		Glutathione S-transferase, C-terminal domain superfamily;Thioredoxin-like superfamily			protein binding		2.5.1.18 (Glutathione transferase)
159	Bcin02g05670	SpeVir	14	0.480867	0.00994053	0.148748	0.0471998		3.2102e-06	0.035264	5.18714e-05	2.5921e-06	-1.5667e-06	-0.0148781	2.15038e-05	7.19067e-07		bcin_chr_2:2,040,237..2,041,315(+)							integral component of membrane
160	Bcin02g05680	Spe	13	0.404885	0.0132342	0.195425	-0.000658039		1.32034e-06	0.0153449	4.02231e-05	1.92755e-06	-5.59138e-07	-0.00568957	1.49474e-05	3.79535e-07		bcin_chr_2:2,041,459..2,043,141(+)							integral component of membrane
161	Bcin02g05730	Vir	23	0.107395	-0.00328224	0.153719	0.00164648		2.00069e-07	0.00344256	2.32043e-05	8.37352e-07	-7.974e-07	-0.0141646	4.88741e-05	2.94535e-06		bcin_chr_2:2,055,285..2,057,667(-)		Amidase signature domain;Amidase signature (AS) superfamily	Amidase signature domain		Amidase signature (AS) superfamily					6.3.5.7 (Glutaminyl-tRNA synthase (glutamine-hydrolyzing))
162	Bcin02g05740	Vir	16	0.276719	0.00449224	0.328191	-0.0091202		9.3272e-08	0.0026397	1.58312e-05	3.21238e-07	-7.38058e-08	-0.00659386	6.31316e-05	3.56331e-06		bcin_chr_2:2,059,377..2,061,748(+)	Bcdal1	Dihydroorotase, conserved site;Amidohydrolase-related;Metal-dependent hydrolase, composite domain superfamily;Deoxyribonuclease, TatD-related, conserved site;Metal-dependent hydrolase	Amidohydrolase-related		Metal-dependent hydrolase, composite domain superfamily;Metal-dependent hydrolase			endodeoxyribonuclease activity, producing 5'-phosphomonoesters;hydrolase activity;hydrolase activity, acting on carbon-nitrogen (but not peptide) bonds;hydrolase activity, acting on carbon-nitrogen (but not peptide) bonds, in cyclic amides;metal ion binding		3.5.2.3 (Dihydroorotase)
163	Bcin02g05750	Vir	15	0.112972	-0.0076776	0.0581391	0.0261601		3.2809e-07	0.00232958	1.68133e-05	4.53367e-07	-1.10775e-07	-0.00214806	2.42807e-05	8.59243e-07		bcin_chr_2:2,061,926..2,063,507(+)		Ribonuclease H-like superfamily			Ribonuclease H-like superfamily			nucleic acid binding
164	Bcin02g05770	SpeVir	20	0.0333548	-0.035884	0.115985	0.070631		-1.12671e-06	-0.00930912	4.4615e-05	2.05663e-06	1.88467e-06	0.0220117	2.51105e-05	8.71492e-07		bcin_chr_2:2,066,699..2,069,786(-)		Ankyrin repeat;Ankyrin repeat-containing domain;Ankyrin repeat-containing domain superfamily	Ankyrin repeat-containing domain	Ankyrin repeat	Ankyrin repeat-containing domain superfamily			protein binding		3.4.21.72 (IgA-specific serine endopeptidase)
165	Bcin02g05990	Vir	11	0.00401184	-0.0495693	3.15676e-05	0.099562		-1.95073e-06	-0.0202091	1.94909e-05	5.47945e-07	1.55697e-06	0.0212328	1.54067e-05	3.7436e-07		bcin_chr_2:2,118,651..2,121,203(+)	Bcubp10	Peptidase C19, ubiquitin carboxyl-terminal hydrolase;Ubiquitin specific protease, conserved site;Ubiquitin carboxyl-terminal hydrolase 8;Papain-like cysteine peptidase superfamily	Peptidase C19, ubiquitin carboxyl-terminal hydrolase		Papain-like cysteine peptidase superfamily			thiol-dependent ubiquitin-specific protease activity;zinc ion binding	histone deubiquitination;protein deubiquitination;ubiquitin-dependent protein catabolic process	3.4.19.12 (Ubiquitinyl hydrolase 1)
166	Bcin02g06000	Vir	10	0.00838302	-0.0458169	4.22577e-05	0.0968006		-2.28995e-06	-0.0249538	2.709e-05	9.71416e-07	2.18352e-06	0.0278413	2.03579e-05	7.41523e-07		bcin_chr_2:2,124,593..2,127,368(+)		Domain of unknown function DUF2427;Uncharacterised domain YCR061W, C-terminal	Domain of unknown function DUF2427;Uncharacterised domain YCR061W, C-terminal				integral component of membrane
167	Bcin02g06010	Spe	18	0.296272	0.000677116	0.339564	-0.027133		-6.56405e-07	-0.00083482	0.000103567	6.28779e-06	-4.69028e-07	-0.00569638	1.68889e-05	4.94251e-07		bcin_chr_2:2,128,405..2,129,423(-)
168	Bcin02g06030	Spe	11	0.12981	0.00373643	0.0453401	0.00662901		6.93101e-07	0.00334355	4.63909e-05	2.08135e-06	-5.41901e-07	-0.000251451	2.58278e-05	8.80787e-07		bcin_chr_2:2,131,709..2,133,995(-)		SprT-like;SprT-like, zinc ribbon domain;High mobility group box domain superfamily	SprT-like;SprT-like, zinc ribbon domain	SprT-like	High mobility group box domain superfamily					2.4.1.- (Hexosyltransferases.)
169	Bcin02g06050	Vir	24	0.072502	-0.01769	0.056437	0.0425028		-8.34244e-07	-0.0110652	3.46167e-05	1.30021e-06	7.96877e-07	0.0162694	2.55921e-05	1.23722e-06		bcin_chr_2:2,137,764..2,140,796(+)		RINT-1/Tip20	RINT-1/Tip20				endoplasmic reticulum		Golgi vesicle transport
170	Bcin02g06060	SpeVir	3	0.00438166	-0.0493709	0.00010672	0.0995964		-3.28367e-06	-0.0358865	3.45e-05	1.22952e-06	2.64433e-06	0.035564	2.97544e-05	1.26066e-06		bcin_chr_2:2,141,782..2,142,852(-)		Ribosomal protein S26e	Ribosomal protein S26e				ribosome	structural constituent of ribosome	translation
171	Bcin02g06070	SpeVir	8	0.00196563	-0.0553201	1.51867e-05	0.101038		-4.11849e-06	-0.0434497	6.61875e-05	3.04588e-06	3.7435e-06	0.0470642	5.57105e-05	3.05563e-06		bcin_chr_2:2,142,927..2,143,737(+)	Bcrps31	Ubiquitin-like domain;Ribosomal protein S27a;Zinc-binding ribosomal protein;Ubiquitin conserved site;Ubiquitin domain;Ubiquitin-like domain superfamily	Ubiquitin-like domain;Ribosomal protein S27a	Ubiquitin-like domain;Ribosomal protein S27a	Ubiquitin-like domain superfamily;Zinc-binding ribosomal protein		ribosome	metal ion binding;protein binding;structural constituent of ribosome	translation
172	Bcin02g06080	Vir	18	0.00454717	-0.0511404	2.9485e-05	0.113996		-3.26556e-06	-0.0329137	3.83833e-05	1.46395e-06	3.09952e-06	0.0441007	7.75263e-05	4.9605e-06		bcin_chr_2:2,144,706..2,145,695(-)		Ribosome-assembly protein 3, C-terminal	Ribosome-assembly protein 3, C-terminal				nucleolus
173	Bcin02g06090	SpeVir	7	0.00364079	-0.0521488	9.61225e-06	0.113029		-3.10923e-06	-0.0367368	3.24714e-05	1.26339e-06	3.13364e-06	0.0462354	3.98496e-05	1.87082e-06		bcin_chr_2:2,146,191..2,147,301(-)
174	Bcin02g06110	SpeVir	60	0.00880479	-0.0463296	7.55503e-05	0.102949		-2.5017e-06	-0.0268945	2.67767e-05	9.29603e-07	2.29638e-06	0.0329523	3.49368e-05	1.66677e-06		bcin_chr_2:2,150,788..2,155,789(+)		ABC transporter-like;AAA+ ATPase domain;ABC transporter type 1, transmembrane domain;ABC transporter, conserved site;P-loop containing nucleoside triphosphate hydrolase;ABC transporter type 1, transmembrane domain superfamily	ABC transporter-like;ABC transporter type 1, transmembrane domain	AAA+ ATPase domain	P-loop containing nucleoside triphosphate hydrolase;ABC transporter type 1, transmembrane domain superfamily		integral component of membrane	ATP binding;ATPase activity;ATPase-coupled transmembrane transporter activity	transmembrane transport	1.3.1.74 (2-alkenal reductase (NAD(P)(+)))
175	Bcin02g06120	SpeVir	17	0.075616	-0.00137926	0.0564421	0.0135417		3.69255e-07	-0.00222706	4.86529e-05	1.98563e-06	2.61832e-07	0.00929469	2.97028e-05	1.45555e-06		bcin_chr_2:2,155,831..2,156,492(-)
176	Bcin02g06130	SpeVir	10	0.0119097	-0.0291247	4.83951e-05	0.0703917		-1.08938e-06	-0.0170266	3.99e-05	1.77301e-06	1.20364e-06	0.0185989	2.29368e-05	8.88305e-07		bcin_chr_2:2,156,816..2,159,434(-)		Oxysterol-binding protein;Oxysterol-binding protein, conserved site;Oxysterol-binding protein superfamily	Oxysterol-binding protein		Oxysterol-binding protein superfamily
177	Bcin02g06140	SpeVir	5	0.00501919	-0.0501327	1.91524e-05	0.108087		-3.2632e-06	-0.0314889	3.568e-05	1.3437e-06	3.45738e-06	0.0465026	4.34526e-05	2.12819e-06		bcin_chr_2:2,166,748..2,170,557(+)		CP2 transcription factor;Transcription factor CP2-like	CP2 transcription factor				nucleus	DNA-binding transcription factor activity	regulation of transcription by RNA polymerase II
178	Bcin02g06150	SpeVir	12	0.00800044	-0.00385429	0.0263739	0.0231574		4.39747e-07	0.00157747	4.4775e-05	2.00551e-06	3.30585e-07	0.00679974	1.47193e-05	3.07771e-07		bcin_chr_2:2,173,682..2,176,536(-)		Kinesin motor domain;RuvA domain 2-like;Kinesin-like protein KIF22 (Kid);P-loop containing nucleoside triphosphate hydrolase;Kinesin-like protein	Kinesin motor domain	Kinesin motor domain	RuvA domain 2-like;P-loop containing nucleoside triphosphate hydrolase			ATP binding;microtubule binding;microtubule motor activity	microtubule-based movement
179	Bcin02g06160	Spe	6	0.0239739	-0.0438562	0.000122223	0.0965447		-2.78341e-06	-0.0323296	3.62667e-05	1.69611e-06	1.87205e-06	0.0247171	1.58421e-05	4.64741e-07		bcin_chr_2:2,177,180..2,178,814(-)		Alpha/beta hydrolase fold-1;Alpha/Beta hydrolase fold	Alpha/beta hydrolase fold-1		Alpha/Beta hydrolase fold					3.1.1.- (Carboxylic ester hydrolases.)
180	Bcin02g06190	Spe	3	0.0938634	-0.00324184	0.00527535	0.0512108		1.43789e-06	0.0158992	3.9e-05	1.80682e-06	2.7592e-07	0.00429061	1.65614e-05	3.18931e-07		bcin_chr_2:2,187,181..2,189,587(+)		Zinc finger, CCCH-type superfamily;E3 ligase, CCCH-type zinc finger	E3 ligase, CCCH-type zinc finger		Zinc finger, CCCH-type superfamily			metal ion binding
181	Bcin02g06200	Spe	11	0.0344377	0.0107656	0.0175157	0.00721909		1.70208e-06	0.0172673	2.85727e-05	9.7656e-07	-4.93395e-07	-0.00275619	1.1512e-05	1.33703e-07		bcin_chr_2:2,189,588..2,190,713(-)
182	Bcin02g06210	Spe	10	0.079864	-0.00139105	0.0359128	0.0173061		1.3918e-07	0.00262252	5.69e-05	2.69875e-06	-7.60033e-08	9.82334e-05	1.82211e-05	5.64723e-07		bcin_chr_2:2,190,916..2,192,733(+)		Protein-L-isoaspartate(D-aspartate) O-methyltransferase;S-adenosyl-L-methionine-dependent methyltransferase			S-adenosyl-L-methionine-dependent methyltransferase			protein-L-isoaspartate (D-aspartate) O-methyltransferase activity	cellular protein modification process	2.1.1.77 (Protein-L-isoaspartate(D-aspartate) O-methyltransferase)
183	Bcin02g06220	SpeVir	17	0.188986	-0.00506766	0.126869	0.033702		5.51423e-07	0.00188253	3.02529e-05	9.68659e-07	1.02166e-07	0.0053233	1.72074e-05	5.29382e-07		bcin_chr_2:2,195,342..2,198,697(+)
184	Bcin02g06230	Vir	10	0.153617	0.0187584	0.0600967	-0.0326021		9.07058e-07	0.00522873	1.224e-05	1.85014e-07	-9.73067e-07	-0.00843403	1.59895e-05	3.16405e-07		bcin_chr_2:2,202,207..2,207,265(-)	Bcubp2	Peptidase C19, ubiquitin carboxyl-terminal hydrolase;Ubiquitin specific protease, conserved site;UCH repeated domain;Papain-like cysteine peptidase superfamily	Peptidase C19, ubiquitin carboxyl-terminal hydrolase;UCH repeated domain		Papain-like cysteine peptidase superfamily				protein deubiquitination;ubiquitin-dependent protein catabolic process	3.4.19.12 (Ubiquitinyl hydrolase 1)
185	Bcin02g06360	Vir	3	0.477686	-0.0164764	0.225304	0.0610885		-4.31316e-07	-0.00419131	1.47e-05	1.96136e-07	1.10577e-06	0.0230927	4.42105e-05	2.85165e-06		bcin_chr_2:2,231,636..2,235,588(-)	Bcvac14	Armadillo-type fold;Vacuolar protein 14 C-terminal Fig4-binding domain;Vacuole morphology and inheritance protein 14	Vacuolar protein 14 C-terminal Fig4-binding domain		Armadillo-type fold		PAS complex		phosphatidylinositol biosynthetic process
186	Bcin02g06900	Vir	6	0.413892	-0.000310212	0.0279458	-0.00527804		-4.56003e-07	-0.00515115	2.01833e-05	5.52017e-07	-5.12392e-10	-0.00350001	1.48772e-05	2.79138e-07		bcin_chr_2:2,436,085..2,436,924(+)	Bcrps20	Ribosomal protein S10;Ribosomal protein S10, eukaryotic/archaeal;Ribosomal protein S10, conserved site;Ribosomal protein S10 domain;Ribosomal protein S10 domain superfamily	Ribosomal protein S10 domain	Ribosomal protein S10 domain	Ribosomal protein S10 domain superfamily	Ribosomal protein S10, eukaryotic/archaeal	ribosome;small ribosomal subunit	RNA binding;structural constituent of ribosome	translation	2.4.1.13 (Sucrose synthase)
187	Bcin02g06960	Vir	1	0.0163183	-0.0400706	3.98579e-06	0.104041		-2.69037e-06	-0.0263423	9.6e-06	2.8236e-07	4.18519e-06	0.056346	6.48421e-05	3.61069e-06		bcin_chr_2:2,462,800..2,464,841(-)	Bcotu1	OTU domain;Papain-like cysteine peptidase superfamily;Ubiquitin thioesterase OTU1/2/3	OTU domain		Papain-like cysteine peptidase superfamily			thiol-dependent ubiquitin-specific protease activity;ubiquitinyl hydrolase activity	protein deubiquitination;ubiquitin-dependent ERAD pathway	3.4.19.12 (Ubiquitinyl hydrolase 1)
188	Bcin02g07070	Vir	7	0.180366	0.0125792	0.228212	-0.0340041		5.94934e-07	0.00471348	2.41286e-05	7.1907e-07	-1.67612e-06	-0.0161385	2.04211e-05	6.96695e-07		bcin_chr_2:2,500,078..2,501,427(-)
189	Bcin02g07080	Vir	17	0.0994801	0.015976	0.161394	-0.0538398		9.83308e-07	0.00595124	1.44588e-05	2.41122e-07	-2.57528e-06	-0.025855	4.46192e-05	2.0913e-06		bcin_chr_2:2,502,862..2,506,118(-)		Glucose-methanol-choline oxidoreductase, N-terminal;Glucose-methanol-choline oxidoreductase, C-terminal;Glucose-methanol-choline oxidoreductase;FAD/NAD(P)-binding domain superfamily	Glucose-methanol-choline oxidoreductase, N-terminal;Glucose-methanol-choline oxidoreductase, C-terminal		FAD/NAD(P)-binding domain superfamily			flavin adenine dinucleotide binding;oxidoreductase activity, acting on CH-OH group of donors	oxidation-reduction process	1.1.99.1 (Choline dehydrogenase)
190	Bcin02g07090	Vir	11	0.333866	0.00223872	0.0453458	-0.011368		4.09493e-07	0.000887736	1.24545e-05	1.21385e-07	-9.68743e-07	-0.0071969	1.35311e-05	2.64791e-07		bcin_chr_2:2,509,494..2,511,440(+)		NADH:flavin oxidoreductase/NADH oxidase, N-terminal	NADH:flavin oxidoreductase/NADH oxidase, N-terminal					FMN binding;catalytic activity;oxidoreductase activity	oxidation-reduction process	1.-.-.- (Oxidoreductases.)
191	Bcin02g07160	Spe	10	0.157635	0.0162628	0.124296	0.00658591		2.07701e-06	0.0238059	4.169e-05	1.90995e-06	-8.49263e-07	-0.004661	1.30211e-05	3.01764e-07		bcin_chr_2:2,526,647..2,529,152(-)	Bcspt10	GNAT domain;Zinc finger, H2C2-type, histone UAS binding;Acyl-CoA N-acyltransferase	GNAT domain;Zinc finger, H2C2-type, histone UAS binding		Acyl-CoA N-acyltransferase			N-acetyltransferase activity		2.3.1.271 (L-glutamate-5-semialdehyde N-acetyltransferase)
192	Bcin02g07170	Spe	9	0.585082	-0.000984047	0.177586	-0.0257674		-1.26321e-06	-0.00764602	1.41778e-05	2.43329e-07	3.51656e-07	0.0024302	1.29591e-05	1.95667e-07		bcin_chr_2:2,532,196..2,533,581(+)
193	Bcin02g07260	SpeVir	64	0.393994	0.00247086	0.363282	-0.00978444		7.15212e-08	0.00292673	2.44047e-05	9.08512e-07	2.67405e-07	0.000246069	1.80197e-05	5.59038e-07		bcin_chr_2:2,570,672..2,571,522(-)
194	Bcin02g07270	Spe	166	0.116916	0.000763272	0.0816314	0.0114513		7.42301e-07	0.00688539	2.26102e-05	6.55114e-07	2.31817e-08	0.00108372	1.4331e-05	2.86667e-07		bcin_chr_2:2,571,792..2,576,722(-)		WD40 repeat;NACHT nucleoside triphosphatase;Quinoprotein alcohol dehydrogenase-like superfamily;WD40 repeat, conserved site;G-protein beta WD-40 repeat;P-loop containing nucleoside triphosphate hydrolase	WD40 repeat;NACHT nucleoside triphosphatase	WD40 repeat	Quinoprotein alcohol dehydrogenase-like superfamily;P-loop containing nucleoside triphosphate hydrolase			protein binding		2.7.11.1 (Non-specific serine/threonine protein kinase)
195	Bcin02g07290	Vir	15	0.292277	0.00524193	0.289811	-0.0172914		-4.3575e-08	0.000634471	1.43933e-05	2.45935e-07	6.88261e-07	0.00674728	2.63719e-05	9.70814e-07		bcin_chr_2:2,579,128..2,585,365(-)		Sec7 domain;Sec7 domain superfamily;Pleckstrin homology domain 9	Sec7 domain;Pleckstrin homology domain 9	Sec7 domain	Sec7 domain superfamily			ARF guanyl-nucleotide exchange factor activity	regulation of ARF protein signal transduction
196	Bcin02g07310	SpeVir	32	0.258106	0.0120065	0.108001	-0.00340246		1.23391e-06	0.0125609	0.000102734	7.05108e-06	-8.92343e-07	-0.00979221	2.09901e-05	7.59041e-07		bcin_chr_2:2,589,236..2,590,879(-)	Bcap6	Aspartic peptidase A1 family;Aspartic peptidase, active site;Aspartic peptidase domain superfamily;Peptidase family A1 domain	Peptidase family A1 domain		Aspartic peptidase domain superfamily			aspartic-type endopeptidase activity	proteolysis	3.4.23.24 (Candidapepsin)
197	Bcin02g07320	Spe	11	0.106335	0.0328844	0.178597	-0.046386		2.22496e-06	0.0291563	7.27636e-05	3.87265e-06	-1.29311e-06	-0.0138058	2.29091e-05	7.36224e-07		bcin_chr_2:2,592,634..2,594,131(+)		RTA-like protein	RTA-like protein				integral component of membrane
198	Bcin02g07330	Spe	12	0.195839	0.00196536	0.287248	-0.00700017		4.04879e-09	0.00380576	3.67667e-05	1.77561e-06	9.90043e-07	0.0074872	2.44737e-05	7.71167e-07		bcin_chr_2:2,594,148..2,595,087(-)		Prion-inhibition and propagation, HeLo domain	Prion-inhibition and propagation, HeLo domain
199	Bcin02g07340	Spe	4	0.203413	0.0145242	0.204378	-0.0112879		1.0207e-06	0.00731918	1.6575e-05	3.51753e-07	1.23805e-07	-0.00173781	1.65526e-05	4.42011e-07		bcin_chr_2:2,597,400..2,599,419(-)
200	Bcin02g07360	SpeVir	16	0.0437458	0.0191618	0.0783457	-0.00535615		2.00314e-06	0.018879	4.69562e-05	2.21614e-06	-1.36167e-06	-0.0126768	2.19737e-05	7.30869e-07		bcin_chr_2:2,605,074..2,606,483(+)
201	Bcin02g07380	SpeVir	41	0.339801	-0.000888903	0.130411	0.00484665		3.94557e-08	0.000165905	1.25415e-05	1.68151e-07	-2.57027e-07	-0.00178657	2.8552e-05	1.25673e-06		bcin_chr_2:2,614,062..2,616,633(-)	Bcpet112	Aspartyl/glutamyl-tRNA amidotransferase subunit B-like;Aspartyl/glutamyl-tRNA(Asn/Gln) amidotransferase, B subunit;Aspartyl/Glutamyl-tRNA(Gln) amidotransferase, subunit B/E, catalytic;Glutamine synthetase/guanido kinase, catalytic domain;Glutamyl-tRNA(Gln) amidotransferase, subunit B, conserved site;Aspartyl/glutamyl-tRNA(Asn/Gln) amidotransferase, subunit B /E;Asn/Gln amidotransferase	Asn/Gln amidotransferase;Aspartyl/Glutamyl-tRNA(Gln) amidotransferase, subunit B/E, catalytic	Asn/Gln amidotransferase	Glutamine synthetase/guanido kinase, catalytic domain;Aspartyl/glutamyl-tRNA amidotransferase subunit B-like	Aspartyl/glutamyl-tRNA(Asn/Gln) amidotransferase, B subunit	glutamyl-tRNA(Gln) amidotransferase complex;mitochondrion	ATP binding;carbon-nitrogen ligase activity, with glutamine as amido-N-donor;catalytic activity;glutaminyl-tRNA synthase (glutamine-hydrolyzing) activity;ligase activity	glutaminyl-tRNAGln biosynthesis via transamidation;mitochondrial translation	6.3.5.- (Carbon--nitrogen ligases with glutamine as amido-N-donor.)
202	Bcin02g07480	Vir	3	0.404197	0.0028913	0.261807	0.0107625		5.35347e-07	0.0034886	1.02e-05	1.03954e-07	-1.50851e-08	0.000846656	9.68421e-06	8.82246e-08		bcin_chr_2:2,658,001..2,659,344(+)		Oxoglutarate/iron-dependent dioxygenase;Prolyl 4-hydroxylase, alpha subunit	Oxoglutarate/iron-dependent dioxygenase	Prolyl 4-hydroxylase, alpha subunit				L-ascorbic acid binding;dioxygenase activity;iron ion binding;oxidoreductase activity;oxidoreductase activity, acting on paired donors, with incorporation or reduction of molecular oxygen	oxidation-reduction process	1.14.11.2 (Procollagen-proline 4-dioxygenase)
203	Bcin02g07700	Vir	16	0.287477	0.00855416	0.19162	-0.00776791		5.38837e-07	0.00382622	9.725e-06	9.11914e-08	-7.32307e-08	-0.0014481	1.40855e-05	2.66933e-07		bcin_chr_2:2,735,391..2,737,069(+)	Bcara1	Glycoside hydrolase, family 43;Glycoside hydrolase, family 43, endo-1, 5-alpha-L-arabinosidase;Glycosyl hydrolase, five-bladed beta-propellor domain superfamily	Glycoside hydrolase, family 43		Glycosyl hydrolase, five-bladed beta-propellor domain superfamily			arabinan endo-1,5-alpha-L-arabinosidase activity;hydrolase activity, hydrolyzing O-glycosyl compounds	arabinan catabolic process;carbohydrate metabolic process	3.2.1.99 (Arabinan endo-1,5-alpha-L-arabinosidase)
204	Bcin02g07770	Vir	2	0.0580486	0.0354854	0.000179847	-0.0957894		2.07949e-06	0.018454	1.205e-05	2.79338e-07	-3.11946e-06	-0.0508491	4.73158e-05	2.47205e-06		bcin_chr_2:2,793,226..2,794,492(+)	Bcnep2	Necrosis inducing protein	Necrosis inducing protein						pathogenesis
205	Bcin02g07790	Vir	7	0.427273	-0.0233567	0.467134	0.0496522		-1.38509e-06	-0.0156124	1.86e-05	5.15803e-07	1.49592e-06	0.0207934	1.83008e-05	6.32059e-07		bcin_chr_2:2,799,434..2,804,553(+)		Carbohydrate-binding WSC	Carbohydrate-binding WSC
206	Bcin02g07800	Vir	17	0.411479	0.0143146	0.189867	-0.0642491		1.34549e-06	0.00970364	1.42471e-05	2.37265e-07	-2.91705e-06	-0.0348243	9.66068e-05	5.67675e-06		bcin_chr_2:2,819,929..2,821,038(+)
207	Bcin02g07810	Vir	22	0.528394	0.0118193	0.501854	-0.0364681		-2.08416e-07	-0.00200504	1.58273e-05	2.98942e-07	-4.21794e-08	-0.00119157	5.67512e-05	2.95764e-06		bcin_chr_2:2,820,983..2,822,343(-)		S-adenosyl-L-methionine-dependent methyltransferase			S-adenosyl-L-methionine-dependent methyltransferase					2.1.1.- (Methyltransferases.)
208	Bcin02g07820	Vir	13	0.445227	0.00379886	0.511237	-0.00752209		-6.5852e-07	-0.00386921	1.50615e-05	2.91748e-07	8.86749e-07	0.00950591	3.74737e-05	1.62424e-06		bcin_chr_2:2,824,211..2,825,496(-)		Alpha/beta hydrolase fold-1;Alpha/Beta hydrolase fold	Alpha/beta hydrolase fold-1		Alpha/Beta hydrolase fold					3.1.1.78 (Polyneuridine-aldehyde esterase)
209	Bcin02g07830	Vir	30	0.195114	0.019132	0.192285	-0.0546708		2.34147e-06	0.0145574	1.96667e-05	5.04014e-07	-3.30476e-06	-0.0373075	0.000121688	8.3234e-06		bcin_chr_2:2,826,138..2,828,259(+)							integral component of membrane
210	Bcin02g08030	Vir	16	0.552502	-0.00664507	0.300712	0.0185577		9.94801e-08	-0.000313719	1.24e-05	2.21327e-07	-4.60559e-07	-0.00245762	3.34342e-05	1.50511e-06		bcin_chr_2:2,880,957..2,882,018(+)
211	Bcin02g08140	Vir	30	0.339764	0.00993311	0.161634	-0.0163703		1.03984e-06	0.00768976	1.464e-05	2.93849e-07	-1.00747e-06	-0.0086758	1.93719e-05	5.52464e-07		bcin_chr_2:2,918,464..2,920,628(+)							integral component of membrane
212	Bcin02g08310	Vir	11	0.26744	0.0181385	0.0458039	-0.042716		1.82491e-06	0.0165687	2.46818e-05	7.83053e-07	-1.61894e-06	-0.0177701	3.94641e-05	2.0067e-06		bcin_chr_2:2,974,833..2,978,543(+)	Bcltf6	Zn(2)-C6 fungal-type DNA-binding domain;Fungal transcription factor;Zn(2)-C6 fungal-type DNA-binding domain superfamily	Zn(2)-C6 fungal-type DNA-binding domain;Fungal transcription factor	Zn(2)-C6 fungal-type DNA-binding domain	Zn(2)-C6 fungal-type DNA-binding domain superfamily		host cell nucleus;nucleus	DNA-binding transcription factor activity, RNA polymerase II-specific;zinc ion binding	regulation of transcription, DNA-templated
213	Bcin02g08420	Vir	11	0.501168	0.0116098	0.207203	-0.0474286		2.36001e-07	0.0023424	1.27909e-05	1.50917e-07	-8.08192e-07	-0.0203248	2.40574e-05	1.2927e-06		bcin_chr_2:3,007,381..3,008,421(-)	Bctma16	Translation machinery-associated protein 16	Translation machinery-associated protein 16
214	Bcin02g08440	Vir	3	0.76506	0.00562716	0.397163	-0.0323285		-2.46268e-07	-0.0002493	8.83333e-06	7.80396e-08	-4.00863e-07	-0.00532214	1.24561e-05	1.70701e-07		bcin_chr_2:3,012,282..3,014,337(-)	Bcbsd2	NEDD4/Bsd2	NEDD4/Bsd2				integral component of membrane		metal ion transport;vacuolar transport
215	Bcin02g08450	Vir	5	0.394264	0.015901	0.121404	-0.0747242		1.02907e-06	0.0053898	9.36e-06	1.17296e-07	-2.79575e-06	-0.0401308	0.000132821	1.01055e-05		bcin_chr_2:3,014,354..3,016,219(+)		Cytochrome B pre-mRNA-processing protein 6					mitochondrion	ribosome binding	mitochondrial respiratory chain complex III assembly;positive regulation of mitochondrial translation
216	Bcin02g08530	Vir	3	0.0140152	-0.0415742	3.06526e-06	0.106699		-2.55699e-06	-0.0273739	2.07e-05	7.26176e-07	3.51586e-06	0.0568978	5.72281e-05	3.24782e-06		bcin_chr_2:3,034,534..3,036,558(+)	Bcvps4	AAA+ ATPase domain;ATPase, AAA-type, core;ATPase, AAA-type, conserved site;MIT;Vps4 oligomerisation, C-terminal;P-loop containing nucleoside triphosphate hydrolase;MIT domain superfamily	ATPase, AAA-type, core;MIT;Vps4 oligomerisation, C-terminal	AAA+ ATPase domain;MIT	MIT domain superfamily;P-loop containing nucleoside triphosphate hydrolase		membrane	ATP binding		3.6.4.6 (Vesicle-fusing ATPase)
217	Bcin02g08560	Vir	16	0.283143	-0.0117572	0.116961	0.0255525		1.96851e-07	0.000492054	1.44812e-05	1.78555e-07	-3.74865e-08	0.00317638	1.60066e-05	4.06065e-07		bcin_chr_2:3,044,125..3,046,448(+)		FAD-binding 8;Ferric reductase, NAD binding domain;Ferric reductase transmembrane component-like domain;Ferredoxin-NADP reductase (FNR), nucleotide-binding domain	Ferric reductase transmembrane component-like domain;FAD-binding 8;Ferric reductase, NAD binding domain		Ferredoxin-NADP reductase (FNR), nucleotide-binding domain		integral component of membrane	oxidoreductase activity	ion transport;oxidation-reduction process
218	Bcin02g08580	Vir	1	0.00446936	-0.047134	9.76081e-06	0.100218		-3.4335e-06	-0.0496296	4.67e-05	2.26506e-06	3.08501e-06	0.0422609	3.07368e-05	1.41376e-06		bcin_chr_2:3,049,283..3,050,874(-)	Bcpac10	Prefoldin alpha-like;Prefoldin subunit 3	Prefoldin alpha-like				prefoldin complex		protein folding
219	Bcin02g08610	Vir	1	0.00944771	-0.0438346	4.23799e-05	0.0948736		-2.43135e-06	-0.0229807	1.38e-05	4.20201e-07	2.06413e-06	0.0234111	1.6e-05	5.3289e-07		bcin_chr_2:3,056,175..3,058,321(-)		DNA-directed RNA polymerase I, subunit RPA34.5	DNA-directed RNA polymerase I, subunit RPA34.5						transcription by RNA polymerase I
220	Bcin02g08650	Vir	3	0.0330121	-0.0398615	8.57838e-06	0.10963		-1.24558e-06	-0.0126816	1.62333e-05	2.57997e-07	2.33344e-06	0.0373507	1.97895e-05	7.91104e-07		bcin_chr_2:3,068,113..3,071,646(+)	Bcskn7	Heat shock factor (HSF)-type, DNA-binding;Signal transduction response regulator, receiver domain;CheY-like superfamily;Transcription factor, Skn7-like;Heat shock transcription factor family;Winged helix DNA-binding domain superfamily	Signal transduction response regulator, receiver domain;Heat shock factor (HSF)-type, DNA-binding	Heat shock factor (HSF)-type, DNA-binding;Signal transduction response regulator, receiver domain	Winged helix DNA-binding domain superfamily;CheY-like superfamily		host cell nucleus;nucleus	DNA-binding transcription factor activity;phosphorelay response regulator activity;sequence-specific DNA binding	phosphorelay signal transduction system;regulation of transcription, DNA-templated
221	Bcin02g08660	Vir	2	0.0117314	-0.0427044	2.27226e-05	0.100786		-2.49417e-06	-0.0202705	2.305e-05	6.19349e-07	2.79e-06	0.0469916	3.21579e-05	1.70584e-06		bcin_chr_2:3,071,650..3,072,259(-)
222	Bcin02g08680	Vir	7	0.0999279	-0.0237832	0.0440476	0.0643024		-1.23607e-06	-0.0156972	1.96571e-05	6.38098e-07	1.88845e-06	0.0277877	2.58797e-05	9.99141e-07		bcin_chr_2:3,075,556..3,076,651(+)
223	Bcin02g08690	Vir	4	0.0492735	-0.0362446	4.30967e-05	0.106659		-1.64319e-06	-0.0144544	1.3175e-05	2.90492e-07	2.78675e-06	0.0365174	3.51053e-05	1.71148e-06		bcin_chr_2:3,078,095..3,080,084(-)	Bcrpt3	AAA+ ATPase domain;ATPase, AAA-type, core;ATPase, AAA-type, conserved site;26S proteasome regulatory subunit P45-like;P-loop containing nucleoside triphosphate hydrolase;Proteasomal ATPase OB C-terminal domain;26S Proteasome regulatory subunit 6B	ATPase, AAA-type, core;Proteasomal ATPase OB C-terminal domain	AAA+ ATPase domain	P-loop containing nucleoside triphosphate hydrolase	26S proteasome regulatory subunit P45-like	cytoplasm;nucleus;proteasome complex	ATP binding;hydrolase activity;proteasome-activating ATPase activity	protein catabolic process	3.6.4.8 (Transferred entry: 5.6.1.5)
224	Bcin02g08700	Vir	4	0.0450293	-0.0353128	2.89036e-05	0.104602		-1.63851e-06	-0.0116747	1.1625e-05	1.91989e-07	3.16763e-06	0.042084	5.73684e-05	3.32784e-06		bcin_chr_2:3,080,238..3,081,653(+)
225	Bcin02g08750	Vir	30	0.532356	0.00700746	0.19431	-0.0283791		-4.53467e-07	-0.00259477	1.37567e-05	2.45796e-07	3.47169e-07	0.001393	1.52351e-05	3.87098e-07		bcin_chr_2:3,095,914..3,101,860(+)		ABC transporter-like;AAA+ ATPase domain;ABC-2 type transporter;ABC transporter, conserved site;P-loop containing nucleoside triphosphate hydrolase	ABC transporter-like;ABC-2 type transporter	AAA+ ATPase domain	P-loop containing nucleoside triphosphate hydrolase		integral component of membrane;membrane	ATP binding;ATPase activity		3.6.3.28 (Transferred entry: 7.3.2.2)
226	Bcin02g08760	Vir	11	0.359577	-0.0094122	0.104177	-0.000250349		-3.78722e-08	-0.00131722	9.23636e-06	9.38296e-08	-4.75271e-07	-0.00437501	1.10048e-05	1.55535e-07		bcin_chr_2:3,107,132..3,111,218(+)	Bcsmr1	Zn(2)-C6 fungal-type DNA-binding domain;Zinc finger C2H2-type;Zinc finger C2H2 superfamily;Zn(2)-C6 fungal-type DNA-binding domain superfamily	Zinc finger C2H2-type;Zn(2)-C6 fungal-type DNA-binding domain	Zn(2)-C6 fungal-type DNA-binding domain;Zinc finger C2H2-type	Zinc finger C2H2 superfamily;Zn(2)-C6 fungal-type DNA-binding domain superfamily		host cell nucleus;nucleus	DNA-binding transcription factor activity, RNA polymerase II-specific;zinc ion binding	regulation of transcription, DNA-templated
227	Bcin02g08790	Vir	1	0.685776	0.00690412	0.127986	-0.0364001		-2.16052e-08	-0.00452922	1.97e-05	1.54204e-07	-1.76086e-06	-0.00737236	1.09474e-05	1.91562e-07		bcin_chr_2:3,127,055..3,127,890(+)		Antibiotic biosynthesis monooxygenase domain;Dimeric alpha-beta barrel	Antibiotic biosynthesis monooxygenase domain		Dimeric alpha-beta barrel
228	Bcin02g09180	Vir	9	0.225258	-0.00481581	0.125894	0.0175824		1.25063e-07	-0.000929444	7.73333e-06	8.17527e-08	-3.23333e-07	0.000184315	1.17193e-05	1.81977e-07		bcin_chr_2:3,252,712..3,256,175(-)	Bcnop9	Pumilio RNA-binding repeat;Armadillo-type fold;Nucleolar protein 9		Pumilio RNA-binding repeat	Armadillo-type fold		nucleolus	RNA binding	rRNA processing
229	Bcin02g09350	Vir	4	0.0242798	-0.019495	2.3094e-05	0.056358		3.91167e-07	0.00260512	1.5975e-05	4.20417e-07	-7.88531e-07	-0.00698869	3.86316e-05	1.84565e-06		bcin_chr_2:3,310,885..3,314,370(+)
230	Bcin03g00030	Vir	43	0.445328	-0.0079804	0.406973	0.0417769		-4.81086e-07	-0.00276246	1.08512e-05	1.35568e-07	1.5065e-06	0.0228547	4.306e-05	2.55486e-06		bcin_chr_3:20,373..21,700(-)		Short-chain dehydrogenase/reductase SDR;NAD(P)-binding domain superfamily	Short-chain dehydrogenase/reductase SDR		NAD(P)-binding domain superfamily					1.3.1.33 (Protochlorophyllide reductase)
231	Bcin03g00040	Vir	21	0.335109	0.00622861	0.314133	-0.0068204		1.73934e-07	0.000243076	1.1281e-05	1.32456e-07	-7.82586e-08	0.00291195	2.30125e-05	9.57418e-07		bcin_chr_3:21,880..23,244(+)		Protein of unknown function DUF3425	Protein of unknown function DUF3425
232	Bcin03g00050	Vir	16	0.336999	0.00999237	0.33282	-0.0141045		5.29336e-07	0.00457103	1.20063e-05	1.22784e-07	-5.0377e-07	-0.004592	1.36118e-05	2.92645e-07		bcin_chr_3:24,687..26,431(-)	Bcrex3	Ribonuclease H-like superfamily;Exonuclease, RNase T/DNA polymerase III	Exonuclease, RNase T/DNA polymerase III	Exonuclease, RNase T/DNA polymerase III	Ribonuclease H-like superfamily			nucleic acid binding
233	Bcin03g00270	Vir	23	0.425429	0.00487464	0.545906	-0.000986989		2.44011e-07	0.00231001	1.2013e-05	1.8326e-07	2.51105e-07	-0.000132617	1.61556e-05	4.0478e-07		bcin_chr_3:89,632..90,637(+)							integral component of membrane
234	Bcin03g00410	Vir	66	0.377924	0.0103323	0.395813	-0.0240787		4.3798e-07	0.00339418	1.17227e-05	1.40152e-07	-5.76891e-07	-0.00594524	2.10191e-05	7.01622e-07		bcin_chr_3:131,434..133,647(-)		ATPase, AAA-type, core;P-loop containing nucleoside triphosphate hydrolase	ATPase, AAA-type, core		P-loop containing nucleoside triphosphate hydrolase			ATP binding		3.-.-.- (Hydrolases.)
235	Bcin03g00440	Vir	25	0.273579	-0.017865	0.113357	0.0636767		2.65514e-07	0.000721732	1.1188e-05	1.30634e-07	1.14318e-06	0.0117683	1.28126e-05	2.50472e-07		bcin_chr_3:141,768..145,111(-)		Cytochrome P450;Cytochrome P450, E-class, group I;Cytochrome P450, conserved site;Cytochrome P450 superfamily	Cytochrome P450		Cytochrome P450 superfamily		integral component of membrane	heme binding;iron ion binding;monooxygenase activity;oxidoreductase activity, acting on paired donors, with incorporation or reduction of molecular oxygen	oxidation-reduction process;pathogenesis	1.14.-.- (Acting on paired donors, with incorporation or reduction of molecular oxygen. The oxygen incorporated need not be derived from O(2).)
236	Bcin03g00450	Vir	7	0.287799	0.000509577	0.000415672	0.00759525		4.86612e-07	0.00302771	1.07e-05	8.52282e-08	-2.90586e-07	-0.00289364	1.83158e-05	5.00879e-07		bcin_chr_3:147,493..151,247(-)		Zn(2)-C6 fungal-type DNA-binding domain;Transcription factor domain, fungi;Zn(2)-C6 fungal-type DNA-binding domain superfamily	Zn(2)-C6 fungal-type DNA-binding domain;Transcription factor domain, fungi	Zn(2)-C6 fungal-type DNA-binding domain;Transcription factor domain, fungi	Zn(2)-C6 fungal-type DNA-binding domain superfamily		host cell nucleus;nucleus	DNA binding;DNA-binding transcription factor activity, RNA polymerase II-specific;zinc ion binding	regulation of transcription, DNA-templated;transcription, DNA-templated
237	Bcin03g00490	Spe	38	0.391317	0.0101586	0.0809773	-0.0266374		6.4462e-07	0.00401544	1.52395e-05	3.10355e-07	-1.03467e-06	-0.00425542	1.27784e-05	2.34857e-07		bcin_chr_3:175,392..178,832(-)
238	Bcin03g00530	Vir	92	0.37714	-0.00427317	0.0485441	-0.00982934		2.11643e-07	0.00108031	1.25228e-05	1.7056e-07	-8.2888e-07	-0.00732566	1.49371e-05	3.31036e-07		bcin_chr_3:194,751..196,495(+)
239	Bcin03g00550	Vir	34	0.261684	0.0133315	0.110246	-0.0225209		6.09278e-07	0.00254283	1.27735e-05	2.01086e-07	-1.0107e-06	-0.00781127	1.96811e-05	6.48927e-07		bcin_chr_3:200,477..204,493(+)
240	Bcin03g00570	Vir	8	0.252046	-0.0143579	0.00692449	0.0622773		-1.34364e-07	-0.00115858	1.08875e-05	9.87969e-08	1.23851e-06	0.0146477	1.76842e-05	5.35043e-07		bcin_chr_3:209,344..210,502(+)		Cell wall mannoprotein 1	Cell wall mannoprotein 1
241	Bcin03g00640	Spe	16	0.0562846	-0.0222116	0.150147	0.045919		-1.77073e-06	-0.0196621	6.22188e-05	2.84527e-06	1.5003e-06	0.0152254	1.77632e-05	4.31679e-07		bcin_chr_3:230,454..233,708(+)		Glucose-methanol-choline oxidoreductase, N-terminal;Glucose-methanol-choline oxidoreductase, C-terminal;Glucose-methanol-choline oxidoreductase;FAD/NAD(P)-binding domain superfamily	Glucose-methanol-choline oxidoreductase, N-terminal;Glucose-methanol-choline oxidoreductase, C-terminal		FAD/NAD(P)-binding domain superfamily			flavin adenine dinucleotide binding;oxidoreductase activity, acting on CH-OH group of donors	oxidation-reduction process	1.1.3.13 (Alcohol oxidase)
242	Bcin03g00650	SpeVir	19	0.234552	-0.0174679	0.365694	0.0079379		-1.42343e-06	-0.0116157	2.48316e-05	8.20499e-07	3.02608e-07	0.00252284	1.77784e-05	4.81731e-07		bcin_chr_3:233,870..235,700(-)		Indoleamine 2,3-dioxygenase;Tryptophan/Indoleamine 2,3-dioxygenase-like			Tryptophan/Indoleamine 2,3-dioxygenase-like			heme binding;metal ion binding	tryptophan catabolic process to kynurenine	1.13.11.11 (Tryptophan 2,3-dioxygenase)
243	Bcin03g00730	Vir	25	0.134854	0.0153962	0.0515895	-0.0613597		8.30682e-07	0.00594845	1.7488e-05	4.25854e-07	-2.0456e-06	-0.0339463	4.06737e-05	2.087e-06		bcin_chr_3:254,631..255,757(-)
244	Bcin03g00740	Vir	13	0.200469	0.00873079	0.277834	-0.000733637		3.34419e-07	0.00305309	1.44462e-05	2.91419e-07	2.56214e-07	0.00381631	2.51093e-05	1.03988e-06		bcin_chr_3:259,684..261,795(+)
245	Bcin03g00770	Spe	12	0.142664	0.00448057	0.102946	-0.00035129		7.97082e-07	0.00527645	2.0975e-05	5.76913e-07	-4.80604e-07	-0.00262681	2.25965e-05	7.83427e-07		bcin_chr_3:274,956..278,094(-)		U3 small nucleolar RNA-associated protein 8	U3 small nucleolar RNA-associated protein 8
246	Bcin03g00810	Vir	19	0.48653	0.00152354	0.21819	-0.00500145		-3.21078e-08	-7.42847e-05	1.52842e-05	2.68648e-07	6.2384e-09	0.00124282	1.74017e-05	4.64833e-07		bcin_chr_3:287,049..287,885(+)
247	Bcin03g00820	Vir	20	0.402874	-0.00148337	0.17316	0.00684138		-3.00563e-08	-0.000960817	1.437e-05	2.6678e-07	1.9176e-07	0.00515527	3.48842e-05	1.67023e-06		bcin_chr_3:288,793..290,851(-)		Amidase, conserved site;Amidase signature domain;Amidase signature (AS) superfamily	Amidase signature domain		Amidase signature (AS) superfamily			amidase activity;indoleacetamide hydrolase activity		6.3.5.7 (Glutaminyl-tRNA synthase (glutamine-hydrolyzing))
248	Bcin03g00900	Vir	76	0.387299	-0.000459376	0.121021	-0.018812		-4.80947e-07	-0.00408127	1.05224e-05	1.03912e-07	-8.9266e-07	-0.00830084	1.74224e-05	4.4501e-07		bcin_chr_3:313,866..315,402(+)		TRAM/LAG1/CLN8 homology domain	TRAM/LAG1/CLN8 homology domain	TRAM/LAG1/CLN8 homology domain			integral component of membrane
249	Bcin03g00950	Spe	41	0.279749	0.0167298	0.183227	-0.0427024		7.17585e-07	0.00683305	2.22488e-05	6.5817e-07	-7.92138e-07	-0.00770947	1.37946e-05	3.00249e-07		bcin_chr_3:332,044..335,901(-)		Phosphoribosyltransferase domain;Higher eukaryotic phosphomevalonate kinase;FAD linked oxidase, N-terminal;Phosphoribosyltransferase-like;S-adenosyl-L-methionine-dependent methyltransferase;FAD-binding, type PCMH-like superfamily	Phosphoribosyltransferase domain;FAD linked oxidase, N-terminal;Higher eukaryotic phosphomevalonate kinase		Phosphoribosyltransferase-like;S-adenosyl-L-methionine-dependent methyltransferase;FAD-binding, type PCMH-like superfamily		cytoplasm;cytosol	ATP binding;FAD binding;flavin adenine dinucleotide binding;oxidoreductase activity;phosphomevalonate kinase activity	cholesterol biosynthetic process;nucleoside metabolic process;oxidation-reduction process	2.7.4.2 (Phosphomevalonate kinase)
250	Bcin03g00970	Spe	23	0.209761	0.00560211	0.259785	-0.0333362		-1.10283e-07	-0.000155454	2.19957e-05	6.63236e-07	-8.4997e-07	-0.011404	2.26133e-05	8.35989e-07		bcin_chr_3:340,890..341,657(+)
251	Bcin03g01060	SpeVir	22	0.316385	0.0231099	0.221102	-0.0302134		2.17712e-06	0.0166101	5.37136e-05	2.18214e-06	-1.79093e-06	-0.0136983	4.57799e-05	2.38574e-06		bcin_chr_3:375,706..377,500(+)							integral component of membrane
252	Bcin03g01110	Vir	17	0.571659	-0.00139084	0.301533	-0.0308627		-1.28147e-06	-0.00878385	1.44529e-05	2.35738e-07	1.02063e-06	0.00780506	1.43158e-05	2.66396e-07		bcin_chr_3:398,103..401,220(+)
253	Bcin03g01480	Vir	5	0.47779	-0.010918	0.00190826	0.0808237		1.54155e-06	0.0137501	1.646e-05	4.30124e-07	5.725e-07	0.00601825	1.52842e-05	2.49104e-07		bcin_chr_3:492,223..494,220(+)	Bcgpx3	Glutathione peroxidase;Glutathione peroxidase active site;Glutathione peroxidase conserved site;Thioredoxin-like superfamily	Glutathione peroxidase		Thioredoxin-like superfamily			glutathione peroxidase activity	oxidation-reduction process;response to oxidative stress	1.11.1.15 (Transferred entry: 1.11.1.24)
254	Bcin03g01940	Vir	18	0.547699	-0.00285101	0.210828	0.0146754		1.1168e-06	0.00642238	1.17222e-05	1.55028e-07	-1.06687e-06	-0.00856779	1.64971e-05	4.21236e-07		bcin_chr_3:651,271..652,743(-)
255	Bcin03g02030	Vir	33	0.316008	0.00363761	0.131884	0.0119398		7.58279e-08	0.000700338	1.14909e-05	1.36177e-07	1.11503e-06	0.0166798	4.59713e-05	2.38601e-06		bcin_chr_3:680,658..683,204(+)		Peptidase S10, serine carboxypeptidase;Alpha/Beta hydrolase fold;Serine carboxypeptidases, histidine active site	Peptidase S10, serine carboxypeptidase		Alpha/Beta hydrolase fold			serine-type carboxypeptidase activity	proteolysis	3.4.16.- (Serine-type carboxypeptidases.)
256	Bcin03g02040	Vir	21	0.332885	-0.00686292	0.160489	0.0315346		-3.2142e-07	-0.00256299	1.30762e-05	1.47487e-07	1.86458e-06	0.0234891	3.81203e-05	1.84758e-06		bcin_chr_3:683,229..686,042(-)		Peptidase S53, activation domain;Sedolisin domain;Peptidase S8/S53 domain superfamily	Peptidase S53, activation domain	Peptidase S53, activation domain	Peptidase S8/S53 domain superfamily		extracellular space	metal ion binding;serine-type endopeptidase activity;serine-type peptidase activity	proteolysis	3.4.14.9 (Tripeptidyl-peptidase I)
257	Bcin03g02050	Vir	26	0.34369	0.0011833	0.224281	0.0112501		-1.51166e-07	-0.00226385	1.41077e-05	1.97153e-07	1.19058e-06	0.0162442	2.65344e-05	1.01657e-06		bcin_chr_3:686,564..692,017(+)		ABC transporter-like;AAA+ ATPase domain;ABC transporter type 1, transmembrane domain;ABC transporter, conserved site;P-loop containing nucleoside triphosphate hydrolase;ABC transporter type 1, transmembrane domain superfamily	ABC transporter-like;ABC transporter type 1, transmembrane domain	AAA+ ATPase domain	P-loop containing nucleoside triphosphate hydrolase;ABC transporter type 1, transmembrane domain superfamily		integral component of membrane	ATP binding;ATPase activity;ATPase-coupled transmembrane transporter activity	transmembrane transport
258	Bcin03g02070	Vir	16	0.157014	-0.00113731	0.0801358	-0.00259979		3.99207e-08	-0.00063247	1.34563e-05	2.0536e-07	-6.54397e-07	-0.0012896	3.975e-05	1.88881e-06		bcin_chr_3:693,576..695,746(+)		Glucose-methanol-choline oxidoreductase, N-terminal;Glucose-methanol-choline oxidoreductase, C-terminal;Glucose-methanol-choline oxidoreductase;FAD/NAD(P)-binding domain superfamily	Glucose-methanol-choline oxidoreductase, N-terminal;Glucose-methanol-choline oxidoreductase, C-terminal		FAD/NAD(P)-binding domain superfamily			flavin adenine dinucleotide binding;oxidoreductase activity, acting on CH-OH group of donors	oxidation-reduction process	1.1.99.1 (Choline dehydrogenase)
259	Bcin03g02080	Vir	15	0.394091	0.00648591	0.155091	-0.0190316		-3.94488e-08	-0.00187844	1.73133e-05	4.16827e-07	-2.79091e-07	-0.00401899	2.92281e-05	1.13971e-06		bcin_chr_3:695,779..697,809(-)		Flavin monooxygenase FMO;Flavin monooxygenase-like;FAD/NAD(P)-binding domain superfamily	Flavin monooxygenase-like		FAD/NAD(P)-binding domain superfamily			N,N-dimethylaniline monooxygenase activity;NADP binding;flavin adenine dinucleotide binding	oxidation-reduction process	1.-.-.- (Oxidoreductases.)
260	Bcin03g02180	Vir	4	0.135694	-0.0164058	0.00870932	0.049711		-1.78937e-07	-0.00283123	9.05e-06	1.25399e-07	7.49148e-07	0.00662993	1.66316e-05	5.94468e-07		bcin_chr_3:729,352..730,730(-)
261	Bcin03g02190	Vir	18	0.136057	-0.0159208	0.100207	0.0739388		-1.15824e-07	-0.00154993	1.68111e-05	2.59727e-07	1.51936e-06	0.0241827	3.11287e-05	1.26468e-06		bcin_chr_3:731,763..734,110(+)	Bcnab6	Pre-mRNA-splicing factor Cwc2/Slt11						RNA binding
262	Bcin03g02210	Vir	4	0.0634001	0.0186339	0.00408443	-0.0288539		1.71939e-06	0.00851331	1.095e-05	1.6616e-07	-2.27643e-06	-0.0198533	3.27105e-05	1.36036e-06		bcin_chr_3:736,580..738,435(-)		Uncharacterised protein family UPF0261
263	Bcin03g02220	Vir	8	0.189783	-0.0304823	0.133093	0.0731306		-1.3072e-06	-0.0100686	9.6625e-06	1.305e-07	2.23469e-06	0.022801	2.02632e-05	6.55234e-07		bcin_chr_3:738,544..739,785(+)		TIM-barrel domain, IGPS-like;Pyruvate/Phosphoenolpyruvate kinase-like domain superfamily	TIM-barrel domain, IGPS-like		Pyruvate/Phosphoenolpyruvate kinase-like domain superfamily			catalytic activity
264	Bcin03g02330	Vir	1	0.0434347	-0.0401697	1.34024e-09	0.155848		-9.54565e-07	-0.0106768	1.17e-05	1.68816e-07	3.76266e-06	0.0864883	0.000165263	1.42353e-05		bcin_chr_3:768,974..771,444(+)		UspA	UspA
265	Bcin03g02400	Vir	3	0.0275865	-0.0429846	1.44512e-05	0.128122		-7.75881e-07	-0.00945006	1.47667e-05	1.60272e-07	2.14631e-06	0.0430822	6.82456e-05	5.08024e-06		bcin_chr_3:802,241..803,114(-)
266	Bcin03g02420	Vir	5	0.191944	0.0198725	0.0587791	-0.028376		1.11851e-06	0.00737477	1.24e-05	1.98194e-07	-9.28002e-07	-0.0105439	2.94105e-05	1.17818e-06		bcin_chr_3:813,420..816,542(-)
267	Bcin03g02620	Vir	18	0.368336	0.00696164	0.0573466	-0.0202083		2.04045e-07	0.00130984	1.13778e-05	1.11016e-07	-5.5224e-07	-0.00143226	1.82047e-05	5.18344e-07		bcin_chr_3:855,038..858,304(-)	Bcpep3	Clathrin, heavy chain/VPS, 7-fold repeat;Pep3/Vps18/deep orange	Clathrin, heavy chain/VPS, 7-fold repeat;Pep3/Vps18/deep orange				membrane	metal ion binding;protein binding	intracellular protein transport;vesicle-mediated transport	5.4.99.12 (tRNA pseudouridine(38-40) synthase)
268	Bcin03g02760	Vir	3	0.283445	-0.0362775	0.0503094	0.0662447		-1.5991e-06	-0.0243926	2.05333e-05	6.62731e-07	1.21594e-06	0.0178195	1.12632e-05	2.27912e-07		bcin_chr_3:908,258..910,794(-)	Bcap4	Aspartic peptidase A1 family;Aspartic peptidase, active site;Aspartic peptidase domain superfamily;Peptidase family A1 domain;Secreted aspartic endopeptidase	Peptidase family A1 domain		Aspartic peptidase domain superfamily			aspartic-type endopeptidase activity	proteolysis	3.4.23.24 (Candidapepsin)
269	Bcin03g02850	Vir	28	0.427001	0.0039941	0.486783	-0.00540008		-3.88485e-07	-0.00173703	1.735e-05	3.90188e-07	8.22905e-07	0.0056607	1.43534e-05	3.3683e-07		bcin_chr_3:945,143..948,576(+)
270	Bcin03g02940	Spe	5	0.504938	0.0125659	0.174719	0.000876462		1.24992e-06	0.0106284	3.25e-05	1.28193e-06	-1.27301e-07	-0.00431551	9.83158e-06	9.27212e-08		bcin_chr_3:971,598..974,225(-)		Aminoacyl-tRNA synthetase, class II (G/ P/ S/T);Glycyl-tRNA synthetase;Anticodon-binding;Glycyl-tRNA synthetase/DNA polymerase subunit gamma-2;Glycyl-tRNA synthetase-like core domain	Aminoacyl-tRNA synthetase, class II (G/ P/ S/T);Anticodon-binding			Glycyl-tRNA synthetase	cytoplasm	ATP binding;aminoacyl-tRNA ligase activity;glycine-tRNA ligase activity;nucleotide binding	glycyl-tRNA aminoacylation;tRNA aminoacylation for protein translation	6.1.1.14 (Glycine--tRNA ligase)
271	Bcin03g02980	Spe	17	0.215638	-0.0153911	0.182876	0.0285674		-1.0781e-06	-0.00602676	2.38529e-05	6.64821e-07	8.72265e-07	0.00958967	1.94118e-05	5.15749e-07		bcin_chr_3:984,010..985,814(+)	Bctae1	Alpha-N-methyltransferase NTM1;S-adenosyl-L-methionine-dependent methyltransferase	Alpha-N-methyltransferase NTM1		S-adenosyl-L-methionine-dependent methyltransferase			methyltransferase activity	N-terminal protein amino acid methylation	2.1.1.244 (Protein N-terminal methyltransferase)
272	Bcin03g02990	SpeVir	34	0.0699113	0.0261947	0.258894	0.00038568		3.39951e-06	0.0244864	6.43324e-05	2.49739e-06	-6.00632e-07	-0.00271522	9.58514e-06	1.33899e-07		bcin_chr_3:985,942..986,620(+)							integral component of membrane
273	Bcin03g03020	Spe	21	0.0195919	0.021976	0.0253702	-0.0151004		2.04407e-06	0.0218692	5.39714e-05	2.30474e-06	-8.75722e-07	-0.00780387	1.50276e-05	3.19155e-07		bcin_chr_3:993,830..995,847(-)							integral component of membrane
274	Bcin03g03030	Spe	12	0.0976898	-0.0113664	0.0484257	0.0340188		-4.35951e-07	-0.000443124	3.745e-05	1.44601e-06	1.74513e-07	0.00205237	1.08333e-05	1.81418e-07		bcin_chr_3:996,452..998,466(+)							integral component of membrane
275	Bcin03g03040	Spe	27	0.140318	-0.00384627	0.180668	0.00246395		-4.54947e-07	-0.00201636	3.8737e-05	1.41064e-06	4.08957e-07	0.00739949	1.46745e-05	3.45816e-07		bcin_chr_3:998,855..1,001,095(-)		FAD-binding domain;FAD/NAD(P)-binding domain superfamily	FAD-binding domain		FAD/NAD(P)-binding domain superfamily		integral component of membrane	FAD binding		1.14.13.1 (Salicylate 1-monooxygenase)
276	Bcin03g03120	Vir	14	0.0243179	-0.0320952	0.0633273	0.0559557		-2.09495e-06	-0.0136768	1.54786e-05	3.57384e-07	1.70761e-06	0.0160349	1.88346e-05	4.83021e-07		bcin_chr_3:1,031,654..1,034,152(-)		THO complex, subunit THOC1	THO complex, subunit THOC1
277	Bcin03g03130	Vir	19	0.122081	-0.0279044	0.298602	0.0461751		-2.50513e-06	-0.0180763	1.80947e-05	4.45628e-07	2.12357e-06	0.017562	1.66648e-05	4.15281e-07		bcin_chr_3:1,034,294..1,039,101(+)		CWF11 family;P-loop containing nucleoside triphosphate hydrolase;Intron-binding protein aquarius, N-terminal;DNA2/NAM7 helicase, AAA domain;DNA2/NAM7 helicase-like, AAA domain	DNA2/NAM7 helicase, AAA domain;DNA2/NAM7 helicase-like, AAA domain;Intron-binding protein aquarius, N-terminal		P-loop containing nucleoside triphosphate hydrolase		U2-type spliceosomal complex;spliceosomal complex		mRNA cis splicing, via spliceosome;mRNA splicing, via spliceosome	3.4.21.72 (IgA-specific serine endopeptidase)
278	Bcin03g03450	Spe	15	0.500828	-0.00671889	0.154234	0.0384232		1.43045e-06	0.0127317	2.25467e-05	7.58872e-07	-4.07531e-07	-0.00423582	1.3614e-05	2.94471e-07		bcin_chr_3:1,167,610..1,169,537(-)							integral component of membrane
279	Bcin03g03460	SpeVir	16	0.289766	0.0120208	0.128712	0.024835		3.4868e-06	0.039019	0.000106406	6.19506e-06	-1.11217e-06	-0.00875011	2.31513e-05	8.18977e-07		bcin_chr_3:1,170,098..1,173,057(+)		Tetracycline resistance protein/drug resistance transporter;Major facilitator superfamily;MFS transporter superfamily	Major facilitator superfamily		MFS transporter superfamily		integral component of membrane	transmembrane transporter activity	transmembrane transport
280	Bcin03g03530	Vir	53	0.225545	-0.0213976	0.155929	0.0508686		-9.40968e-07	-0.0056569	1.40472e-05	2.32566e-07	5.21098e-07	0.00556759	1.41728e-05	3.29075e-07		bcin_chr_3:1,198,832..1,201,607(-)		Zn(2)-C6 fungal-type DNA-binding domain;Zn(2)-C6 fungal-type DNA-binding domain superfamily	Zn(2)-C6 fungal-type DNA-binding domain	Zn(2)-C6 fungal-type DNA-binding domain	Zn(2)-C6 fungal-type DNA-binding domain superfamily		host cell nucleus;nucleus	DNA-binding transcription factor activity, RNA polymerase II-specific;zinc ion binding	regulation of transcription, DNA-templated
281	Bcin03g03540	Vir	42	0.130828	-0.0225805	0.00781468	0.0668664		-6.00084e-07	-0.00754765	1.66333e-05	3.87245e-07	9.45707e-07	0.0133332	3.3817e-05	1.88644e-06		bcin_chr_3:1,201,636..1,204,506(+)
282	Bcin03g03930	Vir	20	0.302582	-0.00727903	0.190021	0.0245543		3.18692e-07	0.00206607	1.372e-05	2.96185e-07	-6.91782e-08	-7.82822e-05	2.46579e-05	9.57885e-07		bcin_chr_3:1,317,709..1,318,993(-)		Zinc finger, RING-type;Zinc finger, RING-type, conserved site	Zinc finger, RING-type	Zinc finger, RING-type			integral component of membrane
283	Bcin03g04070	Spe	2	0.48024	-0.0115958	0.266546	0.0199239		-9.60558e-07	-0.0114835	2.405e-05	7.20918e-07	-1.64094e-07	-0.00521245	1.49474e-05	2.48469e-07		bcin_chr_3:1,358,819..1,361,337(-)		Transcription initiation factor TFIID component TAF4	Transcription initiation factor TFIID component TAF4				transcription factor TFIID complex		DNA-templated transcription, initiation
284	Bcin03g04080	Vir	11	0.572741	0.000840916	0.0479452	0.0417112		2.12684e-06	0.0205877	2.76545e-05	9.84894e-07	-8.60399e-07	-0.00864442	1.99426e-05	6.97844e-07		bcin_chr_3:1,361,428..1,364,980(+)	Bcysh1	Metallo-beta-lactamase;Zn-dependent metallo-hydrolase, RNA specificity domain;Pre-mRNA 3'-end-processing endonuclease polyadenylation factor C-term;Beta-Casp domain;Ribonuclease Z/Hydroxyacylglutathione hydrolase-like	Metallo-beta-lactamase;Zn-dependent metallo-hydrolase, RNA specificity domain;Beta-Casp domain;Pre-mRNA 3'-end-processing endonuclease polyadenylation factor C-term	Metallo-beta-lactamase;Beta-Casp domain;Pre-mRNA 3'-end-processing endonuclease polyadenylation factor C-term	Ribonuclease Z/Hydroxyacylglutathione hydrolase-like		nucleus		mRNA processing	3.1.27.- (Endoribonucleases producing other than 5'-phosphomonoesters.)
285	Bcin03g04090	Spe	7	0.319325	0.0214172	0.152492	-0.00943289		2.84407e-06	0.0358848	5.97714e-05	2.77908e-06	-8.7666e-07	-0.00686835	1.41504e-05	2.56044e-07		bcin_chr_3:1,365,475..1,368,253(-)		Carbohydrate kinase, FGGY;Glycerol kinase;Carbohydrate kinase, FGGY, conserved site;Carbohydrate kinase, FGGY, N-terminal;Carbohydrate kinase, FGGY, C-terminal;ATPase, nucleotide binding domain	Carbohydrate kinase, FGGY, N-terminal;Carbohydrate kinase, FGGY, C-terminal		ATPase, nucleotide binding domain	Glycerol kinase		ATP binding;glycerol kinase activity;phosphotransferase activity, alcohol group as acceptor	carbohydrate metabolic process;glycerol catabolic process;glycerol-3-phosphate metabolic process	2.7.1.30 (Glycerol kinase)
286	Bcin03g04100	SpeVir	7	0.353931	-0.00210169	0.556794	-0.0106637		-1.52025e-06	-0.0124923	3.40571e-05	1.13754e-06	7.77279e-07	0.00721205	1.28421e-05	2.4995e-07		bcin_chr_3:1,377,286..1,380,248(-)		Heterokaryon incompatibility Het-C	Heterokaryon incompatibility Het-C
287	Bcin03g04120	Spe	12	0.10799	0.0151741	0.322225	-0.0388762		8.43492e-07	0.00607503	2.91583e-05	9.63167e-07	-1.34698e-06	-0.010231	1.57895e-05	3.80689e-07		bcin_chr_3:1,382,524..1,385,019(+)		RNA recognition motif domain;RNA recognition motif domain, eukaryote;Splicing factor, RBM39-like;Splicing factor RBM39, linker;RNA-binding domain superfamily	RNA recognition motif domain;Splicing factor RBM39, linker	RNA recognition motif domain;RNA recognition motif domain, eukaryote	RNA-binding domain superfamily	Splicing factor, RBM39-like	nucleus	RNA binding;nucleic acid binding	mRNA processing	1.3.3.3 (Coproporphyrinogen oxidase)
288	Bcin03g04130	Spe	9	0.475993	-0.000291824	0.311218	-0.0173664		-4.9809e-07	0.000604386	1.84667e-05	5.20973e-07	-1.99956e-07	-0.00228621	1.12749e-05	1.12453e-07		bcin_chr_3:1,388,223..1,392,051(-)	Bcpet127	Mitochondrial protein Pet127	Mitochondrial protein Pet127				mitochondrion		mitochondrial RNA metabolic process
289	Bcin03g04140	Spe	14	0.347433	0.00248621	0.207543	0.00916071		9.74762e-07	0.0129333	3.57857e-05	1.58887e-06	-2.14541e-07	-0.00510203	1.99474e-05	6.75244e-07		bcin_chr_3:1,392,239..1,395,372(-)		Chromatid cohesion factor MAU2	Chromatid cohesion factor MAU2						mitotic sister chromatid cohesion
290	Bcin03g04200	Vir	14	0.534311	0.00630559	0.19882	0.00863327		1.83104e-06	0.0177947	2.61143e-05	7.98671e-07	-7.30421e-07	-0.00853098	1.26617e-05	2.43259e-07		bcin_chr_3:1,404,079..1,405,776(+)		Ankyrin repeat;Ankyrin repeat-containing domain superfamily	Ankyrin repeat	Ankyrin repeat	Ankyrin repeat-containing domain superfamily			protein binding
291	Bcin03g04210	Spe	13	0.39164	0.0168872	0.298221	0.00595924		3.4552e-06	0.0426638	7.88154e-05	4.62783e-06	-1.83686e-06	-0.0200231	2.08664e-05	7.17483e-07		bcin_chr_3:1,406,196..1,408,012(+)		Major facilitator superfamily;MFS transporter superfamily	Major facilitator superfamily		MFS transporter superfamily		integral component of membrane	transmembrane transporter activity	transmembrane transport
292	Bcin03g04420	Vir	5	0.0274329	-0.0404306	2.50277e-05	0.10598		-1.2063e-06	-0.0159155	1.586e-05	3.56873e-07	1.4068e-06	0.0179638	1.36842e-05	3.37088e-07		bcin_chr_3:1,474,545..1,476,190(+)	Bcace2
293	Bcin03g04470	Spe	30	0.0695245	-0.0305801	0.0576711	0.0673488		-8.1883e-07	-0.00501636	1.526e-05	3.40996e-07	4.32357e-07	0.00412523	1.1407e-05	1.32319e-07		bcin_chr_3:1,488,308..1,492,034(+)							integral component of membrane
294	Bcin03g04620	Vir	15	0.439004	-0.00226881	0.112995	0.00388987		1.33914e-07	-0.00019263	1.028e-05	1.05613e-07	-6.84356e-07	-0.00150225	1.61263e-05	4.62906e-07		bcin_chr_3:1,541,100..1,542,990(+)							integral component of membrane
295	Bcin03g04710	Vir	10	0.221496	-0.0194935	0.156959	0.0502532		-2.29896e-06	-0.0137059	1.522e-05	3.40969e-07	3.86708e-06	0.041889	7.90632e-05	4.52655e-06		bcin_chr_3:1,581,758..1,584,210(-)
296	Bcin03g04870	Vir	12	0.101607	-0.0316	0.0800678	0.0739745		-1.73035e-06	-0.0150819	1.7725e-05	3.88363e-07	1.98434e-06	0.0200858	2.28947e-05	8.14936e-07		bcin_chr_3:1,647,499..1,649,274(-)
297	Bcin03g05110	Vir	13	0.400727	0.00881334	0.1656	-0.0293434		-3.03941e-07	-0.00132852	1.33923e-05	1.20901e-07	-1.59635e-07	-0.00194885	1.20972e-05	1.60044e-07		bcin_chr_3:1,722,685..1,724,750(+)	Bcerg27	NAD(P)-binding domain superfamily			NAD(P)-binding domain superfamily		integral component of membrane			1.1.1.270 (3-beta-hydroxysteroid 3-dehydrogenase)
298	Bcin03g05390	Vir	3	0.226159	-0.0231229	7.52336e-05	0.0952706		-1.00922e-06	-0.00511865	8.1e-06	9.99315e-08	3.04277e-06	0.0326636	3.13684e-05	1.2549e-06		bcin_chr_3:1,814,320..1,815,838(-)	Bcadi1	Acireductone dioxygenase ARD family;RmlC-like cupin domain superfamily;1,2-dihydroxy-3-keto-5-methylthiopentene dioxygenase, eukaryotes	Acireductone dioxygenase ARD family		RmlC-like cupin domain superfamily		cytoplasm;nucleus	acireductone dioxygenase [iron(II)-requiring] activity;iron ion binding;oxidoreductase activity	L-methionine salvage from methylthioadenosine;oxidation-reduction process	1.13.11.54 (Acireductone dioxygenase (Fe(2+)-requiring))
299	Bcin03g05440	Spe	13	0.130086	-0.0294991	0.00158141	0.08701		-2.23405e-07	-0.00189999	1.09e-05	1.23786e-07	1.02011e-07	0.00463745	1.28259e-05	1.61947e-07		bcin_chr_3:1,824,153..1,825,142(-)		EF-hand domain pair			EF-hand domain pair
300	Bcin03g05450	Vir	7	0.0533172	-0.0302238	0.0378699	0.0795738		-1.11928e-06	-0.00983664	1.25714e-05	2.08664e-07	1.28192e-06	0.0156442	1.57594e-05	3.53233e-07		bcin_chr_3:1,828,775..1,830,817(-)		FAD linked oxidase, N-terminal;FAD-binding, type PCMH-like superfamily	FAD linked oxidase, N-terminal		FAD-binding, type PCMH-like superfamily			FAD binding;flavin adenine dinucleotide binding;oxidoreductase activity	oxidation-reduction process	1.5.3.6 ((R)-6-hydroxynicotine oxidase)
301	Bcin03g05570	Vir	6	0.360446	-0.00183354	0.24269	-0.00414345		-9.30681e-09	0.00176388	1.04167e-05	8.9973e-08	4.66017e-08	0.0021538	1.84561e-05	6.13582e-07		bcin_chr_3:1,868,652..1,869,716(-)
302	Bcin03g06130	Vir	3	0.0386507	0.0125892	0.0787531	0.017434		1.27099e-06	0.00923871	1.6e-05	2.83359e-07	6.53228e-07	0.0196044	7.03509e-05	5.01652e-06		bcin_chr_3:2,060,150..2,062,856(+)	Bcsgv1	Protein kinase domain;Serine/threonine-protein kinase, active site;Protein kinase-like domain superfamily;Protein kinase, ATP binding site	Protein kinase domain	Protein kinase domain	Protein kinase-like domain superfamily			ATP binding;protein kinase activity	protein phosphorylation	2.7.11.23 ([RNA-polymerase]-subunit kinase)
303	Bcin03g06220	Spe	2	0.175401	0.0187495	0.00736197	-0.00104568		2.4873e-06	0.0243136	6.64e-05	3.00832e-06	-1.14476e-06	-0.00892159	1.68947e-05	4.74429e-07		bcin_chr_3:2,080,751..2,082,014(-)	Bcfur1	Phosphoribosyltransferase domain;Phosphoribosyltransferase-like			Phosphoribosyltransferase-like				nucleoside metabolic process	2.7.1.48 (Uridine/cytidine kinase)
304	Bcin03g06230	Spe	7	0.144065	0.00932666	0.187551	-0.037463		-7.69626e-07	-0.00720718	6.18571e-05	2.55675e-06	1.70589e-07	0.00207623	1.72932e-05	4.5352e-07		bcin_chr_3:2,082,664..2,086,228(+)		Wings apart-like protein, C-terminal;Wings apart-like protein	Wings apart-like protein, C-terminal
305	Bcin03g06260	Spe	11	0.372755	0.0185474	0.0683211	-0.00869613		1.64038e-06	0.0228673	5.68273e-05	2.75408e-06	-5.09128e-07	-0.00540208	1.48995e-05	2.83265e-07		bcin_chr_3:2,091,278..2,093,141(-)	Bcmsw1	Aminoacyl-tRNA synthetase, class I, conserved site;Aminoacyl-tRNA synthetase, class Ic;Tryptophan-tRNA ligase;Tryptophan-tRNA ligase, bacterial-type	Aminoacyl-tRNA synthetase, class Ic			Tryptophan-tRNA ligase		ATP binding;aminoacyl-tRNA ligase activity;nucleotide binding;tryptophan-tRNA ligase activity	tRNA aminoacylation for protein translation;tryptophanyl-tRNA aminoacylation	6.1.1.2 (Tryptophan--tRNA ligase)
306	Bcin03g06340	Vir	2	0.187371	0.0116396	0.136991	-0.0582376		7.04852e-07	0.0091563	1.975e-05	5.99438e-07	-2.10483e-06	-0.0206972	1.81579e-05	5.14587e-07		bcin_chr_3:2,117,647..2,119,891(-)
307	Bcin03g06440	Spe	4	0.492792	0.0126505	0.227761	-0.0072469		8.02242e-07	0.00506053	1.2475e-05	1.15579e-07	-1.00248e-07	0.00138776	1.16842e-05	2.18727e-07		bcin_chr_3:2,172,816..2,174,653(+)	Bcgpi18	GPI mannosyltransferase 2	GPI mannosyltransferase 2				endoplasmic reticulum membrane;integral component of membrane	alpha-1,6-mannosyltransferase activity;glycolipid mannosyltransferase activity	GPI anchor biosynthetic process	2.4.1.- (Hexosyltransferases.)
308	Bcin03g06450	SpeVir	23	0.446933	0.000536217	0.359811	0.0179024		-5.31624e-07	-0.00365319	1.43478e-05	2.01835e-07	1.95627e-06	0.0209345	3.82471e-05	1.70828e-06		bcin_chr_3:2,174,773..2,178,311(+)		YTH domain	YTH domain					RNA binding
309	Bcin03g06510	Vir	10	0.175099	-0.0325736	0.0203172	0.0948277		-3.67658e-07	-0.00659261	1.54e-05	2.29937e-07	1.63475e-06	0.027059	3.56e-05	2.25134e-06		bcin_chr_3:2,200,751..2,202,736(+)		Ornithine cyclodeaminase/mu-crystallin;NAD(P)-binding domain superfamily			NAD(P)-binding domain superfamily					1.5.1.25 (Thiomorpholine-carboxylate dehydrogenase)
310	Bcin03g06540	Vir	8	0.589205	-0.000479957	0.332948	0.0167257		3.38298e-07	0.00487832	1.23375e-05	1.18993e-07	7.99695e-07	0.00670365	1.04737e-05	1.46953e-07		bcin_chr_3:2,208,370..2,209,758(+)	Bcncs6	Cytoplasmic tRNA 2-thiolation protein 1;tRNA(Ile)-lysidine/2-thiocytidine synthase, N-terminal;Uncharacterised protein family UPF0021, conserved site;Cytoplasmic tRNA 2-thiolation protein 1, C-terminal	tRNA(Ile)-lysidine/2-thiocytidine synthase, N-terminal;Cytoplasmic tRNA 2-thiolation protein 1, C-terminal				cytoplasm	nucleotidyltransferase activity;tRNA binding	protein urmylation;tRNA thio-modification;tRNA wobble uridine modification	2.7.7.- (Nucleotidyltransferases.)
311	Bcin03g06600	Vir	19	0.114645	-0.0239534	0.135218	0.0382259		-1.38236e-06	-0.00817131	1.39737e-05	2.74825e-07	1.42068e-06	0.0107803	1.59501e-05	4.17857e-07		bcin_chr_3:2,228,667..2,231,555(-)		Heat shock protein 70 family;Heat shock protein 70, conserved site;Heat shock protein 70kD, peptide-binding domain superfamily;Heat shock protein 70kD, C-terminal domain superfamily;ATPase, nucleotide binding domain	Heat shock protein 70 family		Heat shock protein 70kD, peptide-binding domain superfamily;Heat shock protein 70kD, C-terminal domain superfamily;ATPase, nucleotide binding domain			ATP binding		3.6.4.10 (Non-chaperonin molecular chaperone ATPase)
312	Bcin03g06620	Vir	11	0.364077	-0.00164714	0.123143	0.0103266		4.64146e-07	0.0014399	1.05909e-05	1.32938e-07	-1.01105e-07	0.00108624	1.34163e-05	2.56852e-07		bcin_chr_3:2,240,811..2,242,889(-)
313	Bcin03g06630	Vir	8	0.188864	0.00136414	0.0791829	-0.000311795		2.18574e-06	0.016575	2.645e-05	7.40665e-07	-2.85452e-06	-0.0303251	3.89474e-05	2.09311e-06		bcin_chr_3:2,248,420..2,249,467(-)
314	Bcin03g06640	SpeVir	18	0.375374	0.012389	0.192627	-0.0395699		1.50627e-06	0.0104248	3.90444e-05	1.57303e-06	-2.20311e-06	-0.0308319	8.91637e-05	5.60513e-06		bcin_chr_3:2,250,825..2,252,557(-)
315	Bcin03g06680	Spe	19	0.482106	-0.00338494	0.347268	0.00460013		-9.20253e-07	-0.0100232	3.30684e-05	1.27281e-06	7.33609e-07	0.00618728	1.53463e-05	3.69105e-07		bcin_chr_3:2,260,104..2,263,020(+)		Cytochrome P450;Cytochrome P450, E-class, group I;Cytochrome P450, conserved site;Cytochrome P450 superfamily	Cytochrome P450		Cytochrome P450 superfamily			heme binding;iron ion binding;monooxygenase activity;oxidoreductase activity, acting on paired donors, with incorporation or reduction of molecular oxygen	oxidation-reduction process;pathogenesis	1.14.-.- (Acting on paired donors, with incorporation or reduction of molecular oxygen. The oxygen incorporated need not be derived from O(2).)
316	Bcin03g06720	Vir	18	0.0646372	-0.0317255	0.0347246	0.0661455		-3.05935e-07	-0.0020431	1.44333e-05	2.6423e-07	1.64003e-07	0.00255754	1.15439e-05	1.38971e-07		bcin_chr_3:2,275,485..2,277,891(-)		PPPDE putative peptidase domain;PUL domain;Thioredoxin domain;Armadillo-type fold;Thioredoxin-like superfamily	Thioredoxin domain;PPPDE putative peptidase domain;PUL domain	PPPDE putative peptidase domain	Armadillo-type fold;Thioredoxin-like superfamily			hydrolase activity		3.4.-.- (Acting on peptide bonds (peptidases).)
317	Bcin03g06740	Spe	19	0.207897	0.0199287	0.224454	0.00412703		3.54187e-06	0.0356561	7.03421e-05	3.72327e-06	-1.63399e-06	-0.0145109	1.69418e-05	4.34079e-07		bcin_chr_3:2,280,767..2,282,037(+)		Phosphatidylethanolamine-binding protein;Phosphatidylethanolamine-binding protein, eukaryotic;PEBP-like superfamily	Phosphatidylethanolamine-binding protein		PEBP-like superfamily
318	Bcin03g06750	Spe	15	0.455459	0.00452274	0.182378	-0.00901827		2.2841e-06	0.0252597	4.27267e-05	2.1517e-06	-2.06966e-06	-0.0237187	1.91719e-05	5.91663e-07		bcin_chr_3:2,283,816..2,285,153(-)
319	Bcin03g06760	Spe	14	0.402157	-0.00015138	0.243322	0.0335412		2.49304e-06	0.0307331	6.32429e-05	3.51474e-06	-1.28155e-06	-0.01374	1.87519e-05	5.54294e-07		bcin_chr_3:2,285,724..2,286,682(-)
320	Bcin03g06790	Vir	12	0.221182	0.00253129	0.132508	-0.0175029		3.19462e-07	-0.000566384	1.61583e-05	2.82306e-07	-9.43457e-07	-0.00529461	2.39035e-05	8.54665e-07		bcin_chr_3:2,293,468..2,294,575(-)
321	Bcin03g07030	Spe	8	0.434231	0.0138403	0.137234	-0.0206772		5.89653e-07	0.00306894	1.05125e-05	7.90395e-08	2.47168e-09	-0.000550619	9.53947e-06	9.18608e-08		bcin_chr_3:2,380,476..2,386,196(-)	Bcpuf3	Pumilio RNA-binding repeat;Armadillo-type fold;Pumilio, RNA binding domain	Pumilio RNA-binding repeat	Pumilio RNA-binding repeat	Armadillo-type fold			RNA binding
322	Bcin03g07170	Vir	25	0.266687	-0.00342499	0.107974	0.0207692		-3.23934e-07	-0.00289317	1.1564e-05	1.84093e-07	5.16916e-07	0.00672968	1.34989e-05	2.90377e-07		bcin_chr_3:2,431,717..2,434,417(-)		S-adenosyl-L-methionine-dependent methyltransferase			S-adenosyl-L-methionine-dependent methyltransferase
323	Bcin03g07560	Spe	1	0.655202	0.00725997	0.00111233	-0.0726269		-1.04848e-06	-0.00488257	8.1e-06	7.83332e-08	-1.65753e-06	-0.0152735	1.92632e-05	3.71138e-07		bcin_chr_3:2,562,592..2,565,525(+)		Centromere protein I	Centromere protein I				kinetochore;nucleus		centromere complex assembly
324	Bcin03g07720	Spe	14	0.399678	0.0176768	0.152731	-0.00621085		1.30771e-06	0.00797835	1.845e-05	4.32743e-07	-7.86317e-07	-0.00483752	1.31504e-05	2.40401e-07		bcin_chr_3:2,643,691..2,647,734(+)	Bcrpa135	DNA-directed RNA polymerase, subunit 2, hybrid-binding domain;RNA polymerase, beta subunit, conserved site;RNA polymerase Rpb2, domain 7;RNA polymerase Rpb2, domain 2;RNA polymerase, beta subunit, protrusion;RNA polymerase Rpb2, domain 3;DNA-directed RNA polymerase I subunit RPA2, domain 4;DNA-directed RNA polymerase, subunit 2	DNA-directed RNA polymerase, subunit 2, hybrid-binding domain;RNA polymerase Rpb2, domain 7;RNA polymerase Rpb2, domain 2;RNA polymerase, beta subunit, protrusion;RNA polymerase Rpb2, domain 3;DNA-directed RNA polymerase I subunit RPA2, domain 4				nucleus	DNA binding;DNA-directed 5'-3' RNA polymerase activity;ribonucleoside binding	transcription, DNA-templated	2.7.7.6 (DNA-directed RNA polymerase)
325	Bcin03g07770	Vir	14	0.214344	-0.0122154	0.156225	0.029034		-6.95521e-07	-0.00468474	1.21214e-05	1.64133e-07	8.16848e-07	0.0132755	3.02105e-05	1.2508e-06		bcin_chr_3:2,658,236..2,659,733(-)	Bcalo4	FAD/NAD(P)-binding domain;FAD/NAD(P)-binding domain superfamily	FAD/NAD(P)-binding domain		FAD/NAD(P)-binding domain superfamily			oxidoreductase activity	oxidation-reduction process	1.1.3.- (With oxygen as acceptor.)
326	Bcin03g07880	Spe	4	0.250846	0.019374	0.0480035	-0.0659823		1.47673e-06	0.00960147	1.1325e-05	1.66295e-07	-2.94211e-06	-0.0506303	5.81053e-05	3.69812e-06		bcin_chr_3:2,697,317..2,700,071(-)
327	Bcin03g07930	Vir	6	0.161494	0.0271903	0.133828	-0.0760234		1.00259e-06	0.00919252	1.395e-05	2.61112e-07	-1.67808e-06	-0.0259697	2.10702e-05	6.87182e-07		bcin_chr_3:2,723,387..2,725,751(+)	Bclhp1	RNA recognition motif domain;Lupus La protein;La-type HTH domain;RNA-binding domain superfamily;Winged helix DNA-binding domain superfamily	RNA recognition motif domain;La-type HTH domain	RNA recognition motif domain;La-type HTH domain	Winged helix DNA-binding domain superfamily;RNA-binding domain superfamily		nucleus;ribonucleoprotein complex	RNA binding;nucleic acid binding	RNA processing
328	Bcin03g07960	Vir	15	0.461053	-0.0018768	0.100127	0.0159276		-4.47642e-08	2.93218e-05	1.05533e-05	8.77835e-08	4.84493e-07	0.00336725	1.28561e-05	2.17265e-07		bcin_chr_3:2,733,918..2,737,072(-)	Bcmcm3	MCM domain;AAA+ ATPase domain;DNA replication licensing factor Mcm3;Nucleic acid-binding, OB-fold;Mini-chromosome maintenance, conserved site;P-loop containing nucleoside triphosphate hydrolase;MCM N-terminal domain;Mini-chromosome maintenance protein;MCM OB domain;MCM, AAA-lid domain	MCM domain;MCM N-terminal domain;MCM OB domain;MCM, AAA-lid domain	Mini-chromosome maintenance protein;AAA+ ATPase domain	Nucleic acid-binding, OB-fold;P-loop containing nucleoside triphosphate hydrolase		MCM complex;nucleus	ATP binding;DNA binding;DNA helicase activity	DNA replication;DNA replication initiation	3.6.4.12 (DNA helicase)
329	Bcin03g07980	Vir	12	0.509806	0.00860379	0.343907	-0.0196364		6.69254e-07	0.00325432	1.60667e-05	2.95671e-07	-7.07733e-07	-0.00576998	2.15439e-05	7.56484e-07		bcin_chr_3:2,740,008..2,743,088(+)	Bcsrv2	Adenylate cyclase-associated CAP;CARP motif;Adenylate cyclase-associated CAP, C-terminal;Adenylate cyclase-associated CAP, N-terminal;CAP, conserved site, N-terminal;Adenylyl cyclase-associated protein CAP, fungal type;Adenylate cyclase-associated CAP, N-terminal domain superfamily;Adenylate cyclase-associated CAP, C-terminal superfamily	Adenylate cyclase-associated CAP, N-terminal;Adenylate cyclase-associated CAP, C-terminal	CARP motif	Adenylate cyclase-associated CAP, N-terminal domain superfamily;Adenylate cyclase-associated CAP, C-terminal superfamily			actin binding	actin filament organization;cell morphogenesis;cytoskeleton organization
330	Bcin03g08010	Spe	12	0.328756	0.00618672	0.177838	-0.0343654		-4.98124e-07	-0.00142733	2.27917e-05	7.21107e-07	-2.03269e-07	-0.00526322	1.25351e-05	1.52196e-07		bcin_chr_3:2,749,973..2,752,994(+)		Heat shock protein 70 family;ATPase, nucleotide binding domain	Heat shock protein 70 family		ATPase, nucleotide binding domain			ATP binding
331	Bcin03g08020	Vir	15	0.171328	-0.00891305	0.285764	0.0102017		-8.23992e-07	-0.00660217	1.12733e-05	2.25011e-07	6.52012e-07	0.00767036	1.77053e-05	5.71259e-07		bcin_chr_3:2,753,336..2,754,699(-)		GNAT domain;Acyl-CoA N-acyltransferase	GNAT domain		Acyl-CoA N-acyltransferase			N-acetyltransferase activity		2.3.1.- (Transferring groups other than amino-acyl groups.)
332	Bcin03g08290	Vir	26	0.298066	-0.000465111	0.208584	0.0178876		2.17061e-07	0.0022049	1.03654e-05	1.08145e-07	7.51603e-07	0.00768478	2.57126e-05	1.38544e-06		bcin_chr_3:2,839,481..2,843,461(+)
333	Bcin03g08310	SpeVir	36	0.567467	-0.000654231	0.159267	0.00378814		-4.85995e-07	-0.0027852	1.76306e-05	4.10308e-07	6.24252e-07	0.00676965	2.37836e-05	9.11079e-07		bcin_chr_3:2,848,614..2,849,807(+)
334	Bcin03g08390	Vir	48	0.316447	-0.0103495	0.213512	0.0123557		-1.13487e-06	-0.00778215	2.01229e-05	5.49157e-07	6.02143e-07	0.00374437	2.80965e-05	1.70576e-06		bcin_chr_3:2,877,422..2,878,401(-)
335	Bcin03g08470	Vir	13	0.708116	0.00593674	0.172716	-0.0145482		-3.89828e-07	-0.000621753	1.13462e-05	1.13821e-07	5.05535e-07	0.00404234	8.68016e-06	1.16342e-07		bcin_chr_3:2,899,236..2,900,696(-)
336	Bcin03g08490	Spe	17	0.359364	-0.00209455	0.127535	0.00962279		1.75457e-07	0.00198591	1.19765e-05	1.5396e-07	-4.8256e-08	0.00372241	1.9226e-05	6.61845e-07		bcin_chr_3:2,906,607..2,910,801(-)		Protein kinase domain;Serine/threonine-protein kinase, active site;Protein kinase-like domain superfamily;Mad3/Bub1 homology region 2;Mad3/Bub1 homology region 1;Mitotic spindle checkpoint protein Bub1/Mad3	Protein kinase domain;Mad3/Bub1 homology region 2;Mad3/Bub1 homology region 1	Protein kinase domain;Mad3/Bub1 homology region 1	Protein kinase-like domain superfamily			ATP binding;protein kinase activity	mitotic spindle assembly checkpoint;protein phosphorylation	2.7.11.1 (Non-specific serine/threonine protein kinase)
337	Bcin03g08530	Spe	54	0.274772	-0.0111835	0.0801655	0.0412276		3.57561e-07	0.00156174	1.40278e-05	2.90943e-07	4.72156e-07	0.00620729	1.32885e-05	2.53483e-07		bcin_chr_3:2,916,915..2,920,202(+)		ATPase, AAA-type, core;P-loop containing nucleoside triphosphate hydrolase	ATPase, AAA-type, core		P-loop containing nucleoside triphosphate hydrolase			ATP binding
338	Bcin03g08550	SpeVir	26	0.294554	-0.00152766	0.18915	-0.00389123		-5.94794e-07	-0.00521952	2.59615e-05	8.11972e-07	-1.16368e-07	-0.0032673	2.33482e-05	1.09398e-06		bcin_chr_3:2,923,062..2,923,812(-)
339	Bcin03g08570	Spe	16	0.351273	0.0131563	0.0616192	-0.000816606		2.12362e-06	0.0212796	3.43312e-05	1.27189e-06	-1.03326e-06	-0.0115988	1.54013e-05	3.92991e-07		bcin_chr_3:2,926,971..2,928,739(+)	Bcnde4	FAD/NAD(P)-binding domain;FAD/NAD(P)-binding domain superfamily	FAD/NAD(P)-binding domain		FAD/NAD(P)-binding domain superfamily			oxidoreductase activity	oxidation-reduction process	1.6.5.9 (NADH:ubiquinone reductase (non-electrogenic))
340	Bcin03g08580	Spe	50	0.469907	0.00307223	0.130884	0.0308189		1.77599e-06	0.014672	3.4642e-05	1.31907e-06	-8.62501e-07	-0.00651483	1.31937e-05	2.28478e-07		bcin_chr_3:2,929,094..2,934,456(-)		SNF2-related, N-terminal domain;Helicase, C-terminal;P-loop containing nucleoside triphosphate hydrolase	SNF2-related, N-terminal domain;Helicase, C-terminal		P-loop containing nucleoside triphosphate hydrolase		nucleus	ATP binding;DNA binding;hydrolase activity		3.6.4.- (Acting on ATP; involved in cellular and subcellular movement.)
341	Bcin03g08660	Spe	16	0.322849	-0.00698367	0.203021	0.0301119		1.99309e-07	0.00102435	1.5625e-05	3.06504e-07	7.25585e-07	0.00802312	1.34079e-05	2.35607e-07		bcin_chr_3:2,958,644..2,962,566(-)		Cullin, N-terminal;Cullin homology domain;Cullin repeat-like-containing domain superfamily;Cullin protein, neddylation domain;Cullin homology domain superfamily;Winged helix DNA-binding domain superfamily	Cullin, N-terminal;Cullin protein, neddylation domain	Cullin homology domain;Cullin protein, neddylation domain	Winged helix DNA-binding domain superfamily;Cullin repeat-like-containing domain superfamily;Cullin homology domain superfamily			ubiquitin protein ligase binding	ubiquitin-dependent protein catabolic process
342	Bcin03g08770	Spe	15	0.0813353	-0.0294862	0.0645088	0.045406		-1.83189e-06	-0.0131065	7.92267e-05	3.82514e-06	1.74551e-06	0.0147453	1.77123e-05	4.94974e-07		bcin_chr_3:2,994,866..2,997,067(-)
343	Bcin03g08780	Vir	18	0.0871062	-0.0336454	0.138685	0.0559114		-2.02666e-06	-0.0148761	2.18556e-05	5.31111e-07	2.31608e-06	0.0219153	2.50526e-05	9.14301e-07		bcin_chr_3:2,997,164..2,999,345(+)		Zinc finger C2H2-type;Zinc finger C2H2 superfamily	Zinc finger C2H2-type	Zinc finger C2H2-type	Zinc finger C2H2 superfamily
344	Bcin03g08830	Vir	43	0.513516	0.00715141	0.245873	-0.0244908		-1.18001e-07	4.71098e-06	1.54581e-05	2.97713e-07	-2.03342e-07	-0.00254374	1.98335e-05	7.29917e-07		bcin_chr_3:3,016,800..3,019,336(+)	Bctep1	Dual specificity phosphatase, catalytic domain;Protein-tyrosine phosphatase, active site;Protein-tyrosine phosphatase-like	Dual specificity phosphatase, catalytic domain		Protein-tyrosine phosphatase-like			protein tyrosine phosphatase activity;protein tyrosine/serine/threonine phosphatase activity	dephosphorylation	3.1.3.67 (Phosphatidylinositol-3,4,5-trisphosphate 3-phosphatase)
345	Bcin03g08840	SpeVir	21	0.378617	0.00714646	0.141505	-0.00457757		8.34105e-07	0.00750273	2.47952e-05	8.46718e-07	-7.42032e-07	-0.00784135	2.44561e-05	9.6344e-07		bcin_chr_3:3,020,112..3,023,124(-)							integral component of membrane
346	Bcin03g08870	Vir	26	0.193019	0.0155302	0.150274	-0.0148395		1.04892e-06	0.00598054	1.58808e-05	3.68643e-07	-4.87803e-07	0.00188685	1.67733e-05	5.82083e-07		bcin_chr_3:3,031,776..3,033,132(+)		BTB/POZ domain;SKP1/BTB/POZ domain superfamily	BTB/POZ domain	BTB/POZ domain	SKP1/BTB/POZ domain superfamily			protein binding
347	Bcin03g08900	Spe	84	0.448258	-0.00372196	0.21606	0.00496501		-4.69425e-07	-0.00263136	1.41667e-05	2.84243e-07	2.57343e-07	0.00428098	1.57256e-05	5.05381e-07		bcin_chr_3:3,039,425..3,044,206(-)
348	Bcin03g08940	Spe	33	0.061458	0.0166124	0.163034	-0.0202019		1.81178e-06	0.0138535	3.0797e-05	9.8349e-07	-4.62028e-07	-0.00337431	1.05423e-05	1.42603e-07		bcin_chr_3:3,059,347..3,060,547(+)
349	Bcin03g09090	SpeVir	8	0.123125	-0.0267767	0.000958529	0.0693393		-8.1742e-07	-0.00375438	1.265e-05	2.46519e-07	1.9355e-06	0.0236819	4.86579e-05	2.30678e-06		bcin_chr_3:3,107,171..3,109,333(-)
350	Bcin04g00030	Vir	15	0.317173	0.000752523	0.284143	0.000824769		2.33424e-07	0.000837319	1.228e-05	1.52906e-07	2.74252e-08	-0.0015632	1.75228e-05	4.48157e-07		bcin_chr_4:21,142..23,728(-)		Glucoamylase;Glucoamylase, starch-binding;Six-hairpin glycosidase superfamily;GH15-like domain	GH15-like domain		Six-hairpin glycosidase superfamily			catalytic activity;glucan 1,4-alpha-glucosidase activity;starch binding	polysaccharide catabolic process;polysaccharide metabolic process	3.2.1.3 (Glucan 1,4-alpha-glucosidase)
351	Bcin04g00180	Vir	8	0.306147	0.00943238	0.102192	-0.00677116		9.51383e-07	0.00602631	1.00875e-05	1.249e-07	-6.53786e-07	-0.00923825	4.01053e-05	1.64424e-06		bcin_chr_4:70,846..72,085(+)										2.1.1.43 (Transferred entry: 2.1.1.354)
352	Bcin04g00220	Vir	5	0.236024	-0.00739871	0.0467089	0.0212903		-4.32675e-07	-0.00435172	1.348e-05	1.83627e-07	6.34572e-07	-0.00286147	4.64842e-05	2.71407e-06		bcin_chr_4:83,841..85,430(+)		Trafficking protein particle complex subunit 2;Longin-like domain superfamily	Trafficking protein particle complex subunit 2		Longin-like domain superfamily		cytoplasm		endoplasmic reticulum to Golgi vesicle-mediated transport	3.4.24.- (Metalloendopeptidases.)
353	Bcin04g00310	Vir	18	0.309582	0.0141286	0.0987728	-0.0236732		1.10155e-06	0.00664118	1.30333e-05	1.86501e-07	-7.98926e-07	-0.00663691	1.21813e-05	2.40894e-07		bcin_chr_4:123,269..123,890(+)		SUI1 domain;Eukaryotic translation initiation factor SUI1;SUI1 domain superfamily	SUI1 domain		SUI1 domain superfamily		ribosome	translation initiation factor activity	translational initiation
354	Bcin04g00330	Vir	7	0.534124	0.00801569	0.134747	0.0427707		1.40611e-06	0.0096793	1.26714e-05	1.58132e-07	1.76696e-06	0.0166575	1.80451e-05	4.21237e-07		bcin_chr_4:129,231..131,963(-)	Bcpct1	Cytidyltransferase-like domain;CTP:phosphocholine cytidylyltransferase domain	Cytidyltransferase-like domain			Cytidyltransferase-like domain		catalytic activity	biosynthetic process;phospholipid biosynthetic process	2.7.7.15 (Choline-phosphate cytidylyltransferase)
355	Bcin04g00350	Vir	3	0.0909176	-0.0295414	0.000115753	0.0951754		9.92008e-10	0.00203242	1.36333e-05	1.18243e-07	2.61716e-06	0.0306266	3.76842e-05	1.74746e-06		bcin_chr_4:137,776..138,749(+)							integral component of membrane
356	Bcin04g00370	Vir	5	0.154436	-0.00706146	0.0671128	0.0320042		4.363e-08	0.000949823	1.542e-05	2.35809e-07	1.078e-06	0.00708154	1.55789e-05	3.65437e-07		bcin_chr_4:145,941..150,173(-)		Protein AHC1					Ada2/Gcn5/Ada3 transcription activator complex
357	Bcin04g00420	SpeVir	35	0.250562	-0.00775775	0.111541	0.00853307		-7.84623e-07	-0.00408908	1.52457e-05	2.97785e-07	7.79575e-07	0.00784858	2.84812e-05	1.1667e-06		bcin_chr_4:163,007..165,858(-)		Glycoside hydrolase family 71	Glycoside hydrolase family 71					hydrolase activity		3.2.1.- (Glycosidases, i.e. enzymes hydrolyzing O- and S-glycosyl compounds.)
358	Bcin04g00480	Vir	22	0.273087	-0.0134952	0.044225	0.064172		2.54304e-07	0.000972579	1.09318e-05	9.70893e-08	2.00242e-06	0.0236746	3.12632e-05	1.41106e-06		bcin_chr_4:179,022..180,306(-)
359	Bcin04g00560	Vir	16	0.530175	0.00162585	0.139055	-0.00360824		-5.42804e-08	0.000247865	9.39375e-06	6.53636e-08	-2.59204e-08	0.00176589	1.41118e-05	3.26755e-07		bcin_chr_4:210,179..211,289(+)		NADH dehydrogenase [ubiquinone] (complex I), 21kDa subunit, fungi								1.6.99.3 (Deleted entry)
360	Bcin04g00570	Vir	14	0.385778	4.83744e-05	0.13615	0.0080735		1.80509e-08	0.00073199	1.23357e-05	1.78795e-07	7.18088e-07	0.00675994	2.82406e-05	1.11266e-06		bcin_chr_4:214,534..216,674(-)	Bcprx1	Alkyl hydroperoxide reductase subunit C/ Thiol specific antioxidant;Thioredoxin-like superfamily	Alkyl hydroperoxide reductase subunit C/ Thiol specific antioxidant		Thioredoxin-like superfamily			antioxidant activity;oxidoreductase activity	oxidation-reduction process	1.11.1.15 (Transferred entry: 1.11.1.24)
361	Bcin04g00640	Vir	297	0.652865	0.000495818	0.238685	0.0124825		3.47421e-07	0.00321367	1.37296e-05	2.45685e-07	2.38719e-07	0.00130427	1.36374e-05	2.59278e-07		bcin_chr_4:237,643..246,603(+)	Bcpks20	Thioesterase;Phosphopantetheine attachment site;Phosphopantetheine binding ACP domain;Methyltransferase type 12;Polyketide synthase, ketoreductase domain;Beta-ketoacyl synthase, N-terminal;Beta-ketoacyl synthase, C-terminal;Acyl transferase;Acyl transferase/acyl hydrolase/lysophospholipase;Thiolase-like;Beta-ketoacyl synthase, active site;Polyketide synthase, acyl transferase domain;Polyketide sy…	Beta-ketoacyl synthase, N-terminal;Phosphopantetheine binding ACP domain;Acyl transferase;Thioesterase;Beta-ketoacyl synthase, C-terminal;Methyltransferase type 12;Polyketide synthase, ketoreductase domain;Polyketide synthase, dehydratase domain;Methyltransferase, fungal type, helix-turn-helix domain	Polyketide synthase, beta-ketoacyl synthase domain;Polyketide synthase, acyl transferase domain	ACP-like superfamily;NAD(P)-binding domain superfamily;Acyl transferase/acyl hydrolase/lysophospholipase;S-adenosyl-L-methionine-dependent methyltransferase;Alpha/Beta hydrolase fold;Thiolase-like			catalytic activity;hydrolase activity, acting on ester bonds;methyltransferase activity;transferase activity	biosynthetic process;methylation	2.3.1.- (Transferring groups other than amino-acyl groups.)
362	Bcin04g00730	Vir	96	0.210224	0.000572315	0.102712	0.00470161		1.73218e-07	0.00135247	1.52354e-05	3.11034e-07	6.78014e-08	0.000903218	2.09221e-05	6.48435e-07		bcin_chr_4:269,500..271,004(+)		Tetratricopeptide-like helical domain superfamily;Tetratricopeptide repeat		Tetratricopeptide repeat	Tetratricopeptide-like helical domain superfamily			protein binding
363	Bcin04g00740	Vir	208	0.463333	-0.00086828	0.24586	-0.0120957		-5.71022e-07	-0.0015875	1.38913e-05	2.52518e-07	-2.34035e-07	-0.00140042	1.00962e-05	1.14005e-07		bcin_chr_4:272,835..277,043(-)		Ankyrin repeat;Heterokaryon incompatibility;Ankyrin repeat-containing domain;Ankyrin repeat-containing domain superfamily	Heterokaryon incompatibility;Ankyrin repeat-containing domain	Ankyrin repeat	Ankyrin repeat-containing domain superfamily			protein binding		3.4.21.72 (IgA-specific serine endopeptidase)
364	Bcin04g00750	Vir	51	0.267654	0.00808433	0.123493	-0.0166877		4.1018e-07	0.00318184	1.57784e-05	2.76431e-07	-4.98883e-07	-0.00286423	1.61548e-05	3.87012e-07		bcin_chr_4:281,040..285,313(+)		P-type ATPase;Cation-transporting P-type ATPase, N-terminal;P-type ATPase, subfamily IIIA;P-type ATPase, A domain superfamily;P-type ATPase, phosphorylation site;P-type ATPase, transmembrane domain superfamily;HAD-like superfamily	Cation-transporting P-type ATPase, N-terminal	Cation-transporting P-type ATPase, N-terminal	HAD-like superfamily;P-type ATPase, A domain superfamily;P-type ATPase, transmembrane domain superfamily	P-type ATPase;P-type ATPase, subfamily IIIA	integral component of membrane;plasma membrane	ATP binding;nucleotide binding;proton-exporting ATPase activity, phosphorylative mechanism	proton export across plasma membrane	7.1.2.1 (P-type H(+)-exporting transporter)
365	Bcin04g00760	Vir	51	0.506683	0.00119641	0.115036	-0.0147476		-5.14733e-08	0.000160275	1.03804e-05	1.21484e-07	-4.63504e-07	-0.00292345	1.71744e-05	4.72175e-07		bcin_chr_4:285,625..288,926(-)	Bcfaa2	AMP-dependent synthetase/ligase;AMP-binding, conserved site	AMP-dependent synthetase/ligase					catalytic activity		6.2.1.3 (Long-chain-fatty-acid--CoA ligase)
366	Bcin04g00820	SpeVir	47	0.417238	-0.0034527	0.23457	-0.00603768		-9.8217e-08	-0.00141477	1.86404e-05	4.61444e-07	-7.38957e-07	-0.00600684	1.92856e-05	5.76189e-07		bcin_chr_4:307,407..308,594(+)							integral component of membrane
367	Bcin04g00830	SpeVir	113	0.426859	-0.00162265	0.278226	-0.00422288		-3.40936e-07	-0.0018878	1.28796e-05	2.09845e-07	2.09299e-07	0.00210309	1.45822e-05	3.53152e-07		bcin_chr_4:310,912..316,030(-)		WD40 repeat;NACHT nucleoside triphosphatase;WD40 repeat, conserved site;G-protein beta WD-40 repeat;P-loop containing nucleoside triphosphate hydrolase;NWD NACHT-NTPase, N-terminal;WD40-repeat-containing domain superfamily	WD40 repeat;NACHT nucleoside triphosphatase;NWD NACHT-NTPase, N-terminal	WD40 repeat	WD40-repeat-containing domain superfamily;P-loop containing nucleoside triphosphate hydrolase			protein binding
368	Bcin04g00840	Vir	42	0.477452	-0.00154967	0.172319	0.00651284		-1.89619e-07	-0.000149771	1.01476e-05	9.70631e-08	6.12823e-07	0.00670287	2.42907e-05	8.3943e-07		bcin_chr_4:318,324..319,705(-)							integral component of membrane
369	Bcin04g00850	Vir	15	0.216655	-0.0140346	0.0923618	0.0321495		-3.0829e-07	-0.00118192	1.00733e-05	8.83485e-08	2.87916e-07	0.00156295	1.43789e-05	2.79532e-07		bcin_chr_4:320,191..320,746(+)
370	Bcin04g00860	Vir	22	0.326452	-0.000237989	0.125507	0.00904127		2.21974e-07	0.00185868	1.19364e-05	1.83703e-07	1.3425e-07	0.000520837	2.95024e-05	1.14504e-06		bcin_chr_4:320,934..323,262(+)
371	Bcin04g00910	Vir	52	0.512132	-0.000977465	0.192064	0.0022232		5.95371e-08	-0.000455413	1.285e-05	2.10306e-07	-5.65925e-08	-0.000417531	1.35648e-05	2.70458e-07		bcin_chr_4:339,418..341,389(-)							integral component of membrane
372	Bcin04g00930	Vir	157	0.342016	-0.0021609	0.129052	0.0132468		3.24911e-08	0.000673674	1.33115e-05	1.93755e-07	3.13967e-07	0.00374949	2.25558e-05	7.81644e-07		bcin_chr_4:349,197..353,621(-)		Ankyrin repeat;Heterokaryon incompatibility;Ankyrin repeat-containing domain;Ankyrin repeat-containing domain superfamily	Heterokaryon incompatibility;Ankyrin repeat-containing domain	Ankyrin repeat	Ankyrin repeat-containing domain superfamily			protein binding
373	Bcin04g00940	SpeVir	103	0.470796	-0.000301286	0.264757	-0.00387966		-3.46968e-07	-0.00161784	1.91922e-05	5.14566e-07	1.721e-07	0.00154483	1.58426e-05	3.99961e-07		bcin_chr_4:354,705..358,935(+)		NB-ARC;Tetratricopeptide-like helical domain superfamily;Tetratricopeptide repeat;P-loop containing nucleoside triphosphate hydrolase;NACHT-NTPase and P-loop NTPases, N-terminal domain	NB-ARC;NACHT-NTPase and P-loop NTPases, N-terminal domain	Tetratricopeptide repeat	Tetratricopeptide-like helical domain superfamily;P-loop containing nucleoside triphosphate hydrolase			ADP binding;protein binding
374	Bcin04g00950	Vir	138	0.514615	0.00391369	0.303995	-0.00520146		1.04914e-07	0.000273597	1.1921e-05	1.55773e-07	3.13597e-07	0.00314082	1.36468e-05	2.77769e-07		bcin_chr_4:359,484..363,907(+)		Ankyrin repeat;NACHT nucleoside triphosphatase;Ankyrin repeat-containing domain;P-loop containing nucleoside triphosphate hydrolase;NWD NACHT-NTPase, N-terminal;Ankyrin repeat-containing domain superfamily	NACHT nucleoside triphosphatase;Ankyrin repeat-containing domain;NWD NACHT-NTPase, N-terminal	Ankyrin repeat	Ankyrin repeat-containing domain superfamily;P-loop containing nucleoside triphosphate hydrolase			protein binding
375	Bcin04g00960	Vir	52	0.21829	0.00325081	0.161954	0.00756562		4.57824e-08	0.00366913	1.75596e-05	4.14138e-07	6.63683e-07	0.00695077	2.59899e-05	8.99414e-07		bcin_chr_4:372,947..378,934(-)		P-loop containing nucleoside triphosphate hydrolase;ATPase, nucleotide binding domain			P-loop containing nucleoside triphosphate hydrolase;ATPase, nucleotide binding domain
376	Bcin04g00970	Vir	26	0.240065	-0.00176028	0.08094	0.0169678		3.03766e-07	0.00192542	1.55115e-05	3.0052e-07	5.24634e-07	0.00718006	1.70162e-05	4.88321e-07		bcin_chr_4:379,064..380,977(+)
377	Bcin04g00980	Vir	228	0.321468	-0.00915573	0.124347	0.0139218		-5.93289e-07	-0.00401424	1.2207e-05	1.68376e-07	2.80646e-07	0.00289112	1.20217e-05	2.12303e-07		bcin_chr_4:387,818..391,292(+)		WD40 repeat;NACHT nucleoside triphosphatase;Heterokaryon incompatibility;WD40 repeat, conserved site;P-loop containing nucleoside triphosphate hydrolase;WD40-repeat-containing domain superfamily	WD40 repeat;NACHT nucleoside triphosphatase;Heterokaryon incompatibility	WD40 repeat	WD40-repeat-containing domain superfamily;P-loop containing nucleoside triphosphate hydrolase			protein binding
378	Bcin04g01010	SpeVir	66	0.344972	-0.00208232	0.146694	0.00967426		3.05396e-08	-0.000628854	1.24773e-05	2.01689e-07	3.03216e-07	0.00416953	1.35391e-05	3.01698e-07		bcin_chr_4:400,780..401,578(+)
379	Bcin04g01020	SpeVir	142	0.397643	-0.0002578	0.20096	0.00264634		3.16867e-07	0.00194889	1.66268e-05	3.88113e-07	-5.05904e-07	-0.00381871	5.53543e-05	4.09013e-06		bcin_chr_4:403,358..407,303(-)		WD40 repeat;NACHT nucleoside triphosphatase;WD40 repeat, conserved site;G-protein beta WD-40 repeat;P-loop containing nucleoside triphosphate hydrolase;WD40-repeat-containing domain superfamily	WD40 repeat;NACHT nucleoside triphosphatase	WD40 repeat	WD40-repeat-containing domain superfamily;P-loop containing nucleoside triphosphate hydrolase			protein binding
380	Bcin04g01030	Vir	16	0.465007	-0.00788644	0.160966	0.0101887		-3.3745e-07	-0.00293044	9.41875e-06	7.82909e-08	-6.43948e-08	0.000492729	1.23289e-05	2.18404e-07		bcin_chr_4:408,858..415,388(-)		MIT;MIT domain superfamily	MIT		MIT domain superfamily
381	Bcin04g01040	Vir	46	0.355381	0.00102793	0.140696	0.000892647		2.57668e-07	0.00117804	1.26109e-05	2.02134e-07	-1.35669e-07	-0.000399325	1.66659e-05	4.06516e-07		bcin_chr_4:418,519..423,239(+)	Bcoxp1	Hydantoinase A/oxoprolinase;Hydantoinase B/oxoprolinase;Hydantoinaseoxoprolinase, N-terminal	Hydantoinase A/oxoprolinase;Hydantoinase B/oxoprolinase;Hydantoinaseoxoprolinase, N-terminal					catalytic activity;hydrolase activity		3.5.2.9 (5-oxoprolinase (ATP-hydrolyzing))
382	Bcin04g01090	Vir	83	0.541897	-0.00218497	0.132509	-0.00119133		5.08619e-08	0.000176247	1.1288e-05	1.3723e-07	-4.11003e-07	-0.00402942	1.72124e-05	5.03612e-07		bcin_chr_4:434,741..439,937(-)		Ankyrin repeat;Ankyrin repeat-containing domain;Ankyrin repeat-containing domain superfamily	Ankyrin repeat;Ankyrin repeat-containing domain	Ankyrin repeat	Ankyrin repeat-containing domain superfamily		integral component of membrane	protein binding		3.4.21.72 (IgA-specific serine endopeptidase)
383	Bcin04g01130	Vir	8	0.234049	-0.0157826	0.00120455	0.0576948		-6.8159e-07	-0.00449489	1.14e-05	1.79424e-07	1.73261e-06	0.0229238	4.37895e-05	2.15491e-06		bcin_chr_4:456,241..458,115(-)		RNA recognition motif domain;Srp1, RNA recognition motif;RNA-binding domain superfamily	RNA recognition motif domain	RNA recognition motif domain	RNA-binding domain superfamily			RNA binding;nucleic acid binding
384	Bcin04g01160	Vir	16	0.506677	-0.00979284	0.0475647	0.0212792		-3.11288e-07	-0.00131284	1.10812e-05	9.30518e-08	1.86451e-07	0.0027874	1.11184e-05	1.49696e-07		bcin_chr_4:464,827..467,376(+)
385	Bcin04g01200	Vir	21	0.298191	0.000623048	0.124626	0.0181616		9.56326e-07	0.00625993	1.45571e-05	3.0591e-07	-4.61167e-07	-0.002349	1.34586e-05	2.59319e-07		bcin_chr_4:474,097..476,471(-)		Methyltransferase type 11;Sterol methyltransferase C-terminal;S-adenosyl-L-methionine-dependent methyltransferase	Methyltransferase type 11;Sterol methyltransferase C-terminal		S-adenosyl-L-methionine-dependent methyltransferase			methyltransferase activity;sterol 24-C-methyltransferase activity	methylation;steroid biosynthetic process;sterol biosynthetic process	2.1.1.41 (Sterol 24-C-methyltransferase)
386	Bcin04g01220	Vir	12	0.351938	-0.0209951	0.00214919	0.0800203		7.39884e-07	0.00398933	1.22667e-05	1.42183e-07	6.05544e-07	0.00845561	1.07632e-05	1.80871e-07		bcin_chr_4:478,784..479,913(+)
387	Bcin04g01280	Vir	10	0.459848	0.00355388	0.0573643	-0.00247787		1.40433e-07	0.000972961	9.33e-06	7.89986e-08	3.29089e-07	0.00610042	1.84421e-05	5.76483e-07		bcin_chr_4:495,083..496,099(+)	Bcqcr7	Cytochrome b-c1 complex subunit 7;Cytochrome b-c1 complex subunit 7 superfamily	Cytochrome b-c1 complex subunit 7		Cytochrome b-c1 complex subunit 7 superfamily		mitochondrial respiratory chain complex III		mitochondrial electron transport, ubiquinol to cytochrome c	1.10.2.2 (Transferred entry: 7.1.1.8)
388	Bcin04g01400	Vir	17	0.425481	-0.00420485	0.100998	0.0130152		-2.91062e-07	-0.00244545	1.18471e-05	1.75434e-07	1.9665e-07	0.00950264	2.73994e-05	1.6145e-06		bcin_chr_4:533,921..535,708(-)		Short-chain dehydrogenase/reductase SDR;NAD(P)-binding domain superfamily			NAD(P)-binding domain superfamily
389	Bcin04g01430	Spe	9	0.310607	0.0207168	0.125566	-0.0340536		1.70375e-06	0.0124246	4.10333e-05	1.53463e-06	-1.04024e-06	-0.00786102	1.13099e-05	2.3353e-07		bcin_chr_4:545,574..547,373(-)
390	Bcin04g01650	Vir	14	0.302501	0.0181883	0.2872	-0.0293792		6.81195e-07	0.00548306	2.04357e-05	6.56082e-07	-3.00409e-07	-0.00354664	1.07594e-05	1.51456e-07		bcin_chr_4:605,290..610,288(-)		Transcription factor domain, fungi;Zinc finger C2H2-type;Zinc finger C2H2 superfamily	Zinc finger C2H2-type;Transcription factor domain, fungi	Zinc finger C2H2-type	Zinc finger C2H2 superfamily		nucleus	DNA binding;zinc ion binding	transcription, DNA-templated
391	Bcin04g02140	SpeVir	13	0.205041	-0.00993674	0.27839	0.00596228		-9.25323e-07	-0.00623613	2.2e-05	6.37795e-07	4.44595e-07	0.00326064	2.02186e-05	6.44777e-07		bcin_chr_4:821,010..822,234(+)	Bcalg14	Oligosaccharide biosynthesis protein Alg14-like	Oligosaccharide biosynthesis protein Alg14-like				endoplasmic reticulum membrane;integral component of membrane;nuclear membrane		dolichol-linked oligosaccharide biosynthetic process	2.4.1.141 (N-acetylglucosaminyldiphosphodolichol N-acetylglucosaminyltransferase)
392	Bcin04g02540	Vir	12	0.334983	-0.0093728	0.135235	0.0358583		-1.04156e-07	-0.001162	1.10167e-05	1.10852e-07	6.26504e-07	0.00826554	1.22368e-05	2.2312e-07		bcin_chr_4:921,700..925,669(-)		Bestrophin/UPF0187	Bestrophin/UPF0187				integral component of membrane
393	Bcin04g02550	Vir	20	0.183055	0.00883651	0.157408	-0.0190685		5.93718e-07	0.00382237	1.6615e-05	3.25456e-07	-6.38699e-07	-0.00327535	1.34368e-05	2.31758e-07		bcin_chr_4:932,483..934,058(-)
394	Bcin04g02580	Vir	52	0.256751	0.00325115	0.141894	-0.00569744		1.5446e-07	0.000755929	1.41231e-05	2.61668e-07	-1.66557e-07	-0.00178382	1.14757e-05	1.61628e-07		bcin_chr_4:939,720..941,735(+)
395	Bcin04g02620	Vir	21	0.217451	-0.00679485	0.410315	-0.00318725		-1.0106e-06	-0.0122674	1.97571e-05	5.57396e-07	5.61005e-07	0.00466949	1.48421e-05	3.70437e-07		bcin_chr_4:948,835..949,517(+)
396	Bcin04g02690	Spe	25	0.232678	0.0228024	0.139099	0.000315035		2.8448e-06	0.0265028	0.000101956	5.49304e-06	-1.38193e-06	-0.00955184	1.38232e-05	2.71008e-07		bcin_chr_4:964,500..966,541(+)
397	Bcin04g02830	Vir	10	0.0541804	-0.0375658	0.0647918	0.0830343		-1.12336e-06	-0.0123301	1.274e-05	2.15801e-07	1.18614e-06	0.0192879	1.97895e-05	9.16091e-07		bcin_chr_4:1,005,594..1,007,345(-)
398	Bcin04g02860	Vir	26	0.263158	-0.023531	0.104908	0.0647525		-1.27074e-07	-0.00247954	1.14654e-05	1.12221e-07	2.38045e-07	0.0059105	1.74089e-05	5.15079e-07		bcin_chr_4:1,013,660..1,014,735(+)
399	Bcin04g02900	Vir	17	0.176887	-0.017608	0.132879	0.0601504		-5.22866e-07	-0.00517482	1.17588e-05	2.13515e-07	1.76158e-06	0.0228266	2.34303e-05	8.89166e-07		bcin_chr_4:1,045,567..1,047,037(+)
400	Bcin04g02930	Vir	44	0.19244	0.0167827	0.0411667	-0.0274026		1.21066e-06	0.00682071	1.30727e-05	2.43707e-07	-1.12469e-06	-0.00599187	1.45622e-05	3.04561e-07		bcin_chr_4:1,051,120..1,055,906(-)	Bmr5	ABC transporter-like;AAA+ ATPase domain;CDR ABC transporter;ABC-2 type transporter;ABC transporter, conserved site;P-loop containing nucleoside triphosphate hydrolase;ABC-transporter N-terminal domain;ATP-binding cassette transporter, PDR-like subfamily G, domain 1;ATP-binding cassette transporter, PDR-like subfamily G, domain 2	ABC transporter-like;ABC-2 type transporter;CDR ABC transporter;ABC-transporter N-terminal domain	AAA+ ATPase domain	P-loop containing nucleoside triphosphate hydrolase		integral component of membrane;membrane	ATP binding;ATPase activity;ATPase-coupled transmembrane transporter activity	transmembrane transport	3.6.3.28 (Transferred entry: 7.3.2.2)
401	Bcin04g03190	Vir	9	0.0521237	-0.0354883	0.00049317	0.095385		-4.13012e-07	-0.00477437	1.21444e-05	1.5261e-07	4.42345e-07	0.00619477	1.07953e-05	1.60414e-07		bcin_chr_4:1,150,017..1,157,335(-)										2.2.1.2 (Transaldolase)
402	Bcin04g03290	Spe	4	0.262959	-0.0198221	0.0607879	0.060581		4.69979e-08	-0.000528753	1.3275e-05	1.18619e-07	-9.19271e-09	0.00326673	1.06316e-05	1.26935e-07		bcin_chr_4:1,189,427..1,192,174(-)		Heat shock protein 70 family;ATPase, nucleotide binding domain	Heat shock protein 70 family		ATPase, nucleotide binding domain			ATP binding
403	Bcin04g04440	Spe	4	0.326534	-0.015304	0.191346	0.0283775		-9.03024e-07	-0.00546622	1.215e-05	1.63756e-07	4.13498e-07	0.0117303	2.2e-05	6.89259e-07		bcin_chr_4:1,555,477..1,557,095(-)		Fatty acid desaturase domain;Sphingolipid delta4-desaturase;Sphingolipid delta4-desaturase, N-terminal	Fatty acid desaturase domain;Sphingolipid delta4-desaturase, N-terminal	Sphingolipid delta4-desaturase, N-terminal			integral component of membrane	sphingolipid delta-4 desaturase activity	lipid metabolic process;sphingolipid biosynthetic process	1.14.19.17 (Sphingolipid 4-desaturase)
404	Bcin04g04530	Vir	16	0.163107	-0.0111313	0.0739734	0.0392299		2.54737e-07	1.39427e-05	1.405e-05	2.5926e-07	1.77794e-07	0.00712107	1.34737e-05	3.10676e-07		bcin_chr_4:1,579,032..1,580,101(-)
405	Bcin04g04600	Vir	8	0.415411	0.00853677	0.102626	-0.0156098		2.60954e-07	0.00474979	2.08375e-05	5.19772e-07	-3.66433e-07	-0.0020571	1.15526e-05	1.06972e-07		bcin_chr_4:1,599,239..1,601,278(-)	Bcyhc3	Batten's disease protein Cln3;Batten's disease protein Cln3, subgroup;MFS transporter superfamily	Batten's disease protein Cln3		MFS transporter superfamily		integral component of membrane;membrane;vacuolar membrane		amino acid transport
406	Bcin04g05570	Vir	6	0.284754	0.000526996	0.174087	0.0176525		-5.30928e-07	-0.00568312	1.15167e-05	1.60384e-07	1.27814e-06	0.0207688	3.35789e-05	1.76327e-06		bcin_chr_4:1,935,511..1,937,240(-)
407	Bcin04g06060	Vir	36	0.164973	-0.0156935	0.0645718	0.0353664		-4.89216e-07	-0.00399252	1.31639e-05	1.89994e-07	1.12134e-06	0.0167527	1.9386e-05	6.85177e-07		bcin_chr_4:2,092,405..2,096,991(-)		WD40-repeat-containing domain superfamily			WD40-repeat-containing domain superfamily			protein binding
408	Bcin04g06080	Vir	63	0.24715	-0.00649046	0.0972979	0.00885902		-4.05261e-07	-0.00280439	1.5573e-05	3.07785e-07	1.12273e-07	0.002291	1.41654e-05	2.53977e-07		bcin_chr_4:2,108,090..2,111,081(+)		Sugar/inositol transporter;Major facilitator, sugar transporter-like;Sugar transporter, conserved site;MFS transporter superfamily	Major facilitator, sugar transporter-like		MFS transporter superfamily	Sugar/inositol transporter	integral component of membrane;membrane	transmembrane transporter activity	transmembrane transport
409	Bcin04g06140	Spe	23	0.173276	0.0128967	0.154529	-0.0241558		8.76515e-07	0.00741172	6.05435e-05	3.13463e-06	-5.00524e-07	-0.00302799	1.09428e-05	1.3252e-07		bcin_chr_4:2,125,096..2,126,470(+)		Pyrroline-5-carboxylate reductase;6-phosphogluconate dehydrogenase-like, C-terminal domain superfamily;Pyrroline-5-carboxylate reductase, catalytic, N-terminal;Pyrroline-5-carboxylate reductase, dimerisation domain;NAD(P)-binding domain superfamily	Pyrroline-5-carboxylate reductase, catalytic, N-terminal;Pyrroline-5-carboxylate reductase, dimerisation domain		6-phosphogluconate dehydrogenase-like, C-terminal domain superfamily;NAD(P)-binding domain superfamily		integral component of membrane	pyrroline-5-carboxylate reductase activity	oxidation-reduction process;proline biosynthetic process	1.5.1.2 (Pyrroline-5-carboxylate reductase)
410	Bcin04g06150	Spe	10	0.230013	-0.000785225	0.249453	0.00507456		1.01876e-07	0.00131104	4.125e-05	1.92362e-06	1.01452e-07	0.0014869	1.04842e-05	1.87234e-07		bcin_chr_4:2,127,301..2,130,796(+)		Glycoside hydrolase, family 76;Six-hairpin glycosidase superfamily	Glycoside hydrolase, family 76		Six-hairpin glycosidase superfamily			catalytic activity		3.2.1.101 (Mannan endo-1,6-alpha-mannosidase)
411	Bcin04g06160	Spe	14	0.317688	0.00759528	0.136208	-0.00388205		1.31259e-06	0.00964536	3.71214e-05	1.37114e-06	-1.05065e-06	-0.00868458	1.23008e-05	2.11335e-07		bcin_chr_4:2,131,546..2,132,807(-)
412	Bcin04g06170	Spe	20	0.179077	-0.0122101	0.0904324	0.0195535		-9.39251e-07	-0.00792029	3.462e-05	1.37035e-06	7.15908e-07	0.00859972	1.08895e-05	1.75391e-07		bcin_chr_4:2,132,847..2,136,268(-)	Bcmlh3	MutL, C-terminal, dimerisation;DNA mismatch repair protein Mlh3;Histidine kinase/HSP90-like ATPase superfamily;MutL, C-terminal domain superfamily;DNA mismatch repair protein MutL/Mlh/Pms	MutL, C-terminal, dimerisation	MutL, C-terminal, dimerisation	MutL, C-terminal domain superfamily;Histidine kinase/HSP90-like ATPase superfamily		mismatch repair complex	ATP binding;ATPase activity	mismatch repair
413	Bcin04g06190	Spe	13	0.268017	-0.022403	0.102112	0.0457726		3.60679e-07	-0.00117639	2.23385e-05	6.46382e-07	-2.28567e-07	0.000255589	1.19676e-05	1.29157e-07		bcin_chr_4:2,139,385..2,142,007(+)		Carboxylesterase, type B;Carboxylesterase type B, active site;Alpha/Beta hydrolase fold	Carboxylesterase, type B		Alpha/Beta hydrolase fold			hydrolase activity		3.1.1.- (Carboxylic ester hydrolases.)
414	Bcin04g06200	Spe	58	0.118626	0.00804439	0.172511	-0.0114001		4.09587e-07	0.00522053	3.69397e-05	1.40937e-06	-2.20564e-07	-0.0011391	1.40544e-05	3.15256e-07		bcin_chr_4:2,142,169..2,144,611(+)		Glycosyltransferase, DXD sugar-binding motif;Nucleotide-diphospho-sugar transferases	Glycosyltransferase, DXD sugar-binding motif		Nucleotide-diphospho-sugar transferases		integral component of membrane			2.4.-.- (Glycosyltransferases.)
415	Bcin04g06210	Spe	25	0.263022	0.00899241	0.0767901	-0.0259689		5.46778e-07	0.00487018	3.2232e-05	1.16116e-06	-9.7549e-07	-0.0102855	1.85558e-05	5.45229e-07		bcin_chr_4:2,144,945..2,146,858(-)		Zn(2)-C6 fungal-type DNA-binding domain;Zn(2)-C6 fungal-type DNA-binding domain superfamily	Zn(2)-C6 fungal-type DNA-binding domain	Zn(2)-C6 fungal-type DNA-binding domain	Zn(2)-C6 fungal-type DNA-binding domain superfamily		host cell nucleus;nucleus	DNA-binding transcription factor activity, RNA polymerase II-specific;zinc ion binding	regulation of transcription, DNA-templated
416	Bcin04g06220	Spe	30	0.125406	0.00982108	0.183719	-0.0226355		1.63416e-07	0.000269534	1.30667e-05	2.2067e-07	4.23477e-07	0.00301988	1.23825e-05	2.00432e-07		bcin_chr_4:2,146,900..2,148,585(-)		Major facilitator superfamily;MFS transporter superfamily	Major facilitator superfamily		MFS transporter superfamily		integral component of membrane	transmembrane transporter activity	transmembrane transport
417	Bcin04g06230	Spe	13	0.235254	-0.00513305	0.0380141	0.0103797		2.13228e-07	-0.000263068	4.86846e-05	2.35918e-06	-1.85587e-07	0.00239969	1.50931e-05	3.22671e-07		bcin_chr_4:2,149,265..2,151,046(-)	Bcfhg1	Globin;Oxidoreductase FAD/NAD(P)-binding;Flavoprotein pyridine nucleotide cytochrome reductase-like, FAD-binding domain;Globin-like superfamily;Riboflavin synthase-like beta-barrel;Flavohemoprotein;Ferredoxin-NADP reductase (FNR), nucleotide-binding domain	Globin;Oxidoreductase FAD/NAD(P)-binding;Flavoprotein pyridine nucleotide cytochrome reductase-like, FAD-binding domain		Globin-like superfamily;Ferredoxin-NADP reductase (FNR), nucleotide-binding domain;Riboflavin synthase-like beta-barrel			FAD binding;heme binding;nitric oxide dioxygenase activity;oxidoreductase activity;oxygen binding	oxidation-reduction process;response to nitrosative stress	1.14.12.17 (Nitric oxide dioxygenase)
418	Bcin04g06240	Spe	14	0.214574	0.034656	0.0452905	-0.0291012		2.82577e-06	0.0220615	6.43643e-05	2.84225e-06	-1.11909e-06	-0.00673508	1.21654e-05	2.66654e-07		bcin_chr_4:2,151,197..2,152,580(+)		Nitronate monooxygenase	Nitronate monooxygenase					catalytic activity;nitronate monooxygenase activity	oxidation-reduction process	1.13.11.32 (Transferred entry: 1.13.12.16)
419	Bcin04g06250	Spe	24	0.288366	0.0151008	0.0586906	0.01855		2.61566e-06	0.0203143	3.535e-05	1.21886e-06	-1.04049e-06	-0.00474048	1.34649e-05	1.64323e-07		bcin_chr_4:2,153,010..2,154,949(+)		Glycosyl hydrolase, family 13, catalytic domain;Alpha-amylase-like;Alpha-amylase, domain of unknown function DUF1966, C-terminal;Glycoside hydrolase superfamily	Glycosyl hydrolase, family 13, catalytic domain;Alpha-amylase, domain of unknown function DUF1966, C-terminal	Glycosyl hydrolase, family 13, catalytic domain	Glycoside hydrolase superfamily			alpha-amylase activity;alpha-amylase activity (releasing maltohexaose);calcium ion binding;catalytic activity	carbohydrate catabolic process;carbohydrate metabolic process	3.2.1.1 (Alpha-amylase)
420	Bcin04g06260	Vir	19	0.23586	-0.0102238	0.0630142	0.0143736		-6.9822e-07	-0.00586996	1.33e-05	2.29962e-07	4.25325e-07	0.00675061	2.01884e-05	6.43053e-07		bcin_chr_4:2,154,989..2,156,266(-)
421	Bcin04g06340	Spe	20	0.498414	-0.00156274	0.0684849	0.030148		9.04257e-07	0.0082446	2.6235e-05	9.21231e-07	-4.34553e-08	0.00216557	1.34842e-05	2.60457e-07		bcin_chr_4:2,179,084..2,182,785(-)		Tetratricopeptide-like helical domain superfamily;Tetratricopeptide repeat;P-loop containing nucleoside triphosphate hydrolase		Tetratricopeptide repeat	Tetratricopeptide-like helical domain superfamily;P-loop containing nucleoside triphosphate hydrolase			protein binding
422	Bcin04g06350	Spe	13	0.382253	0.00155462	0.129379	0.00888019		7.08468e-07	0.00489547	2.99769e-05	1.17807e-06	1.75222e-07	0.0035217	1.86397e-05	5.3018e-07		bcin_chr_4:2,183,123..2,185,116(+)		Alpha/Beta hydrolase fold			Alpha/Beta hydrolase fold
423	Bcin04g06470	Spe	19	0.11051	0.0178046	0.127138	-0.0389826		5.84038e-07	0.00288178	5.55053e-05	2.34158e-06	-2.66875e-07	-0.00135721	9.74515e-06	8.99331e-08		bcin_chr_4:2,229,701..2,231,226(-)							integral component of membrane
424	Bcin04g06510	Spe	16	0.208293	-0.0142685	0.170238	0.0112067		-1.04235e-06	-0.00979846	2.3175e-05	6.76176e-07	4.97969e-07	0.00557624	1.23618e-05	1.77681e-07		bcin_chr_4:2,237,776..2,239,264(+)		Short-chain dehydrogenase/reductase SDR;NAD(P)-binding domain superfamily	Short-chain dehydrogenase/reductase SDR		NAD(P)-binding domain superfamily					1.3.1.33 (Protochlorophyllide reductase)
425	Bcin04g06540	Spe	8	0.349926	0.00993307	0.258253	-0.0228171		3.77186e-07	0.0038981	2.07875e-05	6.12819e-07	-1.31267e-07	0.00141597	1.02632e-05	1.64446e-07		bcin_chr_4:2,243,509..2,244,714(+)
426	Bcin04g06550	Spe	20	0.338845	-0.00797296	0.259822	-0.00548573		-7.57758e-07	-0.00520995	2.214e-05	7.08643e-07	-2.01466e-07	-0.00280642	1.22053e-05	1.97076e-07		bcin_chr_4:2,246,989..2,249,217(+)		Heterokaryon incompatibility	Heterokaryon incompatibility
427	Bcin04g06640	Vir	14	0.647896	-0.00350545	0.356882	0.00512718		-1.30625e-06	-0.00682525	1.67286e-05	3.64691e-07	7.9153e-07	0.00544796	1.32481e-05	1.62898e-07		bcin_chr_4:2,291,100..2,293,320(-)
428	Bcin04g06730	Spe	7	0.446786	0.00123255	0.159454	0.0119363		1.27451e-06	0.00927097	1.79e-05	3.92542e-07	-9.27514e-07	-0.00856247	1.7218e-05	3.89616e-07		bcin_chr_4:2,347,940..2,350,111(-)		Extracellular membrane protein, CFEM domain	Extracellular membrane protein, CFEM domain	Extracellular membrane protein, CFEM domain			anchored component of membrane;cell wall
429	Bcin05g00440	Spe	18	0.793119	0.0039969	0.0711986	0.0517497		3.34774e-06	0.0471719	7.09611e-05	4.09549e-06	-1.71957e-06	-0.020279	1.7117e-05	4.79306e-07		bcin_chr_5:171,164..173,134(-)	Bcyim1	GroES-like superfamily;Alcohol dehydrogenase, N-terminal;Polyketide synthase, enoylreductase domain;NAD(P)-binding domain superfamily	Alcohol dehydrogenase, N-terminal	Polyketide synthase, enoylreductase domain	GroES-like superfamily;NAD(P)-binding domain superfamily			oxidoreductase activity	oxidation-reduction process	1.6.5.5 (NADPH:quinone reductase)
430	Bcin05g00450	Spe	11	0.643618	0.00237642	0.147327	0.0469683		3.49787e-06	0.034491	4.77727e-05	2.0267e-06	-2.49699e-06	-0.0256274	2.44211e-05	9.46742e-07		bcin_chr_5:173,157..176,685(+)	Bckap120	Importin-beta, N-terminal domain;Armadillo-type fold	Importin-beta, N-terminal domain	Importin-beta, N-terminal domain	Armadillo-type fold			Ran GTPase binding	intracellular protein transport
431	Bcin05g00470	Spe	4	0.349078	0.0133047	0.427674	0.0290588		2.44368e-06	0.0286051	0.000110975	6.41541e-06	-1.49932e-06	-0.0126857	3.34474e-05	1.37532e-06		bcin_chr_5:180,212..181,163(+)							integral component of membrane
432	Bcin05g00480	Spe	2	0.392277	0.0167116	0.00147897	0.0853291		3.78804e-06	0.0506648	6.44e-05	3.3596e-06	-9.22192e-07	-0.00573527	7.26316e-06	6.83157e-08		bcin_chr_5:181,229..183,586(-)		Phosphoribosyltransferase domain;Adenine phosphoribosyl transferase;Phosphoribosyltransferase-like	Phosphoribosyltransferase domain		Phosphoribosyltransferase-like		cytoplasm	adenine phosphoribosyltransferase activity	AMP salvage;adenine salvage;nucleoside metabolic process;purine ribonucleoside salvage	2.4.2.7 (Adenine phosphoribosyltransferase)
433	Bcin05g00490	Vir	24	0.493559	0.0079174	0.116744	-0.0181239		9.16504e-07	0.00468029	1.43167e-05	3.12795e-07	-1.27354e-06	-0.0126681	2.37982e-05	8.12543e-07		bcin_chr_5:187,795..189,696(+)
434	Bcin05g00500	Spe	49	0.444717	-0.00363328	0.157712	-0.00650689		-1.10996e-06	-0.00750652	3.17041e-05	1.20811e-06	2.46457e-07	0.00096398	1.12288e-05	1.49779e-07		bcin_chr_5:190,476..192,208(+)
435	Bcin05g00510	SpeVir	16	0.450604	0.0120712	0.164075	-0.0285673		6.68805e-07	0.010693	3.45125e-05	1.36137e-06	-9.48758e-07	-0.0142981	3.58618e-05	1.86649e-06		bcin_chr_5:196,008..196,940(+)		HAD hydrolase, subfamily IA;HAD-like superfamily;Haloacid dehalogenase-like hydrolase	Haloacid dehalogenase-like hydrolase		HAD-like superfamily	HAD hydrolase, subfamily IA		hydrolase activity		5.4.2.6 (Beta-phosphoglucomutase)
436	Bcin05g00520	Spe	28	0.467691	0.00629084	0.164619	0.00248759		6.86633e-07	0.0087705	4.26679e-05	1.87426e-06	-5.17831e-07	-0.00460528	1.16767e-05	1.96691e-07		bcin_chr_5:197,302..198,351(+)
437	Bcin05g00530	Spe	12	0.471278	0.000567402	0.142063	0.0230195		8.72435e-07	0.01188	4.3625e-05	2.03565e-06	-2.60437e-07	-0.00186656	1.31842e-05	1.89072e-07		bcin_chr_5:198,386..200,439(+)		Beta-lactamase-related;Beta-lactamase/transpeptidase-like	Beta-lactamase-related		Beta-lactamase/transpeptidase-like					3.1.1.- (Carboxylic ester hydrolases.)
438	Bcin05g00550	Spe	18	0.114032	0.0124893	0.19721	-0.0101005		5.85338e-07	0.00440095	5.04111e-05	2.24583e-06	1.15766e-07	0.00119037	1.13684e-05	1.76922e-07		bcin_chr_5:210,887..212,183(+)
439	Bcin05g00560	Spe	31	0.109395	-0.00395098	0.25148	-0.00268797		-7.56148e-07	-0.0107519	4.06065e-05	1.58206e-06	3.27739e-07	0.00284424	1.25467e-05	2.38982e-07		bcin_chr_5:212,497..213,659(+)		S-adenosyl-L-methionine-dependent methyltransferase			S-adenosyl-L-methionine-dependent methyltransferase					2.1.3.- (Carboxy- and carbamoyltransferases.)
440	Bcin05g00570	Vir	10	0.125048	0.00145853	0.240328	-0.0198081		-2.00217e-07	-0.00965415	2.774e-05	1.06267e-06	-4.60744e-07	-0.00203417	1.68842e-05	3.48222e-07		bcin_chr_5:215,036..217,873(-)		Sugar phosphate transporter domain	Sugar phosphate transporter domain				integral component of membrane
441	Bcin05g00580	Spe	14	0.0777747	-0.028081	0.394759	0.0124604		-2.53722e-06	-0.0275854	4.56571e-05	1.91504e-06	5.73188e-07	0.00625709	1.44135e-05	3.38469e-07		bcin_chr_5:220,413..223,153(+)										5.4.99.9 (UDP-galactopyranose mutase)
442	Bcin05g00600	SpeVir	7	0.0470008	-0.0283795	0.200333	0.0440851		-1.17575e-06	-0.017142	2.46286e-05	9.6815e-07	2.01626e-07	0.00478344	1.86917e-05	5.42784e-07		bcin_chr_5:226,028..229,210(-)		Transcription factor domain, fungi	Transcription factor domain, fungi	Transcription factor domain, fungi			nucleus	DNA binding;zinc ion binding	transcription, DNA-templated
443	Bcin05g00610	Spe	9	0.148526	0.0087147	0.0830706	-0.0273944		4.09104e-07	-0.00038013	2.50556e-05	8.02628e-07	-7.86551e-07	-0.00485838	1.65614e-05	4.89529e-07		bcin_chr_5:232,620..233,386(+)
444	Bcin05g00650	Spe	4	0.0262407	-0.0432827	0.384597	0.0643795		-3.1989e-06	-0.0432437	0.0002973	2.09426e-05	1.82706e-06	0.0222561	1.63158e-05	4.46973e-07		bcin_chr_5:258,101..259,919(-)	Bcdal2	Allantoicase;Galactose-binding-like domain superfamily;Allantoicase domain	Allantoicase domain		Galactose-binding-like domain superfamily	Allantoicase		allantoicase activity	allantoin catabolic process	3.5.3.4 (Allantoicase)
445	Bcin05g00660	Vir	8	0.133421	-0.0319227	0.0332628	0.0867004		-4.87901e-07	-0.00697951	1.3775e-05	2.52241e-07	1.42176e-06	0.0236491	4.49605e-05	2.76213e-06		bcin_chr_5:260,314..262,098(+)		Cytochrome b561/ferric reductase transmembrane	Cytochrome b561/ferric reductase transmembrane	Cytochrome b561/ferric reductase transmembrane			integral component of membrane
446	Bcin05g00670	Vir	32	0.140075	-0.010767	0.25213	-0.000153131		-9.87457e-07	-0.0119529	2.71063e-05	8.70568e-07	4.28606e-07	0.00590059	1.89638e-05	7.30535e-07		bcin_chr_5:262,819..267,696(-)		Peptidase M13;Peptidase M13, N-terminal domain;Peptidase M13, C-terminal domain	Peptidase M13, C-terminal domain;Peptidase M13, N-terminal domain				integral component of membrane	metal ion binding;metalloendopeptidase activity;metallopeptidase activity	proteolysis	3.4.24.71 (Endothelin-converting enzyme 1)
447	Bcin05g00740	Vir	11	0.629878	-0.0059303	0.0850318	0.0464164		9.46394e-07	0.0190158	3.48909e-05	1.34811e-06	-3.2959e-07	-0.00453569	9.19713e-05	7.02783e-06		bcin_chr_5:303,404..305,692(+)		Carboxylesterase, type B;Alpha/Beta hydrolase fold	Carboxylesterase, type B		Alpha/Beta hydrolase fold					3.1.1.- (Carboxylic ester hydrolases.)
448	Bcin05g00750	Spe	4	0.20778	0.0223952	0.166871	-0.0372956		1.02702e-06	0.00631157	1.445e-05	1.60727e-07	-5.1515e-07	-0.00267792	1.21579e-05	1.91151e-07		bcin_chr_5:307,823..311,387(-)		WD40 repeat;F-box domain;WD40 repeat, conserved site;G-protein beta WD-40 repeat;F-box-like domain superfamily;WD40-repeat-containing domain superfamily	WD40 repeat;F-box domain	F-box domain;WD40 repeat	WD40-repeat-containing domain superfamily;F-box-like domain superfamily			protein binding
449	Bcin05g00760	Spe	3	0.221305	-0.000617403	0.252065	0.0208785		7.25351e-07	0.0075931	1.29e-05	1.5357e-07	-8.50818e-08	0.000678564	1.04912e-05	8.5976e-08		bcin_chr_5:312,777..318,293(+)	Bccdc24	Dbl homology (DH) domain;PB1 domain;Guanine-nucleotide dissociation stimulator, CDC24, conserved site;Pleckstrin homology domain;Cdc24/Scd1, N-terminal;Rho guanine nucleotide exchange factor Cdc24/Scd1, PH domain;Dbl homology (DH) domain superfamily	PB1 domain;Dbl homology (DH) domain;Cdc24/Scd1, N-terminal	Pleckstrin homology domain;Dbl homology (DH) domain	Dbl homology (DH) domain superfamily			Rho guanyl-nucleotide exchange factor activity;guanyl-nucleotide exchange factor activity;protein binding	intracellular signal transduction
450	Bcin05g00820	SpeVir	8	0.167034	-0.00893459	0.278411	0.0138507		-6.26906e-07	-0.00402377	2.78125e-05	9.38346e-07	5.28896e-07	0.00462587	2.26711e-05	8.21682e-07		bcin_chr_5:335,412..338,479(+)	Bctoa1	Transcription factor IIA, alpha/beta subunit;Transcription factor IIA, beta-barrel	Transcription factor IIA, alpha/beta subunit	Transcription factor IIA, alpha/beta subunit	Transcription factor IIA, beta-barrel		transcription factor TFIIA complex		transcription initiation from RNA polymerase II promoter	3.6.4.12 (DNA helicase)
451	Bcin05g00830	SpeVir	17	0.230566	0.00716622	0.301934	-0.0282909		6.24885e-07	0.00734762	2.60353e-05	8.41504e-07	-1.30361e-06	-0.0106477	1.76285e-05	5.54668e-07		bcin_chr_5:339,395..341,101(-)		Protein of unknown function DUF3429	Protein of unknown function DUF3429				integral component of membrane
452	Bcin05g00870	Spe	36	0.122704	0.00559219	0.1463	-0.023582		-2.47918e-07	-0.00249835	2.88194e-05	9.4398e-07	2.12874e-07	0.00245209	1.17135e-05	2.25335e-07		bcin_chr_5:359,652..364,956(-)		Ubiquitin-conjugating enzyme E2;Poly(ADP-ribose) polymerase, catalytic domain;Ubiquitin-conjugating enzyme/RWD-like	Ubiquitin-conjugating enzyme E2;Poly(ADP-ribose) polymerase, catalytic domain		Ubiquitin-conjugating enzyme/RWD-like			NAD+ ADP-ribosyltransferase activity		2.3.2.23 (E2 ubiquitin-conjugating enzyme)
453	Bcin05g00910	Vir	10	0.366869	-0.00656598	0.161227	0.0238586		-3.98473e-07	-0.000320387	1.285e-05	2.11026e-07	4.19635e-07	0.0017277	2.07789e-05	7.17229e-07		bcin_chr_5:371,902..373,522(+)		Alpha/beta hydrolase fold-3;Alpha/Beta hydrolase fold	Alpha/beta hydrolase fold-3		Alpha/Beta hydrolase fold			hydrolase activity		3.-.-.- (Hydrolases.)
454	Bcin05g00920	Spe	1	3.61533e-05	0.0793229	0.00729432	-0.0745994		5.15861e-06	0.0516157	0.0001473	7.58097e-06	-2.93956e-06	-0.0282268	2.36842e-05	6.37857e-07		bcin_chr_5:375,362..376,804(+)							integral component of membrane
455	Bcin05g00930	Spe	7	0.27514	0.0412861	0.168322	-0.0524869		2.94145e-06	0.0280345	9.05714e-05	4.74299e-06	-2.07786e-06	-0.0221988	2.7985e-05	1.07721e-06		bcin_chr_5:376,817..381,757(-)	Bcpan1	EH domain;EF-hand domain;EF-hand domain pair;Domain of unknown function DUF1720	Domain of unknown function DUF1720;EH domain	EH domain;EF-hand domain	EF-hand domain pair		actin cortical patch;endosome membrane;plasma membrane	actin binding;calcium ion binding;protein binding	endocytosis
456	Bcin05g00940	Spe	1	2.48945e-05	0.0766601	0.00130342	-0.0840919		5.52028e-06	0.0535146	0.0002055	1.10513e-05	-4.03385e-06	-0.0433899	4.33684e-05	2.00719e-06		bcin_chr_5:381,783..384,011(-)		S-adenosyl-L-methionine-dependent methyltransferase			S-adenosyl-L-methionine-dependent methyltransferase		integral component of membrane			2.1.1.79 (Cyclopropane-fatty-acyl-phospholipid synthase)
457	Bcin05g00950	Spe	8	0.191541	-0.00133895	0.427363	-0.0148337		-3.8637e-07	0.00150998	4.0725e-05	1.72956e-06	-2.56566e-07	-0.00343563	1.57105e-05	3.72539e-07		bcin_chr_5:384,127..385,210(+)
458	Bcin05g00960	SpeVir	17	0.13866	-0.013445	0.223615	0.0137771		-9.38929e-07	-0.0117912	2.85118e-05	1.1055e-06	3.90926e-07	0.0111498	2.42972e-05	8.94012e-07		bcin_chr_5:387,520..389,250(-)	Bcmak11	WD40 repeat;WD40-repeat-containing domain superfamily		WD40 repeat	WD40-repeat-containing domain superfamily			protein binding
459	Bcin05g01000	Vir	40	0.164857	-0.020206	0.090221	0.0737787		5.09331e-07	0.00430327	1.828e-05	3.88308e-07	5.78538e-07	0.00922126	2.00737e-05	6.23569e-07		bcin_chr_5:401,016..403,219(+)		Cytochrome P450;Cytochrome P450, E-class, group II;Cytochrome P450, E-class, CYP52;Cytochrome P450, conserved site;Cytochrome P450 superfamily	Cytochrome P450		Cytochrome P450 superfamily		integral component of membrane	heme binding;iron ion binding;monooxygenase activity;oxidoreductase activity, acting on paired donors, with incorporation or reduction of molecular oxygen;oxidoreductase activity, acting on paired donors, with incorporation or reduction of molecular oxygen, reduced flavin or flavoprotein as one dono	oxidation-reduction process;pathogenesis
460	Bcin05g01010	Spe	4	0.460923	-0.0151131	0.330203	-0.00278018		-2.90639e-06	-0.0237251	6.2775e-05	3.0903e-06	2.22454e-06	0.0172311	2.28947e-05	7.42211e-07		bcin_chr_5:403,220..404,420(-)	Bccoq10	Coenzyme Q-binding protein COQ10, START domain	Coenzyme Q-binding protein COQ10, START domain
461	Bcin05g01020	Vir	7	0.248282	0.0115534	0.0345073	-0.0280425		-2.75772e-07	-0.00461199	1.27429e-05	1.62329e-07	-4.97524e-07	-0.00149533	1.0015e-05	1.17347e-07		bcin_chr_5:404,452..405,327(+)							integral component of membrane
462	Bcin05g01030	Spe	16	0.13093	-0.00207338	0.0546264	0.0462683		-9.63297e-08	-0.00491132	2.5675e-05	8.60415e-07	9.24144e-07	0.00958855	1.66776e-05	4.04774e-07		bcin_chr_5:405,332..406,813(+)		Alcohol dehydrogenase, zinc-type, conserved site;GroES-like superfamily;Alcohol dehydrogenase, C-terminal;Alcohol dehydrogenase, N-terminal;Polyketide synthase, enoylreductase domain;NAD(P)-binding domain superfamily	Alcohol dehydrogenase, C-terminal;Alcohol dehydrogenase, N-terminal	Polyketide synthase, enoylreductase domain	GroES-like superfamily;NAD(P)-binding domain superfamily			oxidoreductase activity;zinc ion binding	oxidation-reduction process	1.1.1.14 (L-iditol 2-dehydrogenase)
463	Bcin05g01070	Vir	29	0.427574	-0.00270405	0.249337	0.0104887		-1.06643e-07	-0.00234845	1.08103e-05	1.60529e-07	1.59685e-06	0.0202342	3.78439e-05	2.41821e-06		bcin_chr_5:420,538..421,021(+)
464	Bcin05g01100	Vir	5	0.3239	-0.0102934	0.110598	0.0155246		-4.42891e-07	-0.00424376	1.904e-05	4.20204e-07	1.33845e-07	0.00557757	1.34105e-05	2.29689e-07		bcin_chr_5:437,769..441,269(-)
465	Bcin05g01240	Vir	17	0.0177491	-0.0370293	0.000884318	0.0833694		-4.14572e-07	-0.00383403	1.02353e-05	8.29928e-08	6.95032e-07	0.00732918	1.14489e-05	1.26852e-07		bcin_chr_5:506,185..508,025(-)		Band 7 domain;Stomatin/HflK/HflC family;Band 7/SPFH domain superfamily;Band-7 stomatin-like	Band 7 domain	Band 7 domain	Band 7/SPFH domain superfamily		membrane;plasma membrane
466	Bcin05g01540	Spe	5	0.190975	0.0161489	0.0437367	-0.0211748		1.12992e-06	0.00985934	4.09e-05	1.74261e-06	-6.43545e-07	0.000240023	2.34316e-05	8.27265e-07		bcin_chr_5:597,793..599,049(+)		SRA-YDG;PUA-like superfamily	SRA-YDG	SRA-YDG	PUA-like superfamily		nucleus
467	Bcin05g01870	Vir	9	0.189197	0.0178569	0.167691	-0.0230853		1.16105e-06	0.0117669	2.61e-05	8.8055e-07	-1.04822e-06	-0.00985129	4.47602e-05	2.30794e-06		bcin_chr_5:717,528..719,539(-)		GNAT domain;Bromodomain;Acyl-CoA N-acyltransferase;Bromodomain, conserved site;Bromodomain-like superfamily;Histone acetyltransferase GCN5	Bromodomain;GNAT domain	Bromodomain	Bromodomain-like superfamily;Acyl-CoA N-acyltransferase		nucleus	N-acetyltransferase activity;histone acetyltransferase activity;protein binding		2.3.1.48 (Histone acetyltransferase)
468	Bcin05g02180	Spe	1	0.140444	0.0237702	0.982441	0.000503332		5.3618e-06	0.0474937	0.0001247	5.92571e-06	-4.15829e-06	-0.044591	5.38947e-05	2.36379e-06		bcin_chr_5:800,470..804,079(-)
469	Bcin05g02190	Spe	1	0.437625	-0.0126291	0.198774	0.0293906		1.39534e-06	0.00351276	1.24e-05	9.67288e-08	-3.05503e-06	-0.0226051	1.36842e-05	3.63718e-07		bcin_chr_5:813,219..816,213(-)	Bcscp1	Calponin homology domain;CH domain superfamily	Calponin homology domain	Calponin homology domain	CH domain superfamily			protein binding
470	Bcin05g02230	Vir	14	0.225997	-0.00395757	0.282148	-0.00827028		-1.06207e-06	-0.00814601	1.61429e-05	3.42906e-07	1.1616e-06	0.0139974	3.40075e-05	2.01166e-06		bcin_chr_5:829,808..832,426(+)
471	Bcin05g02270	Spe	9	0.226151	0.0136067	0.0307226	-0.00996261		6.2589e-07	0.00866232	0.000142522	8.45632e-06	-5.68808e-07	-0.00256361	1.76374e-05	4.89944e-07		bcin_chr_5:839,839..841,153(+)
472	Bcin05g02280	Spe	8	0.611352	0.00728698	0.138119	-0.0313218		-3.97344e-07	-0.00236801	1.0425e-05	1.17336e-07	-7.28282e-07	-0.00408287	1.13158e-05	2.24294e-07		bcin_chr_5:841,931..845,856(-)
473	Bcin05g02300	Spe	8	0.388079	-0.00136405	0.182882	0.0119815		5.56913e-08	0.000317921	2.85125e-05	8.99257e-07	1.78277e-07	0.00671318	1.91842e-05	5.99217e-07		bcin_chr_5:849,308..851,350(+)	Bcnpr2	Nitrogen permease regulator 2	Nitrogen permease regulator 2							4.4.1.16 (Selenocysteine lyase)
474	Bcin05g02340	Vir	1	0.0943927	-0.0307648	3.12631e-06	0.114862		-2.68522e-06	-0.0242324	2.23e-05	5.30563e-07	4.08019e-06	0.055723	7.51579e-05	4.11124e-06		bcin_chr_5:861,428..862,923(+)		Oxoglutarate/iron-dependent dioxygenase;Non-haem dioxygenase N-terminal domain	Oxoglutarate/iron-dependent dioxygenase;Non-haem dioxygenase N-terminal domain					metal ion binding;oxidoreductase activity	oxidation-reduction process	1.14.11.6 (Thymine dioxygenase)
475	Bcin05g02350	Vir	4	0.231915	0.0084231	0.0461619	-0.0298586		-2.91651e-07	-0.000329311	3.4425e-05	1.06367e-06	-3.32147e-07	-0.00908225	4.97895e-05	2.23921e-06		bcin_chr_5:862,930..864,239(-)		Uncharacterised protein family SERF, N-terminal;At2g23090-like, zinc-binding domain;At2g23090-like	Uncharacterised protein family SERF, N-terminal;At2g23090-like, zinc-binding domain
476	Bcin05g02360	Vir	6	0.28206	0.00564091	0.206536	-0.0376505		-4.45692e-07	-0.00418736	2.81e-05	8.72488e-07	-1.63672e-07	0.00245598	2.05439e-05	5.7061e-07		bcin_chr_5:864,423..866,466(+)		AT hook, DNA-binding motif	AT hook, DNA-binding motif	AT hook, DNA-binding motif				DNA binding
477	Bcin05g02380	Vir	13	0.0585008	-0.0382401	0.0750906	0.0884388		-2.08089e-06	-0.0154569	1.75077e-05	3.87475e-07	3.10677e-06	0.0384297	8.85749e-05	5.73385e-06		bcin_chr_5:872,644..873,007(+)
478	Bcin05g02390	Spe	3	0.0880348	0.0303773	0.317021	-0.0237293		3.03268e-06	0.019978	1.57667e-05	3.54873e-07	-8.32953e-07	-0.0046543	9.57895e-06	9.6988e-08		bcin_chr_5:878,748..883,013(-)	Bcsfp1	Zinc finger C2H2-type;Zinc finger C2H2 superfamily		Zinc finger C2H2-type	Zinc finger C2H2 superfamily
479	Bcin05g02400	Spe	1	0.00237677	0.0505786	0.120031	-0.0371683		5.50072e-06	0.0472666	0.0001276	6.31812e-06	-1.72895e-06	-0.0125289	9.68421e-06	1.64824e-07		bcin_chr_5:885,247..886,903(+)	Bcrcf2	Hypoxia induced protein, domain;Respiratory supercomplex factor 2, mitochondrial	Hypoxia induced protein, domain				integral component of membrane
480	Bcin05g02440	Vir	3	0.00419471	-0.0493946	0.00323141	0.0731792		-2.85586e-06	-0.025095	2.15333e-05	5.58994e-07	1.83765e-06	0.0128469	1.44211e-05	3.33888e-07		bcin_chr_5:899,639..900,160(+)
481	Bcin05g02460	Spe	3	0.0150198	-0.0453019	0.00357421	0.0723764		-3.86989e-06	-0.0304432	7.58333e-05	3.77154e-06	2.70949e-06	0.0211749	2.77895e-05	7.86515e-07		bcin_chr_5:904,841..906,521(+)		Bax inhibitor 1-related	Bax inhibitor 1-related				integral component of membrane
482	Bcin05g02530	Vir	3	0.0100187	-0.0472076	8.38698e-06	0.111847		-2.45377e-06	-0.0242416	2.24333e-05	8.35405e-07	2.70415e-06	0.0399488	4.89474e-05	2.68104e-06		bcin_chr_5:929,717..931,982(+)		Tannase/feruloyl esterase;Alpha/Beta hydrolase fold	Tannase/feruloyl esterase		Alpha/Beta hydrolase fold			carboxylic ester hydrolase activity;metal ion binding		3.1.1.- (Carboxylic ester hydrolases.)
483	Bcin05g02540	Vir	7	0.0227387	-0.0424858	2.23212e-06	0.121059		-2.04174e-06	-0.020708	2.24571e-05	6.80282e-07	3.68098e-06	0.0621566	0.000207188	1.77445e-05		bcin_chr_5:932,635..934,685(+)		S-adenosyl-L-methionine-dependent methyltransferase			S-adenosyl-L-methionine-dependent methyltransferase					2.1.1.163 (Demethylmenaquinone methyltransferase)
484	Bcin05g02550	Vir	5	0.0270208	-0.0423035	1.27167e-05	0.111241		-1.93176e-06	-0.0214494	2.274e-05	7.49003e-07	2.43058e-06	0.0379358	3.94737e-05	2.19002e-06		bcin_chr_5:935,012..936,312(-)		Lysozyme-like domain superfamily			Lysozyme-like domain superfamily
485	Bcin05g02560	SpeVir	8	0.00600045	-0.0486948	1.57483e-06	0.119169		-1.9198e-06	-0.0209433	1.93125e-05	5.49807e-07	3.11702e-06	0.0589595	5.75132e-05	3.59022e-06		bcin_chr_5:938,593..940,957(-)
486	Bcin05g02570	Vir	3	0.0241062	-0.0408926	1.13061e-05	0.108631		-1.71754e-06	-0.0148486	1.56333e-05	2.92477e-07	2.47e-06	0.0350695	2.8386e-05	1.1846e-06		bcin_chr_5:941,791..943,559(+)		Zinc/iron permease	Zinc/iron permease				integral component of membrane;membrane	metal ion transmembrane transporter activity	metal ion transport;transmembrane transport
487	Bcin05g02590	Vir	5	0.0598351	-0.0358443	9.34035e-06	0.115685		-1.46215e-06	-0.0140557	1.564e-05	3.15357e-07	2.89331e-06	0.0446473	7.64632e-05	5.30571e-06		bcin_chr_5:945,281..948,514(-)	Bcrpd3	Histone deacetylase family;Histone deacetylase;Ureohydrolase domain superfamily;Histone deacetylase domain	Histone deacetylase domain		Ureohydrolase domain superfamily			NAD-dependent histone deacetylase activity (H3-K14 specific);histone deacetylase activity	histone deacetylation	3.5.1.98 (Histone deacetylase)
488	Bcin05g02600	SpeVir	4	0.0991008	-0.00361959	0.0134677	0.0291595		-2.12971e-07	-0.000115635	4.5725e-05	1.73981e-06	7.2082e-07	0.0208307	2.30789e-05	9.65732e-07		bcin_chr_5:948,522..949,898(+)		JAB1/MPN/MOV34 metalloenzyme domain;Rpn11/EIF3F, C-terminal;26S Proteasome non-ATPase regulatory subunit 14	JAB1/MPN/MOV34 metalloenzyme domain;Rpn11/EIF3F, C-terminal	JAB1/MPN/MOV34 metalloenzyme domain				Lys63-specific deubiquitinase activity;isopeptidase activity;metallopeptidase activity;protein binding		3.1.2.15 (Deleted entry)
489	Bcin05g02660	Vir	2	0.0235392	-0.0428905	8.17167e-05	0.108071		-1.02691e-06	-0.0126071	1.305e-05	2.04329e-07	2.44007e-06	0.0439523	5.11579e-05	3.45499e-06		bcin_chr_5:970,714..973,123(+)	Bccts2	2S globulin;Glycoside hydrolase family 18, catalytic domain;Glycosyl hydrolases family 18 (GH18) active site;Chitinase II;Glycoside hydrolase superfamily;Chitinase insertion domain superfamily	Glycoside hydrolase family 18, catalytic domain	Chitinase II	Glycoside hydrolase superfamily;Chitinase insertion domain superfamily			chitin binding;chitinase activity;hydrolase activity, hydrolyzing O-glycosyl compounds	carbohydrate metabolic process;chitin catabolic process;polysaccharide catabolic process	3.2.1.14 (Chitinase)
490	Bcin05g02690	Vir	3	0.243968	-0.032047	0.161098	0.0637611		-1.97707e-06	-0.0158159	1.62e-05	3.5145e-07	1.8718e-06	0.0247948	2.10526e-05	6.47767e-07		bcin_chr_5:981,377..982,037(+)
491	Bcin05g02700	Vir	18	0.129453	0.0143705	0.202173	-0.0290917		1.20542e-06	0.00637763	2.54389e-05	7.31164e-07	-1.31234e-06	-0.00996227	5.70175e-05	2.86105e-06		bcin_chr_5:984,053..985,957(+)		Protein of unknown function DUF3431	Protein of unknown function DUF3431				integral component of membrane
492	Bcin05g02710	Vir	11	0.246257	-0.00347634	0.236801	0.0146508		2.50358e-07	0.00133616	1.61091e-05	3.38234e-07	8.67959e-08	0.00351806	4.41244e-05	2.16653e-06		bcin_chr_5:987,010..988,878(+)		Cytochrome P450;Cytochrome P450, E-class, CYP52;Cytochrome P450, conserved site;Cytochrome P450 superfamily	Cytochrome P450		Cytochrome P450 superfamily			heme binding;iron ion binding;oxidoreductase activity, acting on paired donors, with incorporation or reduction of molecular oxygen;oxidoreductase activity, acting on paired donors, with incorporation or reduction of molecular oxygen, reduced flavin or flavoprotein as one donor, and incorporation of	oxidation-reduction process;pathogenesis	2.3.1.- (Transferring groups other than amino-acyl groups.)
493	Bcin05g02720	Vir	4	0.282419	0.0174757	0.319605	-0.0423452		9.71964e-07	0.00454027	2.89e-05	8.58355e-07	-1.35533e-06	-0.0115159	6.77895e-05	3.48685e-06		bcin_chr_5:989,078..992,522(+)		Membrane bound O-acyl transferase, MBOAT	Membrane bound O-acyl transferase, MBOAT				integral component of membrane			2.3.1.- (Transferring groups other than amino-acyl groups.)
494	Bcin05g02750	Vir	25	0.0279601	-0.0359395	0.000268921	0.0815567		-3.75604e-06	-0.0213561	2.2288e-05	6.05471e-07	4.84405e-06	0.0424172	5.32211e-05	2.40046e-06		bcin_chr_5:996,187..997,105(+)
495	Bcin05g02760	SpeVir	21	0.0391653	-0.037121	0.0449654	0.0796054		-2.28537e-06	-0.0138286	1.53667e-05	2.84279e-07	2.85538e-06	0.0247157	3.03609e-05	1.23547e-06		bcin_chr_5:998,064..1,000,407(+)		Cation/H+ exchanger	Cation/H+ exchanger				integral component of membrane	solute:proton antiporter activity	cation transport;transmembrane transport
496	Bcin05g02770	SpeVir	3	0.0384705	-0.00554859	0.237448	0.000187104		-2.29862e-07	-0.00866407	0.0001985	1.17054e-05	-7.9692e-07	-0.00471613	0.000112456	7.17151e-06		bcin_chr_5:1,003,701..1,007,780(-)
497	Bcin05g02780	SpeVir	5	0.166132	-0.0273728	0.209428	0.0462599		-1.07207e-07	-0.0017246	1.488e-05	1.64214e-07	-4.26654e-07	0.0039619	1.79158e-05	6.40486e-07		bcin_chr_5:1,016,682..1,020,377(-)		Zn(2)-C6 fungal-type DNA-binding domain;Zn(2)-C6 fungal-type DNA-binding domain superfamily	Zn(2)-C6 fungal-type DNA-binding domain	Zn(2)-C6 fungal-type DNA-binding domain	Zn(2)-C6 fungal-type DNA-binding domain superfamily		host cell nucleus;nucleus	DNA-binding transcription factor activity, RNA polymerase II-specific;zinc ion binding	regulation of transcription, DNA-templated
498	Bcin05g02840	SpeVir	3	0.520167	-0.0175119	0.402186	0.0457649		5.75512e-07	-0.000953142	1.28333e-05	1.63639e-07	-3.90894e-07	0.000247838	1.6e-05	2.13278e-07		bcin_chr_5:1,053,100..1,058,377(+)	Bcplc1	C2 domain;Phosphatidylinositol-specific phospholipase C, X domain;Phosphoinositide phospholipase C family;Phospholipase C, phosphatidylinositol-specific, Y domain;EF-hand domain pair;PLC-like phosphodiesterase, TIM beta/alpha-barrel domain superfamily;Plc1, PH domain	C2 domain;Phospholipase C, phosphatidylinositol-specific, Y domain;Phosphatidylinositol-specific phospholipase C, X domain	Phosphatidylinositol-specific phospholipase C, X domain;Phospholipase C, phosphatidylinositol-specific, Y domain;C2 domain	EF-hand domain pair;PLC-like phosphodiesterase, TIM beta/alpha-barrel domain superfamily			calcium ion binding;phosphatidylinositol phospholipase C activity;phosphoric diester hydrolase activity	intracellular signal transduction;lipid catabolic process;lipid metabolic process;signal transduction	3.1.4.11 (Phosphoinositide phospholipase C)
499	Bcin05g03160	Vir	2	0.186748	-0.0190891	0.0251174	0.0334715		-1.83958e-06	-0.0166602	1.435e-05	4.14912e-07	2.02237e-06	0.0281689	5.03684e-05	2.66858e-06		bcin_chr_5:1,157,207..1,159,179(-)		UV radiation resistance proteiutophagy-related protein 14	UV radiation resistance proteiutophagy-related protein 14
500	Bcin05g03260	Vir	5	0.391031	0.0188204	0.100167	-0.0391926		6.24325e-07	0.00454292	1.086e-05	1.4461e-07	-3.55779e-07	0.000174836	1.10526e-05	1.44651e-07		bcin_chr_5:1,193,652..1,194,407(+)
501	Bcin05g03290	Vir	5	0.32798	0.00381384	0.041337	-0.0286287		2.61182e-07	0.00240477	1.214e-05	1.57561e-07	-6.2402e-07	-0.00465545	2.04632e-05	5.02629e-07		bcin_chr_5:1,199,993..1,203,205(-)	Bckex2	Peptidase S8/S53 domain;P domain;Galactose-binding-like domain superfamily;Peptidase S8, subtilisin-related;Peptidase S8, subtilisin, His-active site;Peptidase S8, subtilisin, Ser-active site;Kexin/furin catalytic domain;Peptidase S8/S53 domain superfamily	Peptidase S8/S53 domain;P domain		Galactose-binding-like domain superfamily;Peptidase S8/S53 domain superfamily		integral component of membrane	serine-type endopeptidase activity;serine-type peptidase activity	proteolysis	3.4.21.- (Serine endopeptidases.)
502	Bcin05g03390	Vir	10	0.51835	0.00469694	0.0708422	-0.0272741		1.10936e-07	0.000709395	1.164e-05	1.02698e-07	-4.8789e-07	-0.000416674	2.98105e-05	1.66587e-06		bcin_chr_5:1,236,387..1,238,325(-)		Glycoside hydrolase, family 5;Glycoside hydrolase superfamily	Glycoside hydrolase, family 5		Glycoside hydrolase superfamily			hydrolase activity, hydrolyzing O-glycosyl compounds	carbohydrate metabolic process	3.2.1.58 (Glucan 1,3-beta-glucosidase)
503	Bcin05g03690	Vir	34	0.315103	-0.000749711	0.327665	0.0031599		3.74607e-07	0.00433156	2.54588e-05	8.05343e-07	-5.3267e-07	-0.00483801	1.92353e-05	5.30807e-07		bcin_chr_5:1,332,628..1,335,857(-)
504	Bcin05g03700	Vir	3	0.135296	0.00327745	0.16397	0.0206438		-9.76906e-08	0.00397257	1.48e-05	2.67971e-07	1.0816e-06	0.015477	4.67719e-05	2.66327e-06		bcin_chr_5:1,338,492..1,342,145(-)
505	Bcin05g03950	Vir	13	0.135975	0.0239617	0.242016	-0.0455248		1.55935e-06	0.0132885	1.46231e-05	3.28319e-07	-1.03397e-06	-0.0209505	3.00729e-05	1.45408e-06		bcin_chr_5:1,419,304..1,424,198(-)	Bcvhc1	Amino acid permease/ SLC12A domain;SLC12A transporter, C-terminal	Amino acid permease/ SLC12A domain;SLC12A transporter, C-terminal				integral component of membrane;membrane	transmembrane transporter activity	ion transport;transmembrane transport
506	Bcin05g04090	Vir	6	0.0686378	-0.0159315	0.0653932	0.0479		-4.89894e-07	-0.00498811	1.7e-05	3.2612e-07	1.36555e-06	0.0287158	4.25439e-05	2.20804e-06		bcin_chr_5:1,472,689..1,474,027(-)		Short-chain dehydrogenase/reductase SDR;NAD(P)-binding domain superfamily	Short-chain dehydrogenase/reductase SDR		NAD(P)-binding domain superfamily					1.3.1.33 (Protochlorophyllide reductase)
507	Bcin05g04270	Vir	12	0.27234	-0.0206974	0.00234055	0.0796282		1.37993e-06	0.0087747	1.80667e-05	4.49629e-07	5.47619e-07	0.0164228	3.2693e-05	2.01701e-06		bcin_chr_5:1,534,632..1,536,016(+)	Bclys1	Alanine dehydrogenase/pyridine nucleotide transhydrogenase, NAD(H)-binding domain;Alanine dehydrogenase/pyridine nucleotide transhydrogenase, N-terminal;Saccharopine dehydrogenase [NAD(+), L-lysine-forming];NAD(P)-binding domain superfamily	Alanine dehydrogenase/pyridine nucleotide transhydrogenase, N-terminal	Alanine dehydrogenase/pyridine nucleotide transhydrogenase, NAD(H)-binding domain;Alanine dehydrogenase/pyridine nucleotide transhydrogenase, N-terminal	NAD(P)-binding domain superfamily			saccharopine dehydrogenase (NAD+, L-lysine-forming) activity	lysine biosynthetic process;lysine biosynthetic process via aminoadipic acid	1.5.1.7 (Saccharopine dehydrogenase (NAD(+), L-lysine-forming))
508	Bcin05g04480	Spe	3	0.00324471	-0.0554861	1.55386e-05	0.110536		-2.04635e-06	-0.0293853	3.65333e-05	1.77061e-06	2.18673e-06	0.034674	2.84912e-05	1.16047e-06		bcin_chr_5:1,581,870..1,585,425(-)	Bcpah1	Lipin, N-terminal;Lipin/Ned1/Smp2 (LNS2);LIPIN family;LNS2/PITP;HAD-like superfamily	Lipin, N-terminal;Lipin/Ned1/Smp2 (LNS2)	LNS2/PITP	HAD-like superfamily					3.1.3.4 (Phosphatidate phosphatase)
509	Bcin05g04490	Vir	15	0.088369	-0.0362205	0.00666146	0.119356		-7.89285e-07	-0.0048788	1.22667e-05	1.54009e-07	2.99411e-06	0.0473267	4.76702e-05	2.77194e-06		bcin_chr_5:1,587,639..1,591,696(+)		Fibronectin type III;Fibronectin type III superfamily	Fibronectin type III	Fibronectin type III	Fibronectin type III superfamily		integral component of membrane	protein binding
510	Bcin05g04760	Vir	7	0.0187417	-0.0451339	1.30487e-06	0.129346		-1.09663e-06	-0.0133603	1.08714e-05	1.87535e-07	2.75131e-06	0.0554669	4.92782e-05	3.07871e-06		bcin_chr_5:1,685,557..1,688,158(-)		Sugar transporter, conserved site;Major facilitator superfamily;MFS transporter superfamily	Major facilitator superfamily		MFS transporter superfamily		integral component of membrane	transmembrane transporter activity	transmembrane transport
511	Bcin05g04790	Vir	6	0.279096	-0.0250601	0.233801	0.0808123		-1.08327e-06	-0.00939402	1.46167e-05	1.41169e-07	2.71906e-06	0.0416962	9.84912e-05	8.12084e-06		bcin_chr_5:1,698,866..1,701,359(+)		Purine-cytosine permease;Purine-cytosine permease Fcy2/21/22;Vitamin B6 transporter Tpn1	Purine-cytosine permease				integral component of membrane;membrane;plasma membrane	transmembrane transporter activity;vitamin B6 transmembrane transporter activity	transmembrane transport;vitamin B6 transport
512	Bcin05g04980	Vir	33	0.304485	-0.0109484	0.127667	0.0218781		-9.61121e-07	-0.00584262	1.44485e-05	2.56233e-07	1.23039e-06	0.0136901	3.41595e-05	1.6864e-06		bcin_chr_5:1,775,468..1,777,050(+)
513	Bcin05g05240	Vir	20	0.597788	-0.00605164	0.0848703	0.0423672		4.36899e-07	0.00335764	1.045e-05	1.11403e-07	6.33869e-07	0.00283862	2.66789e-05	1.50321e-06		bcin_chr_5:1,860,876..1,862,802(+)		Calcium uniporter protein, C-terminal;MCU family	Calcium uniporter protein, C-terminal				integral component of membrane;mitochondrial inner membrane		ion transport;mitochondrial calcium ion homeostasis
514	Bcin05g05280	Vir	17	0.549438	0.00147213	0.40239	-0.00382405		-8.7146e-07	-0.00604818	1.36941e-05	1.53565e-07	1.34726e-06	0.0151608	2.63158e-05	1.07884e-06		bcin_chr_5:1,870,763..1,873,101(-)	Bcpex13	SH3 domain;Peroxin 13, N-terminal;Peroxin 13;SH3-like domain superfamily	SH3 domain;Peroxin 13, N-terminal	SH3 domain	SH3-like domain superfamily		integral component of membrane;peroxisomal membrane;peroxisome	protein binding	protein import into peroxisome matrix, docking
515	Bcin05g05340	Vir	2	0.602855	0.00961456	0.000184116	-0.00267671		7.93507e-07	0.00173651	1.12e-05	5.89586e-08	-1.4339e-06	-0.0172543	5.58421e-05	2.58945e-06		bcin_chr_5:1,891,629..1,892,993(+)
516	Bcin05g05450	Vir	12	0.417701	0.00609165	0.300629	0.00305234		2.53597e-07	0.00151127	1.305e-05	1.54051e-07	-2.35592e-07	0.00430128	2.19912e-05	9.70731e-07		bcin_chr_5:1,917,826..1,918,897(-)		Short-chain dehydrogenase/reductase SDR;NAD(P)-binding domain superfamily			NAD(P)-binding domain superfamily					1.-.-.- (Oxidoreductases.)
517	Bcin05g05510	Vir	17	0.185151	-0.00363804	0.060882	-0.00534917		-6.85214e-07	-0.00459275	1.34882e-05	2.24026e-07	9.42228e-10	0.00309457	2.36656e-05	8.95719e-07		bcin_chr_5:1,934,856..1,935,491(-)
518	Bcin05g05640	Spe	12	0.159865	-0.00931617	0.0854144	0.026454		-4.20701e-07	-0.00411548	2.54667e-05	7.13287e-07	5.61487e-07	0.00545518	1.45e-05	1.76892e-07		bcin_chr_5:1,979,929..1,982,161(-)							integral component of membrane
519	Bcin05g06110	SpeVir	38	0.128478	-0.00914338	0.112182	0.0317669		-7.34546e-07	-0.00308899	3.52e-05	1.39297e-06	9.91473e-07	0.0106571	2.97202e-05	1.16787e-06		bcin_chr_5:2,093,650..2,096,156(-)	Bcchk1	Protein kinase domain;Serine/threonine-protein kinase, active site;Protein kinase-like domain superfamily;Protein kinase, ATP binding site	Protein kinase domain	Protein kinase domain	Protein kinase-like domain superfamily			ATP binding;protein kinase activity	protein phosphorylation	2.7.11.1 (Non-specific serine/threonine protein kinase)
520	Bcin05g06170	Vir	7	0.0245666	-0.00524697	0.000427257	0.0352584		3.06522e-07	0.00133997	1.59e-05	3.24098e-07	9.30146e-07	0.0227599	4.64361e-05	2.95288e-06		bcin_chr_5:2,110,811..2,111,734(+)		Zinc finger C2H2-type;Zinc finger C2H2 superfamily		Zinc finger C2H2-type	Zinc finger C2H2 superfamily
521	Bcin05g06180	Vir	17	0.0133973	0.0170736	5.56179e-05	-0.0263465		1.49623e-06	0.0140355	2.98059e-05	9.34403e-07	-8.08792e-07	-0.00817751	5.13746e-05	2.43229e-06		bcin_chr_5:2,115,121..2,117,927(+)							integral component of membrane
522	Bcin05g06220	Vir	93	0.218211	-0.00976745	0.0359299	0.0326198		-3.97019e-07	-0.00240014	1.23516e-05	1.80266e-07	8.41501e-07	0.0113893	1.74918e-05	5.03516e-07		bcin_chr_5:2,129,255..2,136,627(+)	Bcpks15	Thioesterase;Phosphopantetheine attachment site;Phosphopantetheine binding ACP domain;Beta-ketoacyl synthase, N-terminal;Beta-ketoacyl synthase, C-terminal;Acyl transferase;Acyl transferase/acyl hydrolase/lysophospholipase;Malonyl-CoA ACP transacylase, ACP-binding;Thiolase-like;Polyketide synthase, acyl transferase domain;Polyketide synthase, phosphopantetheine-binding domain;Polyketide synthase,…	Beta-ketoacyl synthase, N-terminal;Phosphopantetheine binding ACP domain;Acyl transferase;Thioesterase;Beta-ketoacyl synthase, C-terminal;Polyketide synthase, dehydratase domain;Starter unit:ACP transacylase	Polyketide synthase, phosphopantetheine-binding domain;Polyketide synthase, beta-ketoacyl synthase domain;Polyketide synthase, acyl transferase domain	ACP-like superfamily;Acyl transferase/acyl hydrolase/lysophospholipase;Alpha/Beta hydrolase fold;Thiolase-like;Malonyl-CoA ACP transacylase, ACP-binding	Polyketide product template domain		catalytic activity;hydrolase activity, acting on ester bonds;phosphopantetheine binding;transferase activity	biosynthetic process	2.3.1.39 ([Acyl-carrier-protein] S-malonyltransferase)
523	Bcin05g06360	Vir	45	0.117987	-0.00543771	0.0526007	0.0453256		4.76604e-07	0.00458455	2.13756e-05	5.8749e-07	1.23423e-06	0.0258441	6.47439e-05	4.31715e-06		bcin_chr_5:2,187,236..2,189,300(+)		Galactose oxidase/kelch, beta-propeller			Galactose oxidase/kelch, beta-propeller		integral component of membrane	protein binding
524	Bcin05g06410	Vir	10	0.33076	0.0100346	0.349559	-0.0269431		5.25376e-07	0.00228032	2.255e-05	5.31568e-07	-9.54387e-07	-0.0104523	9.44947e-05	5.73902e-06		bcin_chr_5:2,208,198..2,211,839(-)	Bcmsb1	Domain of unknown function DUF1708;Meiotically up-regulated protein Msb1/Mug8	Domain of unknown function DUF1708
525	Bcin05g06470	Vir	8	0.193033	-0.0149472	0.0835866	0.0478102		-7.87918e-08	-0.00213736	1.02125e-05	9.86811e-08	6.90334e-07	0.0159552	3.04079e-05	1.60072e-06		bcin_chr_5:2,225,370..2,226,432(+)							integral component of membrane
526	Bcin05g06500	Vir	52	0.483228	-0.0139449	0.0773879	0.0654136		3.21361e-07	0.00234219	1.20058e-05	1.64393e-07	9.00211e-07	0.00863669	1.55243e-05	3.84967e-07		bcin_chr_5:2,229,989..2,232,387(+)		Phytanoyl-CoA dioxygenase	Phytanoyl-CoA dioxygenase					dioxygenase activity		1.14.11.- (With 2-oxoglutarate as one donor, and incorporation of one atom each of oxygen into both donors.)
527	Bcin05g06630	Vir	22	0.455637	0.0038496	0.180241	-0.0123021		2.01309e-07	0.00239894	1.29045e-05	1.85938e-07	-4.38352e-07	-0.00327444	1.76842e-05	4.83583e-07		bcin_chr_5:2,274,253..2,276,199(-)		Cytochrome P450;Cytochrome P450, E-class, group I;Cytochrome P450 superfamily	Cytochrome P450		Cytochrome P450 superfamily		integral component of membrane	heme binding;iron ion binding;oxidoreductase activity, acting on paired donors, with incorporation or reduction of molecular oxygen	oxidation-reduction process;pathogenesis	1.14.-.- (Acting on paired donors, with incorporation or reduction of molecular oxygen. The oxygen incorporated need not be derived from O(2).)
528	Bcin05g06670	Vir	23	0.540078	-0.000210544	0.122281	0.0118635		6.81095e-07	0.00534819	1.75652e-05	3.98716e-07	-6.37253e-07	-0.0064781	2.18673e-05	8.36545e-07		bcin_chr_5:2,293,594..2,294,486(-)
529	Bcin05g06880	Vir	16	0.359049	0.0015273	0.125414	-0.0188631		-4.53779e-07	-0.00519834	1.57125e-05	2.90424e-07	-3.1834e-07	-0.0016581	1.51513e-05	2.98284e-07		bcin_chr_5:2,385,169..2,389,985(-)		Protein kinase domain;Serine/threonine-protein kinase, active site;Protein kinase-like domain superfamily;Protein kinase, ATP binding site	Protein kinase domain	Protein kinase domain	Protein kinase-like domain superfamily			ATP binding;protein kinase activity	protein phosphorylation	2.7.11.1 (Non-specific serine/threonine protein kinase)
530	Bcin05g06910	Vir	5	0.713654	0.00206406	0.571586	0.0038274		8.49756e-08	0.000409081	1.028e-05	1.31591e-07	8.4556e-07	0.0075641	1.31368e-05	2.32705e-07		bcin_chr_5:2,404,240..2,408,265(-)		Nucleotide-diphospho-sugar transferases			Nucleotide-diphospho-sugar transferases		integral component of membrane			2.4.1.- (Hexosyltransferases.)
531	Bcin05g07300	Vir	4	0.284396	0.0112262	0.1809	-0.0172278		8.47116e-07	0.00566472	1.4e-05	1.40199e-07	-6.48006e-07	-0.010005	2.43684e-05	9.54178e-07		bcin_chr_5:2,578,389..2,580,824(-)							integral component of membrane
532	Bcin05g07330	Spe	9	0.33175	-0.000763815	0.159308	0.00246635		-1.71218e-07	-0.000693429	9.66667e-06	8.53566e-08	-3.95653e-08	-0.000366369	9.49708e-06	6.87443e-08		bcin_chr_5:2,591,358..2,593,657(+)							integral component of membrane
533	Bcin05g07340	Spe	16	0.160248	-0.0173954	0.134486	0.0479723		-1.08047e-06	-0.00371725	2.44937e-05	8.72473e-07	1.99052e-06	0.0195516	2.18487e-05	7.48808e-07		bcin_chr_5:2,595,033..2,598,417(+)		CDP-alcohol phosphatidyltransferase;Choline/ethanolamine phosphotransferase	CDP-alcohol phosphatidyltransferase				integral component of membrane;membrane	phosphotransferase activity, for other substituted phosphate groups	phospholipid biosynthetic process	2.7.8.1 (Ethanolaminephosphotransferase)
534	Bcin05g07470	Vir	20	0.467437	0.00079208	0.151089	-0.00603613		1.03909e-06	0.00912494	1.3785e-05	1.94725e-07	-1.12568e-06	-0.0158206	1.75789e-05	4.41656e-07		bcin_chr_5:2,643,927..2,645,699(+)		GC-rich sequence DNA-binding factor					nucleus	DNA binding	regulation of transcription, DNA-templated
535	Bcin05g07480	Vir	18	0.52761	-0.00130876	0.431871	-0.00593118		1.39953e-06	0.0133505	1.34333e-05	2.31549e-07	-2.24461e-06	-0.032463	3.68129e-05	2.00702e-06		bcin_chr_5:2,645,935..2,649,208(-)	Bccdc1	Calcineurin-like phosphoesterase domain, ApaH type;PGAP5/Cdc1/Ted1	Calcineurin-like phosphoesterase domain, ApaH type				integral component of membrane	hydrolase activity	GPI anchor biosynthetic process	3.5.99.6 (Glucosamine-6-phosphate deaminase)
536	Bcin05g07490	Vir	5	0.454786	0.0089309	0.327368	-0.0343564		1.89851e-06	0.0165084	1.736e-05	3.49781e-07	-2.69773e-06	-0.0475318	8.54737e-05	6.87742e-06		bcin_chr_5:2,649,279..2,651,133(-)		Metallo-beta-lactamase;Ribonuclease Z/Hydroxyacylglutathione hydrolase-like		Metallo-beta-lactamase	Ribonuclease Z/Hydroxyacylglutathione hydrolase-like
537	Bcin06g00022	Vir	19	0.480728	0.0012214	0.260422	-0.0202059		-8.20769e-07	-0.00616906	3.39737e-05	1.29241e-06	5.56408e-07	0.00388141	2.72798e-05	1.27552e-06		bcin_chr_6:20,376..22,438(-)		Zn(2)-C6 fungal-type DNA-binding domain;Zn(2)-C6 fungal-type DNA-binding domain superfamily	Zn(2)-C6 fungal-type DNA-binding domain	Zn(2)-C6 fungal-type DNA-binding domain	Zn(2)-C6 fungal-type DNA-binding domain superfamily		host cell nucleus;nucleus	DNA-binding transcription factor activity, RNA polymerase II-specific;zinc ion binding	regulation of transcription, DNA-templated
538	Bcin06g00024	SpeVir	69	0.596243	-0.00399015	0.299908	-0.0209061		-2.15039e-06	-0.018121	4.76275e-05	2.29631e-06	2.04164e-06	0.0204044	3.39924e-05	1.97647e-06		bcin_chr_6:22,765..23,851(+)		Metallo-beta-lactamase;Ribonuclease Z/Hydroxyacylglutathione hydrolase-like	Metallo-beta-lactamase		Ribonuclease Z/Hydroxyacylglutathione hydrolase-like					3.-.-.- (Hydrolases.)
539	Bcin06g00026	SpeVir	115	0.577434	-0.0078986	0.279419	-0.0221083		-2.56404e-06	-0.0211898	3.50278e-05	1.37707e-06	1.76681e-06	0.0149502	1.94316e-05	6.61215e-07		bcin_chr_6:24,572..26,113(+)		Major facilitator superfamily;MFS transporter superfamily	Major facilitator superfamily		MFS transporter superfamily		integral component of membrane	transmembrane transporter activity	transmembrane transport
540	Bcin06g00028	SpeVir	139	0.610709	-0.00280664	0.286881	-0.0208832		-1.89725e-06	-0.0148915	3.07777e-05	1.22651e-06	1.59477e-06	0.0148002	1.99538e-05	7.02885e-07		bcin_chr_6:26,330..28,778(-)		Alkyl sulfatase dimerisation domain;Alkyl sulfatase, C-terminal;SCP2 sterol-binding domain superfamily;Ribonuclease Z/Hydroxyacylglutathione hydrolase-like	Alkyl sulfatase dimerisation domain;Alkyl sulfatase, C-terminal		SCP2 sterol-binding domain superfamily;Ribonuclease Z/Hydroxyacylglutathione hydrolase-like			protein dimerization activity		3.1.6.- (Sulfuric ester hydrolases.)
541	Bcin06g00360	Vir	39	0.344032	0.0129163	0.31625	-0.0122801		7.17106e-07	0.00584382	1.55538e-05	2.88954e-07	-7.65706e-09	-0.00131234	1.87476e-05	5.38417e-07		bcin_chr_6:158,095..163,543(+)		ABC transporter-like;AAA+ ATPase domain;ABC transporter type 1, transmembrane domain;ABC transporter, conserved site;P-loop containing nucleoside triphosphate hydrolase;ABC transporter type 1, transmembrane domain superfamily	ABC transporter-like;ABC transporter type 1, transmembrane domain	AAA+ ATPase domain	P-loop containing nucleoside triphosphate hydrolase;ABC transporter type 1, transmembrane domain superfamily		integral component of membrane	ATP binding;ATPase activity;ATPase-coupled transmembrane transporter activity	transmembrane transport	3.6.3.44 (Transferred entry: 7.6.2.2)
542	Bcin06g00410	SpeVir	61	0.436172	-0.00473633	0.458259	-0.000188656		-7.69665e-07	-0.00553118	1.64984e-05	3.75649e-07	7.38218e-07	0.00741461	2.41311e-05	1.03136e-06		bcin_chr_6:181,036..183,071(+)		Tannase/feruloyl esterase;Alpha/Beta hydrolase fold	Tannase/feruloyl esterase		Alpha/Beta hydrolase fold			carboxylic ester hydrolase activity;metal ion binding		3.1.1.- (Carboxylic ester hydrolases.)
543	Bcin06g00620	Spe	5	0.370461	0.0169513	0.371917	-0.0346171		2.64509e-07	0.00112921	1.424e-05	2.16474e-07	-2.94967e-08	-0.0024766	1.17053e-05	2.09867e-07		bcin_chr_6:262,763..265,170(+)	Bctpp2	Peptidase S53, activation domain;Peptidase S8, subtilisin, Ser-active site;Sedolisin domain;Peptidase S8/S53 domain superfamily	Peptidase S53, activation domain	Peptidase S53, activation domain	Peptidase S8/S53 domain superfamily		extracellular space	metal ion binding;serine-type endopeptidase activity;serine-type peptidase activity	proteolysis	3.4.-.- (Acting on peptide bonds (peptidases).)
544	Bcin06g00750	SpeVir	16	0.346796	-0.00851166	0.380921	0.0134765		-5.51622e-07	-0.00261582	1.84937e-05	4.8091e-07	7.76084e-07	0.00507426	1.36776e-05	2.56497e-07		bcin_chr_6:302,269..303,348(-)		Isochorismatase-like;Isochorismatase-like superfamily	Isochorismatase-like		Isochorismatase-like superfamily			catalytic activity
545	Bcin06g00760	Vir	34	0.448175	0.00490553	0.283727	-0.0159689		-3.23462e-08	-4.24803e-05	1.18382e-05	1.58498e-07	-1.75017e-07	-0.000442645	1.58854e-05	4.36194e-07		bcin_chr_6:306,221..306,748(-)		RNA recognition motif domain;RNA-binding domain superfamily	RNA recognition motif domain		RNA-binding domain superfamily			RNA binding;nucleic acid binding
546	Bcin06g00840	Vir	14	0.54472	0.00350701	0.461728	-0.00814378		5.44205e-07	0.00433617	1.325e-05	2.24203e-07	-8.39205e-07	-0.00947277	3.04511e-05	1.43346e-06		bcin_chr_6:327,473..331,505(+)		Zn(2)-C6 fungal-type DNA-binding domain;Transcription factor domain, fungi;Zn(2)-C6 fungal-type DNA-binding domain superfamily	Zn(2)-C6 fungal-type DNA-binding domain;Transcription factor domain, fungi	Zn(2)-C6 fungal-type DNA-binding domain;Transcription factor domain, fungi	Zn(2)-C6 fungal-type DNA-binding domain superfamily		host cell nucleus;nucleus	DNA binding;DNA-binding transcription factor activity, RNA polymerase II-specific;zinc ion binding	regulation of transcription, DNA-templated;transcription, DNA-templated
547	Bcin06g00880	Vir	37	0.465381	0.00123519	0.345345	-0.00690817		-1.17442e-07	0.000116927	1.25243e-05	1.58647e-07	2.93687e-07	0.00267238	2.0845e-05	6.82398e-07		bcin_chr_6:338,839..340,383(-)
548	Bcin06g00890	Vir	31	0.439408	-0.00304374	0.316463	0.00187755		-4.92669e-08	-0.00105865	1.21097e-05	1.74613e-07	-1.86937e-07	-0.00152238	1.89236e-05	5.47074e-07		bcin_chr_6:340,541..342,676(-)		FAD linked oxidase, N-terminal;Berberine/berberine-like;FAD-binding, type PCMH-like superfamily	FAD linked oxidase, N-terminal;Berberine/berberine-like		FAD-binding, type PCMH-like superfamily			FAD binding;flavin adenine dinucleotide binding;oxidoreductase activity	oxidation-reduction process	1.1.1.- (With NAD(+) or NADP(+) as acceptor.)
549	Bcin06g00940	Vir	30	0.278856	0.00303468	0.296248	-0.0172284		-8.75092e-08	0.000741757	1.592e-05	3.8164e-07	-3.95393e-07	-0.00605164	3.15825e-05	1.31273e-06		bcin_chr_6:351,402..352,649(+)
550	Bcin06g00980	Vir	33	0.418847	-0.010183	0.203986	0.0343713		-6.04549e-07	-0.003887	1.43424e-05	2.6955e-07	1.17504e-06	0.0108491	1.66986e-05	4.16994e-07		bcin_chr_6:365,855..368,520(+)		Heterokaryon incompatibility	Heterokaryon incompatibility
551	Bcin06g00990	Spe	8	0.520708	-0.0149367	0.221557	-0.018151		-1.44981e-06	-0.0076549	1.075e-05	1.57493e-07	-2.37979e-07	-0.00471577	1.66974e-05	4.27207e-07		bcin_chr_6:372,774..373,983(+)							integral component of membrane
552	Bcin06g01070	Vir	6	0.43069	0.0063652	0.243578	-0.0125702		1.31905e-07	0.00248242	1.26667e-05	1.34221e-07	-3.10076e-07	0.000613457	1.9807e-05	7.45951e-07		bcin_chr_6:403,999..405,681(-)		Putative amidoligase enzyme	Putative amidoligase enzyme
553	Bcin06g01100	Vir	7	0.412945	-0.010762	0.100789	0.0485206		-2.66111e-07	0.000232457	1.22857e-05	1.50889e-07	1.0409e-06	0.0202827	3.01053e-05	1.55723e-06		bcin_chr_6:410,035..411,239(-)	Bcmrp2	Ribosomal protein S14;Ribosomal protein S14, conserved site	Ribosomal protein S14				ribosome	structural constituent of ribosome	translation
554	Bcin06g01180	Vir	24	0.339573	0.00223359	0.104137	-0.00667861		-4.65391e-08	-0.0019831	1.21917e-05	1.28982e-07	-7.71075e-08	0.00146809	2.16053e-05	8.88647e-07		bcin_chr_6:430,726..432,971(-)	BccatA	Catalase immune-responsive domain;Catalase core domain;Catalase, mono-functional, haem-containing;Catalase superfamily;Catalase active site	Catalase core domain;Catalase immune-responsive domain	Catalase core domain	Catalase superfamily			catalase activity;heme binding;metal ion binding	hydrogen peroxide catabolic process;oxidation-reduction process;response to oxidative stress	1.11.1.6 (Catalase)
555	Bcin06g01210	Vir	22	0.274748	0.0135924	0.0763942	-0.0290803		9.22606e-07	0.00569572	1.61227e-05	3.05793e-07	-1.58051e-06	-0.0171112	3.85742e-05	1.82565e-06		bcin_chr_6:439,869..443,698(+)
556	Bcin06g01250	Vir	39	0.398167	-0.00108246	0.419338	-0.00552724		-5.4663e-07	-0.00429692	1.30487e-05	1.8119e-07	5.54092e-07	0.00624208	2.42726e-05	8.94767e-07		bcin_chr_6:454,039..457,274(+)
557	Bcin06g01320	Vir	36	0.258937	0.000944815	0.18582	0.00126931		1.32901e-07	0.000205882	1.10194e-05	1.45821e-07	-1.63046e-07	3.08673e-05	2.12778e-05	7.09997e-07		bcin_chr_6:475,458..479,402(-)	Bcrtt10	WD40 repeat;WD40 repeat, conserved site;WD40-repeat-containing domain superfamily	WD40 repeat	WD40 repeat	WD40-repeat-containing domain superfamily			protein binding
558	Bcin06g01360	Vir	19	0.110502	-0.00574576	0.0891431	0.0152309		9.31738e-08	-0.000595308	1.50947e-05	2.6182e-07	-1.60236e-07	0.00167496	2.05097e-05	6.62426e-07		bcin_chr_6:485,717..488,322(+)	Bciks1	Protein kinase domain;Serine/threonine-protein kinase, active site;Protein kinase-like domain superfamily	Protein kinase domain	Protein kinase domain	Protein kinase-like domain superfamily			ATP binding;protein kinase activity	protein phosphorylation	2.7.11.1 (Non-specific serine/threonine protein kinase)
559	Bcin06g01370	Vir	14	0.335106	0.0177293	0.134911	-0.0396293		8.05779e-07	0.00477005	1.155e-05	1.47251e-07	-1.09733e-06	-0.00890154	1.5406e-05	3.54063e-07		bcin_chr_6:491,435..494,584(+)		Peptidase S8/S53 domain;Peptidase S8, subtilisin-related;Peptidase S8/S53 domain superfamily	Peptidase S8/S53 domain		Peptidase S8/S53 domain superfamily			serine-type endopeptidase activity;serine-type peptidase activity	proteolysis	3.4.21.- (Serine endopeptidases.)
560	Bcin06g01430	Vir	13	0.286687	-0.00636519	0.236658	0.00418768		-4.53643e-07	-0.00327767	1.07462e-05	1.12096e-07	-4.95809e-08	0.00302653	1.3749e-05	4.23257e-07		bcin_chr_6:510,532..511,884(-)							integral component of membrane
561	Bcin06g01600	Vir	5	0.426144	0.00279614	0.188812	-0.0171705		3.95997e-07	0.00160519	1.014e-05	8.33371e-08	-1.43051e-06	-0.0101182	4.33895e-05	2.13233e-06		bcin_chr_6:575,789..577,914(+)		Glycoside hydrolase, family 43;Glycosyl hydrolase, five-bladed beta-propellor domain superfamily	Glycoside hydrolase, family 43		Glycosyl hydrolase, five-bladed beta-propellor domain superfamily			hydrolase activity, hydrolyzing O-glycosyl compounds	carbohydrate metabolic process	3.2.1.145 (Galactan 1,3-beta-galactosidase)
562	Bcin06g01670	Vir	28	0.539618	0.00243262	0.336602	-0.00975521		-1.25892e-07	-0.000694156	9.85714e-06	1.2066e-07	1.19108e-07	0.000601288	1.59248e-05	4.52252e-07		bcin_chr_6:596,380..597,269(-)
563	Bcin06g01730	Vir	10	0.227706	-0.0224634	0.0276891	0.0578699		-1.58609e-07	-0.00160696	1.087e-05	1.10225e-07	3.61112e-08	0.000990539	2.21368e-05	8.7381e-07		bcin_chr_6:613,808..614,567(+)		Domain of unknown function DUF427	Domain of unknown function DUF427
564	Bcin06g01880	Vir	15	0.510722	-0.0076065	0.260225	0.0341389		4.48398e-08	-0.000202469	1.28867e-05	1.5298e-07	1.16218e-06	0.0104123	1.67018e-05	4.27657e-07		bcin_chr_6:652,106..653,343(-)
565	Bcin06g02060	Spe	60	0.0444011	-0.033938	0.0318115	0.0905892		-6.01879e-07	-0.00678046	1.7265e-05	3.71505e-07	1.3313e-06	0.0248969	2.04667e-05	7.00231e-07		bcin_chr_6:734,453..736,036(-)
566	Bcin06g02180	Vir	24	0.434612	-0.00454534	0.162825	0.0119051		-3.25301e-07	-0.00267295	1.14083e-05	1.40087e-07	5.46784e-07	0.00972812	5.68289e-05	3.86844e-06		bcin_chr_6:766,699..767,793(+)
567	Bcin06g02190	Vir	11	0.156266	-0.0181543	0.00417218	0.0668773		-4.94429e-07	-0.00343892	1.38091e-05	1.96746e-07	1.97032e-06	0.0354636	0.000148498	1.18209e-05		bcin_chr_6:767,796..770,420(-)		Amino acid/polyamine transporter I	Amino acid/polyamine transporter I				integral component of membrane;membrane	transmembrane transporter activity	transmembrane transport	2.1.1.314 (Diphthine methyl ester synthase)
568	Bcin06g02210	Vir	13	0.286092	0.00298073	0.172235	0.00615436		-9.19577e-08	-0.00119729	1.16077e-05	1.50195e-07	2.36339e-07	0.00529077	2.39595e-05	1.1446e-06		bcin_chr_6:775,775..777,541(+)		Nucleotide-sugar transporter	Nucleotide-sugar transporter				Golgi membrane;integral component of membrane	pyrimidine nucleotide-sugar transmembrane transporter activity	pyrimidine nucleotide-sugar transmembrane transport
569	Bcin06g02250	Vir	14	0.595309	-0.00463459	0.136835	0.0245335		2.07921e-07	0.00158373	1.04857e-05	1.34787e-07	3.99806e-07	0.00411747	1.29248e-05	2.4759e-07		bcin_chr_6:790,781..792,317(+)		MFS transporter superfamily			MFS transporter superfamily		integral component of membrane			2.7.1.4 (Fructokinase)
570	Bcin06g02510	Vir	19	0.243957	-0.0269921	0.199693	0.0616234		-4.83018e-07	-0.00558746	1.38632e-05	1.85459e-07	8.64414e-07	0.00804721	2.73241e-05	1.15041e-06		bcin_chr_6:867,884..870,306(+)		Peptidase S10, serine carboxypeptidase;Serine carboxypeptidase, serine active site;Alpha/Beta hydrolase fold;Serine carboxypeptidases, histidine active site	Peptidase S10, serine carboxypeptidase		Alpha/Beta hydrolase fold			serine-type carboxypeptidase activity	proteolysis	3.4.16.- (Serine-type carboxypeptidases.)
571	Bcin06g02530	Vir	16	0.381933	-0.00845137	0.180014	0.0199948		-5.48932e-08	-0.000130421	1.05187e-05	1.00169e-07	-1.70133e-08	0.00189153	2.38816e-05	1.0313e-06		bcin_chr_6:874,042..876,640(+)		Domain of unknown function DUF2235	Domain of unknown function DUF2235
572	Bcin06g02740	Vir	35	0.509856	-0.00332073	0.594047	-1.66491e-05		-1.13834e-06	-0.00670148	1.472e-05	2.67264e-07	1.44266e-06	0.0102743	5.21835e-05	2.96907e-06		bcin_chr_6:933,964..934,932(-)										2.7.1.12 (Gluconokinase)
573	Bcin06g02920	Vir	23	0.493528	-0.00869721	0.268228	0.00709483		-1.09072e-06	-0.00656044	1.12913e-05	1.58075e-07	9.74348e-07	0.00873444	1.63295e-05	3.83895e-07		bcin_chr_6:1,009,965..1,011,747(-)	Bcpex4	Ubiquitin-conjugating enzyme E2;Ubiquitin-conjugating enzyme/RWD-like	Ubiquitin-conjugating enzyme E2		Ubiquitin-conjugating enzyme/RWD-like					6.3.2.19 (Transferred entry: 2.3.2.23, 2.3.2.27 and 6.2.1.45)
574	Bcin06g02930	Vir	9	0.220883	-0.0159752	0.0954418	0.0206797		-7.48662e-07	-0.00439772	1.23333e-05	1.49372e-07	9.23238e-07	0.00886299	2.40468e-05	8.82066e-07		bcin_chr_6:1,012,074..1,016,095(-)
575	Bcin06g02940	Vir	14	0.367359	-0.0112408	0.103071	0.0311909		-5.6244e-07	-0.0031634	1.18286e-05	1.10096e-07	4.72567e-07	0.00720142	2.30526e-05	1.11023e-06		bcin_chr_6:1,020,521..1,023,473(+)
576	Bcin06g03270	Vir	12	0.192538	0.0118981	0.268896	-0.0377648		8.21482e-07	0.000416136	2.255e-05	6.50868e-07	-1.57933e-06	-0.0163364	3.11842e-05	1.1976e-06		bcin_chr_6:1,144,986..1,146,308(+)		Cyanovirin-N;Cyanovirin-N superfamily	Cyanovirin-N	Cyanovirin-N	Cyanovirin-N superfamily
577	Bcin06g03380	Vir	6	0.288703	-0.0152094	0.142773	0.0508387		8.43349e-07	0.00812749	1.25833e-05	2.02948e-07	-1.20427e-08	-0.00115811	1.08421e-05	9.99153e-08		bcin_chr_6:1,181,067..1,183,010(+)		FAD linked oxidase, N-terminal;FAD-binding, type PCMH-like superfamily;Delta(24)-sterol reductase	FAD linked oxidase, N-terminal		FAD-binding, type PCMH-like superfamily		integral component of membrane	FAD binding;delta24-sterol reductase activity;flavin adenine dinucleotide binding;oxidoreductase activity	oxidation-reduction process	1.3.1.72 (Delta(24)-sterol reductase)
578	Bcin06g03400	Vir	5	0.172766	-0.0173204	0.0414758	0.0439685		-4.70683e-07	-0.00336993	1.496e-05	2.36086e-07	8.62995e-07	0.0114972	1.96632e-05	6.38808e-07		bcin_chr_6:1,187,792..1,190,249(-)	Bcpef1	EF-hand domain;EF-hand domain pair;EF-Hand 1, calcium-binding site	EF-hand domain;EF-hand domain	EF-hand domain	EF-hand domain pair			calcium ion binding		3.4.22.52 (Calpain-1)
579	Bcin06g03440	Vir	8	0.135151	-0.0145194	0.0281261	0.0470668		2.15423e-07	-0.000722331	1.15375e-05	1.09877e-07	4.14537e-07	0.00597201	1.13684e-05	1.72841e-07		bcin_chr_6:1,201,039..1,202,912(+)	Bcaox	Alternative oxidase	Alternative oxidase				integral component of membrane;mitochondrial inner membrane;respirasome	alternative oxidase activity;metal ion binding	oxidation-reduction process	1.-.-.- (Oxidoreductases.)
580	Bcin06g03450	Vir	18	0.25288	-0.00252645	0.200348	-0.00126628		-1.25765e-07	-0.000869579	1.20222e-05	1.57183e-07	-1.80322e-07	0.000430496	1.78421e-05	4.67193e-07		bcin_chr_6:1,206,216..1,209,204(-)	Bcmef2	Elongation factor EFG, domain V-like;Transcription factor, GTP-binding domain;Translation elongation factor EFTu-like, domain 2;Small GTP-binding protein domain;Translation protein, beta-barrel domain superfamily;Elongation factor G, domain III;Ribosomal protein S5 domain 2-type fold;P-loop containing nucleoside triphosphate hydrolase;Ribosome-releasing factor 2, mitochondrial;Tr-type G domain, c…	Transcription factor, GTP-binding domain;Elongation factor EFG, domain V-like;Translation elongation factor EFTu-like, domain 2;Elongation Factor G, domain II	Elongation factor EFG, domain V-like	Translation protein, beta-barrel domain superfamily;P-loop containing nucleoside triphosphate hydrolase;Ribosomal protein S5 domain 2-type fold;EF-G domain III/V-like	Small GTP-binding protein domain	mitochondrion	GTP binding;GTPase activity	mitochondrial translation;ribosome disassembly	3.6.1.15 (Nucleoside-triphosphate phosphatase)
581	Bcin06g03510	Vir	19	0.415286	-0.0108429	0.55503	0.0105544		-1.23049e-06	-0.00996892	1.52263e-05	3.34323e-07	1.21535e-06	0.0111519	1.39446e-05	3.33132e-07		bcin_chr_6:1,229,538..1,232,182(+)		Basic-leucine zipper domain						DNA-binding transcription factor activity	regulation of transcription, DNA-templated
582	Bcin06g03610	Vir	29	0.425261	-0.00238953	0.646319	-0.00763155		-1.53014e-06	-0.0110132	2.86931e-05	9.40187e-07	1.3246e-06	0.0100893	2.53466e-05	9.81669e-07		bcin_chr_6:1,266,647..1,269,710(+)		Oligopeptide transporter, OPT superfamily	Oligopeptide transporter, OPT superfamily			Oligopeptide transporter, OPT superfamily	integral component of membrane		transmembrane transport
583	Bcin06g03620	Vir	14	0.440252	0.00900852	0.344925	-0.0271705		4.83206e-07	0.00635611	2.62786e-05	8.62707e-07	-4.98013e-07	-0.00471462	3.20827e-05	1.52719e-06		bcin_chr_6:1,270,330..1,272,073(+)
584	Bcin06g03670	Vir	7	0.187318	0.000270419	0.0783391	0.0165341		9.04234e-08	-0.000593366	1.06571e-05	1.03388e-07	5.22751e-07	0.0119995	2.09774e-05	7.2124e-07		bcin_chr_6:1,285,885..1,287,931(+)
585	Bcin06g03740	Vir	12	0.367605	-0.0110947	0.250068	0.054813		-7.38247e-07	-0.00676386	1.21e-05	1.88225e-07	1.81658e-06	0.0237209	1.96404e-05	7.11427e-07		bcin_chr_6:1,302,303..1,303,365(+)
586	Bcin06g03820	Vir	30	0.263467	0.000406538	0.101005	-0.0105488		1.43897e-07	0.000831798	1.08033e-05	1.07768e-07	-8.28675e-07	-0.00701586	1.47018e-05	3.99059e-07		bcin_chr_6:1,324,778..1,326,946(+)		Zn(2)-C6 fungal-type DNA-binding domain;Zn(2)-C6 fungal-type DNA-binding domain superfamily	Zn(2)-C6 fungal-type DNA-binding domain	Zn(2)-C6 fungal-type DNA-binding domain	Zn(2)-C6 fungal-type DNA-binding domain superfamily		host cell nucleus;nucleus	DNA-binding transcription factor activity, RNA polymerase II-specific;zinc ion binding	regulation of transcription, DNA-templated
587	Bcin06g03860	Vir	20	0.128043	-0.0214286	0.201079	0.0452673		-5.48068e-07	-0.00414709	2.0835e-05	5.4127e-07	4.5627e-07	0.00697859	2.67421e-05	1.19401e-06		bcin_chr_6:1,333,376..1,334,811(-)
588	Bcin06g03870	Vir	27	0.315085	0.00171883	0.248085	-0.00450933		9.99753e-08	-0.001249	1.65741e-05	3.87691e-07	-5.52031e-07	-0.00481267	3.27485e-05	1.52902e-06		bcin_chr_6:1,335,170..1,336,732(-)
589	Bcin06g04190	Vir	8	0.321223	0.0167525	0.104519	-0.0435567		9.1798e-08	0.000539665	1.11125e-05	1.04625e-07	-7.31626e-07	-0.00517403	1.06974e-05	1.26726e-07		bcin_chr_6:1,442,888..1,443,845(-)
590	Bcin06g04230	Vir	20	0.0377291	-0.0395169	0.0675516	0.0935713		-1.18956e-06	-0.0100634	1.2815e-05	2.02463e-07	1.73898e-06	0.023156	2.35053e-05	9.05915e-07		bcin_chr_6:1,449,864..1,451,369(-)		Peptidase M20;Peptidase M20, dimerisation domain;Amidohydrolase;Bacterial exopeptidase dimerisation domain	Peptidase M20;Peptidase M20, dimerisation domain		Bacterial exopeptidase dimerisation domain	Amidohydrolase	extracellular region	hydrolase activity;peptidase activity		3.5.1.14 (N-acyl-aliphatic-L-amino acid amidohydrolase)
591	Bcin06g04390	Vir	3	0.0443009	0.00551919	0.0654688	-0.00354781		-3.57387e-07	-0.00489816	9.56667e-06	1.2129e-07	3.40858e-07	0.00302372	9.22807e-06	1.03242e-07		bcin_chr_6:1,500,172..1,502,498(+)	Bcrho3	Small GTPase;Small GTP-binding protein domain;P-loop containing nucleoside triphosphate hydrolase	Small GTPase		P-loop containing nucleoside triphosphate hydrolase	Small GTP-binding protein domain		GTP binding;GTPase activity	small GTPase mediated signal transduction
592	Bcin06g04400	Vir	15	0.0330644	-0.027849	0.0165383	0.0631341		-1.40366e-06	-0.0153671	2.22467e-05	6.96651e-07	1.69317e-06	0.0258715	3.16e-05	1.45786e-06		bcin_chr_6:1,503,077..1,505,824(-)		Major intrinsic protein;Aquaporin-like	Major intrinsic protein		Aquaporin-like	Major intrinsic protein	integral component of membrane;membrane	channel activity	transmembrane transport	2.4.1.221 (Peptide-O-fucosyltransferase)
593	Bcin06g04410	Vir	45	0.148704	-0.00462015	0.0458898	0.0063994		-5.86248e-07	-0.00891817	2.36044e-05	7.89545e-07	4.08622e-07	0.00673713	2.02175e-05	6.66532e-07		bcin_chr_6:1,506,448..1,510,697(-)		AMP-dependent synthetase/ligase;AMP-binding, conserved site;ACP-like superfamily	AMP-dependent synthetase/ligase		ACP-like superfamily			catalytic activity
594	Bcin06g04430	Vir	11	0.0219621	-0.0224746	0.0266429	0.0451864		-1.43113e-06	-0.0177007	3.02182e-05	1.13268e-06	1.47517e-06	0.0213374	3.07273e-05	1.35935e-06		bcin_chr_6:1,515,231..1,517,350(-)		Protein kinase domain;Serine/threonine-protein kinase, active site;Protein kinase-like domain superfamily	Protein kinase domain	Protein kinase domain	Protein kinase-like domain superfamily			ATP binding;protein kinase activity	protein phosphorylation	2.7.11.23 ([RNA-polymerase]-subunit kinase)
595	Bcin06g04490	Vir	23	0.0929693	-0.0224414	0.0732266	0.0587169		-1.09176e-06	-0.010432	1.80348e-05	4.21959e-07	1.55945e-06	0.0254665	3.15149e-05	1.47079e-06		bcin_chr_6:1,526,644..1,531,750(-)	Bckmt6	SET domain	SET domain	SET domain				protein binding		2.1.1.356 ([Histone H3]-lysine(27) N-trimethyltransferase)
596	Bcin06g04500	Vir	9	0.0286289	-0.0234182	0.0713285	0.056782		-1.78475e-06	-0.0161955	2.28556e-05	6.59379e-07	1.77336e-06	0.019782	2.25731e-05	7.16919e-07		bcin_chr_6:1,531,798..1,536,542(+)	lacB	Glycoside hydrolase, family 35;Galactose-binding-like domain superfamily;Glycoside hydrolase superfamily;Beta-galactosidase, domain 2;Beta-galactosidase jelly roll domain;Beta-galactosidase, domain 3;Glycoside hydrolase 35, catalytic domain;Beta-galactosidase, domain 3 superfamily	Glycoside hydrolase 35, catalytic domain;Beta-galactosidase, domain 2;Beta-galactosidase, domain 3;Beta-galactosidase jelly roll domain	Beta-galactosidase, domain 2	Beta-galactosidase, domain 3 superfamily;Galactose-binding-like domain superfamily;Glycoside hydrolase superfamily		extracellular region	beta-galactosidase activity;hydrolase activity, hydrolyzing O-glycosyl compounds	carbohydrate metabolic process;polysaccharide catabolic process	3.2.1.23 (Beta-galactosidase)
597	Bcin06g04540	Vir	39	0.0622366	-0.0244975	0.0178345	0.0532067		-1.27589e-06	-0.0144057	2.25487e-05	6.63478e-07	1.54994e-06	0.0243628	2.94467e-05	1.32144e-06		bcin_chr_6:1,544,428..1,546,110(-)		O-methyltransferase domain;O-methyltransferase COMT-type;S-adenosyl-L-methionine-dependent methyltransferase;Winged helix DNA-binding domain superfamily	O-methyltransferase domain		Winged helix DNA-binding domain superfamily;S-adenosyl-L-methionine-dependent methyltransferase			O-methyltransferase activity	methylation	2.1.1.- (Methyltransferases.)
598	Bcin06g04550	Vir	12	0.0924308	0.0179065	0.120904	-0.0173369		8.07388e-07	0.00475689	1.46083e-05	2.31323e-07	-1.05713e-07	0.00337429	1.77018e-05	5.24309e-07		bcin_chr_6:1,549,331..1,550,745(+)		Zn(2)-C6 fungal-type DNA-binding domain;Fungal transcription factor;Zn(2)-C6 fungal-type DNA-binding domain superfamily	Zn(2)-C6 fungal-type DNA-binding domain;Fungal transcription factor	Zn(2)-C6 fungal-type DNA-binding domain	Zn(2)-C6 fungal-type DNA-binding domain superfamily		host cell nucleus;nucleus	DNA-binding transcription factor activity, RNA polymerase II-specific;zinc ion binding	regulation of transcription, DNA-templated
599	Bcin06g04560	Vir	105	0.00308068	-0.0546743	3.46929e-05	0.102903		-3.1246e-06	-0.0307036	3.25543e-05	1.15535e-06	3.7303e-06	0.049974	6.18927e-05	3.57565e-06		bcin_chr_6:1,554,098..1,556,504(+)		Glycoside hydrolase family 47;Seven-hairpin glycosidases	Glycoside hydrolase family 47		Seven-hairpin glycosidases		membrane	calcium ion binding;catalytic activity;mannosyl-oligosaccharide 1,2-alpha-mannosidase activity	protein glycosylation	3.2.1.- (Glycosidases, i.e. enzymes hydrolyzing O- and S-glycosyl compounds.)
600	Bcin06g04590	Vir	8	0.186675	-0.0132544	0.0230667	0.0310541		-6.88837e-07	-0.0114212	1.86e-05	5.04157e-07	7.29091e-07	0.0229666	4.71974e-05	2.9333e-06		bcin_chr_6:1,563,675..1,565,278(-)		Alcohol dehydrogenase, zinc-type, conserved site;GroES-like superfamily;Alcohol dehydrogenase, C-terminal;Alcohol dehydrogenase, N-terminal;Polyketide synthase, enoylreductase domain;NAD(P)-binding domain superfamily	Alcohol dehydrogenase, C-terminal;Alcohol dehydrogenase, N-terminal	Polyketide synthase, enoylreductase domain	GroES-like superfamily;NAD(P)-binding domain superfamily			oxidoreductase activity;zinc ion binding	oxidation-reduction process	1.1.1.2 (Alcohol dehydrogenase (NADP(+)))
601	Bcin06g04610	Vir	39	0.209224	0.00547303	0.0698052	-0.00707047		6.10118e-07	0.00169178	1.2759e-05	2.09053e-07	-2.17146e-07	-0.000616224	1.47827e-05	3.61878e-07		bcin_chr_6:1,566,615..1,569,123(-)		Zn(2)-C6 fungal-type DNA-binding domain;Zn(2)-C6 fungal-type DNA-binding domain superfamily	Zn(2)-C6 fungal-type DNA-binding domain	Zn(2)-C6 fungal-type DNA-binding domain	Zn(2)-C6 fungal-type DNA-binding domain superfamily		host cell nucleus;nucleus	DNA-binding transcription factor activity, RNA polymerase II-specific;zinc ion binding	regulation of transcription, DNA-templated
602	Bcin06g04620	SpeVir	37	0.218477	0.00755977	0.089481	-0.00533608		7.24365e-07	0.00205401	2.52216e-05	8.24948e-07	-3.43435e-07	0.000421675	1.86031e-05	6.84996e-07		bcin_chr_6:1,572,347..1,573,286(+)		F-box-like domain superfamily			F-box-like domain superfamily			protein binding
603	Bcin06g04640	Vir	19	0.182707	-0.00496138	0.126071	0.00257623		-4.359e-07	-0.0032287	1.44421e-05	2.73648e-07	4.01462e-07	0.00640036	5.07147e-05	2.70791e-06		bcin_chr_6:1,578,080..1,586,897(+)
604	Bcin06g04670	Vir	8	0.255674	-0.0164258	0.0753952	0.0500688		-2.29759e-07	-0.00273034	2.20875e-05	6.53737e-07	9.68249e-07	0.0219665	3.97105e-05	2.29278e-06		bcin_chr_6:1,596,549..1,597,998(+)							integral component of membrane
605	Bcin06g04770	SpeVir	23	0.19491	-0.00360253	0.227708	-0.00100025		-7.5134e-07	-0.0130027	3.58174e-05	1.50554e-06	7.76953e-07	0.0126848	2.89565e-05	1.20981e-06		bcin_chr_6:1,623,193..1,624,375(+)							integral component of membrane
606	Bcin06g04780	Spe	18	0.290778	-0.00526222	0.378955	-0.0170066		-7.24237e-07	-0.00891708	2.95278e-05	9.90772e-07	-2.63983e-07	-0.00219575	1.40702e-05	3.58058e-07		bcin_chr_6:1,624,798..1,625,785(+)
607	Bcin06g04790	Spe	22	0.152899	0.00674744	0.322964	-0.0144269		-5.42114e-08	-0.00434359	4.32364e-05	1.78978e-06	2.15407e-07	0.00232602	1.35311e-05	2.85072e-07		bcin_chr_6:1,626,303..1,627,264(+)
608	Bcin06g04970	Spe	17	0.253773	-0.00517878	0.0573869	0.0144802		-1.58496e-07	-0.00287058	1.72412e-05	4.46779e-07	2.87043e-07	0.00351665	1.85944e-05	5.22103e-07		bcin_chr_6:1,684,319..1,687,536(-)		IBR domain;Zinc finger, RING-type, conserved site;E3 ubiquitin ligase RBR family	IBR domain					metal ion binding;ubiquitin-protein transferase activity	protein ubiquitination	2.3.2.31 (RBR-type E3 ubiquitin transferase)
609	Bcin06g05070	Vir	19	0.334186	0.00608102	0.0982393	-0.0268708		4.65608e-07	0.00177173	1.27737e-05	2.22725e-07	-1.07316e-06	-0.0103535	7.72964e-05	5.53862e-06		bcin_chr_6:1,723,921..1,725,240(-)
610	Bcin06g05080	Vir	9	0.309481	0.0188892	0.28139	-0.0449756		8.09569e-07	0.0056659	1.68556e-05	3.89608e-07	-8.14594e-07	-0.0150722	6.60117e-05	4.18671e-06		bcin_chr_6:1,725,374..1,729,536(-)		Galactose oxidase/kelch, beta-propeller			Galactose oxidase/kelch, beta-propeller		integral component of membrane	protein binding
611	Bcin06g05090	Vir	13	0.414953	0.00762054	0.194818	-0.00972706		1.03337e-06	0.00572433	1.62923e-05	3.7034e-07	-1.16852e-06	-0.0147361	0.000182559	1.28978e-05		bcin_chr_6:1,729,652..1,731,209(+)		Dimeric alpha-beta barrel			Dimeric alpha-beta barrel
612	Bcin06g05100	Vir	40	0.576702	0.00092271	0.590414	-0.00485791		-1.3704e-06	-0.00904066	2.198e-05	6.04202e-07	1.33916e-06	0.0103342	4.92132e-05	2.64561e-06		bcin_chr_6:1,731,286..1,734,947(-)
613	Bcin06g05110	Vir	16	0.553571	-0.00745601	0.378567	0.0428231		-6.98017e-07	-0.00641362	1.84688e-05	4.04477e-07	2.10423e-06	0.0213206	3.51382e-05	1.70437e-06		bcin_chr_6:1,735,111..1,736,434(+)		Pirin, N-terminal domain;RmlC-like cupin domain superfamily	Pirin, N-terminal domain		RmlC-like cupin domain superfamily					1.13.11.24 (Quercetin 2,3-dioxygenase)
614	Bcin06g05120	Vir	32	0.488392	0.000251869	0.140199	0.0142494		7.0682e-07	0.00468687	1.34187e-05	2.13449e-07	-3.10326e-07	-0.00293646	2.32303e-05	8.07858e-07		bcin_chr_6:1,737,240..1,739,426(-)
615	Bcin06g05220	Spe	12	0.31699	-0.00627144	0.135132	0.0112588		1.90463e-07	0.00103845	1.1e-05	1.15921e-07	-2.53991e-07	0.0012123	1.84035e-05	6.01752e-07		bcin_chr_6:1,766,851..1,768,399(+)		GroES-like superfamily;Alcohol dehydrogenase, C-terminal;Alcohol dehydrogenase, N-terminal;NAD(P)-binding domain superfamily	Alcohol dehydrogenase, C-terminal;Alcohol dehydrogenase, N-terminal		GroES-like superfamily;NAD(P)-binding domain superfamily				oxidation-reduction process
616	Bcin06g05230	SpeVir	5	0.283868	-0.0154884	0.579533	0.00204225		-2.42829e-06	-0.0196454	2.616e-05	8.04221e-07	2.62397e-06	0.0195587	1.80211e-05	4.74215e-07		bcin_chr_6:1,774,070..1,777,326(-)		Zn(2)-C6 fungal-type DNA-binding domain;Zn(2)-C6 fungal-type DNA-binding domain superfamily	Zn(2)-C6 fungal-type DNA-binding domain	Zn(2)-C6 fungal-type DNA-binding domain	Zn(2)-C6 fungal-type DNA-binding domain superfamily		host cell nucleus;nucleus	DNA-binding transcription factor activity, RNA polymerase II-specific;zinc ion binding	regulation of transcription, DNA-templated
617	Bcin06g05240	Vir	4	0.0880003	-0.0301637	0.125655	0.0706368		-2.51365e-06	-0.0196563	2.185e-05	5.8257e-07	2.89447e-06	0.0287804	4.32895e-05	1.72704e-06		bcin_chr_6:1,789,294..1,793,152(+)		Organic solute transporter subunit alpha/Transmembrane protein 184	Organic solute transporter subunit alpha/Transmembrane protein 184				integral component of membrane
618	Bcin06g05250	Spe	23	0.380009	0.0065931	0.260476	-0.0247326		-3.09861e-09	-0.000769564	2.89087e-05	1.03923e-06	-3.66847e-07	-0.00471416	2.72723e-05	1.05154e-06		bcin_chr_6:1,794,874..1,796,343(-)		Putative amidoligase enzyme	Putative amidoligase enzyme
619	Bcin06g05280	Spe	13	0.443628	0.00222278	0.134954	0.0384517		1.60652e-06	0.017497	3.59769e-05	1.65818e-06	1.51424e-07	0.000667694	1.53927e-05	3.3013e-07		bcin_chr_6:1,806,397..1,807,254(-)							integral component of membrane			2.3.2.27 (RING-type E3 ubiquitin transferase)
620	Bcin06g05290	Vir	20	0.293567	-0.0107624	0.327242	0.0282646		-1.69227e-06	-0.00852944	1.3885e-05	2.4911e-07	2.45513e-06	0.021686	3.95947e-05	1.68415e-06		bcin_chr_6:1,809,308..1,811,494(+)		Major facilitator superfamily;MFS transporter superfamily	Major facilitator superfamily		MFS transporter superfamily		integral component of membrane	transmembrane transporter activity	transmembrane transport	3.1.3.8 (3-phytase)
621	Bcin06g05300	Vir	18	0.227462	-0.0188555	0.223915	0.0426563		-1.80386e-06	-0.0107085	1.34556e-05	2.40318e-07	2.50733e-06	0.020751	4.31462e-05	1.88092e-06		bcin_chr_6:1,811,986..1,815,633(+)	Bcmsh3	DNA mismatch repair protein MutS, C-terminal;DNA mismatch repair protein MutS-like, N-terminal;DNA mismatch repair protein MutS, core;DNA mismatch repair protein MutS, connector domain;DNA mismatch repair protein MutS, clamp;DNA mismatch repair protein MutS, N-terminal;DNA mismatch repair protein MutS/MSH;P-loop containing nucleoside triphosphate hydrolase;DNA mismatch repair protein MutS, core d…	DNA mismatch repair protein MutS, C-terminal;DNA mismatch repair protein MutS-like, N-terminal;DNA mismatch repair protein MutS, connector domain;DNA mismatch repair protein MutS, clamp;DNA mismatch repair protein MutS, core	DNA mismatch repair protein MutS, core;DNA mismatch repair protein MutS, C-terminal	DNA mismatch repair protein MutS, core domain superfamily;P-loop containing nucleoside triphosphate hydrolase;DNA mismatch repair protein MutS, N-terminal			ATP binding;mismatched DNA binding	mismatch repair	2.4.2.17 (ATP phosphoribosyltransferase)
622	Bcin06g05310	SpeVir	19	0.192357	-0.0096762	0.416903	0.0153445		-8.61731e-07	-0.00226896	5.38263e-05	2.64603e-06	6.5737e-07	0.00178412	3.47091e-05	1.71741e-06		bcin_chr_6:1,815,668..1,818,057(-)
623	Bcin06g05320	SpeVir	9	0.209907	-0.0220737	0.310032	0.0440379		-1.61849e-06	-0.0107254	2.50444e-05	7.52995e-07	1.6335e-06	0.0125559	2.52865e-05	9.85768e-07		bcin_chr_6:1,818,701..1,820,624(-)	Bcbet2	PFTB repeat;Terpenoid cyclases/protein prenyltransferase alpha-alpha toroid;Geranylgeranyl transferase type-2 subunit beta	PFTB repeat		Terpenoid cyclases/protein prenyltransferase alpha-alpha toroid		Rab-protein geranylgeranyltransferase complex	Rab geranylgeranyltransferase activity;catalytic activity;metal ion binding	protein geranylgeranylation	2.5.1.60 (Protein geranylgeranyltransferase type II)
624	Bcin06g05330	SpeVir	20	0.222542	0.0271814	0.253424	-0.0491348		1.73829e-06	0.0209969	7.1805e-05	3.63938e-06	-1.50708e-06	-0.0233671	5.04316e-05	2.68608e-06		bcin_chr_6:1,822,679..1,823,825(+)		Alpha/beta hydrolase fold-1;Alpha/Beta hydrolase fold	Alpha/beta hydrolase fold-1		Alpha/Beta hydrolase fold
625	Bcin06g05350	Vir	33	0.239136	-0.0117642	0.151823	0.0348712		-5.2572e-07	-0.00422357	1.53818e-05	2.98487e-07	8.41463e-07	0.00944126	2.93716e-05	1.25949e-06		bcin_chr_6:1,825,557..1,827,137(-)		Methyltransferase type 12;S-adenosyl-L-methionine-dependent methyltransferase	Methyltransferase type 12		S-adenosyl-L-methionine-dependent methyltransferase					2.1.1.- (Methyltransferases.)
626	Bcin06g05480	Vir	16	0.11893	-0.0373592	0.000700067	0.0884993		-7.092e-07	-0.0081795	1.59875e-05	2.88733e-07	4.44672e-07	0.00814868	1.15921e-05	2.45658e-07		bcin_chr_6:1,876,262..1,877,315(+)
627	Bcin06g05500	Vir	43	0.315201	-0.00772422	0.0679811	0.021616		-3.8481e-07	-0.00239327	1.37674e-05	2.48429e-07	4.04332e-07	0.00557895	1.68666e-05	4.71396e-07		bcin_chr_6:1,880,388..1,882,044(+)
628	Bcin06g05530	Vir	14	0.541082	-0.00335956	0.227457	0.0214965		8.01937e-07	0.00297171	1.20214e-05	1.65806e-07	-5.93298e-07	-0.00368504	1.45639e-05	2.75458e-07		bcin_chr_6:1,892,109..1,894,082(+)	Bcktr6	Glycosyl transferase, family 15;Nucleotide-diphospho-sugar transferases	Glycosyl transferase, family 15		Nucleotide-diphospho-sugar transferases		integral component of membrane;membrane	mannosyltransferase activity	protein glycosylation
629	Bcin06g05790	Spe	8	0.11913	0.0205337	0.0265004	-0.03283		1.94503e-06	0.015795	3.31875e-05	1.15992e-06	-1.70563e-06	-0.0176346	2.68421e-05	9.47571e-07		bcin_chr_6:1,984,487..1,986,223(+)							integral component of membrane
630	Bcin06g05810	Vir	6	0.274596	-0.00572799	0.109653	0.00697763		-4.7666e-07	-0.00434586	1.225e-05	1.38641e-07	1.68684e-08	0.0104183	2.24211e-05	7.35103e-07		bcin_chr_6:2,013,813..2,016,525(-)		RNA recognition motif domain;RNA recognition motif domain, eukaryote;U2 snRNP auxilliary factor, large subunit, splicing factor;RNA-binding domain superfamily	RNA recognition motif domain	RNA recognition motif domain;RNA recognition motif domain, eukaryote	RNA-binding domain superfamily	U2 snRNP auxilliary factor, large subunit, splicing factor	nucleus	RNA binding;nucleic acid binding	RNA splicing;mRNA processing
631	Bcin06g05840	Spe	28	0.283736	-0.00948493	0.255294	0.00438251		-9.11248e-07	-0.0087225	2.38393e-05	8.00223e-07	2.04854e-07	0.00104751	1.07707e-05	1.74362e-07		bcin_chr_6:2,020,494..2,026,471(+)	Bcrax2	Kelch-type beta propeller			Kelch-type beta propeller		integral component of membrane	protein binding
632	Bcin06g05910	Vir	17	0.420544	-0.00373591	0.129514	-0.0191484		-2.42461e-07	-0.00106355	1.32412e-05	1.03137e-07	-1.03332e-06	-0.0111025	2.20557e-05	7.6762e-07		bcin_chr_6:2,060,958..2,063,048(-)		Dimeric alpha-beta barrel			Dimeric alpha-beta barrel
633	Bcin06g06050	Spe	32	0.315876	-0.00194078	0.0887377	0.00231582		2.8302e-08	-0.000379697	1.17313e-05	1.20376e-07	-1.5338e-07	-0.000778481	1.32007e-05	2.387e-07		bcin_chr_6:2,117,965..2,119,743(+)
634	Bcin06g06320	Spe	2	0.00105859	0.0576108	0.00362448	-0.0728759		5.24147e-06	0.0397152	0.0001253	5.74947e-06	-3.18553e-06	-0.0283044	3.38947e-05	1.29479e-06		bcin_chr_6:2,191,048..2,192,911(-)	Bctrm82	WD40 repeat;tRNA (guanine-N(7)-)-methyltransferase non-catalytic subunit;WD40-repeat-containing domain superfamily		WD40 repeat	WD40-repeat-containing domain superfamily		nucleus	protein binding	RNA (guanine-N7)-methylation;tRNA methylation	4.1.1.37 (Uroporphyrinogen decarboxylase)
635	Bcin06g06330	Spe	2	0.442145	0.0371839	0.163561	-0.0446804		1.47222e-06	0.020632	8.075e-05	3.81821e-06	-8.60645e-07	-0.00771669	1.22632e-05	1.91334e-07		bcin_chr_6:2,193,024..2,194,295(+)	Bcrpp0	Ribosomal protein L10P;60S acidic ribosomal protein P0;60S ribosomal protein L10P, insertion domain;Ribosomal protein L10-like domain superfamily	Ribosomal protein L10P;60S ribosomal protein L10P, insertion domain		Ribosomal protein L10-like domain superfamily		ribosome		ribosome biogenesis	4.2.99.18 (DNA-(apurinic or apyrimidinic site) lyase)
636	Bcin06g06420	Vir	17	0.193208	-0.000825405	0.0389287	0.0135903		-3.6201e-08	-0.000107254	1.20588e-05	1.43054e-07	7.20207e-07	0.00702696	2.90155e-05	1.02235e-06		bcin_chr_6:2,248,078..2,250,470(+)		Tetracycline resistance protein/drug resistance transporter;Major facilitator superfamily;MFS transporter superfamily	Major facilitator superfamily		MFS transporter superfamily		integral component of membrane	transmembrane transporter activity	transmembrane transport	3.1.4.11 (Phosphoinositide phospholipase C)
637	Bcin06g06430	Vir	23	0.583885	0.00116155	0.341979	-0.00441451		4.0417e-09	-0.000486315	1.05478e-05	8.83456e-08	1.77817e-07	0.0014305	2.21602e-05	8.30283e-07		bcin_chr_6:2,252,011..2,254,078(-)		GroES-like superfamily;Alcohol dehydrogenase, N-terminal;Polyketide synthase, enoylreductase domain;NAD(P)-binding domain superfamily	Alcohol dehydrogenase, N-terminal	Polyketide synthase, enoylreductase domain	GroES-like superfamily;NAD(P)-binding domain superfamily			oxidoreductase activity	oxidation-reduction process	1.6.5.5 (NADPH:quinone reductase)
638	Bcin06g06480	Vir	37	0.416352	0.000740078	0.23029	-0.0149918		-4.48173e-09	-0.000429189	1.11892e-05	1.19412e-07	-7.45172e-07	-0.0097294	2.93457e-05	1.1368e-06		bcin_chr_6:2,271,141..2,276,444(-)	Bchox2	Homeobox domain;Homeobox KN domain;Homeobox-like domain superfamily;Zinc finger C2H2-type	Homeobox KN domain	Zinc finger C2H2-type;Homeobox domain	Homeobox-like domain superfamily		nucleus	DNA binding	regulation of transcription, DNA-templated
639	Bcin06g06520	Vir	17	0.185879	-0.0077312	0.0486924	0.040683		5.69091e-07	0.00309524	2.02647e-05	5.06576e-07	6.80104e-07	0.00540276	3.32755e-05	1.42418e-06		bcin_chr_6:2,288,866..2,290,968(+)		FAD linked oxidase, N-terminal;FAD-binding, type PCMH-like superfamily	FAD linked oxidase, N-terminal		FAD-binding, type PCMH-like superfamily			FAD binding;flavin adenine dinucleotide binding;oxidoreductase activity	oxidation-reduction process	1.5.3.6 ((R)-6-hydroxynicotine oxidase)
640	Bcin06g06630	Vir	9	0.298724	0.00235853	0.286526	-0.0194014		1.42573e-07	-0.00125628	2.02333e-05	4.57943e-07	-1.12522e-06	-0.0161786	3.7345e-05	1.90385e-06		bcin_chr_6:2,319,967..2,322,305(-)		Peptidase M19;Metal-dependent hydrolase	Peptidase M19		Metal-dependent hydrolase		integral component of membrane	metal ion binding;metallodipeptidase activity	proteolysis	3.4.13.19 (Membrane dipeptidase)
641	Bcin06g06650	Vir	9	0.184659	-0.0241991	0.000343982	0.0878209		7.36485e-07	0.00420647	9.25556e-06	1.06594e-07	7.88987e-07	0.00502399	1.36491e-05	1.82393e-07		bcin_chr_6:2,332,548..2,333,142(+)
642	Bcin06g06700	Vir	21	0.413361	-0.0110407	0.250783	0.0132705		3.45982e-07	0.00105081	1.13286e-05	8.93882e-08	-1.68031e-06	-0.0154437	2.58045e-05	1.03322e-06		bcin_chr_6:2,342,735..2,344,629(+)		Amino acid permease, conserved site;Amino acid permease/ SLC12A domain	Amino acid permease/ SLC12A domain				integral component of membrane;membrane		amino acid transport;transmembrane transport
643	Bcin06g06710	Vir	30	0.420628	-0.0142006	0.0704342	0.0540562		8.32953e-07	0.00435291	1.23267e-05	1.21292e-07	-3.87294e-07	-0.0031988	2.15123e-05	7.97826e-07		bcin_chr_6:2,347,710..2,349,018(-)
644	Bcin06g06720	Vir	2	0.597971	0.010519	0.175695	-0.0526198		-7.45534e-07	-0.00398236	1.76e-05	2.45746e-07	-4.03288e-07	-0.00503634	2.07368e-05	5.07576e-07		bcin_chr_6:2,351,131..2,352,420(-)	Bcnep1	Necrosis inducing protein	Necrosis inducing protein						pathogenesis
645	Bcin06g06910	Vir	6	0.455563	-0.00972684	0.145553	0.00820932		6.52415e-08	-0.000180439	9.38333e-06	8.49839e-08	-8.59826e-07	-0.00694809	1.28596e-05	1.87202e-07		bcin_chr_6:2,413,156..2,415,524(-)		Heterokaryon incompatibility	Heterokaryon incompatibility
646	Bcin06g06930	Vir	29	0.660013	-0.000228533	0.423338	0.00313657		-4.18739e-08	-0.00077951	1.07414e-05	1.39645e-07	3.54118e-07	0.00240423	1.10635e-05	1.49444e-07		bcin_chr_6:2,422,306..2,425,054(+)	Bcrad7	Leucine-rich repeat, cysteine-containing subtype		Leucine-rich repeat, cysteine-containing subtype
647	Bcin06g06950	Vir	49	0.115135	0.00718652	0.33033	-0.00964389		3.89313e-08	-0.0034321	1.50694e-05	3.20287e-07	6.46613e-07	0.00440831	1.46058e-05	3.81358e-07		bcin_chr_6:2,427,587..2,429,135(+)
648	Bcin06g07040	Vir	180	0.560567	-0.00851324	0.0429717	0.0452408		6.59099e-08	0.00046874	9.13278e-06	6.30967e-08	1.6444e-06	0.0110498	1.5914e-05	3.90556e-07		bcin_chr_6:2,509,817..2,511,640(+)		Heterokaryon incompatibility	Heterokaryon incompatibility
649	Bcin06g07090	Vir	12	0.355375	0.00250087	0.238061	0.00416706		2.5414e-08	-0.000660323	1.35167e-05	2.40149e-07	6.62209e-07	0.00202157	2.38333e-05	7.98989e-07		bcin_chr_6:2,519,602..2,522,478(-)		ATP-dependent RNA helicase DEAD-box, conserved site;Helicase, C-terminal;DEAD/DEAH box helicase domain;Helicase superfamily 1/2, ATP-binding domain;P-loop containing nucleoside triphosphate hydrolase	DEAD/DEAH box helicase domain;Helicase, C-terminal	Helicase superfamily 1/2, ATP-binding domain;Helicase, C-terminal	P-loop containing nucleoside triphosphate hydrolase			ATP binding;helicase activity;nucleic acid binding		3.6.4.13 (RNA helicase)
650	Bcin06g07120	Vir	19	0.232573	-0.0149491	0.154322	0.0245079		-2.81681e-07	-0.00461358	1.53053e-05	3.19528e-07	-3.73809e-07	0.00101517	2.05706e-05	8.66194e-07		bcin_chr_6:2,527,793..2,530,207(+)		FAD-binding domain;FAD/NAD(P)-binding domain superfamily	FAD-binding domain		FAD/NAD(P)-binding domain superfamily			FAD binding		1.14.13.1 (Salicylate 1-monooxygenase)
651	Bcin06g07140	Vir	34	0.363936	-0.0144496	0.497941	0.0302406		-1.69954e-06	-0.0123211	1.33029e-05	2.41624e-07	1.94306e-06	0.0172764	2.38576e-05	7.29317e-07		bcin_chr_6:2,533,222..2,534,893(+)							integral component of membrane
652	Bcin06g07160	Vir	39	0.428996	-0.00448023	0.524564	0.000337582		-1.01834e-06	-0.00838312	1.57282e-05	3.08658e-07	7.13483e-07	0.00700221	2.12281e-05	6.73371e-07		bcin_chr_6:2,537,913..2,539,894(-)		Peptidase S58, DmpA;ArgJ-like domain superfamily	Peptidase S58, DmpA		ArgJ-like domain superfamily			aminopeptidase activity		2.3.1.- (Transferring groups other than amino-acyl groups.)
653	Bcin06g07170	Vir	21	0.453184	0.0159541	0.178447	0.00331242		1.66754e-06	0.00904934	1.57286e-05	2.91695e-07	-3.56007e-07	-0.00488896	2.14085e-05	7.83344e-07		bcin_chr_6:2,540,612..2,542,685(-)
654	Bcin06g07350	Spe	21	0.400027	0.00520329	0.183369	-0.0211515		1.6213e-07	0.00230081	2.42476e-05	7.86704e-07	-3.11948e-07	-0.00550498	1.79449e-05	4.74834e-07		bcin_chr_6:2,606,938..2,608,676(-)		Class II aldolase/adducin N-terminal;Class II aldolase/adducin N-terminal domain superfamily	Class II aldolase/adducin N-terminal	Class II aldolase/adducin N-terminal	Class II aldolase/adducin N-terminal domain superfamily					4.1.2.17 (L-fuculose-phosphate aldolase)
655	Bcin06g07390	Vir	16	0.623012	-0.000566461	0.0777076	0.0393671		1.3786e-06	0.00965215	1.14812e-05	1.89104e-07	2.85709e-07	0.00389607	1.82434e-05	5.63057e-07		bcin_chr_6:2,618,930..2,623,417(+)		Armadillo-type fold;Tubulin-specific chaperone D, C-terminal;Tubulin-folding cofactor D	Tubulin-specific chaperone D, C-terminal		Armadillo-type fold			GTPase activator activity;beta-tubulin binding	post-chaperonin tubulin folding pathway;tubulin complex assembly
656	Bcin06g07490	Vir	9	0.0276012	-0.031343	0.000813248	0.0893155		-9.2934e-07	-0.00790941	1.47889e-05	2.5563e-07	1.30531e-06	0.0195124	2.3883e-05	9.00684e-07		bcin_chr_6:2,647,745..2,649,727(+)		O-methyltransferase domain;S-adenosyl-L-methionine-dependent methyltransferase;Winged helix DNA-binding domain superfamily	O-methyltransferase domain		Winged helix DNA-binding domain superfamily;S-adenosyl-L-methionine-dependent methyltransferase			O-methyltransferase activity	methylation
657	Bcin06g07540	Vir	22	0.0377348	-0.0407278	9.84321e-06	0.129359		-1.72144e-06	-0.0173692	1.795e-05	3.84867e-07	2.9249e-06	0.0533265	6.32727e-05	4.16788e-06		bcin_chr_6:2,659,504..2,661,618(-)
658	Bcin06g07550	Vir	37	0.0767035	-0.0348682	1.02774e-06	0.141388		-5.94961e-07	-0.00632115	1.25838e-05	1.45516e-07	2.93161e-06	0.0582404	5.85548e-05	3.66327e-06		bcin_chr_6:2,662,775..2,664,575(-)							integral component of membrane
659	Bcin06g07580	Vir	19	0.0143099	-0.0347753	0.000100617	0.0955192		-1.62458e-06	-0.0128919	2.21895e-05	5.80409e-07	2.55821e-06	0.0345659	4.12133e-05	1.96454e-06		bcin_chr_6:2,670,209..2,672,017(+)		FAD linked oxidase, N-terminal;FAD-binding, type PCMH-like superfamily	FAD linked oxidase, N-terminal		FAD-binding, type PCMH-like superfamily			FAD binding;flavin adenine dinucleotide binding;oxidoreductase activity	oxidation-reduction process	1.5.3.6 ((R)-6-hydroxynicotine oxidase)
660	Bcin07g00350	Vir	16	0.0397198	-0.0391243	2.02033e-06	0.128943		-9.66405e-07	-0.00739801	1.145e-05	1.46038e-07	3.40699e-06	0.053899	7.44342e-05	4.6947e-06		bcin_chr_7:121,949..123,820(+)
661	Bcin07g00360	Vir	9	0.0320135	-0.0391129	0.000106969	0.115442		-1.4415e-06	-0.0095816	1.28556e-05	1.64729e-07	3.14181e-06	0.0443358	6.00702e-05	3.46616e-06		bcin_chr_7:124,465..125,148(+)
662	Bcin07g00410	Vir	6	0.350405	0.018281	0.127955	-0.0433861		4.97381e-07	0.00196446	1.06167e-05	8.04245e-08	-8.78339e-07	-0.00455305	1.06842e-05	1.0991e-07		bcin_chr_7:152,556..153,502(-)		DASH complex subunit Spc34	DASH complex subunit Spc34				DASH complex;cytoplasm;spindle microtubule		attachment of spindle microtubules to kinetochore;cell division
663	Bcin07g00780	Vir	22	0.0492878	-0.0363323	0.00420533	0.100437		-8.65636e-07	-0.00772663	1.20636e-05	1.62741e-07	1.62531e-06	0.0236662	2.0378e-05	6.78224e-07		bcin_chr_7:288,700..289,874(-)
664	Bcin07g00880	Vir	15	0.0773006	-0.0380729	0.0546284	0.0885346		-1.27649e-06	-0.012603	1.58333e-05	3.18967e-07	1.18273e-06	0.015246	1.86175e-05	5.30191e-07		bcin_chr_7:312,651..314,886(-)
665	Bcin07g00900	Spe	26	0.180018	-0.0362985	0.0269679	0.0591779		-2.20731e-06	-0.0245278	3.02808e-05	1.27141e-06	1.4358e-06	0.0186855	1.80648e-05	5.49385e-07		bcin_chr_7:323,758..325,321(-)		Histidine phosphatase superfamily, clade-1;Histidine phosphatase superfamily	Histidine phosphatase superfamily, clade-1	Histidine phosphatase superfamily, clade-1	Histidine phosphatase superfamily					3.1.3.- (Phosphoric monoester hydrolases.)
666	Bcin07g00930	SpeVir	41	0.107029	-0.0329176	0.0388254	0.0365079		-1.73975e-06	-0.0174543	2.78561e-05	1.1096e-06	3.90371e-07	0.00738827	2.67959e-05	1.11001e-06		bcin_chr_7:333,011..335,467(+)
667	Bcin07g01310	Spe	20	0.14244	-0.0233025	0.102489	0.0308274		-1.79627e-06	-0.0189774	5.608e-05	2.61523e-06	5.33796e-07	0.00507855	1.07895e-05	1.48426e-07		bcin_chr_7:481,367..484,742(-)		Domain of unknown function DUF4210;Protein FAM214/SPAC3H8.04, C-terminal	Protein FAM214/SPAC3H8.04, C-terminal;Domain of unknown function DUF4210	Domain of unknown function DUF4210
668	Bcin07g01770	Vir	26	0.411116	-0.000943081	0.176801	0.0172074		-1.08723e-07	-0.000690252	1.00731e-05	7.87267e-08	1.21123e-06	0.0102593	3.40648e-05	1.32554e-06		bcin_chr_7:654,888..657,255(-)										2.7.1.26 (Riboflavin kinase)
669	Bcin07g01880	Vir	62	0.482086	-0.00159755	0.243674	0.0151951		2.31292e-07	2.81384e-05	1.04935e-05	1.1186e-07	2.20731e-07	0.00169235	1.3944e-05	3.00312e-07		bcin_chr_7:703,545..708,747(-)										1.3.1.74 (2-alkenal reductase (NAD(P)(+)))
670	Bcin07g01920	Vir	12	0.45968	0.0154293	0.091553	-0.0422877		1.18124e-06	0.00642105	1.24667e-05	1.94931e-07	-2.09053e-06	-0.0202156	5.18596e-05	2.71643e-06		bcin_chr_7:719,109..721,283(+)	Bchat1	Acyl-CoA N-acyltransferase;Histone acetyltransferase type B, catalytic subunit;Histone acetyl transferase HAT1 N-terminal	Histone acetyl transferase HAT1 N-terminal		Acyl-CoA N-acyltransferase		chromosome, telomeric region;cytoplasm;nucleus	histone acetyltransferase activity	cellular response to DNA damage stimulus;chromatin organization;chromatin silencing at telomere;histone acetylation	2.3.1.48 (Histone acetyltransferase)
671	Bcin07g01930	Vir	8	0.379069	0.00196744	0.310746	0.00868662		2.27732e-07	0.00163195	1.12e-05	1.34904e-07	2.15629e-07	0.00182473	1.18026e-05	1.66846e-07		bcin_chr_7:721,860..723,919(+)		CTD kinase subunit gamma Ctk3, C-terminal;CTD kinase subunit gamma Ctk3, N-terminal;CTD kinase subunit gamma	CTD kinase subunit gamma Ctk3, N-terminal;CTD kinase subunit gamma Ctk3, C-terminal				CTDK-1 complex		positive regulation of DNA-templated transcription, elongation
672	Bcin07g01940	Vir	27	0.396789	-0.00383496	0.130199	0.00656811		6.14857e-07	0.00332582	1.09593e-05	1.14511e-07	-6.15977e-07	-0.00328505	1.36452e-05	2.09678e-07		bcin_chr_7:727,425..727,859(-)
673	Bcin07g02040	Spe	25	0.136347	-0.0158764	0.0784587	0.0261967		-7.98432e-07	-0.00764941	1.42e-05	2.62705e-07	2.61267e-07	0.0016171	1.05937e-05	1.16748e-07		bcin_chr_7:754,353..756,166(-)
674	Bcin07g02050	Spe	9	0.103543	-0.0054462	0.160627	0.0149327		3.17375e-07	-0.00490743	1.77556e-05	4.11092e-07	-2.34168e-07	-0.00121345	1.23977e-05	1.69867e-07		bcin_chr_7:758,156..759,646(-)
675	Bcin07g02120	Vir	6	0.116077	-0.0166764	0.00936526	0.0428315		-5.13927e-07	-0.0037214	1.625e-05	2.41761e-07	1.33835e-06	0.0195032	3.77368e-05	1.91308e-06		bcin_chr_7:795,773..800,247(+)		Heat shock factor (HSF)-type, DNA-binding;Heat shock transcription factor family;Winged helix DNA-binding domain superfamily	Heat shock factor (HSF)-type, DNA-binding	Heat shock factor (HSF)-type, DNA-binding	Winged helix DNA-binding domain superfamily		host cell nucleus;nucleus	DNA-binding transcription factor activity;sequence-specific DNA binding	regulation of transcription, DNA-templated
676	Bcin07g02410	Vir	4	0.19436	0.00647704	0.104545	-0.0106493		-1.20279e-07	-0.00177003	1.165e-05	1.80447e-07	5.96831e-07	0.00463803	1.12632e-05	2.08647e-07		bcin_chr_7:902,919..906,935(+)	Bcmih1	M-phase inducer phosphatase;Rhodanese-like domain;Rhodanese-like domain superfamily	Rhodanese-like domain	Rhodanese-like domain	Rhodanese-like domain superfamily			protein tyrosine phosphatase activity	cell cycle;cell division;positive regulation of cell cycle G2/M phase transition;protein dephosphorylation	3.1.3.48 (Protein-tyrosine-phosphatase)
677	Bcin07g02750	Vir	30	0.471772	-0.003933	0.0842548	0.0184581		9.70573e-07	0.00668894	9.49e-06	1.4238e-07	3.79977e-08	0.00290781	1.85754e-05	7.44548e-07		bcin_chr_7:1,010,333..1,013,068(-)		AMP-dependent synthetase/ligase;Acetoacetyl-CoA synthase;AMP-binding, conserved site	AMP-dependent synthetase/ligase			Acetoacetyl-CoA synthase		acetoacetate-CoA ligase activity;catalytic activity	lipid metabolic process	6.2.1.16 (Acetoacetate--CoA ligase)
678	Bcin07g02950	Vir	3	0.500428	-0.0139437	0.25653	0.042389		2.542e-07	-0.000984065	1.06667e-05	9.89564e-08	-4.41071e-08	-0.0020691	7.36842e-06	6.35844e-08		bcin_chr_7:1,074,112..1,074,912(-)
679	Bcin07g03750	Spe	20	0.290621	0.0111109	0.0707795	0.00133286		1.08019e-06	0.00751219	1.513e-05	2.62789e-07	-3.258e-07	-0.00224412	1.24737e-05	2.06326e-07		bcin_chr_7:1,343,502..1,344,989(-)
680	Bcin07g03830	Vir	25	0.400622	-0.00100966	0.172794	-0.01325		-3.96386e-07	-0.00246717	1.1792e-05	1.66764e-07	-2.37587e-07	-0.00193308	1.32379e-05	1.71614e-07		bcin_chr_7:1,375,261..1,378,547(+)		Malic oxidoreductase;Malic enzyme, N-terminal domain;Malic enzyme, NAD-binding;NAD(P)-binding domain superfamily	Malic enzyme, N-terminal domain;Malic enzyme, NAD-binding	Malic enzyme, NAD-binding;Malic enzyme, N-terminal domain	NAD(P)-binding domain superfamily			NAD binding;malate dehydrogenase (decarboxylating) (NAD+) activity;malic enzyme activity;metal ion binding	oxidation-reduction process	1.1.1.38 (Malate dehydrogenase (oxaloacetate-decarboxylating))
681	Bcin07g04020	Vir	12	0.0617874	-0.0240528	0.0208207	0.0685165		-5.88795e-07	-0.00841822	1.82417e-05	3.92607e-07	5.97894e-07	0.0113789	1.35088e-05	2.74132e-07		bcin_chr_7:1,451,747..1,453,755(+)							integral component of membrane
682	Bcin07g04190	Spe	25	0.242618	0.0003972	0.0813741	-0.0087746		-2.05802e-07	-0.000922726	3.0008e-05	9.95264e-07	-2.1516e-07	-0.00161238	1.23579e-05	1.54425e-07		bcin_chr_7:1,503,470..1,504,732(+)		Zn(2)-C6 fungal-type DNA-binding domain;Zn(2)-C6 fungal-type DNA-binding domain superfamily			Zn(2)-C6 fungal-type DNA-binding domain superfamily		host cell nucleus;nucleus	DNA-binding transcription factor activity, RNA polymerase II-specific;zinc ion binding	regulation of transcription, DNA-templated
683	Bcin07g04210	Vir	30	0.389855	-0.0044239	0.132837	0.00112246		-5.10719e-07	-0.00416556	1.307e-05	1.97004e-07	1.49658e-07	0.00233115	1.46281e-05	3.23169e-07		bcin_chr_7:1,525,550..1,527,530(-)
684	Bcin07g04340	Spe	10	0.73866	-0.000428129	0.390946	-0.0018863		-2.26553e-07	0.00313444	4.681e-05	2.25503e-06	4.29492e-07	0.00505108	1.23263e-05	2.01618e-07		bcin_chr_7:1,566,657..1,569,683(-)
685	Bcin07g04360	Spe	30	0.242309	-0.000350392	0.165537	0.0515962		1.88114e-06	0.0194814	9.12633e-05	4.89889e-06	1.96637e-07	0.00484915	1.34702e-05	2.21234e-07		bcin_chr_7:1,574,739..1,576,429(+)		Histidine phosphatase superfamily, clade-1;Histidine phosphatase superfamily	Histidine phosphatase superfamily, clade-1	Histidine phosphatase superfamily, clade-1	Histidine phosphatase superfamily
686	Bcin07g04440	Vir	16	0.0894132	-0.0286049	0.0445749	0.0590508		-7.41801e-07	-0.00658927	2.31062e-05	6.53734e-07	8.18942e-07	0.0127258	2.33816e-05	1.00151e-06		bcin_chr_7:1,609,409..1,611,272(+)		Cell wall protein Sed1/Spi1						structural constituent of cell wall	fungal-type cell wall organization
687	Bcin07g04510	Spe	6	0.118211	-0.00672101	0.0273819	0.0360821		6.40443e-07	0.00265892	5.5e-05	2.25999e-06	3.10498e-07	0.0110054	1.57368e-05	4.37016e-07		bcin_chr_7:1,628,001..1,629,293(-)		DJ-1/PfpI;Class I glutamine amidotransferase-like	DJ-1/PfpI		Class I glutamine amidotransferase-like
688	Bcin07g04580	Vir	4	0.17371	0.0279259	0.296691	-0.0319851		1.79109e-06	0.00999553	1.5525e-05	2.41453e-07	-5.27784e-07	-0.00545833	9.36842e-06	1.48691e-07		bcin_chr_7:1,648,001..1,650,214(-)
689	Bcin07g04920	Vir	6	0.388058	-0.00387738	0.0889194	-0.0187157		-9.08679e-07	-0.00692319	1.29333e-05	1.76227e-07	-2.43413e-08	-0.00174501	9.87719e-06	9.63083e-08		bcin_chr_7:1,775,562..1,777,668(+)		Concanavalin A-like lectin/glucanase domain superfamily			Concanavalin A-like lectin/glucanase domain superfamily		integral component of membrane	hydrolase activity, hydrolyzing O-glycosyl compounds	carbohydrate metabolic process	3.2.1.6 (Endo-1,3(4)-beta-glucanase)
690	Bcin07g04950	Vir	17	0.315619	-0.0177901	0.0472229	0.100975		-4.36236e-07	-0.00435002	1.22412e-05	1.55636e-07	3.11973e-06	0.0375701	3.96471e-05	1.79433e-06		bcin_chr_7:1,782,474..1,784,804(-)		Questin oxidase-like	Questin oxidase-like					oxidoreductase activity		3.4.25.1 (Proteasome endopeptidase complex)
691	Bcin07g05000	Vir	13	0.261149	-0.012084	0.0695401	0.0492676		4.46003e-08	0.00222743	1.94615e-05	4.97511e-07	9.81342e-07	0.013059	4.91498e-05	2.77344e-06		bcin_chr_7:1,882,635..1,883,866(-)
692	Bcin07g05080	Vir	4	0.0107046	-0.0458983	5.81319e-07	0.113754		-2.53051e-06	-0.0200981	2.68e-05	7.59312e-07	3.90863e-06	0.053922	7.02632e-05	3.79768e-06		bcin_chr_7:1,902,670..1,903,881(+)
693	Bcin07g05090	Vir	3	0.0296432	-0.0261272	0.187849	0.0623202		-1.58482e-06	-0.0171096	2.64333e-05	6.68952e-07	2.26621e-06	0.0223724	2.67719e-05	1.02889e-06		bcin_chr_7:1,903,909..1,905,883(-)		Small GTPase;Small GTP-binding protein domain;P-loop containing nucleoside triphosphate hydrolase	Small GTPase		P-loop containing nucleoside triphosphate hydrolase	Small GTP-binding protein domain		GTP binding;GTPase activity		3.6.5.2 (Small monomeric GTPase)
694	Bcin07g05100	SpeVir	22	0.0046698	-0.0537073	0.0351586	0.100445		-2.983e-06	-0.0279171	3.61773e-05	1.31427e-06	2.8858e-06	0.0348726	4.2488e-05	1.99029e-06		bcin_chr_7:1,906,102..1,910,692(+)		Zinc finger, CCCH-type;Chromo/chromo shadow domain;Chromo-like domain superfamily;Chromo domain, conserved site;Chromo domain;Zinc finger, CCCH-type superfamily	Chromo domain	Chromo/chromo shadow domain;Zinc finger, CCCH-type	Chromo-like domain superfamily;Zinc finger, CCCH-type superfamily			metal ion binding
695	Bcin07g05260	Vir	18	0.519752	-0.00985396	0.069605	0.0130723		-6.15099e-07	-0.00443455	1.31778e-05	2.3157e-07	1.93109e-07	0.00242062	1.2386e-05	1.70625e-07		bcin_chr_7:1,955,791..1,957,653(-)	Bcyaf9	YEATS	YEATS				nucleus		regulation of transcription, DNA-templated
696	Bcin07g05310	Vir	17	0.33507	0.00117579	0.117778	0.00153921		2.00741e-07	0.00172849	1.67235e-05	3.85668e-07	6.25556e-09	0.00606603	2.56099e-05	1.09687e-06		bcin_chr_7:1,965,427..1,968,243(+)
697	Bcin07g05340	SpeVir	21	0.292768	0.00303021	0.133892	-0.0102432		-4.2592e-08	0.00153341	1.21429e-05	1.96042e-07	-3.95279e-07	-0.000669345	1.18647e-05	1.96237e-07		bcin_chr_7:1,977,489..1,981,521(+)							integral component of membrane
698	Bcin07g05370	Vir	57	0.232612	0.00787185	0.152373	-0.0163418		4.67065e-07	0.00141722	1.37667e-05	2.55914e-07	-9.80108e-07	-0.00834839	2.24377e-05	7.49494e-07		bcin_chr_7:1,988,984..1,989,887(-)
699	Bcin07g05380	Vir	45	0.449176	0.0122946	0.258288	-0.0323093		3.37304e-07	0.00318019	1.11978e-05	1.71562e-07	-6.00888e-07	-0.00538122	1.62269e-05	3.86283e-07		bcin_chr_7:1,990,511..1,991,707(-)
700	Bcin07g05400	Vir	11	0.0685539	-0.0459867	0.0654154	0.0944373		-1.2303e-06	-0.0115916	1.66273e-05	2.64392e-07	1.20084e-06	0.0189066	1.26986e-05	2.9099e-07		bcin_chr_7:1,994,202..1,996,888(-)		Six-hairpin glycosidase superfamily;Galactose-binding-like domain superfamily;Bacterial alpha-L-rhamnosidase N-terminal;Alpha-L-rhamnosidase, six-hairpin glycosidase domain	Bacterial alpha-L-rhamnosidase N-terminal;Alpha-L-rhamnosidase, six-hairpin glycosidase domain		Six-hairpin glycosidase superfamily;Galactose-binding-like domain superfamily			catalytic activity		3.2.1.31 (Beta-glucuronidase)
701	Bcin07g05430	Spe	65	0.145643	-0.00891668	0.0777397	0.0584813		1.08251e-06	0.00583037	2.76092e-05	8.28154e-07	6.41535e-07	0.0125612	1.78931e-05	5.35977e-07		bcin_chr_7:2,001,546..2,003,412(-)		Cytochrome P450;Cytochrome P450, E-class, group I;Cytochrome P450, conserved site;Cytochrome P450 superfamily	Cytochrome P450		Cytochrome P450 superfamily		integral component of membrane	heme binding;iron ion binding;monooxygenase activity;oxidoreductase activity, acting on paired donors, with incorporation or reduction of molecular oxygen	oxidation-reduction process;pathogenesis	1.14.-.- (Acting on paired donors, with incorporation or reduction of molecular oxygen. The oxygen incorporated need not be derived from O(2).)
702	Bcin07g05460	Vir	30	0.361922	0.00375964	0.370931	-0.00831139		-3.80112e-07	-0.00314945	1.711e-05	3.71289e-07	5.32952e-07	0.00294938	1.98316e-05	6.49518e-07		bcin_chr_7:2,008,797..2,010,513(-)
703	Bcin07g05530	Vir	15	0.0914691	-0.0127447	0.00694997	0.042806		-1.15837e-07	-0.00057955	1.112e-05	1.21105e-07	9.1781e-07	0.0115067	3.1614e-05	1.39863e-06		bcin_chr_7:2,036,913..2,039,244(+)		Glycoside hydrolase family 47;Seven-hairpin glycosidases	Glycoside hydrolase family 47		Seven-hairpin glycosidases		membrane	calcium ion binding;catalytic activity;mannosyl-oligosaccharide 1,2-alpha-mannosidase activity	protein glycosylation	3.2.1.- (Glycosidases, i.e. enzymes hydrolyzing O- and S-glycosyl compounds.)
704	Bcin07g05540	Vir	83	0.404584	-0.0142494	0.226111	0.0304399		3.28966e-07	0.00096206	1.10651e-05	1.35935e-07	1.27675e-06	0.0123522	1.71795e-05	5.22185e-07		bcin_chr_7:2,039,542..2,050,026(-)		Tc toxin complex TcA, C-terminal TcB-binding domain;Neuraminidase-like domain	Tc toxin complex TcA, C-terminal TcB-binding domain;Neuraminidase-like domain
705	Bcin07g05570	Vir	48	0.164032	0.020825	0.288175	-0.0137322		2.65952e-06	0.0142876	2.30875e-05	5.89567e-07	-2.5104e-06	-0.0161947	2.55811e-05	8.85456e-07		bcin_chr_7:2,056,776..2,059,354(-)		Protein kinase-like domain superfamily			Protein kinase-like domain superfamily					2.7.11.1 (Non-specific serine/threonine protein kinase)
706	Bcin07g05590	Spe	23	0.203343	0.00985708	0.256476	-0.0088247		5.0287e-07	0.00506979	5.13913e-05	2.24245e-06	-4.6393e-07	-0.00332596	1.45995e-05	3.41177e-07		bcin_chr_7:2,061,336..2,063,441(-)		Putative amidoligase enzyme	Putative amidoligase enzyme
707	Bcin07g05600	Spe	35	0.0550501	0.0130426	0.114376	-0.00842095		1.71123e-06	0.0119896	7.32171e-05	3.29626e-06	-9.24015e-07	-0.00714823	1.67398e-05	4.52387e-07		bcin_chr_7:2,065,715..2,066,684(-)
708	Bcin07g05610	Spe	6	0.162558	0.0018367	0.283287	-0.0367665		-9.18217e-07	-0.00707377	7.66833e-05	3.30792e-06	-1.97889e-07	-0.00406796	2.6386e-05	9.77028e-07		bcin_chr_7:2,066,872..2,067,911(-)	Bcmnp1	Ribosomal protein L7/L12;Ribosomal protein L7/L12, oligomerisation;Ribosomal protein L7/L12, C-terminal;Ribosomal protein L7/L12, C-terminal/adaptor protein ClpS-like;Ribosomal protein L7/L12, oligomerisation domain superfamily	Ribosomal protein L7/L12, C-terminal;Ribosomal protein L7/L12, oligomerisation		Ribosomal protein L7/L12, oligomerisation domain superfamily;Ribosomal protein L7/L12, C-terminal/adaptor protein ClpS-like		ribosome	structural constituent of ribosome	translation
709	Bcin07g05620	Spe	48	0.0165079	-0.00616754	0.0466851	0.0176324		1.3356e-07	0.000252804	0.000104025	5.15787e-06	-1.76314e-07	0.000851373	1.76382e-05	4.64847e-07		bcin_chr_7:2,067,988..2,083,240(+)	Bcmdn1	AAA+ ATPase domain;ATPase, dynein-related, AAA domain;Midasin;P-loop containing nucleoside triphosphate hydrolase;von Willebrand factor A-like domain superfamily;Midasin, AAA lid domain 7;Midasin AAA lid domain 5	ATPase, dynein-related, AAA domain;Midasin AAA lid domain 5;Midasin, AAA lid domain 7	AAA+ ATPase domain	P-loop containing nucleoside triphosphate hydrolase;von Willebrand factor A-like domain superfamily		chromosome;nucleus	ATP binding;ATPase activity	ribosomal large subunit assembly	3.6.4.2 (Transferred entry: 5.6.1.2)
710	Bcin07g05630	SpeVir	50	0.0821087	-0.0164796	0.165471	0.026451		-1.06907e-06	-0.00951695	4.2778e-05	1.73046e-06	7.51619e-07	0.0136062	3.02905e-05	1.50308e-06		bcin_chr_7:2,083,408..2,086,571(+)		Zn(2)-C6 fungal-type DNA-binding domain;Zn(2)-C6 fungal-type DNA-binding domain superfamily			Zn(2)-C6 fungal-type DNA-binding domain superfamily		host cell nucleus;nucleus	DNA-binding transcription factor activity, RNA polymerase II-specific;zinc ion binding	regulation of transcription, DNA-templated
711	Bcin07g05640	Spe	39	0.129728	0.00846895	0.100898	-0.0102683		5.7807e-07	0.00570717	4.7741e-05	2.52398e-06	-3.36033e-07	-0.00209621	1.81943e-05	5.49003e-07		bcin_chr_7:2,087,010..2,089,818(+)	Bcmfs1	Tetracycline resistance protein/drug resistance transporter;Major facilitator superfamily;MFS transporter superfamily	Major facilitator superfamily		MFS transporter superfamily		integral component of membrane	transmembrane transporter activity	transmembrane transport
712	Bcin07g05650	Vir	11	0.321277	-0.0182956	0.286796	0.027186		-1.48061e-06	-0.00816631	1.40273e-05	2.80927e-07	1.13121e-06	0.0099919	1.88804e-05	6.10321e-07		bcin_chr_7:2,089,845..2,091,979(+)							integral component of membrane
713	Bcin07g05720	Vir	16	0.341406	-0.000582672	0.0891988	-0.00887061		-3.83342e-07	-0.0011455	1.27063e-05	1.7832e-07	-4.06969e-07	-0.000274462	1.29474e-05	2.78797e-07		bcin_chr_7:2,110,650..2,117,103(+)	Bcubp12	Peptidase C19, ubiquitin carboxyl-terminal hydrolase;Peptidase C19, ubiquitin-specific peptidase, DUSP domain;Ubiquitin specific protease, conserved site;DUSP-like superfamily;Papain-like cysteine peptidase superfamily	Peptidase C19, ubiquitin carboxyl-terminal hydrolase;Peptidase C19, ubiquitin-specific peptidase, DUSP domain		DUSP-like superfamily;Papain-like cysteine peptidase superfamily			thiol-dependent ubiquitin-specific protease activity	protein deubiquitination;ubiquitin-dependent protein catabolic process	3.4.19.12 (Ubiquitinyl hydrolase 1)
714	Bcin07g05740	Vir	6	0.307248	-0.0220621	0.0160848	0.0399837		-8.49229e-07	-0.00513619	1.41167e-05	1.79145e-07	9.96073e-07	0.00874244	1.19649e-05	2.83291e-07		bcin_chr_7:2,125,401..2,126,342(-)
715	Bcin07g05790	SpeVir	22	0.250553	-0.0158461	0.0940524	0.0263793		-5.25848e-07	-0.00492382	1.37591e-05	4.54366e-07	1.87799e-07	0.0058433	1.24785e-05	2.35608e-07		bcin_chr_7:2,135,414..2,136,972(+)		Zinc finger, RING-type;Zinc finger, RING-CH-type	Zinc finger, RING-type	Zinc finger, RING-type;Zinc finger, RING-CH-type				zinc ion binding
716	Bcin07g05800	Vir	37	0.322562	0.00841173	0.288971	-0.0134065		4.83514e-07	0.00413839	1.10811e-05	1.68338e-07	-2.39462e-07	-0.00289792	1.15249e-05	2.06116e-07		bcin_chr_7:2,142,047..2,146,007(-)	Bcprr1	Protein kinase domain;Serine/threonine-protein kinase, active site;Protein kinase-like domain superfamily	Protein kinase domain	Protein kinase domain	Protein kinase-like domain superfamily			ATP binding;protein kinase activity	protein phosphorylation	2.7.11.1 (Non-specific serine/threonine protein kinase)
717	Bcin07g05960	Vir	17	0.386183	-0.0121309	0.00225014	0.0809665		1.83032e-06	0.0140858	2.15588e-05	5.64097e-07	8.04438e-09	0.00190135	1.12322e-05	1.24782e-07		bcin_chr_7:2,205,747..2,208,426(+)
718	Bcin07g06050	Spe	14	0.670895	-0.00435918	0.0773552	-0.0378165		2.78587e-07	0.0021613	1.25643e-05	1.72746e-07	-2.13062e-06	-0.0284453	2.70075e-05	1.15394e-06		bcin_chr_7:2,230,378..2,231,282(-)		Zinc finger C2H2-type;Zinc finger C2H2 superfamily	Zinc finger C2H2-type	Zinc finger C2H2-type	Zinc finger C2H2 superfamily
719	Bcin07g06060	Spe	1	0.531165	0.0111772	0.00443829	0.0700955		4.64321e-06	0.0672887	0.0001586	1.07103e-05	-1.06741e-06	-0.0120154	9.89474e-06	1.65048e-07		bcin_chr_7:2,232,338..2,234,105(-)		Short-chain dehydrogenase/reductase SDR;NAD(P)-binding domain superfamily	Short-chain dehydrogenase/reductase SDR		NAD(P)-binding domain superfamily
720	Bcin07g06070	Spe	1	0.531165	0.0111772	0.00443829	0.0700955		4.64321e-06	0.063164	0.0001637	1.03541e-05	-1.06741e-06	-0.00715359	6e-06	1.05114e-07		bcin_chr_7:2,234,285..2,236,141(-)		Acyl-CoA dehydrogenase/oxidase C-terminal;Acyl-CoA dehydrogenase/oxidase, N-terminal and middle domain superfamily;Acyl-CoA dehydrogenase/oxidase, N-terminal;Acyl-CoA dehydrogenase-like, C-terminal	Acyl-CoA dehydrogenase/oxidase C-terminal;Acyl-CoA dehydrogenase/oxidase, N-terminal		Acyl-CoA dehydrogenase-like, C-terminal;Acyl-CoA dehydrogenase/oxidase, N-terminal and middle domain superfamily			flavin adenine dinucleotide binding;oxidoreductase activity, acting on the CH-CH group of donors	oxidation-reduction process	1.7.3.1 (Nitroalkane oxidase)
721	Bcin07g06090	Vir	14	0.421751	-0.00658352	0.416497	0.0117798		-1.44543e-06	-0.00702722	1.30071e-05	2.32364e-07	1.72366e-06	0.0139186	0.000105	6.24621e-06		bcin_chr_7:2,241,411..2,243,435(-)	Bcspo7	Sporulation-specific protein Spo7	Sporulation-specific protein Spo7				integral component of membrane	protein phosphatase regulator activity
722	Bcin07g06140	Vir	6	0.290279	-0.0233069	0.224063	0.0698309		-1.26458e-06	-0.00840202	1.27333e-05	1.41701e-07	3.45461e-06	0.0381113	9.73333e-05	5.87089e-06		bcin_chr_7:2,256,186..2,258,234(+)	Bcmdj1	Heat shock protein DnaJ, cysteine-rich domain;DnaJ domain;Chaperone DnaJ, C-terminal;HSP40/DnaJ peptide-binding;Chaperone DnaJ;Heat shock protein DnaJ, cysteine-rich domain superfamily;Chaperone J-domain superfamily	DnaJ domain;Heat shock protein DnaJ, cysteine-rich domain;Chaperone DnaJ, C-terminal	DnaJ domain	Chaperone J-domain superfamily;HSP40/DnaJ peptide-binding;Heat shock protein DnaJ, cysteine-rich domain superfamily			ATP binding;heat shock protein binding;metal ion binding;unfolded protein binding	protein folding;response to heat	3.1.3.2 (Acid phosphatase)
723	Bcin07g06280	Vir	5	0.368044	0.0125162	0.354711	-0.0290872		-1.59535e-07	-0.000426924	1.248e-05	1.51617e-07	2.00817e-07	-0.00400497	1.43158e-05	4.23034e-07		bcin_chr_7:2,307,170..2,311,438(+)	Bcsmc2	RecF/RecN/SMC, N-terminal;SMCs flexible hinge;Smc2, ATP-binding cassette domain;P-loop containing nucleoside triphosphate hydrolase;SMCs flexible hinge superfamily	RecF/RecN/SMC, N-terminal;SMCs flexible hinge	SMCs flexible hinge	P-loop containing nucleoside triphosphate hydrolase;SMCs flexible hinge superfamily		chromosome;nucleus	ATP binding;protein binding	cell division;chromosome condensation;chromosome organization	1.3.1.74 (2-alkenal reductase (NAD(P)(+)))
724	Bcin07g06290	Vir	4	0.0416988	0.0195443	0.00517127	-0.0197302		7.10341e-07	0.00305051	1.2725e-05	2.2881e-07	7.20803e-07	0.0105427	1.96842e-05	6.27095e-07		bcin_chr_7:2,317,519..2,319,801(+)		Molybdenum cofactor sulfurase, C-terminal;MOSC, N-terminal beta barrel;Pyruvate kinase-like, insert domain superfamily	Molybdenum cofactor sulfurase, C-terminal;MOSC, N-terminal beta barrel		Pyruvate kinase-like, insert domain superfamily		integral component of membrane	catalytic activity;molybdenum ion binding;pyridoxal phosphate binding		2.8.1.9 (Molybdenum cofactor sulfurtransferase)
725	Bcin07g06450	Spe	4	0.385801	-0.0144971	0.563522	0.0103643		-1.69036e-06	-0.0109713	2.5975e-05	7.30248e-07	6.00069e-07	0.00480085	9.86842e-06	1.31145e-07		bcin_chr_7:2,376,742..2,380,168(-)		Sugar transporter, conserved site;Major facilitator superfamily;MFS transporter superfamily	Major facilitator superfamily		MFS transporter superfamily		integral component of membrane	transmembrane transporter activity	transmembrane transport
726	Bcin07g06470	Vir	23	0.27353	0.00860124	0.161008	-0.00414678		7.21805e-07	0.00344595	1.61913e-05	3.63303e-07	-3.67749e-08	-0.00112608	2.2746e-05	8.22808e-07		bcin_chr_7:2,386,226..2,388,718(-)		Zn(2)-C6 fungal-type DNA-binding domain;Transcription factor domain, fungi;Zn(2)-C6 fungal-type DNA-binding domain superfamily	Zn(2)-C6 fungal-type DNA-binding domain;Transcription factor domain, fungi	Zn(2)-C6 fungal-type DNA-binding domain;Transcription factor domain, fungi	Zn(2)-C6 fungal-type DNA-binding domain superfamily		host cell nucleus;nucleus	DNA binding;DNA-binding transcription factor activity, RNA polymerase II-specific;zinc ion binding	regulation of transcription, DNA-templated;transcription, DNA-templated
727	Bcin07g06540	Vir	23	0.185678	-0.022706	0.0482396	0.0664376		-8.7857e-07	-0.00755473	1.4787e-05	2.50294e-07	1.92797e-06	0.0283104	4.38764e-05	2.23261e-06		bcin_chr_7:2,407,743..2,410,965(+)		Beta-glucan synthesis-associated, Skn1;Concanavalin A-like lectin/glucanase domain superfamily	Beta-glucan synthesis-associated, Skn1		Concanavalin A-like lectin/glucanase domain superfamily		integral component of membrane	hydrolase activity, hydrolyzing O-glycosyl compounds	(1->6)-beta-D-glucan biosynthetic process;carbohydrate metabolic process
728	Bcin07g06600	Vir	5	0.214758	-0.00142983	0.0301401	0.0209701		1.55279e-07	0.000298457	1.212e-05	1.25267e-07	9.10136e-07	0.0199179	3.69474e-05	2.14123e-06		bcin_chr_7:2,430,280..2,433,450(-)		SUN family	SUN family							3.2.1.- (Glycosidases, i.e. enzymes hydrolyzing O- and S-glycosyl compounds.)
729	Bcin07g06800	Spe	24	0.206161	0.0222358	0.255446	-0.012618		2.99153e-06	0.024735	2.79125e-05	9.04648e-07	-1.8831e-06	-0.0166517	1.77325e-05	4.92995e-07		bcin_chr_7:2,520,435..2,523,065(-)		Zn(2)-C6 fungal-type DNA-binding domain		Zn(2)-C6 fungal-type DNA-binding domain			host cell nucleus;nucleus	DNA-binding transcription factor activity, RNA polymerase II-specific;zinc ion binding	regulation of transcription, DNA-templated
730	Bcin07g06820	Spe	12	0.145373	0.0376013	0.20772	-0.0384319		3.28728e-06	0.0285268	3.5875e-05	1.22775e-06	-1.80613e-06	-0.0164258	1.52368e-05	3.08868e-07		bcin_chr_7:2,525,269..2,526,852(+)
731	Bcin07g06830	Spe	72	0.124521	0.0335588	0.357079	-0.0256161		3.31064e-06	0.0268557	3.28292e-05	1.06803e-06	-1.97653e-06	-0.0172204	1.65468e-05	4.24012e-07		bcin_chr_7:2,527,028..2,530,887(+)
732	Bcin07g06930	SpeVir	10	0.17208	-0.00273521	0.165546	0.0231707		8.83108e-07	0.00751115	8.163e-05	4.96475e-06	-2.74943e-07	-0.00550804	2.31474e-05	7.51056e-07		bcin_chr_7:2,559,813..2,561,211(+)
733	Bcin07g06990	Vir	6	0.168217	-0.00765316	0.165183	0.0166346		5.46532e-07	0.0049775	1.985e-05	4.10229e-07	-9.97517e-07	-0.0115203	0.000157	1.09973e-05		bcin_chr_7:2,587,916..2,590,520(+)		Isochorismatase-like;Isochorismatase-like superfamily	Isochorismatase-like		Isochorismatase-like superfamily			catalytic activity		3.5.1.19 (Nicotinamidase)
734	Bcin07g07010	Vir	10	0.300826	-0.00233837	0.139598	0.020028		4.0934e-07	0.000596821	1.376e-05	2.46677e-07	3.98465e-08	-0.00196526	5.21684e-05	2.53559e-06		bcin_chr_7:2,592,990..2,594,012(-)		Zinc finger, RING-type	Zinc finger, RING-type
735	Bcin07g07050	Vir	10	0.260266	0.0225492	0.214872	-0.0588787		9.73238e-07	0.00874267	1.565e-05	2.68141e-07	-1.67984e-06	-0.0188228	2.74e-05	1.10178e-06		bcin_chr_7:2,599,768..2,601,182(-)
736	Bcin08g00010	Vir	8	0.304718	-0.00589906	0.149004	0.0259917		9.54236e-07	0.00377356	1.2175e-05	1.25384e-07	-9.37929e-07	-0.00714562	1.16579e-05	1.33641e-07		bcin_chr_8:1,709..4,003(-)		Cytochrome P450;Cytochrome P450, E-class, group I;Cytochrome P450, conserved site;Cytochrome P450 superfamily	Cytochrome P450		Cytochrome P450 superfamily		integral component of membrane	heme binding;iron ion binding;monooxygenase activity;oxidoreductase activity, acting on paired donors, with incorporation or reduction of molecular oxygen	oxidation-reduction process;pathogenesis	1.14.-.- (Acting on paired donors, with incorporation or reduction of molecular oxygen. The oxygen incorporated need not be derived from O(2).)
737	Bcin08g00430	Vir	13	0.0317403	-0.0404359	0.0941102	0.0574335		-2.64128e-06	-0.0279905	2.76385e-05	1.00126e-06	1.42376e-06	0.0172152	2.19757e-05	7.84239e-07		bcin_chr_8:205,003..206,204(+)
738	Bcin08g00450	Spe	18	0.00833921	-0.0494448	0.0100067	0.0886711		-2.25214e-06	-0.0304238	2.57889e-05	9.58742e-07	1.6282e-06	0.0195161	1.7345e-05	4.12234e-07		bcin_chr_8:219,583..222,287(-)
739	Bcin08g00520	Vir	4	0.0108686	-0.0463162	0.00016696	0.0958807		-1.90198e-06	-0.0186656	2.04e-05	5.72912e-07	1.39533e-06	0.0198745	1.69474e-05	4.20667e-07		bcin_chr_8:241,727..244,869(+)		S-adenosyl-L-methionine-dependent methyltransferase;Methyltransferase domain 25	Methyltransferase domain 25		S-adenosyl-L-methionine-dependent methyltransferase
740	Bcin08g00560	Spe	3	0.025712	-0.0428129	1.6106e-05	0.112987		-2.79657e-07	-0.00561298	1.21e-05	1.21694e-07	5.97162e-07	0.0147142	1.09825e-05	1.4989e-07		bcin_chr_8:262,374..264,671(+)		Cytochrome P450;Cytochrome P450, E-class, group I;Cytochrome P450, conserved site;Cytochrome P450 superfamily	Cytochrome P450		Cytochrome P450 superfamily		integral component of membrane	heme binding;iron ion binding;monooxygenase activity;oxidoreductase activity, acting on paired donors, with incorporation or reduction of molecular oxygen	oxidation-reduction process;pathogenesis	1.14.-.- (Acting on paired donors, with incorporation or reduction of molecular oxygen. The oxygen incorporated need not be derived from O(2).)
741	Bcin08g00850	Vir	25	0.384531	-0.00673748	0.225133	0.00205846		-4.34369e-07	-0.00382817	1.3224e-05	2.21537e-07	-7.67521e-08	0.00111154	1.61937e-05	3.33125e-07		bcin_chr_8:351,303..354,327(-)	BcPtpB	PTP type protein phosphatase;Protein-tyrosine phosphatase, catalytic;Protein-tyrosine phosphatase, active site;Protein-tyrosine phosphatase-like	PTP type protein phosphatase	PTP type protein phosphatase;Protein-tyrosine phosphatase, catalytic	Protein-tyrosine phosphatase-like			phosphatase activity;protein tyrosine phosphatase activity	dephosphorylation;protein dephosphorylation	3.1.3.48 (Protein-tyrosine-phosphatase)
742	Bcin08g00860	Vir	11	0.138249	0.0283631	0.142375	-0.0557602		2.36387e-06	0.0206889	4.97273e-05	1.92437e-06	-2.73345e-06	-0.0317063	7.22679e-05	3.8552e-06		bcin_chr_8:355,772..358,708(-)	Bcubp1	Peptidase C19, ubiquitin carboxyl-terminal hydrolase;Ubiquitin specific protease, conserved site;Papain-like cysteine peptidase superfamily	Peptidase C19, ubiquitin carboxyl-terminal hydrolase		Papain-like cysteine peptidase superfamily		integral component of membrane		protein deubiquitination;ubiquitin-dependent protein catabolic process	3.4.19.12 (Ubiquitinyl hydrolase 1)
743	Bcin08g00930	Vir	17	0.241863	-0.00600078	0.120094	0.0272086		-5.37915e-09	9.82753e-05	1.37e-05	1.80682e-07	7.87349e-07	0.0114324	2.66192e-05	9.84199e-07		bcin_chr_8:382,176..383,438(-)		Short-chain dehydrogenase/reductase SDR;Short-chain dehydrogenase/reductase, conserved site;NAD(P)-binding domain superfamily	Short-chain dehydrogenase/reductase SDR		NAD(P)-binding domain superfamily			oxidoreductase activity		1.1.1.100 (3-oxoacyl-[acyl-carrier-protein] reductase)
744	Bcin08g00950	Vir	12	0.10342	-0.0177287	0.0172121	0.0502208		-3.79015e-07	-0.00644558	1.38917e-05	6.74756e-07	1.59374e-06	0.022205	3.69912e-05	1.75005e-06		bcin_chr_8:389,035..390,597(+)		GDSL lipase/esterase	GDSL lipase/esterase					hydrolase activity, acting on ester bonds		3.1.1.- (Carboxylic ester hydrolases.)
745	Bcin08g00960	Vir	11	0.61048	-0.00182156	0.420128	0.00457762		-1.65982e-08	-0.00016633	1.23818e-05	1.56836e-07	-1.74096e-07	0.00193973	2.06029e-05	6.29667e-07		bcin_chr_8:391,174..392,827(-)
746	Bcin08g01100	Vir	14	0.0194872	-0.0375411	0.010895	0.087763		-1.19576e-06	-0.0118907	1.48429e-05	2.42346e-07	1.37202e-06	0.0204317	2.04211e-05	7.5247e-07		bcin_chr_8:442,005..443,605(-)
747	Bcin08g01160	Vir	28	0.223179	-0.00776277	0.107953	0.0187733		1.01702e-07	-0.000346092	1.15429e-05	1.59483e-07	-2.06233e-07	-0.00119877	1.40113e-05	2.80901e-07		bcin_chr_8:464,422..470,690(-)
748	Bcin08g01170	Vir	14	0.39338	-0.00173353	0.0702931	0.00824419		6.27345e-08	0.00171405	1.18357e-05	1.0965e-07	2.976e-08	0.000392409	1.36617e-05	2.41365e-07		bcin_chr_8:473,126..475,060(-)
749	Bcin08g01190	Spe	23	0.185106	-0.0240495	0.000267425	0.0898699		1.87402e-07	0.00184272	1.24261e-05	1.10132e-07	9.88972e-07	0.0100077	1.28879e-05	1.98161e-07		bcin_chr_8:480,881..482,236(-)
750	Bcin08g01240	Spe	16	0.0334606	-0.0395874	0.0285518	0.0682796		-1.69477e-06	-0.0226543	3.35625e-05	1.32597e-06	4.63302e-07	0.00597632	1.26974e-05	2.11001e-07		bcin_chr_8:491,893..493,698(-)
751	Bcin08g01250	Spe	17	0.00602908	-0.0435114	0.00596958	0.0598917		-3.44187e-06	-0.038523	5.54765e-05	2.61156e-06	1.86588e-06	0.0185625	1.66502e-05	4.15031e-07		bcin_chr_8:494,587..496,092(+)							integral component of membrane
752	Bcin08g01400	Vir	38	0.307065	-0.00959893	0.0620921	0.0444823		-3.64891e-07	-0.00139157	1.225e-05	1.30841e-07	1.55836e-06	0.0163429	1.75762e-05	5.23918e-07		bcin_chr_8:549,308..552,424(+)		P-loop containing nucleoside triphosphate hydrolase			P-loop containing nucleoside triphosphate hydrolase
753	Bcin08g02470	Vir	17	0.059089	-0.0180475	0.0237181	0.0656867		-3.66192e-07	-0.004949	1.49765e-05	2.45031e-07	1.45268e-06	0.0280501	3.16594e-05	1.71258e-06		bcin_chr_8:950,733..952,872(-)		Carboxylesterase, type B;Alpha/Beta hydrolase fold	Carboxylesterase, type B		Alpha/Beta hydrolase fold					3.1.1.- (Carboxylic ester hydrolases.)
754	Bcin08g02480	Vir	12	0.0736131	-0.0279567	0.125962	0.0436067		-5.90744e-07	-0.00555803	1.34333e-05	1.71551e-07	-6.58707e-07	-0.00478968	1.16316e-05	2.03108e-07		bcin_chr_8:953,079..955,431(+)		Cholinesterase;Carboxylesterase, type B;Carboxylesterase type B, conserved site;Carboxylesterase type B, active site;Alpha/Beta hydrolase fold	Carboxylesterase, type B		Alpha/Beta hydrolase fold		integral component of membrane	cholinesterase activity		3.1.1.- (Carboxylic ester hydrolases.)
755	Bcin08g02570	Vir	12	0.148901	-0.0198991	0.0968334	0.0528984		-1.9757e-07	-0.00196054	1.12667e-05	1.28773e-07	7.72028e-07	0.00919128	1.32456e-05	2.84352e-07		bcin_chr_8:976,953..978,390(+)		Polyketide synthase, ketoreductase domain;NAD(P)-binding domain superfamily	Polyketide synthase, ketoreductase domain		NAD(P)-binding domain superfamily					2.3.1.39 ([Acyl-carrier-protein] S-malonyltransferase)
756	Bcin08g02610	Vir	8	0.152887	-0.00683125	0.0229636	0.0374305		2.08255e-07	0.000602299	1.66875e-05	3.62e-07	6.32558e-07	0.00833822	0.000561829	5.22274e-05		bcin_chr_8:997,023..1,000,250(-)		Zinc finger, CCHC-type;AAA+ ATPase domain;DNA helicase Pif1-like;P-loop containing nucleoside triphosphate hydrolase;Zinc finger, CCHC-type superfamily	Zinc finger, CCHC-type;DNA helicase Pif1-like	Zinc finger, CCHC-type;AAA+ ATPase domain	P-loop containing nucleoside triphosphate hydrolase;Zinc finger, CCHC-type superfamily		mitochondrion;nucleus	5'-3' DNA helicase activity;ATP binding;DNA binding;DNA helicase activity;nucleic acid binding;zinc ion binding	DNA recombination;DNA repair;mitochondrial genome maintenance;telomere maintenance	3.6.4.12 (DNA helicase)
757	Bcin08g02630	Vir	26	0.184782	-0.00614599	0.10838	0.0274154		8.88412e-08	0.00101279	2.29654e-05	6.29079e-07	5.49578e-07	0.0106024	7.93927e-05	4.92705e-06		bcin_chr_8:1,005,447..1,008,060(+)
758	Bcin08g02640	Vir	10	0.279071	0.00265547	0.142271	0.00486101		-1.282e-07	-0.00252521	1.127e-05	1.50685e-07	7.29949e-07	0.0154766	6.10105e-05	3.4083e-06		bcin_chr_8:1,008,084..1,009,054(-)
759	Bcin08g02980	Spe	10	0.0270045	0.0326498	0.144082	-0.0280665		2.79319e-06	0.0222105	4.918e-05	1.98272e-06	-1.3793e-07	-0.00147026	1.18842e-05	1.44068e-07		bcin_chr_8:1,127,510..1,136,475(-)	Bcbph1	BEACH domain;WD40 repeat;Concanavalin A-like lectin/glucanase domain superfamily;WD40 repeat, conserved site;PH-BEACH domain;WD40-repeat-containing domain superfamily;BEACH domain superfamily	BEACH domain;PH-BEACH domain	WD40 repeat;BEACH domain	Concanavalin A-like lectin/glucanase domain superfamily;WD40-repeat-containing domain superfamily;BEACH domain superfamily			protein binding
760	Bcin08g03000	Vir	15	0.425229	0.0103966	0.14146	0.00568939		1.98763e-06	0.0115531	1.48933e-05	2.39647e-07	-1.7114e-06	-0.0178381	2.4414e-05	8.91576e-07		bcin_chr_8:1,140,855..1,144,941(+)
761	Bcin08g03050	Vir	10	0.0859077	0.00993232	0.188709	-0.0116169		6.12435e-07	0.00247815	1.325e-05	1.82887e-07	4.68869e-08	0.0025996	1.51263e-05	4.23789e-07		bcin_chr_8:1,164,208..1,167,794(+)		Protein kinase domain;Serine/threonine-protein kinase, active site;Protein kinase-like domain superfamily;Protein kinase, ATP binding site	Protein kinase domain	Protein kinase domain	Protein kinase-like domain superfamily			ATP binding;protein kinase activity	protein phosphorylation	2.7.11.1 (Non-specific serine/threonine protein kinase)
762	Bcin08g03110	Vir	13	0.00666655	-0.0493838	0.06442	0.0856452		-1.76494e-06	-0.0142176	1.82077e-05	3.43574e-07	1.27666e-06	0.0152242	1.27854e-05	3.05434e-07		bcin_chr_8:1,186,578..1,190,129(-)	CND17									3.2.1.3 (Glucan 1,4-alpha-glucosidase)
763	Bcin08g03130	Vir	26	0.328982	-0.00933589	0.0433345	0.0390445		-1.53451e-07	-0.00239315	1.14192e-05	1.35784e-07	6.89385e-07	0.00495658	1.00891e-05	1.37492e-07		bcin_chr_8:1,213,661..1,217,689(+)		Tetrapeptide transporter, OPT1/isp4;Oligopeptide transporter, OPT superfamily	Oligopeptide transporter, OPT superfamily			Tetrapeptide transporter, OPT1/isp4;Oligopeptide transporter, OPT superfamily	integral component of membrane		protein transport;transmembrane transport	2.3.1.179 (Beta-ketoacyl-[acyl-carrier-protein] synthase II)
764	Bcin08g03230	Vir	13	0.266314	-0.00117232	0.105828	-0.00826571		6.27585e-07	0.00232776	1.71e-05	3.5189e-07	-1.54084e-06	-0.0148861	5.5668e-05	2.74602e-06		bcin_chr_8:1,241,480..1,243,355(+)		NAD(P)-binding domain superfamily			NAD(P)-binding domain superfamily					1.-.-.- (Oxidoreductases.)
765	Bcin08g03470	Vir	22	0.18459	0.03348	0.298203	-0.0275868		1.68744e-06	0.0101368	1.29864e-05	2.03775e-07	2.47331e-07	-0.00518133	2.77129e-05	1.22287e-06		bcin_chr_8:1,330,366..1,333,691(-)	Bcemc1	Pyrrolo-quinoline quinone repeat;Quinoprotein alcohol dehydrogenase-like superfamily;ER membrane protein complex subunit 1, C-terminal;ER membrane protein complex subunit 1	ER membrane protein complex subunit 1, C-terminal;Pyrrolo-quinoline quinone repeat		Quinoprotein alcohol dehydrogenase-like superfamily		ER membrane protein complex	protein binding		2.7.7.6 (DNA-directed RNA polymerase)
766	Bcin08g03490	Vir	7	0.254655	-0.0135053	0.303115	0.0329422		-1.42461e-06	-0.0113997	1.13571e-05	1.76078e-07	2.14593e-06	0.0235128	2.75789e-05	1.62231e-06		bcin_chr_8:1,343,833..1,346,338(+)	Bcldb19	Immunoglobulin E-set;LDB19, N-terminal	LDB19, N-terminal		Immunoglobulin E-set
767	Bcin08g03520	Spe	9	0.22949	-0.0198815	0.261379	0.0457521		-1.24392e-06	-0.0077161	2.77667e-05	1.08252e-06	1.60929e-06	0.0191103	3.01053e-05	1.3725e-06		bcin_chr_8:1,353,410..1,355,723(-)	Bcpho8	Alkaline phosphatase;Alkaline-phosphatase-like, core domain superfamily;Alkaline phosphatase, active site	Alkaline phosphatase	Alkaline phosphatase	Alkaline-phosphatase-like, core domain superfamily		integral component of membrane	alkaline phosphatase activity;catalytic activity;phosphatase activity		3.1.3.1 (Alkaline phosphatase)
768	Bcin08g03540	Vir	18	0.147683	-0.0278581	0.216451	0.0518512		-1.30991e-06	-0.0113419	1.40667e-05	3.13776e-07	8.48575e-07	0.0159405	2.01404e-05	7.26338e-07		bcin_chr_8:1,357,284..1,367,701(+)	Bcprp8	JAB1/MPN/MOV34 metalloenzyme domain;Homing endonuclease PI-Sce;Ribonuclease H-like superfamily;PRO8NT domain;PROCN domain;PROCT domain;Pre-mRNA-processing-splicing factor 8, U6-snRNA-binding;Pre-mRNA-processing-splicing factor 8, U5-snRNA-binding;RNA recognition motif, spliceosomal PrP8;PRP8 domain IV core;Homing endonuclease;Pre-mRNA-processing-splicing factor 8;Hint domain superfamily	Homing endonuclease PI-Sce;PRO8NT domain;PROCN domain;PROCT domain;Pre-mRNA-processing-splicing factor 8, U6-snRNA-binding;Pre-mRNA-processing-splicing factor 8, U5-snRNA-binding;RNA recognition motif, spliceosomal PrP8;PRP8 domain IV core	JAB1/MPN/MOV34 metalloenzyme domain	Hint domain superfamily;Ribonuclease H-like superfamily;Homing endonuclease		spliceosomal complex	DNA binding;RNA binding;U5 snRNA binding;U6 snRNA binding;endonuclease activity;isopeptidase activity;metallopeptidase activity;protein binding	mRNA splicing, via spliceosome;protein splicing
769	Bcin08g03580	Vir	11	0.555568	-0.00467074	0.175154	0.0317181		2.31347e-07	0.00180607	1.89273e-05	4.35298e-07	6.28499e-07	0.00702219	2.09761e-05	7.15553e-07		bcin_chr_8:1,381,585..1,382,523(-)		Tetracycline resistance protein/drug resistance transporter;MFS transporter superfamily			MFS transporter superfamily		integral component of membrane			3.2.1.55 (Non-reducing end alpha-L-arabinofuranosidase)
770	Bcin08g03590	SpeVir	27	0.597355	-0.00865915	0.147809	0.0574346		6.31408e-07	0.00154274	2.00111e-05	5.45578e-07	2.14631e-06	0.0166893	1.68616e-05	4.14207e-07		bcin_chr_8:1,384,743..1,386,142(+)		Cytochrome P450;Cytochrome P450, E-class, group IV;Cytochrome P450 superfamily	Cytochrome P450		Cytochrome P450 superfamily			heme binding;iron ion binding;monooxygenase activity;oxidoreductase activity, acting on paired donors, with incorporation or reduction of molecular oxygen	oxidation-reduction process;pathogenesis	1.-.-.- (Oxidoreductases.)
771	Bcin08g03880	Vir	26	0.218612	-0.0216537	0.000858174	0.0821856		-6.15602e-07	-0.00207515	9.56154e-06	7.13907e-08	3.77311e-06	0.0345144	3.56883e-05	1.52621e-06		bcin_chr_8:1,491,634..1,494,172(+)	Bcaba3							lyase activity	pathogenesis
772	Bcin08g04290	Spe	2	0.289933	-0.0181512	0.00911369	0.0618255		1.30931e-06	0.00786865	1.385e-05	2.07534e-07	-5.07429e-07	-0.000348112	1.17895e-05	8.60986e-08		bcin_chr_8:1,641,912..1,645,892(-)		Transcription factor domain, fungi;Zinc finger C2H2-type;Zinc finger C2H2 superfamily	Transcription factor domain, fungi	Zinc finger C2H2-type	Zinc finger C2H2 superfamily		nucleus	DNA binding;zinc ion binding	transcription, DNA-templated
773	Bcin08g04810	Spe	3	0.11136	-0.0328859	0.56922	0.0187135		-3.27492e-06	-0.0192474	2.64667e-05	7.00764e-07	1.14858e-06	0.00883847	1.48421e-05	1.75112e-07		bcin_chr_8:1,836,552..1,840,336(+)	Bccp6	Peptidase S10, serine carboxypeptidase;Serine carboxypeptidase, serine active site;Alpha/Beta hydrolase fold;Serine carboxypeptidases, histidine active site	Peptidase S10, serine carboxypeptidase		Alpha/Beta hydrolase fold			serine-type carboxypeptidase activity	proteolysis	3.4.16.- (Serine-type carboxypeptidases.)
774	Bcin08g05160	SpeVir	13	0.0121402	-0.0281015	0.00852656	0.0450842		-1.1066e-06	-0.0123135	2.61692e-05	8.42935e-07	7.01544e-07	0.00837342	1.2413e-05	2.37384e-07		bcin_chr_8:1,949,228..1,953,805(-)		Importin-beta, N-terminal domain;Exportin-2, central domain;Armadillo-type fold	Importin-beta, N-terminal domain;Exportin-2, central domain	Importin-beta, N-terminal domain	Armadillo-type fold			Ran GTPase binding	intracellular protein transport
775	Bcin08g05170	Spe	13	0.141229	-0.0130357	0.0914034	-0.00098037		-1.3512e-06	-0.0101348	4.34692e-05	1.62647e-06	1.78039e-07	0.00175402	1.14575e-05	1.28598e-07		bcin_chr_8:1,956,307..1,958,183(+)										3.6.4.12 (DNA helicase)
776	Bcin08g05270	Spe	28	0.075616	0.00156242	0.111799	0.00791932		6.91178e-07	0.00684702	3.38786e-05	1.14807e-06	-4.04636e-07	-0.00155719	1.6812e-05	3.71182e-07		bcin_chr_8:1,986,084..1,988,727(+)	Bczrt2	Zinc/iron permease;Zinc/iron permease, fungal/plant	Zinc/iron permease			Zinc/iron permease, fungal/plant	integral component of membrane;membrane	metal ion transmembrane transporter activity;zinc ion transmembrane transporter activity	metal ion transport;transmembrane transport;zinc ion transmembrane transport	1.3.1.74 (2-alkenal reductase (NAD(P)(+)))
777	Bcin08g05350	Vir	11	0.112206	-0.0338432	0.102464	0.0686813		-2.46242e-06	-0.0166662	1.55273e-05	3.17452e-07	3.03584e-06	0.0330564	0.000112316	7.44487e-06		bcin_chr_8:2,019,677..2,020,784(+)		DeoC/FbaB/LacD aldolase;Deoxyribose-phosphate aldolase;Deoxyribose-phosphate aldolase type I	DeoC/FbaB/LacD aldolase	DeoC/FbaB/LacD aldolase		Deoxyribose-phosphate aldolase	cytoplasm	catalytic activity;deoxyribose-phosphate aldolase activity;lyase activity	deoxyribonucleotide catabolic process;deoxyribose phosphate catabolic process	4.1.2.4 (Deoxyribose-phosphate aldolase)
778	Bcin08g05360	Spe	31	0.0473339	-0.0328643	0.670535	0.0102064		-2.71809e-06	-0.0169672	2.40032e-05	7.41154e-07	1.92412e-06	0.0132928	1.29508e-05	2.85765e-07		bcin_chr_8:2,020,796..2,022,562(-)		Zn(2)-C6 fungal-type DNA-binding domain;Fungal transcription factor;Zn(2)-C6 fungal-type DNA-binding domain superfamily	Zn(2)-C6 fungal-type DNA-binding domain;Fungal transcription factor	Zn(2)-C6 fungal-type DNA-binding domain	Zn(2)-C6 fungal-type DNA-binding domain superfamily		host cell nucleus;nucleus	DNA-binding transcription factor activity, RNA polymerase II-specific;zinc ion binding	regulation of transcription, DNA-templated
779	Bcin08g05370	SpeVir	31	0.0824052	-0.0328708	0.484557	0.019505		-2.75853e-06	-0.0169255	1.74613e-05	3.86273e-07	3.18824e-06	0.0245508	2.51952e-05	9.3177e-07		bcin_chr_8:2,023,170..2,024,766(-)										2.3.2.27 (RING-type E3 ubiquitin transferase)
780	Bcin08g05380	Vir	8	0.0264085	-0.0421753	0.00155139	0.085373		-2.20237e-06	-0.0193677	1.835e-05	4.73872e-07	1.75536e-06	0.0198054	3.57368e-05	1.71218e-06		bcin_chr_8:2,025,950..2,027,117(+)	Bctad2	Cytidine and deoxycytidylate deaminase domain;Cytidine deaminase-like	Cytidine and deoxycytidylate deaminase domain		Cytidine deaminase-like			catalytic activity		3.5.4.33 (tRNA(adenine(34)) deaminase)
781	Bcin08g05400	Spe	9	0.0283322	-0.0284942	0.00118032	0.0677341		-1.22677e-06	-0.0134692	2.99444e-05	1.03445e-06	8.29538e-07	0.00708506	1.79415e-05	5.45546e-07		bcin_chr_8:2,028,222..2,029,737(+)		Chromosome segregation in meiosis protein 3;TIPIN/Csm3/Swi3	Chromosome segregation in meiosis protein 3				nucleus		DNA replication checkpoint;cell cycle;cellular response to DNA damage stimulus;replication fork protection
782	Bcin08g05420	Spe	5	0.196665	-0.0288839	0.161129	0.0804587		-8.80576e-08	-0.000517489	1e-05	1.04044e-07	8.37412e-07	0.0106275	1.21474e-05	2.50946e-07		bcin_chr_8:2,034,644..2,036,725(-)
783	Bcin08g05480	Spe	11	0.391205	0.0163247	0.128709	-0.038696		5.32363e-07	0.00305055	1.13909e-05	1.27505e-07	-3.41608e-07	-0.0028159	1.00957e-05	8.47892e-08		bcin_chr_8:2,067,794..2,068,669(+)		Glycoside hydrolase family 16;Concanavalin A-like lectin/glucanase domain superfamily	Glycoside hydrolase family 16		Concanavalin A-like lectin/glucanase domain superfamily			hydrolase activity, hydrolyzing O-glycosyl compounds	carbohydrate metabolic process
784	Bcin08g05490	Vir	21	0.434397	0.00746408	0.258087	0.0214489		1.27748e-06	0.00657686	1.0419e-05	1.42809e-07	5.96993e-07	0.00638426	1.08672e-05	1.62199e-07		bcin_chr_8:2,071,704..2,073,390(-)
785	Bcin08g05510	SpeVir	29	0.477006	0.00772555	0.201326	0.0147981		1.53426e-06	0.00710147	1.25241e-05	1.93867e-07	-8.08511e-07	-0.00456092	9.91289e-06	1.02218e-07		bcin_chr_8:2,079,015..2,083,113(+)	Bcpol3	DNA-directed DNA polymerase, family B, exonuclease domain;DNA-directed DNA polymerase, family B, multifunctional domain;DNA-directed DNA polymerase, family B;Ribonuclease H-like superfamily;DNA-directed DNA polymerase, family B, conserved site;C4-type zinc-finger of DNA polymerase delta;DNA/RNA polymerase superfamily	DNA-directed DNA polymerase, family B, multifunctional domain;DNA-directed DNA polymerase, family B, exonuclease domain;C4-type zinc-finger of DNA polymerase delta	DNA-directed DNA polymerase, family B	Ribonuclease H-like superfamily;DNA/RNA polymerase superfamily		nucleus	4 iron, 4 sulfur cluster binding;DNA binding;DNA-directed DNA polymerase activity;metal ion binding;nucleic acid binding;nucleotide binding	DNA replication	2.7.7.7 (DNA-directed DNA polymerase)
786	Bcin08g05580	Spe	9	0.00851223	-0.0482921	0.00337656	0.0919256		-2.78861e-06	-0.0247146	2.8e-05	9.5379e-07	1.67734e-06	0.0160079	2.06316e-05	4.66299e-07		bcin_chr_8:2,109,050..2,111,120(+)		NTF2-like domain superfamily			NTF2-like domain superfamily
787	Bcin08g05640	Spe	10	0.173131	-0.0277994	0.0471538	0.0219348		-2.32218e-06	-0.0221861	5.123e-05	2.23348e-06	3.69946e-07	0.00544401	1.42526e-05	2.25316e-07		bcin_chr_8:2,131,790..2,133,350(+)		SET domain	SET domain					protein binding		2.1.1.43 (Transferred entry: 2.1.1.354)
788	Bcin08g05740	SpeVir	6	0.0220178	-0.0460858	0.00337446	0.0736168		-2.68188e-06	-0.0257891	3.44667e-05	1.14215e-06	1.69696e-06	0.019624	1.7807e-05	4.48168e-07		bcin_chr_8:2,151,349..2,151,965(+)
789	Bcin08g05820	Spe	15	0.0330867	-0.0105164	0.044604	0.03278		3.68423e-07	0.00153443	2.85067e-05	9.46726e-07	-5.4412e-07	-0.00249236	2.27509e-05	7.6404e-07		bcin_chr_8:2,172,393..2,173,175(+)
790	Bcin08g05830	Spe	8	0.0460423	-0.0189732	0.0469598	0.0547736		-2.28837e-07	-0.00125045	2.615e-05	8.16601e-07	6.58177e-07	0.016615	2.05e-05	6.67853e-07		bcin_chr_8:2,174,128..2,177,490(-)	Bcmkt1	XPG/Rad2 endonuclease;Temperature dependent protein affecting M2 dsRNA replication, C-terminal;Temperature dependent protein affecting M2 dsRNA replication, N-terminal;PIN-like domain superfamily;MKT1, H3TH domain	Temperature dependent protein affecting M2 dsRNA replication, C-terminal;Temperature dependent protein affecting M2 dsRNA replication, N-terminal		PIN-like domain superfamily			nuclease activity
791	Bcin08g05840	Spe	14	0.04851	0.0270386	0.0567129	-0.0511001		1.52294e-06	0.0104413	3.15643e-05	1.02409e-06	-1.6147e-06	-0.0103047	1.16917e-05	2.36419e-07		bcin_chr_8:2,177,616..2,179,318(+)		Oxoglutarate/iron-dependent dioxygenase;Non-haem dioxygenase N-terminal domain	Oxoglutarate/iron-dependent dioxygenase;Non-haem dioxygenase N-terminal domain					metal ion binding;oxidoreductase activity	oxidation-reduction process	1.14.11.6 (Thymine dioxygenase)
792	Bcin08g05850	Spe	6	0.0339374	0.0107353	0.0930306	-0.0221059		4.69538e-07	0.00638148	4.22e-05	1.47702e-06	-3.81234e-07	-0.00173018	2.45789e-05	7.5118e-07		bcin_chr_8:2,179,341..2,181,042(-)	Bcpus4	Pseudouridine synthase II, N-terminal;tRNA pseudouridine synthase II, TruB;Pseudouridine synthase, catalytic domain superfamily	Pseudouridine synthase II, N-terminal		Pseudouridine synthase, catalytic domain superfamily			RNA binding;pseudouridine synthase activity	RNA modification;RNA processing;pseudouridine synthesis	5.4.99.25 (tRNA pseudouridine(55) synthase)
793	Bcin08g05860	Spe	3	0.0758455	-0.0327392	0.000809056	0.0873286		-1.06171e-06	-0.0056413	1.39333e-05	1.26688e-07	1.35742e-06	0.0146837	1.4e-05	2.62198e-07		bcin_chr_8:2,181,428..2,183,392(+)
794	Bcin08g05870	Spe	57	0.0562754	-0.00527389	0.107234	-0.0101144		-6.63994e-07	-0.00336757	3.44982e-05	1.12784e-06	-6.315e-07	-0.00446629	1.33259e-05	2.82113e-07		bcin_chr_8:2,184,735..2,187,474(+)		Six-hairpin glycosidase superfamily;Alpha-L-fucosidase;Glycosyl hydrolase family 95, N-terminal domain	Glycosyl hydrolase family 95, N-terminal domain		Six-hairpin glycosidase superfamily			alpha-L-fucosidase activity;catalytic activity		3.2.1.51 (Alpha-L-fucosidase)
795	Bcin08g05940	Spe	22	0.108517	-0.0329595	0.100396	0.0560428		-1.50685e-06	-0.0195097	5.24864e-05	2.69879e-06	4.07703e-07	0.00608696	1.19522e-05	1.87006e-07		bcin_chr_8:2,223,198..2,225,103(-)
796	Bcin08g05950	Spe	13	0.0975476	-0.0101128	0.00722166	0.0477791		3.23549e-07	0.00452335	2.66154e-05	9.43935e-07	3.43344e-07	0.00509789	1.49231e-05	2.89688e-07		bcin_chr_8:2,226,016..2,226,871(-)		Uncharacterized protein AN11006-like
797	Bcin08g05990	Spe	27	0.322427	-0.0139586	0.0923045	0.026737		-5.28537e-07	-0.0144634	4.66037e-05	2.41125e-06	1.22263e-07	0.0018372	1.16296e-05	1.82269e-07		bcin_chr_8:2,235,736..2,236,879(+)
798	Bcin08g06000	Spe	14	0.32482	-0.0166899	0.152205	0.0348922		-3.82585e-07	-0.00744931	1.37286e-05	2.24969e-07	3.03179e-08	0.000842538	1.04812e-05	1.36415e-07		bcin_chr_8:2,237,293..2,239,138(-)		Glycosyltransferase, DXD sugar-binding motif;Nucleotide-diphospho-sugar transferases;Initiation-specific alpha-1,6-mannosyltransferase Och1-like	Glycosyltransferase, DXD sugar-binding motif		Nucleotide-diphospho-sugar transferases		integral component of membrane	alpha-1,6-mannosyltransferase activity		2.4.1.- (Hexosyltransferases.)
799	Bcin08g06010	SpeVir	39	0.319329	-9.51848e-05	0.143695	0.0019034		-3.52474e-07	-0.0025959	1.42487e-05	2.51973e-07	3.54033e-07	0.00246869	1.5552e-05	4.18079e-07		bcin_chr_8:2,240,703..2,243,062(+)
800	Bcin08g06040	Vir	18	0.436137	-0.0057023	0.196279	0.029727		-4.89104e-08	-0.00428513	2.13889e-05	6.15567e-07	5.22077e-07	0.00736232	1.71053e-05	4.79567e-07		bcin_chr_8:2,258,659..2,262,228(+)	Bcagc1	EF-hand domain;Mitochondrial carrier protein;EF-hand domain pair;Mitochondrial substrate/solute carrier;EF-Hand 1, calcium-binding site;Mitochondrial carrier domain superfamily	EF-hand domain;Mitochondrial substrate/solute carrier	EF-hand domain	Mitochondrial carrier domain superfamily;EF-hand domain pair		integral component of membrane;mitochondrial inner membrane	ATP transmembrane transporter activity;calcium ion binding	transmembrane transport
801	Bcin08g06050	Vir	31	0.337156	0.00181259	0.162442	-0.00636728		7.92866e-08	0.000827006	1.2671e-05	1.70561e-07	-4.00105e-07	8.25286e-05	2.65331e-05	1.04527e-06		bcin_chr_8:2,262,478..2,265,343(+)		Clr5 domain	Clr5 domain
802	Bcin08g06110	Spe	31	0.151419	0.00966842	0.220768	-0.00807131		6.36988e-07	0.00522598	3.82452e-05	1.35234e-06	-2.03663e-07	-0.00249332	1.89236e-05	5.27051e-07		bcin_chr_8:2,283,014..2,284,912(+)		Glycoside hydrolase, family 76;Six-hairpin glycosidase superfamily;Mannan endo-1,6-alpha-mannosidase	Glycoside hydrolase, family 76		Six-hairpin glycosidase superfamily			catalytic activity;mannan endo-1,6-alpha-mannosidase activity	carbohydrate catabolic process	3.2.1.101 (Mannan endo-1,6-alpha-mannosidase)
803	Bcin08g06120	Spe	93	0.357047	0.0184481	0.248487	-0.0272101		1.18122e-06	0.00693444	1.85011e-05	4.55351e-07	-8.51436e-07	-0.00557917	1.70515e-05	4.72677e-07		bcin_chr_8:2,285,017..2,287,863(+)										2.1.1.37 (DNA (cytosine-5-)-methyltransferase)
804	Bcin08g06130	Vir	44	0.238158	0.00559137	0.0949062	-0.00537913		2.31419e-07	-7.5736e-06	1.75273e-05	4.10613e-07	-1.48397e-07	0.00358743	2.29426e-05	8.35844e-07		bcin_chr_8:2,287,887..2,288,870(+)
805	Bcin08g06150	Vir	30	0.324409	0.0160902	0.0588746	-0.047394		3.55759e-07	0.00245039	1.03667e-05	1.03833e-07	-1.32184e-06	-0.00957264	1.71263e-05	4.5982e-07		bcin_chr_8:2,293,585..2,296,059(+)		YAP-binding/ALF4/Glomulin;YAP1-binding protein 1/2	YAP-binding/ALF4/Glomulin						cellular response to oxidative stress
806	Bcin08g06230	Vir	14	0.247208	-0.0166026	0.00885519	0.0632209		3.0266e-07	0.000576796	1.33929e-05	1.78858e-07	9.42295e-07	0.0156604	3.12857e-05	1.56108e-06		bcin_chr_8:2,319,936..2,323,776(-)		Low temperature requirement A	Low temperature requirement A				integral component of membrane
807	Bcin08g06260	SpeVir	5	0.00489394	-0.0242601	0.000597781	0.0763219		-7.88816e-07	-0.00307448	4.53e-05	2.13807e-06	1.89766e-06	0.0318012	3.73053e-05	1.81411e-06		bcin_chr_8:2,335,780..2,336,940(+)	Bccox16	Cytochrome c oxidase assembly protein COX16	Cytochrome c oxidase assembly protein COX16				integral component of membrane;mitochondrial inner membrane;mitochondrial membrane
808	Bcin08g06480	Spe	12	0.0580807	-0.0172746	0.0811035	0.0236581		-1.19181e-06	-0.0139466	2.79583e-05	1.01021e-06	6.03912e-07	0.00630223	1.06228e-05	1.61506e-07		bcin_chr_8:2,388,343..2,391,236(+)	Bcspt8	WD40 repeat;WD40-repeat-containing domain superfamily		WD40 repeat	WD40-repeat-containing domain superfamily			protein binding
809	Bcin08g06510	Spe	29	0.157412	-0.032283	0.0669068	0.0688672		-9.99879e-07	-0.0119364	2.60862e-05	9.88542e-07	7.16404e-07	0.00939139	1.2029e-05	1.85617e-07		bcin_chr_8:2,396,275..2,397,937(-)		Cytochrome P450;Cytochrome P450 superfamily	Cytochrome P450		Cytochrome P450 superfamily			heme binding;iron ion binding;oxidoreductase activity, acting on paired donors, with incorporation or reduction of molecular oxygen	oxidation-reduction process;pathogenesis	1.14.-.- (Acting on paired donors, with incorporation or reduction of molecular oxygen. The oxygen incorporated need not be derived from O(2).)
810	Bcin08g06530	Spe	1	0.000115305	-0.062764	0.00157923	0.073471		-4.79472e-06	-0.0613178	0.0001694	1.04087e-05	1.57577e-06	0.0123077	1.62105e-05	3.4875e-07		bcin_chr_8:2,400,432..2,401,025(-)
811	Bcin08g06540	Spe	3	0.00337974	-0.0540614	2.10217e-05	0.108577		-1.7555e-06	-0.0244717	1.62e-05	5.19554e-07	1.06714e-06	0.0178291	1.41053e-05	3.47243e-07		bcin_chr_8:2,401,041..2,402,515(+)		Histone H3/CENP-A;Histone H2A/H2B/H3;Histone-fold	Histone H2A/H2B/H3	Histone H3/CENP-A	Histone-fold		nucleosome;nucleus	DNA binding;protein heterodimerization activity
812	Bcin08g06550	Vir	17	0.35976	0.0240498	0.0615212	-0.0205527		2.94172e-06	0.0230108	2.80059e-05	9.17963e-07	-2.98341e-06	-0.0325379	4.62663e-05	2.30606e-06		bcin_chr_8:2,405,441..2,407,254(+)	Bcinp54	Inositol polyphosphate-related phosphatase;Endonuclease/exonuclease/phosphatase superfamily		Inositol polyphosphate-related phosphatase	Endonuclease/exonuclease/phosphatase superfamily		integral component of membrane		phosphatidylinositol dephosphorylation
813	Bcin08g06570	Spe	7	0.274152	0.00785168	0.0115804	0.0745158		2.70508e-06	0.0357401	0.000142457	1.02622e-05	-1.80859e-07	-0.0018886	1.45263e-05	2.74703e-07		bcin_chr_8:2,412,539..2,414,814(+)		Fusarinine C esterase SidJ;Alpha/Beta hydrolase fold	Fusarinine C esterase SidJ		Alpha/Beta hydrolase fold
814	Bcin08g06620	Spe	1	0.000286199	-0.0568457	0.00611351	0.0615035		-3.87285e-06	-0.0406893	5.19e-05	2.14338e-06	2.08983e-06	0.0174879	1.27368e-05	3.62232e-07		bcin_chr_8:2,426,703..2,430,133(+)	Bchox8	Homeobox domain;Homeobox-like domain superfamily;Homeobox, conserved site	Homeobox domain	Homeobox domain	Homeobox-like domain superfamily		nucleus	DNA binding;DNA-binding transcription factor activity, RNA polymerase II-specific	regulation of transcription, DNA-templated
815	Bcin08g06630	Spe	6	0.00210493	-0.0551963	0.00208326	0.0899601		-3.1748e-06	-0.0349596	4.98333e-05	2.09133e-06	2.04623e-06	0.0242306	1.42105e-05	4.19574e-07		bcin_chr_8:2,431,074..2,437,377(+)	Bcdnf3	P-type ATPase;P-type ATPase, subfamily IV;P-type ATPase, A domain superfamily;P-type ATPase, phosphorylation site;P-type ATPase, transmembrane domain superfamily;P-type ATPase, cytoplasmic domain N;P-type ATPase, C-terminal;P-type ATPase, N-terminal;HAD-like superfamily	P-type ATPase, N-terminal;P-type ATPase, C-terminal		HAD-like superfamily;P-type ATPase, A domain superfamily;P-type ATPase, cytoplasmic domain N;P-type ATPase, transmembrane domain superfamily	P-type ATPase;P-type ATPase, subfamily IV	integral component of membrane	ATP binding;ATPase-coupled intramembrane lipid transporter activity;magnesium ion binding;nucleotide binding	phospholipid transport	7.6.2.1 (P-type phospholipid transporter)
816	Bcin08g06640	Spe	17	0.001122	-0.0566122	0.00307642	0.07914		-3.66772e-06	-0.0416922	6.88353e-05	3.39899e-06	2.21146e-06	0.0226918	2.04334e-05	6.15252e-07		bcin_chr_8:2,437,478..2,443,182(-)	Bchfm1	Helicase, C-terminal;Sec63 domain;DEAD/DEAH box helicase domain;Helicase superfamily 1/2, ATP-binding domain;P-loop containing nucleoside triphosphate hydrolase	DEAD/DEAH box helicase domain;Helicase, C-terminal;Sec63 domain	Helicase superfamily 1/2, ATP-binding domain;Helicase, C-terminal;Sec63 domain	P-loop containing nucleoside triphosphate hydrolase			ATP binding;hydrolase activity;nucleic acid binding		3.6.4.12 (DNA helicase)
817	Bcin08g06660	Spe	2	0.163164	-0.0357509	0.0597547	0.0113078		-4.0756e-06	-0.039813	6.43e-05	3.12561e-06	1.64799e-06	0.0183242	1.58421e-05	3.62977e-07		bcin_chr_8:2,447,080..2,450,419(-)
818	Bcin08g06670	Spe	7	0.00434822	-0.0205752	0.00682586	0.0681246		-2.39069e-07	-0.00313007	3.85857e-05	1.41245e-06	7.89989e-07	0.0158542	2.01203e-05	7.41834e-07		bcin_chr_8:2,452,872..2,456,831(-)	Bchop1	Zinc finger, PHD-type;HORMA domain;Zinc finger, FYVE/PHD-type;Zinc finger, PHD-type, conserved site;HORMA domain superfamily	HORMA domain	Zinc finger, PHD-type	HORMA domain superfamily;Zinc finger, FYVE/PHD-type			metal ion binding
819	Bcin08g06710	Vir	8	0.164326	-0.0108795	0.124923	0.0390192		-3.08964e-07	-0.0037762	1.9375e-05	4.70638e-07	7.37718e-07	0.0220103	6.42237e-05	4.36023e-06		bcin_chr_8:2,470,388..2,471,767(+)							integral component of membrane
820	Bcin08g06720	Vir	55	0.31574	-0.000290945	0.22597	0.000935523		3.27533e-07	0.000987455	1.34964e-05	2.39239e-07	-3.16461e-07	-0.00171718	2.61895e-05	1.00954e-06		bcin_chr_8:2,472,546..2,474,109(+)
821	Bcin08g06740	Spe	11	0.24035	-0.00558366	0.153607	0.0125339		-2.6291e-07	0.000573222	2.47455e-05	7.91915e-07	3.74512e-07	0.00230973	1.10813e-05	2.02923e-07		bcin_chr_8:2,485,206..2,487,402(+)		Cyclophilin-type peptidyl-prolyl cis-trans isomerase domain;U box domain;Cyclophilin-type peptidyl-prolyl cis-trans isomerase, conserved site;Cyclophilin-like domain superfamily	Cyclophilin-type peptidyl-prolyl cis-trans isomerase domain	U box domain	Cyclophilin-like domain superfamily		nucleus	peptidyl-prolyl cis-trans isomerase activity;ubiquitin-protein transferase activity	protein folding;protein peptidyl-prolyl isomerization;protein ubiquitination	5.2.1.8 (Peptidylprolyl isomerase)
822	Bcin08g06780	Spe	11	0.666976	0.0058966	0.173642	-0.0256444		-3.65855e-07	-0.0014121	2.45727e-05	7.21122e-07	-1.44164e-07	0.000169398	1.27751e-05	1.53132e-07		bcin_chr_8:2,497,037..2,499,114(+)		NADH:ubiquinone oxidoreductase, 51kDa subunit, conserved site;NADH ubiquinone oxidoreductase, F subunit;NADH-ubiquinone oxidoreductase 51kDa subunit, FMN-binding domain;Soluble ligand binding domain;NADH-ubiquinone oxidoreductase 51kDa subunit, iron-sulphur binding domain;NADH-ubiquinone oxidoreductase 51kDa subunit, iron-sulphur binding domain superfamily;NADH-ubiquinone oxidoreductase 51kDa sub…	NADH-ubiquinone oxidoreductase 51kDa subunit, FMN-binding domain;Soluble ligand binding domain;NADH-ubiquinone oxidoreductase 51kDa subunit, iron-sulphur binding domain	NADH-ubiquinone oxidoreductase 51kDa subunit, iron-sulphur binding domain	NADH-ubiquinone oxidoreductase 51kDa subunit, iron-sulphur binding domain superfamily;NADH-ubiquinone oxidoreductase 51kDa subunit, FMN-binding domain superfamily	NADH ubiquinone oxidoreductase, F subunit	mitochondrial inner membrane;respirasome	4 iron, 4 sulfur cluster binding;FMN binding;NAD binding;NADH dehydrogenase (ubiquinone) activity;metal ion binding;oxidoreductase activity, acting on NAD(P)H	oxidation-reduction process	7.1.1.2 (NADH:ubiquinone reductase (H(+)-translocating))
823	Bcin08g06840	Vir	22	0.201958	0.0101976	0.0727632	-0.0127896		5.52873e-07	0.0054407	1.35864e-05	1.97839e-07	-9.61517e-08	0.00350196	2.48373e-05	1.0832e-06		bcin_chr_8:2,517,524..2,520,218(-)		PLC-like phosphodiesterase, TIM beta/alpha-barrel domain superfamily			PLC-like phosphodiesterase, TIM beta/alpha-barrel domain superfamily		integral component of membrane	phosphoric diester hydrolase activity	lipid metabolic process
824	Bcin08g07110	Spe	178	0.0105167	-0.0556861	0.0056496	0.0960021		-2.26435e-06	-0.0256702	2.98781e-05	1.07431e-06	1.44768e-06	0.0187168	1.80396e-05	5.15031e-07		bcin_chr_8:2,598,524..2,601,933(+)		NACHT nucleoside triphosphatase;P-loop containing nucleoside triphosphate hydrolase	NACHT nucleoside triphosphatase		P-loop containing nucleoside triphosphate hydrolase					2.7.6.2 (Thiamine diphosphokinase)
825	Bcin09g00170	Vir	6	0.108611	-0.0233685	0.00534568	0.0737204		-3.92807e-07	-0.00753927	1.20167e-05	1.55702e-07	1.22435e-06	0.0183263	2.11579e-05	7.29141e-07		bcin_chr_9:61,646..66,389(+)	BcgaaR	Zn(2)-C6 fungal-type DNA-binding domain;Transcription factor domain, fungi;Zn(2)-C6 fungal-type DNA-binding domain superfamily	Zn(2)-C6 fungal-type DNA-binding domain;Transcription factor domain, fungi	Zn(2)-C6 fungal-type DNA-binding domain;Transcription factor domain, fungi	Zn(2)-C6 fungal-type DNA-binding domain superfamily		host cell nucleus;nucleus	DNA binding;DNA-binding transcription factor activity, RNA polymerase II-specific;zinc ion binding	regulation of transcription, DNA-templated;transcription, DNA-templated	4.2.1.10 (3-dehydroquinate dehydratase)
826	Bcin09g00410	Vir	30	0.376161	-0.00645136	0.314321	0.0285474		-6.78769e-07	-0.00352235	1.008e-05	1.0156e-07	2.76157e-06	0.0263436	4.17439e-05	1.80304e-06		bcin_chr_9:161,878..162,732(+)							integral component of membrane
827	Bcin09g00430	Vir	43	0.330244	0.0140541	0.169157	-0.0445683		6.35579e-07	0.00429399	1.19837e-05	1.6347e-07	-8.47625e-07	-0.00878884	1.9366e-05	5.4716e-07		bcin_chr_9:170,057..171,141(+)
828	Bcin09g00500	Vir	18	0.287934	0.000857848	0.00381193	-0.000861013		1.01419e-07	0.00135872	1.05333e-05	7.90749e-08	-1.23402e-06	-0.0145863	0.000113398	7.64e-06		bcin_chr_9:194,835..195,637(-)
829	Bcin09g00530	Vir	10	0.671191	-0.00513482	0.284326	0.0093271		-7.74489e-08	-0.00158851	9.64e-06	6.63904e-08	1.00647e-06	0.011701	2.85158e-05	1.33524e-06		bcin_chr_9:201,056..202,830(+)		Major intrinsic protein;Aquaporin-like	Major intrinsic protein		Aquaporin-like		integral component of membrane;membrane	channel activity	transmembrane transport
830	Bcin09g00890	Vir	30	0.348322	-0.0134975	0.434537	0.0185726		-1.3894e-06	-0.0105441	1.50067e-05	2.73262e-07	1.06153e-06	0.00958034	1.34912e-05	2.93721e-07		bcin_chr_9:331,418..332,334(-)							integral component of membrane
831	Bcin09g00900	Vir	31	0.525793	-0.00232242	0.18434	-0.0140835		-6.14524e-07	-0.00378223	1.33742e-05	2.12178e-07	-2.52381e-07	4.2585e-05	1.24686e-05	2.18254e-07		bcin_chr_9:339,529..340,216(-)							integral component of membrane
832	Bcin09g00970	Vir	34	0.430539	0.00799026	0.158452	-0.0212971		1.20978e-07	0.00204948	1.32853e-05	2.42262e-07	-2.73467e-07	-0.00258923	1.8805e-05	5.39656e-07		bcin_chr_9:369,540..371,937(+)
833	Bcin09g01020	Vir	16	0.407349	-0.00722522	0.195576	0.00541943		-8.50919e-07	-0.00618185	1.445e-05	3.16677e-07	7.96011e-07	0.00481731	2.56382e-05	9.02924e-07		bcin_chr_9:385,358..386,965(-)		Ribonuclease/ribotoxin			Ribonuclease/ribotoxin			RNA binding;ribonuclease activity
834	Bcin09g01110	Vir	16	0.228504	-0.0102983	0.258389	0.0120177		-1.36401e-06	-0.00912277	1.68813e-05	3.66631e-07	1.44682e-06	0.0117745	2.67632e-05	9.75355e-07		bcin_chr_9:409,026..412,107(+)		Cellulose-binding domain, fungal;Glycoside hydrolase, family 7;Concanavalin A-like lectin/glucanase domain superfamily	Glycoside hydrolase, family 7	Cellulose-binding domain, fungal	Concanavalin A-like lectin/glucanase domain superfamily		extracellular region	cellulose binding;hydrolase activity, hydrolyzing O-glycosyl compounds	carbohydrate metabolic process;cellulose catabolic process	3.2.1.- (Glycosidases, i.e. enzymes hydrolyzing O- and S-glycosyl compounds.)
835	Bcin09g01320	Vir	16	0.169279	-0.00387722	0.210965	0.0144914		-2.53029e-08	0.000258645	2.14e-05	5.54912e-07	1.11805e-07	0.00301655	3.01645e-05	1.32269e-06		bcin_chr_9:500,257..502,576(+)		Isocitrate lyase;Pyruvate/Phosphoenolpyruvate kinase-like domain superfamily;Isocitrate lyase/phosphorylmutase, conserved site	Isocitrate lyase		Pyruvate/Phosphoenolpyruvate kinase-like domain superfamily	Isocitrate lyase		catalytic activity;isocitrate lyase activity;metal ion binding;methylisocitrate lyase activity	carboxylic acid metabolic process	4.1.3.1 (Isocitrate lyase)
836	Bcin09g01330	Spe	9	0.048	-0.0133268	0.0787091	0.0365038		3.16337e-07	-0.000758894	4.20556e-05	1.72524e-06	-6.16113e-07	-0.00477692	2.34386e-05	7.86443e-07		bcin_chr_9:502,813..506,294(-)	Bcprp24	RNA recognition motif domain;HAT (Half-A-TPR) repeat;LSM-interacting domain;Tetratricopeptide-like helical domain superfamily;Occluded RNA-recognition motif;Prp24, RNA recognition motif2;RNA-binding domain superfamily	RNA recognition motif domain;LSM-interacting domain;Occluded RNA-recognition motif	RNA recognition motif domain;HAT (Half-A-TPR) repeat	Tetratricopeptide-like helical domain superfamily;RNA-binding domain superfamily			RNA binding;nucleic acid binding;protein binding	RNA processing;mRNA processing
837	Bcin09g01370	Spe	9	0.283904	0.0134608	0.360589	0.00963224		1.80106e-06	0.0142479	4.95444e-05	2.09468e-06	-1.15003e-06	-0.0086075	2.69708e-05	9.40126e-07		bcin_chr_9:515,111..517,284(+)		Zinc finger, FYVE/PHD-type			Zinc finger, FYVE/PHD-type
838	Bcin09g01380	Vir	15	0.17641	0.0078178	0.180904	-0.0167795		8.3743e-07	0.00736468	2.02867e-05	5.0039e-07	-9.72627e-07	-0.0106819	7.59509e-05	4.5625e-06		bcin_chr_9:517,490..519,250(-)							integral component of membrane
839	Bcin09g01390	Vir	3	0.00670349	-0.0115634	7.43256e-05	0.0286794		6.9032e-07	0.000223445	2.36e-05	6.93123e-07	-9.68974e-07	-0.0106006	5.97544e-05	3.01554e-06		bcin_chr_9:519,280..521,486(-)	Bcutp15	WD40 repeat;U3 small nucleolar RNA-associated protein 15, C-terminal;WD40 repeat, conserved site;G-protein beta WD-40 repeat;WD40-repeat-containing domain superfamily	WD40 repeat;U3 small nucleolar RNA-associated protein 15, C-terminal	WD40 repeat	WD40-repeat-containing domain superfamily		nucleolus	protein binding	rRNA processing	2.3.1.48 (Histone acetyltransferase)
840	Bcin09g01400	Vir	4	0.034112	-0.0370327	5.9202e-05	0.0958267		-1.26922e-06	-0.0134128	1.4525e-05	2.40878e-07	2.66995e-06	0.034516	2.52368e-05	9.29537e-07		bcin_chr_9:525,651..527,598(-)		Cyclophilin-type peptidyl-prolyl cis-trans isomerase domain;Tetratricopeptide-like helical domain superfamily;Tetratricopeptide repeat;Cyclophilin-type peptidyl-prolyl cis-trans isomerase, conserved site;Cyclophilin-like domain superfamily	Cyclophilin-type peptidyl-prolyl cis-trans isomerase domain	Tetratricopeptide repeat	Tetratricopeptide-like helical domain superfamily;Cyclophilin-like domain superfamily			peptidyl-prolyl cis-trans isomerase activity;protein binding	protein folding;protein peptidyl-prolyl isomerization	5.2.1.8 (Peptidylprolyl isomerase)
841	Bcin09g01430	Vir	7	0.180554	-0.0295802	0.0980239	0.0926275		-3.08235e-07	-0.00589198	8.88571e-06	8.88001e-08	2.20383e-06	0.0268714	3.48571e-05	1.58808e-06		bcin_chr_9:533,837..536,445(+)
842	Bcin09g01470	Vir	5	0.0393897	-0.0395242	0.000446934	0.0966979		-9.02247e-07	-0.0175958	3.94e-05	5.25858e-06	5.85299e-07	0.00847167	1.30526e-05	1.7671e-07		bcin_chr_9:547,830..549,304(-)
843	Bcin09g01480	Vir	2	0.0249677	-0.00904916	0.000391907	0.0116918		1.41087e-07	-0.0100687	2.6e-05	8.6866e-07	-6.93919e-07	-0.00114857	2.12105e-05	6.41311e-07		bcin_chr_9:553,046..554,989(+)
844	Bcin09g01520	Spe	8	0.451528	0.0109442	0.380344	-0.0198184		5.42227e-07	0.00833632	3.3925e-05	1.37532e-06	-4.44874e-07	-0.00497602	1.34868e-05	2.80266e-07		bcin_chr_9:562,638..566,925(-)	Bcefr3	Protein EFR3							protein localization to plasma membrane
845	Bcin09g01540	Spe	13	0.194532	0.00597991	0.193903	-0.00716797		7.6697e-07	0.00794114	3.67385e-05	1.46399e-06	-4.1902e-07	-0.00249685	1.98057e-05	5.52713e-07		bcin_chr_9:569,180..572,810(-)		Heterokaryon incompatibility	Heterokaryon incompatibility
846	Bcin09g01570	Vir	15	0.233784	-0.0172852	0.332567	0.02309		-1.25231e-06	-0.00954211	1.24e-05	2.49222e-07	5.1766e-07	0.00494796	1.19158e-05	1.49822e-07		bcin_chr_9:576,689..578,523(+)		Methyltransferase domain;S-adenosyl-L-methionine-dependent methyltransferase	Methyltransferase domain		S-adenosyl-L-methionine-dependent methyltransferase		integral component of membrane
847	Bcin09g01650	Vir	7	0.355363	-0.00848215	0.164969	0.0464309		7.12776e-07	0.00342178	1.31143e-05	1.84593e-07	5.19258e-08	0.00256806	1.48421e-05	2.83794e-07		bcin_chr_9:632,957..635,418(+)		BTB/POZ domain;Ankyrin repeat;SKP1/BTB/POZ domain superfamily;Ankyrin repeat-containing domain superfamily	BTB/POZ domain	BTB/POZ domain;Ankyrin repeat	Ankyrin repeat-containing domain superfamily;SKP1/BTB/POZ domain superfamily			protein binding
848	Bcin09g01660	Vir	10	0.649937	0.00246891	0.454235	0.000152182		-4.4153e-08	-0.000712632	1.287e-05	1.75075e-07	5.67332e-07	0.00261762	1.62211e-05	3.33511e-07		bcin_chr_9:636,978..638,076(+)
849	Bcin09g01690	SpeVir	9	0.0443943	-0.00512234	0.275331	-0.000675233		-9.2564e-07	-0.00912442	4.38e-05	1.58452e-06	7.55763e-07	0.00434533	3.68538e-05	1.57611e-06		bcin_chr_9:641,771..642,650(+)		GNAT domain;Acyl-CoA N-acyltransferase	GNAT domain		Acyl-CoA N-acyltransferase			N-acetyltransferase activity		2.3.1.- (Transferring groups other than amino-acyl groups.)
850	Bcin09g01700	Spe	22	0.0890857	-0.00932098	0.317719	-0.0133192		-1.82086e-06	-0.0130008	3.98091e-05	1.31576e-06	1.00707e-06	0.00800963	2.83254e-05	1.06334e-06		bcin_chr_9:644,221..645,694(+)	Bcfmp10	Thioesterase domain;HotDog domain superfamily	Thioesterase domain		HotDog domain superfamily		integral component of membrane			3.1.2.2 (Palmitoyl-CoA hydrolase)
851	Bcin09g01710	Spe	3	0.0342891	-0.0405868	7.05138e-05	0.11004		-4.50673e-07	-0.00461829	1.47333e-05	1.4633e-07	9.53562e-07	0.0144777	1.46316e-05	3.25472e-07		bcin_chr_9:646,646..647,504(-)
852	Bcin09g02260	Vir	6	0.0480573	-0.0197177	0.000126607	0.0619577		9.75687e-08	0.000640419	1.38167e-05	1.88591e-07	8.85062e-07	0.0130764	1.4e-05	3.67468e-07		bcin_chr_9:828,283..830,667(+)		PLC-like phosphodiesterase, TIM beta/alpha-barrel domain superfamily			PLC-like phosphodiesterase, TIM beta/alpha-barrel domain superfamily			phosphoric diester hydrolase activity	lipid metabolic process
853	Bcin09g02330	Spe	5	0.119195	0.00398547	0.177854	0.00587032		-1.08229e-07	0.000624444	3.214e-05	1.1514e-06	5.42851e-07	0.0071454	1.56e-05	3.06837e-07		bcin_chr_9:846,315..847,360(+)		Cytidine and deoxycytidylate deaminase domain;Cytidine deaminase-like	Cytidine and deoxycytidylate deaminase domain		Cytidine deaminase-like			catalytic activity		3.5.4.33 (tRNA(adenine(34)) deaminase)
854	Bcin09g02570	Vir	6	0.233398	0.00439222	0.0432428	-0.00691779		1.75412e-07	-0.000504174	9.86667e-06	9.93757e-08	3.61688e-07	0.00570711	2.24737e-05	7.75043e-07		bcin_chr_9:929,500..931,459(-)									transcription by RNA polymerase I
855	Bcin09g02620	Vir	14	0.030007	-0.0431559	0.00113814	0.122571		-1.92463e-06	-0.0179529	1.69143e-05	4.0074e-07	3.69668e-06	0.061382	0.000133218	1.08513e-05		bcin_chr_9:941,967..946,990(-)
856	Bcin09g02630	Vir	4	0.107169	-0.0343219	0.000387763	0.117578		-1.51786e-06	-0.0129614	1.5725e-05	2.33674e-07	4.55544e-06	0.0744335	0.000202658	1.6041e-05		bcin_chr_9:948,403..951,540(+)		K Homology domain;K Homology domain, type 1;K Homology domain, type 1 superfamily	K Homology domain, type 1	K Homology domain	K Homology domain, type 1 superfamily			RNA binding;nucleic acid binding		3.1.2.15 (Deleted entry)
857	Bcin09g02720	Vir	32	0.372362	-0.00113525	0.081623	0.00944629		7.52676e-08	0.000662918	1.26938e-05	1.5183e-07	3.70978e-07	0.00420388	1.89605e-05	6.55749e-07		bcin_chr_9:980,005..982,823(+)		Six-hairpin glycosidase superfamily;Alpha-L-rhamnosidase C-terminal domain	Alpha-L-rhamnosidase C-terminal domain		Six-hairpin glycosidase superfamily			catalytic activity		3.2.1.40 (Alpha-L-rhamnosidase)
858	Bcin09g02730	Vir	28	0.241405	-0.0121275	0.0792923	0.0422076		1.35486e-07	-7.98274e-05	1.13929e-05	1.41953e-07	1.91599e-07	0.00445138	1.42932e-05	4.24716e-07		bcin_chr_9:983,276..986,489(-)		FAD-binding domain;FAD/NAD(P)-binding domain superfamily	FAD-binding domain		FAD/NAD(P)-binding domain superfamily			FAD binding		4.1.1.4 (Acetoacetate decarboxylase)
859	Bcin09g02900	Vir	36	0.3678	-0.00487484	0.286102	0.0105559		5.49157e-08	-2.01803e-05	1.34306e-05	2.09008e-07	-9.44845e-08	-0.000401476	1.44357e-05	2.81529e-07		bcin_chr_9:1,041,764..1,044,190(+)		Major facilitator superfamily;MFS transporter superfamily	Major facilitator superfamily		MFS transporter superfamily		integral component of membrane	transmembrane transporter activity	transmembrane transport
860	Bcin09g02980	Vir	26	0.0486265	-0.0211135	0.0338223	0.0477478		-3.65365e-07	-0.00387091	1.11231e-05	1.40918e-07	4.20628e-07	0.0103519	2.16194e-05	1.00085e-06		bcin_chr_9:1,068,768..1,075,756(+)		E3 ubiquitin-protein ligase substrate receptor Mms22	E3 ubiquitin-protein ligase substrate receptor Mms22				nucleus		DNA repair;cellular response to DNA damage stimulus;replication fork processing	3.6.4.3 (Transferred entry: 5.6.1.1)
861	Bcin09g03000	Vir	15	0.407084	0.00963529	0.0889811	-0.0271155		3.60532e-07	0.00270204	1.162e-05	1.68755e-07	-6.12927e-07	-0.00333373	1.12281e-05	1.86206e-07		bcin_chr_9:1,079,367..1,080,316(-)
862	Bcin09g03270	Vir	20	0.404037	-0.00258635	0.352413	-0.00387113		-8.62363e-07	-0.00444257	1.1805e-05	1.8104e-07	1.65636e-06	0.0174914	3.03526e-05	1.36918e-06		bcin_chr_9:1,170,858..1,175,800(-)		Protein kinase domain;Serine/threonine-protein kinase, active site;Protein kinase-like domain superfamily;Protein kinase, ATP binding site;Fungal kinase associated-1 domain	Protein kinase domain;Fungal kinase associated-1 domain	Protein kinase domain	Protein kinase-like domain superfamily			ATP binding;protein kinase activity	protein phosphorylation	2.7.11.1 (Non-specific serine/threonine protein kinase)
863	Bcin09g03280	Vir	13	0.422151	-0.00106585	0.298039	0.00187609		-9.35533e-08	0.00142407	1.37e-05	2.72364e-07	6.97902e-07	0.0075441	1.5587e-05	3.80699e-07		bcin_chr_9:1,176,838..1,180,900(+)		RecF/RecN/SMC, N-terminal;P-loop containing nucleoside triphosphate hydrolase	RecF/RecN/SMC, N-terminal		P-loop containing nucleoside triphosphate hydrolase		Smc5-Smc6 complex;nucleus	ATP binding	double-strand break repair via homologous recombination;sister chromatid cohesion	3.6.-.- (Acting on acid anhydrides.)
864	Bcin09g03300	Vir	7	0.309077	-0.00195755	0.0415247	0.00330374		7.77427e-08	0.000576712	1.02286e-05	1.04944e-07	8.15465e-08	0.000483939	2.62105e-05	1.22299e-06		bcin_chr_9:1,183,884..1,185,056(+)
865	Bcin09g03340	Spe	12	0.377744	-0.0168112	0.0694486	0.0136725		-1.04331e-06	-0.00629982	1.16167e-05	1.40664e-07	-1.68866e-07	0.00177933	1.41316e-05	3.32469e-07		bcin_chr_9:1,210,026..1,212,257(-)		WW domain binding protein 11	WW domain binding protein 11						RNA processing
866	Bcin09g03430	Vir	3	0.168279	-0.0230996	0.0387993	0.0609617		-4.96198e-07	-0.00156386	1.08667e-05	8.0563e-08	2.5608e-06	0.0290958	6.3614e-05	3.99971e-06		bcin_chr_9:1,250,403..1,252,781(-)		Amidase signature domain;Amidase signature (AS) superfamily	Amidase signature domain		Amidase signature (AS) superfamily					6.3.5.7 (Glutaminyl-tRNA synthase (glutamine-hydrolyzing))
867	Bcin09g03450	Vir	35	0.256768	-0.0157839	0.0330676	0.0477623		-4.17809e-07	-0.00249383	9.91714e-06	1.02685e-07	1.21983e-06	0.0144616	2.61624e-05	1.00184e-06		bcin_chr_9:1,254,735..1,258,907(-)
868	Bcin09g03470	Vir	105	0.189457	-0.0261856	0.0764897	0.0493144		-1.01512e-06	-0.00644307	1.26857e-05	1.67553e-07	2.01665e-06	0.0179538	2.08652e-05	7.44063e-07		bcin_chr_9:1,260,535..1,263,617(-)		Ankyrin repeat;Zinc finger C2H2-type;Ankyrin repeat-containing domain;Zinc finger C2H2 superfamily;Ankyrin repeat-containing domain superfamily	Ankyrin repeat-containing domain	Ankyrin repeat;Zinc finger C2H2-type	Ankyrin repeat-containing domain superfamily;Zinc finger C2H2 superfamily			protein binding		3.4.21.72 (IgA-specific serine endopeptidase)
869	Bcin09g03500	Vir	9	0.0453466	-0.035582	0.000117833	0.0942445		-3.08601e-07	-0.00458577	1.05333e-05	8.52219e-08	2.02647e-06	0.0261745	1.7462e-05	5.68083e-07		bcin_chr_9:1,271,427..1,272,099(-)
870	Bcin09g03670	Vir	18	0.204637	0.0222058	0.123168	-0.0573096		1.15128e-06	0.0110661	2.75722e-05	8.3346e-07	-1.94018e-06	-0.0223151	4.00117e-05	1.9786e-06		bcin_chr_9:1,309,104..1,311,334(+)		Amino acid/polyamine transporter I	Amino acid/polyamine transporter I				integral component of membrane;membrane	transmembrane transporter activity	transmembrane transport
871	Bcin09g03820	Vir	25	0.682826	-0.00169728	0.041711	-0.0268613		1.79394e-07	0.0014456	1.0904e-05	7.96494e-08	-7.49195e-07	-0.00751397	1.98905e-05	6.55448e-07		bcin_chr_9:1,350,585..1,353,435(-)		SH3 domain;SH3-like domain superfamily	SH3 domain	SH3 domain	SH3-like domain superfamily			protein binding		3.2.1.14 (Chitinase)
872	Bcin09g03840	Spe	48	0.471985	-0.00688634	0.0981069	0.0435526		5.58756e-07	0.0024839	1.66438e-05	3.79178e-07	9.11675e-07	0.0126265	1.80285e-05	5.06902e-07		bcin_chr_9:1,358,096..1,359,649(+)								nucleic acid binding;zinc ion binding
873	Bcin09g03850	Vir	22	0.31033	0.00418409	0.065571	0.00141148		6.16177e-07	0.00376148	1.50227e-05	3.13814e-07	2.84341e-08	0.0014483	1.98182e-05	7.19471e-07		bcin_chr_9:1,360,209..1,362,262(-)		Transaldolase/Fructose-6-phosphate aldolase;Transaldolase, active site	Transaldolase/Fructose-6-phosphate aldolase					catalytic activity;sedoheptulose-7-phosphate:D-glyceraldehyde-3-phosphate glyceronetransferase activity	carbohydrate metabolic process;pentose-phosphate shunt	2.2.1.2 (Transaldolase)
874	Bcin09g03960	Spe	6	0.42976	-0.0138777	0.510352	-0.0169603		-2.94185e-06	-0.0244927	3.005e-05	9.24455e-07	5.34858e-07	0.00453068	1.03684e-05	1.24147e-07		bcin_chr_9:1,399,488..1,402,433(+)		Zn(2)-C6 fungal-type DNA-binding domain;Fungal transcription factor;Zn(2)-C6 fungal-type DNA-binding domain superfamily	Zn(2)-C6 fungal-type DNA-binding domain;Fungal transcription factor	Zn(2)-C6 fungal-type DNA-binding domain	Zn(2)-C6 fungal-type DNA-binding domain superfamily		host cell nucleus;nucleus	DNA-binding transcription factor activity, RNA polymerase II-specific;zinc ion binding	regulation of transcription, DNA-templated
875	Bcin09g04100	Spe	5	0.376179	-0.0227632	0.648675	-0.0122865		-3.25208e-06	-0.026273	5.272e-05	2.09188e-06	1.48943e-06	0.0107969	9.17895e-06	1.92745e-07		bcin_chr_9:1,450,788..1,455,364(-)		Pal1 cell morphology	Pal1 cell morphology
876	Bcin09g04120	Vir	8	0.373948	-0.0159745	0.15973	0.0389867		-8.59584e-07	-0.00705534	1.1025e-05	1.48226e-07	9.61268e-07	0.0135806	1.9e-05	5.79606e-07		bcin_chr_9:1,458,393..1,459,632(-)	Bcrpc11	Zinc finger, TFIIS-type;Pol III subunit C11, C-terminal zinc ribbon	Zinc finger, TFIIS-type	Zinc finger, TFIIS-type			nucleolus	nucleic acid binding;zinc ion binding	tRNA 3'-trailer cleavage;transcription, DNA-templated	2.7.7.6 (DNA-directed RNA polymerase)
877	Bcin09g04160	Spe	5	0.398553	-0.0177884	0.185513	0.0472678		-6.12558e-07	-0.0041946	1.108e-05	1.32076e-07	8.75078e-07	0.0106251	1.31368e-05	2.80352e-07		bcin_chr_9:1,468,450..1,472,716(-)		Heat shock protein 70 family;ATPase, nucleotide binding domain	Heat shock protein 70 family		ATPase, nucleotide binding domain			ATP binding
878	Bcin09g04170	Spe	3	0.0566795	0.0219977	0.313373	-0.0381704		1.40873e-06	0.0126149	3.49333e-05	1.20137e-06	-1.15474e-06	-0.00344798	1.21404e-05	1.97227e-07		bcin_chr_9:1,474,491..1,478,820(+)	Bcglk	Hexokinase;Hexokinase, binding site;Hexokinase, N-terminal;Hexokinase, C-terminal;ATPase, nucleotide binding domain	Hexokinase, N-terminal;Hexokinase, C-terminal		ATPase, nucleotide binding domain			ATP binding;glucose binding;hexokinase activity;phosphotransferase activity, alcohol group as acceptor	carbohydrate metabolic process;cellular glucose homeostasis;glycolytic process	2.7.1.- (Phosphotransferases with an alcohol group as acceptor.)
879	Bcin09g04540	Vir	14	0.348664	0.00200056	0.295476	-0.0185489		-6.23299e-07	-0.00468193	1.5e-05	3.09916e-07	-6.76539e-07	-0.00471127	1.86842e-05	4.57592e-07		bcin_chr_9:1,586,071..1,588,433(+)										3.4.-.- (Acting on peptide bonds (peptidases).)
880	Bcin09g04550	Spe	18	0.204936	0.0206242	0.0534358	-0.0169808		1.4826e-06	0.0121496	2.42778e-05	7.411e-07	-7.5156e-07	-0.00493626	1.58012e-05	3.82564e-07		bcin_chr_9:1,595,158..1,601,307(+)	Bcswe1	Protein kinase domain;Serine/threonine-protein kinase, active site;Protein kinase-like domain superfamily	Protein kinase domain	Protein kinase domain	Protein kinase-like domain superfamily			ATP binding;protein kinase activity	protein phosphorylation	2.7.11.1 (Non-specific serine/threonine protein kinase)
881	Bcin09g04560	Vir	20	0.44689	0.00498744	0.141908	-0.0108242		4.46622e-07	0.00250645	1.446e-05	2.61829e-07	-1.64165e-07	0.000998523	1.23105e-05	2.35883e-07		bcin_chr_9:1,603,681..1,604,977(+)		NmrA-like domain;NAD(P)-binding domain superfamily	NmrA-like domain		NAD(P)-binding domain superfamily					1.-.-.- (Oxidoreductases.)
882	Bcin09g04570	Vir	29	0.239511	0.00688072	0.0362987	-0.0120967		6.98917e-07	0.0028944	1.42414e-05	2.52503e-07	-6.53598e-07	-0.00467586	2.16661e-05	7.20024e-07		bcin_chr_9:1,606,037..1,608,597(-)		Glucose-methanol-choline oxidoreductase, N-terminal;Glucose-methanol-choline oxidoreductase, C-terminal;Glucose-methanol-choline oxidoreductase;FAD/NAD(P)-binding domain superfamily	Glucose-methanol-choline oxidoreductase, N-terminal;Glucose-methanol-choline oxidoreductase, C-terminal		FAD/NAD(P)-binding domain superfamily			flavin adenine dinucleotide binding;oxidoreductase activity, acting on CH-OH group of donors	oxidation-reduction process	1.1.99.1 (Choline dehydrogenase)
883	Bcin09g04590	Spe	27	0.333757	0.00165082	0.0975882	0.00455059		7.90393e-07	0.00933582	2.46519e-05	7.9537e-07	-4.59814e-07	-0.00601546	1.74698e-05	4.47405e-07		bcin_chr_9:1,619,767..1,623,391(+)		Dynamin central domain;Dynamin, GTPase domain;Dynamin superfamily;P-loop containing nucleoside triphosphate hydrolase	Dynamin superfamily;Dynamin central domain	Dynamin, GTPase domain	P-loop containing nucleoside triphosphate hydrolase			GTP binding;GTPase activity
884	Bcin09g04630	Spe	35	0.204136	0.0106735	0.211421	-0.0226789		7.04295e-07	0.00973563	2.09314e-05	5.97129e-07	-7.12134e-07	-0.00677702	1.35489e-05	2.24609e-07		bcin_chr_9:1,633,477..1,636,726(-)	Bcprp6	HAT (Half-A-TPR) repeat;PRP1 splicing factor, N-terminal;Tetratricopeptide-like helical domain superfamily;Tetratricopeptide repeat;Pre-mRNA-processing factor 6/Prp1/STA1	PRP1 splicing factor, N-terminal;Tetratricopeptide repeat	Tetratricopeptide repeat;HAT (Half-A-TPR) repeat	Tetratricopeptide-like helical domain superfamily		nucleus	protein binding	RNA processing;mRNA splicing, via spliceosome	3.1.21.4 (Type II site-specific deoxyribonuclease)
885	Bcin09g04770	Vir	25	0.0440112	-0.0302652	0.275699	0.0434873		-1.81255e-06	-0.0155168	1.6536e-05	3.76498e-07	8.80055e-07	0.00985951	1.576e-05	3.31757e-07		bcin_chr_9:1,670,382..1,671,172(+)
886	Bcin09g04960	Vir	9	0.126234	-0.015078	0.0221812	0.0293082		3.49091e-08	-0.00528114	1.47889e-05	2.62869e-07	1.49827e-07	0.0109726	4.39766e-05	2.30789e-06		bcin_chr_9:1,728,138..1,734,444(-)	BcareA	Zinc finger, GATA-type;Nitrogen regulatory protein areA, GATA-like domain;Transcription factor GATA	Zinc finger, GATA-type;Nitrogen regulatory protein areA, GATA-like domain	Zinc finger, GATA-type			nucleus	DNA-binding transcription factor activity;sequence-specific DNA binding;zinc ion binding	nitrate assimilation;regulation of transcription, DNA-templated
887	Bcin09g05090	Spe	7	0.31994	0.0021217	0.102332	0.00873519		1.25855e-06	0.017556	3.10714e-05	1.47694e-06	-4.02072e-07	-0.0100749	2.32331e-05	9.14213e-07		bcin_chr_9:1,771,375..1,773,650(-)		DOMON domain;Cytochrome b561/ferric reductase transmembrane;Cellobiose dehydrogenase, cytochrome domain	Cytochrome b561/ferric reductase transmembrane;Cellobiose dehydrogenase, cytochrome domain	DOMON domain;Cytochrome b561/ferric reductase transmembrane			integral component of membrane			1.1.99.18 (Cellobiose dehydrogenase (acceptor))
888	Bcin09g05100	Spe	12	0.550608	0.00322172	0.365776	-0.0140042		1.187e-06	0.00417037	2.75667e-05	9.58724e-07	-1.48916e-06	-0.0175033	2.74035e-05	1.17303e-06		bcin_chr_9:1,776,450..1,781,202(+)
889	Bcin09g05120	Spe	9	0.415657	-0.0074467	0.11572	0.0265428		1.19347e-06	0.0111901	2.89667e-05	1.19373e-06	-4.08431e-07	-0.00259757	1.1848e-05	2.82432e-07		bcin_chr_9:1,783,987..1,785,339(+)		Cytochrome b5-like heme/steroid binding domain;Cytochrome b5, heme-binding site;Cytochrome b5-like heme/steroid binding domain superfamily	Cytochrome b5-like heme/steroid binding domain	Cytochrome b5-like heme/steroid binding domain	Cytochrome b5-like heme/steroid binding domain superfamily		integral component of membrane	heme binding;metal ion binding		1.7.1.1 (Nitrate reductase (NADH))
890	Bcin09g05140	Vir	20	0.339707	-0.0186345	0.0632085	0.0476918		1.79311e-07	0.000692165	1.047e-05	1.39467e-07	4.85705e-07	0.00468869	1.33474e-05	3.54651e-07		bcin_chr_9:1,786,947..1,790,399(-)		Heterokaryon incompatibility	Heterokaryon incompatibility
891	Bcin09g05240	Vir	25	0.290703	-0.00494116	0.243027	0.0156981		5.04525e-08	-8.14522e-05	1.5348e-05	3.11134e-07	1.94816e-07	0.00487598	1.72884e-05	5.01435e-07		bcin_chr_9:1,820,485..1,823,712(+)		Sugar/inositol transporter;Major facilitator, sugar transporter-like;Sugar transporter, conserved site;MFS transporter superfamily	Major facilitator, sugar transporter-like		MFS transporter superfamily	Sugar/inositol transporter	integral component of membrane;membrane	transmembrane transporter activity	transmembrane transport	1.3.1.74 (2-alkenal reductase (NAD(P)(+)))
892	Bcin09g05310	Vir	14	0.365654	0.00343878	0.0581704	0.00908232		1.41252e-06	0.0150491	2.405e-05	7.59802e-07	1.58365e-08	-0.000180193	1.21955e-05	2.13176e-07		bcin_chr_9:1,848,984..1,853,102(+)		Zinc finger, ZZ-type;Next to BRCA1, central domain;ZZZ3, zinc finger, ZZ-type	Zinc finger, ZZ-type;Next to BRCA1, central domain	Zinc finger, ZZ-type				zinc ion binding
893	Bcin09g05390	Vir	10	0.185458	-0.0197092	0.0442639	0.0408132		-1.10382e-06	-0.00729304	1.284e-05	2.13773e-07	1.12799e-06	0.0123942	1.56105e-05	3.59844e-07		bcin_chr_9:1,889,936..1,891,212(+)
894	Bcin09g05570	Vir	5	0.592413	-0.000390372	0.495064	0.0204801		8.86565e-08	-0.00183685	1.456e-05	1.52809e-07	9.09746e-07	0.0114692	1.25684e-05	1.97498e-07		bcin_chr_9:1,941,578..1,943,384(+)		Sugar/inositol transporter;Major facilitator, sugar transporter-like;Sugar transporter, conserved site;MFS transporter superfamily	Major facilitator, sugar transporter-like		MFS transporter superfamily	Sugar/inositol transporter	integral component of membrane;membrane	transmembrane transporter activity	transmembrane transport	6.3.5.7 (Glutaminyl-tRNA synthase (glutamine-hydrolyzing))
895	Bcin09g05610	Vir	9	0.254174	0.0217377	0.248852	-0.0450783		1.97668e-06	0.0142548	2.22333e-05	5.8598e-07	-2.11812e-06	-0.0281062	5.23158e-05	2.99204e-06		bcin_chr_9:1,953,215..1,956,555(+)
896	Bcin09g05620	Vir	20	0.0632419	0.0185429	0.0383205	-0.0501356		2.09382e-06	0.0136014	1.7485e-05	4.34712e-07	-3.46532e-06	-0.0424172	0.000173089	1.20944e-05		bcin_chr_9:1,961,518..1,962,700(+)							integral component of membrane
897	Bcin09g05690	Vir	8	0.522389	0.00277729	0.41821	0.0149356		5.5561e-07	0.00457958	1.31375e-05	2.17873e-07	4.08735e-07	0.000429575	3.09474e-05	1.48824e-06		bcin_chr_9:1,988,849..1,990,665(+)							integral component of membrane
898	Bcin09g05730	Spe	12	0.560335	0.000386106	0.134095	0.0574101		1.26461e-06	0.0121636	2.75583e-05	9.21541e-07	2.43104e-07	0.00299105	1.2614e-05	1.88392e-07		bcin_chr_9:2,006,927..2,009,068(+)
899	Bcin09g05740	SpeVir	13	0.330688	-0.0229837	0.11447	0.0687137		3.90855e-07	0.004048	1.41462e-05	2.37532e-07	-3.10568e-07	-0.00190759	1.12227e-05	1.7964e-07		bcin_chr_9:2,013,911..2,016,132(-)		Tannase/feruloyl esterase;Alpha/Beta hydrolase fold	Tannase/feruloyl esterase		Alpha/Beta hydrolase fold			carboxylic ester hydrolase activity;metal ion binding		3.1.1.- (Carboxylic ester hydrolases.)
900	Bcin09g06100	Vir	24	0.380432	-0.0103257	0.230578	0.0226848		-1.31971e-07	-0.00141074	1.19583e-05	1.37745e-07	5.59146e-08	-0.00238371	2.12105e-05	8.01988e-07		bcin_chr_9:2,121,389..2,123,010(+)
901	Bcin09g06120	Vir	13	0.304559	0.0179259	0.160255	-0.0478159		3.71433e-07	0.00226214	1.18846e-05	1.46412e-07	-1.42853e-06	-0.00827592	1.35304e-05	2.70275e-07		bcin_chr_9:2,127,728..2,130,659(+)	Bczrt1	Zinc/iron permease;Zinc/iron permease, fungal/plant	Zinc/iron permease			Zinc/iron permease, fungal/plant	integral component of membrane;membrane	metal ion transmembrane transporter activity;zinc ion transmembrane transporter activity	metal ion transport;transmembrane transport;zinc ion transmembrane transport	1.3.1.74 (2-alkenal reductase (NAD(P)(+)))
902	Bcin09g06460	Vir	13	0.230831	-0.0278974	0.148336	0.0634433		-3.44776e-07	-0.00392698	1.43692e-05	2.13868e-07	1.01706e-06	0.0171386	2.67935e-05	1.21864e-06		bcin_chr_9:2,288,512..2,289,498(-)
903	Bcin09g06510	Spe	14	0.367606	0.0131595	0.209329	-0.0287038		4.78495e-07	0.00463806	5.30357e-05	2.89448e-06	-2.15444e-07	-0.00236775	1.66241e-05	4.07543e-07		bcin_chr_9:2,304,205..2,307,509(+)		Haem-degrading;Uncharacterised protein family UPF0303;GlcG-like domain superfamily	Haem-degrading		GlcG-like domain superfamily
904	Bcin09g06540	Spe	27	0.112173	0.0144455	0.132159	-0.0242968		1.1448e-06	0.0133187	3.21333e-05	1.20649e-06	-8.5795e-07	-0.00653794	1.55945e-05	3.39878e-07		bcin_chr_9:2,313,004..2,314,484(-)		Xylose isomerase-like, TIM barrel domain;Xylose isomerase-like superfamily	Xylose isomerase-like, TIM barrel domain		Xylose isomerase-like superfamily					1.1.1.25 (Shikimate dehydrogenase)
905	Bcin09g06550	Spe	60	0.0721914	0.000653855	0.169378	0.00202943		3.49912e-07	0.00535654	3.28483e-05	1.10836e-06	-2.73814e-07	-0.00180763	1.87632e-05	4.95233e-07		bcin_chr_9:2,315,575..2,317,871(+)		IBR domain;E3 ubiquitin ligase RBR family	IBR domain	IBR domain				metal ion binding;ubiquitin-protein transferase activity	protein ubiquitination	2.3.2.31 (RBR-type E3 ubiquitin transferase)
906	Bcin09g06600	Vir	13	0.119161	-0.0270449	0.201011	0.0524168		-2.50292e-06	-0.0164404	2.54538e-05	7.74806e-07	2.64913e-06	0.0250971	3.1587e-05	1.25313e-06		bcin_chr_9:2,337,816..2,340,310(+)		NT-type C2 domain;Protein FAM102-like	NT-type C2 domain
907	Bcin09g06710	Spe	16	0.137282	0.00635856	0.212145	-0.0238852		1.61459e-07	0.00359413	5.10125e-05	2.08685e-06	-7.87678e-07	-0.00646985	1.46908e-05	3.14182e-07		bcin_chr_9:2,368,999..2,371,282(+)		Cytochrome P450;Cytochrome P450, E-class, group I;Cytochrome P450, conserved site;Cytochrome P450 superfamily	Cytochrome P450		Cytochrome P450 superfamily		integral component of membrane	heme binding;iron ion binding;monooxygenase activity;oxidoreductase activity, acting on paired donors, with incorporation or reduction of molecular oxygen	oxidation-reduction process;pathogenesis	1.14.-.- (Acting on paired donors, with incorporation or reduction of molecular oxygen. The oxygen incorporated need not be derived from O(2).)
908	Bcin09g06730	Vir	15	0.0822205	-0.0315883	0.0507685	0.0759919		-8.43718e-07	-0.0101275	1.18933e-05	2.50972e-07	1.22266e-06	0.0162496	1.53825e-05	3.46651e-07		bcin_chr_9:2,377,452..2,379,537(-)		Glycoside hydrolase, family 61	Glycoside hydrolase, family 61				extracellular region			3.2.1.4 (Cellulase)
909	Bcin09g06740	Vir	17	0.0405013	-0.0324815	0.010681	0.097553		-6.42471e-07	-0.00685174	1.25471e-05	1.84607e-07	2.17205e-06	0.0332071	3.51331e-05	1.7119e-06		bcin_chr_9:2,381,735..2,382,918(-)
910	Bcin09g06760	Vir	22	0.25494	-0.0142827	0.324787	0.0363373		-1.39062e-06	-0.0106212	1.92273e-05	4.8063e-07	1.69461e-06	0.0146798	2.40144e-05	8.28288e-07		bcin_chr_9:2,387,588..2,389,029(-)		Helicase, C-terminal;P-loop containing nucleoside triphosphate hydrolase		Helicase, C-terminal	P-loop containing nucleoside triphosphate hydrolase					3.6.4.12 (DNA helicase)
911	Bcin09g06780	Spe	20	0.0322933	-0.0282562	0.0129876	0.0604693		-1.61811e-06	-0.0106618	2.379e-05	6.53287e-07	1.59471e-06	0.0150561	1.77632e-05	4.76652e-07		bcin_chr_9:2,391,863..2,392,583(+)
912	Bcin09g06790	Spe	21	0.038498	-0.028368	0.0872381	0.0601663		-1.09357e-06	-0.00869915	1.98381e-05	4.47387e-07	1.04566e-06	0.0109516	1.94085e-05	5.27911e-07		bcin_chr_9:2,392,837..2,394,641(-)
913	Bcin09g06820	Vir	13	0.390054	0.00129644	0.388606	-0.0082645		-2.37383e-07	-0.0026567	1.32154e-05	1.85377e-07	7.78252e-08	0.000633748	1.27045e-05	2.2285e-07		bcin_chr_9:2,405,568..2,407,520(-)		UBX domain;UAS;UBA-like superfamily;Ubiquitin-like domain superfamily;Thioredoxin-like superfamily	UBX domain	UBX domain;UAS	UBA-like superfamily;Thioredoxin-like superfamily;Ubiquitin-like domain superfamily		integral component of membrane	protein binding		2.1.1.297 (Peptide chain release factor N(5)-glutamine methyltransferase)
914	Bcin09g06840	Spe	20	0.321024	0.00854797	0.281146	-0.0298154		-1.51205e-07	-0.0023365	1.5845e-05	3.72991e-07	-2.22068e-07	-0.00150578	1.32789e-05	2.56427e-07		bcin_chr_9:2,412,384..2,415,703(+)		Protein of unknown function DUF4246	Protein of unknown function DUF4246
915	Bcin09g06850	Spe	28	0.510071	0.0100551	0.103544	0.0173106		1.55452e-06	0.0175275	2.36357e-05	7.31624e-07	-3.27912e-07	-0.0022748	1.11278e-05	1.4536e-07		bcin_chr_9:2,417,263..2,419,998(-)		Heterokaryon incompatibility	Heterokaryon incompatibility
916	Bcin09g06910	Spe	4	0.0235878	-0.0133846	0.000211643	0.0365582		6.46936e-08	0.00594216	3.2025e-05	1.20312e-06	3.60803e-07	-0.0009267	2.75526e-05	1.18155e-06		bcin_chr_9:2,446,078..2,449,574(+)		Membrane transport protein	Membrane transport protein				integral component of membrane		transmembrane transport
917	Bcin09g06920	Vir	10	0.307378	-0.013191	0.0375902	0.0392981		-6.07861e-08	-0.000725905	9.18e-06	7.55785e-08	8.14794e-07	0.0137311	2.34421e-05	1.05607e-06		bcin_chr_9:2,451,741..2,452,828(+)
918	Bcin09g07000	Vir	3	0.351941	-8.97203e-05	0.0110208	0.0382866		2.73816e-06	0.0307952	3.84667e-05	1.58924e-06	-2.2404e-06	-0.0280553	4.50175e-05	2.35165e-06		bcin_chr_9:2,470,079..2,473,051(+)		GAT domain;ENTH/VHS	GAT domain		ENTH/VHS				intracellular protein transport
919	Bcin09g07060	Vir	8	0.347756	-0.0218713	0.177901	0.0453002		-1.18638e-06	-0.00801657	1.54125e-05	2.78414e-07	6.15581e-07	0.00908404	1.86579e-05	6.26103e-07		bcin_chr_9:2,484,600..2,489,053(+)		Fungal lipase-like domain;Alpha/Beta hydrolase fold	Fungal lipase-like domain		Alpha/Beta hydrolase fold				lipid metabolic process	3.1.1.3 (Triacylglycerol lipase)
920	Bcin09g07120	Spe	13	0.576732	0.00560243	0.110524	-0.000398082		2.05684e-06	0.0206531	0.000113646	6.0315e-06	-1.2078e-06	-0.00927767	2.2332e-05	6.27136e-07		bcin_chr_9:2,509,761..2,511,449(+)
921	Bcin10g00470	Vir	18	0.486573	0.00172109	0.318183	-0.000256154		-8.46496e-08	-0.000501383	1.11389e-05	8.16574e-08	2.93446e-07	0.00155386	1.28889e-05	2.7778e-07		bcin_chr_10:168,401..170,653(+)
922	Bcin10g00560	Vir	13	0.22915	-0.0102116	0.228323	-0.00225867		-6.67254e-07	-0.0060363	1.38e-05	1.94718e-07	1.8572e-07	0.00152299	1.15304e-05	1.54137e-07		bcin_chr_10:226,012..228,369(+)							integral component of membrane
923	Bcin10g00570	Vir	18	0.379824	-0.0132286	0.145243	0.0390802		-4.51605e-07	-0.00338543	1.11778e-05	1.27018e-07	1.26013e-06	0.0127162	1.90877e-05	6.04993e-07		bcin_chr_10:230,186..233,401(+)		Glucose-methanol-choline oxidoreductase, N-terminal;Glucose-methanol-choline oxidoreductase, C-terminal;Long-chain-alcohol oxidase;FAD/NAD(P)-binding domain superfamily	Glucose-methanol-choline oxidoreductase, N-terminal;Glucose-methanol-choline oxidoreductase, C-terminal		FAD/NAD(P)-binding domain superfamily		integral component of membrane	flavin adenine dinucleotide binding;long-chain-alcohol oxidase activity;oxidoreductase activity, acting on CH-OH group of donors	oxidation-reduction process	1.1.3.20 (Long-chain-alcohol oxidase)
924	Bcin10g00660	Vir	21	0.316915	0.00572843	0.126091	-0.0118066		7.0939e-08	-0.00021087	1.16857e-05	1.37214e-07	-3.11953e-07	0.00117369	2.30226e-05	9.27082e-07		bcin_chr_10:284,084..288,459(+)		Protein of unknown function DUF2841	Protein of unknown function DUF2841
925	Bcin10g00670	Spe	19	0.332871	0.00395583	0.100604	-0.00668351		3.28781e-07	0.00347203	2.14263e-05	6.34651e-07	-3.40521e-07	-0.00283332	1.35346e-05	3.35452e-07		bcin_chr_10:290,349..293,093(+)		Cytochrome P450;Cytochrome P450, E-class, group I;Cytochrome P450, conserved site;Cytochrome P450 superfamily	Cytochrome P450		Cytochrome P450 superfamily			heme binding;iron ion binding;monooxygenase activity;oxidoreductase activity, acting on paired donors, with incorporation or reduction of molecular oxygen	oxidation-reduction process;pathogenesis
926	Bcin10g00800	Vir	38	0.363223	-0.0115849	0.0438838	0.0187396		-6.61748e-07	-0.00466927	1.21105e-05	1.6609e-07	1.79156e-09	0.00232036	2.5169e-05	1.31382e-06		bcin_chr_10:343,727..344,970(-)							integral component of membrane
927	Bcin10g00920	Vir	17	0.2753	0.00365211	0.182727	-0.0127776		5.49235e-07	0.00389562	1.22765e-05	1.54341e-07	-8.11402e-07	-0.00893752	1.57585e-05	4.15067e-07		bcin_chr_10:378,782..380,940(+)	Bcbmt5	Domain of unknown function DUF2431	Domain of unknown function DUF2431							6.1.1.20 (Phenylalanine--tRNA ligase)
928	Bcin10g00930	Vir	14	0.429633	0.00339828	0.0376966	-0.0403042		1.95614e-07	0.00169431	1.05571e-05	1.25434e-07	-1.74424e-06	-0.017319	2.30977e-05	8.59655e-07		bcin_chr_10:380,903..382,856(-)	Bcaos1	Ubiquitin/SUMO-activating enzyme E1;THIF-type NAD/FAD binding fold;Ubiquitin-activating enzyme	THIF-type NAD/FAD binding fold		Ubiquitin-activating enzyme			ubiquitin-like modifier activating enzyme activity	cellular protein modification process	6.2.1.45 (E1 ubiquitin-activating enzyme)
929	Bcin10g00940	Vir	15	0.361913	0.00197198	0.212916	-0.00515638		2.12136e-07	0.00118773	1.30467e-05	1.34588e-07	9.54554e-08	0.00274145	4.2386e-05	3.28203e-06		bcin_chr_10:382,891..385,784(+)
930	Bcin10g00970	Vir	7	0.347371	-0.0214436	0.0189277	0.0203146		-1.18646e-06	-0.0117514	1.38429e-05	2.55122e-07	9.28842e-07	0.0168292	1.97444e-05	7.995e-07		bcin_chr_10:400,651..401,963(+)		GNAT domain;Acyl-CoA N-acyltransferase	GNAT domain		Acyl-CoA N-acyltransferase			N-acetyltransferase activity		2.3.-.- (Acyltransferases.)
931	Bcin10g01010	Vir	46	0.124827	-0.0251857	0.0228699	0.0636121		-1.07428e-06	-0.0134766	1.82891e-05	4.93883e-07	1.45122e-06	0.030813	5.09176e-05	3.19602e-06		bcin_chr_10:412,967..414,735(+)
932	Bcin10g01260	Vir	4	0.0158052	-0.039655	0.00797138	0.0641563		-2.16852e-06	-0.0218725	1.795e-05	4.28164e-07	2.73806e-06	0.0407401	3.87895e-05	2.00666e-06		bcin_chr_10:491,489..493,695(+)		Ribosomal protein L13, eukaryotic/archaeal;Ribosomal protein L13;Ribosomal protein L13, conserved site;Ribosomal protein L13 superfamily	Ribosomal protein L13		Ribosomal protein L13 superfamily	Ribosomal protein L13, eukaryotic/archaeal	large ribosomal subunit;ribosome	structural constituent of ribosome	translation
933	Bcin10g01280	Vir	43	0.386686	-0.00656463	0.108651	0.0186953		-3.88789e-07	-0.001379	1.36047e-05	2.31876e-07	6.58814e-07	0.00583041	1.4989e-05	3.81101e-07		bcin_chr_10:497,231..500,883(+)							integral component of membrane
934	Bcin10g01450	Vir	22	0.0693782	-0.0238005	0.0507868	0.0596047		-1.06916e-06	-0.00854608	1.71318e-05	3.91828e-07	1.25554e-06	0.0201955	3.09378e-05	1.57997e-06		bcin_chr_10:554,517..556,961(+)		Major facilitator superfamily;MFS transporter superfamily	Major facilitator superfamily		MFS transporter superfamily		integral component of membrane	transmembrane transporter activity	transmembrane transport	2.7.1.4 (Fructokinase)
935	Bcin10g01600	Vir	9	0.234993	-0.00619491	0.0455848	0.0378534		7.35542e-07	0.00412531	1.24222e-05	1.29825e-07	3.60923e-07	0.00667808	1.19181e-05	1.92513e-07		bcin_chr_10:607,610..613,031(+)		Hydantoinase A/oxoprolinase;Hydantoinaseoxoprolinase, N-terminal;Protein of unknown function DUF917;ATPase, nucleotide binding domain	Hydantoinase A/oxoprolinase;Hydantoinaseoxoprolinase, N-terminal;Protein of unknown function DUF917		ATPase, nucleotide binding domain			hydrolase activity		3.5.2.- (In cyclic amides.)
936	Bcin10g01660	Spe	8	0.053135	0.0228452	0.155611	-0.0462891		9.84427e-07	0.0146052	7.91375e-05	3.93036e-06	-1.21158e-06	-0.0178406	2.32763e-05	9.03955e-07		bcin_chr_10:632,370..634,384(-)		Glucose receptor Git3, N-terminal	Glucose receptor Git3, N-terminal				integral component of membrane
937	Bcin10g01670	Spe	23	0.0444728	0.0268419	0.0504598	-0.0289221		2.69352e-06	0.0218537	0.000157274	8.8487e-06	-1.85171e-06	-0.01737	3.28833e-05	1.30509e-06		bcin_chr_10:638,971..640,721(+)
938	Bcin10g01680	Spe	41	0.0879884	-0.00438344	0.0570991	0.00794659		-7.8808e-08	-0.000583891	2.92195e-05	9.70692e-07	1.01439e-07	0.00194077	1.6516e-05	4.45349e-07		bcin_chr_10:644,665..646,361(-)
939	Bcin10g01700	Vir	7	0.346636	-0.0205317	0.410305	0.0508087		-3.53341e-07	-0.00491606	1.12143e-05	9.82385e-08	5.33672e-07	0.00555971	1.21203e-05	1.77822e-07		bcin_chr_10:656,149..658,239(-)		SAP domain;SAP domain superfamily;THO1_MOS11, C-terminal domain	SAP domain;THO1_MOS11, C-terminal domain	SAP domain	SAP domain superfamily
940	Bcin10g01850	Vir	25	0.0714141	-0.0287741	0.0151434	0.0768373		-7.86784e-07	-0.0104522	1.4152e-05	2.92811e-07	1.37356e-06	0.0271926	3.41263e-05	1.71458e-06		bcin_chr_10:735,161..737,875(+)
941	Bcin10g01970	Vir	11	0.12188	-0.0266286	0.0166849	0.0875927		3.50075e-07	0.000323307	1.24727e-05	2.26159e-07	4.19268e-07	0.0116429	2.37512e-05	1.08756e-06		bcin_chr_10:772,628..773,695(-)
942	Bcin10g02060	Vir	39	0.37923	0.00576544	0.259007	-0.0143689		1.15607e-07	-0.000621628	1.12744e-05	1.3682e-07	-1.10042e-07	-0.000295306	1.25776e-05	1.46638e-07		bcin_chr_10:796,865..798,555(+)		Oxidoreductase, N-terminal;Oxidoreductase, C-terminal;NAD(P)-binding domain superfamily	Oxidoreductase, N-terminal;Oxidoreductase, C-terminal		NAD(P)-binding domain superfamily			oxidoreductase activity	oxidation-reduction process	1.-.-.- (Oxidoreductases.)
943	Bcin10g02130	Spe	10	0.22327	0.0131707	0.0818745	-0.0021448		9.5786e-07	0.00963587	3.589e-05	1.3617e-06	-1.61511e-07	-0.00172623	1.44526e-05	3.23153e-07		bcin_chr_10:817,136..820,241(-)	Bcarp8	Actin family;Actin-related protein 8/Plant actin-related protein 9;ATPase, nucleotide binding domain	Actin family	Actin family	ATPase, nucleotide binding domain		Ino80 complex	ATP binding	chromatin remodeling
944	Bcin10g02140	Spe	11	0.50011	0.00614791	0.044102	-0.0205264		2.86207e-07	0.00194373	3.06818e-05	1.0988e-06	-4.79856e-07	-0.00269585	1.40191e-05	2.61934e-07		bcin_chr_10:824,025..829,119(+)		ABC transporter-like;AAA+ ATPase domain;ABC transporter type 1, transmembrane domain;ABC transporter, conserved site;P-loop containing nucleoside triphosphate hydrolase;ABC transporter type 1, transmembrane domain superfamily;Type I protein exporter	ABC transporter-like;ABC transporter type 1, transmembrane domain	AAA+ ATPase domain	P-loop containing nucleoside triphosphate hydrolase;ABC transporter type 1, transmembrane domain superfamily		integral component of membrane	ATP binding;ATPase activity;ATPase-coupled transmembrane transporter activity	transmembrane transport	3.6.3.44 (Transferred entry: 7.6.2.2)
945	Bcin10g02190	Vir	4	0.418982	-0.000635652	0.113072	-0.0166741		-3.13966e-07	-0.000109768	1.5075e-05	2.8945e-07	-2.37966e-07	-0.00501803	1.69474e-05	5.12995e-07		bcin_chr_10:844,700..847,610(+)
946	Bcin10g02200	Vir	4	0.0499451	-0.0075187	0.000281958	0.0160246		3.79404e-07	-0.00191549	1.54e-05	3.9559e-07	-4.79403e-07	0.000759461	2.1e-05	7.74222e-07		bcin_chr_10:848,291..853,636(+)
947	Bcin10g02210	Spe	9	0.0542213	-0.0187655	0.289727	0.0276708		-1.81701e-06	-0.0124802	4.29778e-05	1.73084e-06	1.21167e-06	0.00753388	1.57544e-05	3.82639e-07		bcin_chr_10:855,078..858,300(-)		Chromo/chromo shadow domain;Chromo-like domain superfamily;Chromo domain, conserved site;Chromo domain	Chromo domain	Chromo/chromo shadow domain	Chromo-like domain superfamily
948	Bcin10g02220	Spe	6	0.172709	0.0130606	0.0886516	-0.0179176		7.85012e-07	0.010878	3.54333e-05	1.45987e-06	-6.68208e-07	-0.00491894	1.57895e-05	3.94227e-07		bcin_chr_10:861,479..864,426(-)		Patatin-like phospholipase domain;Acyl transferase/acyl hydrolase/lysophospholipase;Triacylglycerol lipase	Patatin-like phospholipase domain;Triacylglycerol lipase		Acyl transferase/acyl hydrolase/lysophospholipase		integral component of membrane	triglyceride lipase activity	lipid catabolic process;lipid metabolic process	3.1.1.- (Carboxylic ester hydrolases.)
949	Bcin10g02310	Vir	9	0.0404411	-0.0367129	0.000110909	0.0963929		-1.38372e-06	-0.0125479	1.77444e-05	4.13089e-07	1.87537e-06	0.025919	1.94503e-05	7.26261e-07		bcin_chr_10:894,850..897,613(+)		Transcription factor Nrm1/Whi5	Transcription factor Nrm1/Whi5				cytoplasm;nucleus
950	Bcin10g02360	Vir	7	0.0460973	-0.0351872	7.97993e-05	0.093318		-2.31956e-06	-0.0220506	2.85857e-05	1.09824e-06	2.66209e-06	0.0342101	2.3985e-05	9.61957e-07		bcin_chr_10:907,010..909,207(+)		EF-hand domain;EF-hand domain pair;EF-Hand 1, calcium-binding site		EF-hand domain	EF-hand domain pair			calcium ion binding
951	Bcin10g02450	Vir	10	0.0331875	-0.0389913	0.00117227	0.0867141		-2.13454e-06	-0.0150509	1.651e-05	3.6653e-07	3.00004e-06	0.0360098	3.92842e-05	1.82563e-06		bcin_chr_10:941,427..943,666(-)	Bcxks1	Carbohydrate kinase, FGGY, N-terminal;Carbohydrate kinase, FGGY, C-terminal;D-xylulose kinase;ATPase, nucleotide binding domain	Carbohydrate kinase, FGGY, N-terminal;Carbohydrate kinase, FGGY, C-terminal		ATPase, nucleotide binding domain			ATP binding;phosphotransferase activity, alcohol group as acceptor;xylulokinase activity	D-xylose metabolic process;carbohydrate metabolic process	2.7.1.17 (Xylulokinase)
952	Bcin10g02650	Spe	9	0.0133394	-0.0198584	0.0132556	0.040956		-5.06088e-07	0.000189604	7.33e-05	4.17865e-06	1.02958e-06	0.00890209	1.75673e-05	4.8672e-07		bcin_chr_10:1,006,846..1,008,911(-)		Glycoside hydrolase family 1;Glycoside hydrolase superfamily;Glycosyl hydrolases family 1, N-terminal conserved site	Glycoside hydrolase family 1		Glycoside hydrolase superfamily			hydrolase activity, hydrolyzing O-glycosyl compounds	carbohydrate metabolic process	3.2.1.21 (Beta-glucosidase)
953	Bcin10g02670	Vir	5	0.150493	-0.0301916	0.243827	0.0502319		-1.66386e-06	-0.0138781	1.556e-05	2.48586e-07	2.97455e-06	0.0364388	4.55789e-05	3.37042e-06		bcin_chr_10:1,010,372..1,011,846(-)
954	Bcin10g02710	Vir	14	0.341994	0.0103364	0.169561	-0.023685		-1.21314e-07	0.00111438	3.51071e-05	1.25955e-06	4.64941e-08	-0.000122526	2.1782e-05	7.76427e-07		bcin_chr_10:1,020,635..1,023,983(+)							integral component of membrane
955	Bcin10g02730	Spe	23	0.449501	0.0150443	0.0615169	-0.0203105		9.87902e-07	0.00996269	2.99783e-05	9.83794e-07	-5.71871e-07	-0.00504836	1.27002e-05	2.0613e-07		bcin_chr_10:1,028,332..1,030,019(+)
956	Bcin10g02740	Spe	19	0.522825	0.0118374	0.0887236	-0.0450428		-8.44592e-08	0.00420315	5.31e-05	2.65815e-06	-5.78617e-07	-0.00507187	1.10305e-05	1.54238e-07		bcin_chr_10:1,030,474..1,031,591(+)
957	Bcin10g02750	Spe	16	0.336888	0.00918347	0.0741944	-0.0242344		2.31221e-07	0.00140232	3.85562e-05	1.50885e-06	-4.84819e-07	-0.00478858	1.93092e-05	5.74321e-07		bcin_chr_10:1,032,532..1,033,567(+)
958	Bcin10g02760	Spe	25	0.293047	0.0231028	0.116776	-0.0315798		1.33992e-06	0.0138911	6.4704e-05	2.869e-06	-7.28601e-07	-0.00666454	1.92168e-05	6.08603e-07		bcin_chr_10:1,036,050..1,037,426(+)
959	Bcin10g02770	Spe	30	0.277514	0.0118293	0.270921	-0.00157645		1.0739e-06	0.0111975	3.58133e-05	1.32239e-06	-2.04063e-07	-0.00245839	1.67614e-05	4.45665e-07		bcin_chr_10:1,038,016..1,040,063(+)
960	Bcin10g02780	Spe	32	0.132391	0.0200407	0.208911	-0.0297246		1.12313e-06	0.0137736	8.11875e-05	3.78623e-06	-8.80729e-07	-0.00890955	2.4477e-05	8.54947e-07		bcin_chr_10:1,040,321..1,042,576(+)
961	Bcin10g02790	Spe	40	0.17015	0.0230251	0.0709794	-0.0366901		1.42622e-06	0.01672	0.000128982	7.16564e-06	-8.73459e-07	-0.00624	1.625e-05	4.12875e-07		bcin_chr_10:1,042,754..1,045,003(+)
962	Bcin10g02800	Spe	33	0.221809	0.00828851	0.0630712	-0.0133853		3.32641e-07	0.00370257	7.97667e-05	4.08193e-06	-1.92352e-08	6.68152e-05	1.64817e-05	4.33652e-07		bcin_chr_10:1,045,453..1,047,268(+)
963	Bcin10g02980	Spe	3	0.0135368	-0.0434769	0.00128167	0.0822808		-1.49447e-06	-0.0111357	1.43667e-05	1.95803e-07	4.28301e-07	0.00152396	1.23509e-05	6.51468e-08		bcin_chr_10:1,105,743..1,109,752(-)
964	Bcin10g03030	Spe	7	0.0461528	-0.0124931	0.111992	0.035598		3.67585e-07	0.00289568	4.46571e-05	2.01766e-06	-1.90684e-08	0.000870278	1.48722e-05	2.84278e-07		bcin_chr_10:1,123,913..1,125,624(+)
965	Bcin10g03040	Spe	10	0.0464776	-0.00839222	0.176022	0.0127155		-3.2072e-07	0.000206765	5.011e-05	2.22055e-06	-1.89263e-08	0.0020638	1.28211e-05	2.84148e-07		bcin_chr_10:1,125,855..1,127,547(+)		Capsular polysaccharide synthesis protein;Nucleotide-diphospho-sugar transferases	Capsular polysaccharide synthesis protein		Nucleotide-diphospho-sugar transferases
966	Bcin10g03080	Vir	5	0.0645852	-0.0377761	0.33695	0.0519847		-1.24532e-06	-0.00992018	1.11e-05	1.77512e-07	3.72171e-07	0.00421692	9.22105e-06	1.35141e-07		bcin_chr_10:1,174,763..1,175,919(-)
967	Bcin10g03110	Spe	12	0.177893	-0.0235841	0.313284	0.0468034		-1.40765e-06	-0.0133571	2.44167e-05	7.96414e-07	1.04314e-06	0.0142886	1.43421e-05	3.00089e-07		bcin_chr_10:1,186,152..1,188,413(-)		RNA recognition motif domain;RNA-binding domain superfamily		RNA recognition motif domain	RNA-binding domain superfamily			RNA binding;nucleic acid binding
968	Bcin10g03160	Vir	5	0.0173134	-0.0445424	1.23071e-05	0.113703		-6.03672e-07	-0.00581281	1.208e-05	1.5033e-07	1.54144e-06	0.0268674	1.93263e-05	6.68112e-07		bcin_chr_10:1,200,996..1,204,399(-)
969	Bcin10g03260	Vir	5	0.00949471	-0.0458698	0.000236729	0.0973407		-1.6507e-06	-0.0107145	1.374e-05	2.37947e-07	1.42159e-06	0.0149145	1.13053e-05	2.66816e-07		bcin_chr_10:1,240,138..1,242,064(+)	Bchut1	UAA transporter	UAA transporter				integral component of membrane		carbohydrate transport;transmembrane transport	1.9.3.1 (Transferred entry: 7.1.1.9)
970	Bcin10g03530	Spe	1	0.994878	-0.000126716	0.000986407	0.0889966		2.38418e-06	0.0174829	2.15e-05	5.00984e-07	2.76147e-07	0.00665396	2.46316e-05	1.43995e-07		bcin_chr_10:1,351,858..1,355,370(+)		Zn(2)-C6 fungal-type DNA-binding domain;Fungal transcription factor;Zn(2)-C6 fungal-type DNA-binding domain superfamily	Zn(2)-C6 fungal-type DNA-binding domain;Fungal transcription factor	Zn(2)-C6 fungal-type DNA-binding domain	Zn(2)-C6 fungal-type DNA-binding domain superfamily		host cell nucleus;nucleus	DNA-binding transcription factor activity, RNA polymerase II-specific;zinc ion binding	regulation of transcription, DNA-templated
971	Bcin10g03540	Spe	8	0.31599	0.0124226	0.125278	0.00787538		2.81172e-06	0.034011	5.835e-05	3.01157e-06	-5.43138e-07	-0.00785396	1.12368e-05	1.56471e-07		bcin_chr_10:1,355,593..1,357,400(+)		Peptidase C12, ubiquitin carboxyl-terminal hydrolase;Ubiquitinyl hydrolase, UCH37 type;Papain-like cysteine peptidase superfamily;Peptidase C12, C-terminal domain	Peptidase C12, ubiquitin carboxyl-terminal hydrolase;Peptidase C12, C-terminal domain		Papain-like cysteine peptidase superfamily			thiol-dependent ubiquitin-specific protease activity	protein deubiquitination;ubiquitin-dependent protein catabolic process	3.4.19.12 (Ubiquitinyl hydrolase 1)
972	Bcin10g03550	Vir	9	0.436489	0.00790464	0.23236	-0.00921519		1.96437e-06	0.0221927	2.81444e-05	1.06085e-06	-1.14532e-06	-0.0135575	2.26316e-05	8.88915e-07		bcin_chr_10:1,357,414..1,359,697(-)		Protein of unknown function DUF2985	Protein of unknown function DUF2985				integral component of membrane
973	Bcin10g03570	Spe	1	0.00496667	0.0496793	0.00570596	-0.068963		4.47732e-06	0.0567155	0.0001043	6.07512e-06	-1.43376e-06	-0.00835427	1.26316e-05	2.15162e-07		bcin_chr_10:1,363,482..1,363,934(-)
974	Bcin10g03650	Spe	11	0.180279	-0.0138296	0.132345	0.0201997		-1.33446e-06	-0.00752855	2.44273e-05	5.92326e-07	8.55056e-07	0.00702446	1.09378e-05	1.58144e-07		bcin_chr_10:1,390,849..1,394,249(+)		FAD-binding 8;Ferric reductase, NAD binding domain;Ferric reductase transmembrane component-like domain;Riboflavin synthase-like beta-barrel;Ferredoxin-NADP reductase (FNR), nucleotide-binding domain	Ferric reductase transmembrane component-like domain;FAD-binding 8;Ferric reductase, NAD binding domain		Ferredoxin-NADP reductase (FNR), nucleotide-binding domain;Riboflavin synthase-like beta-barrel		integral component of membrane	oxidoreductase activity	ion transport;oxidation-reduction process	1.16.1.9 (Ferric-chelate reductase (NADPH))
975	Bcin10g03670	Spe	4	0.43237	-0.0131212	0.107401	0.0180239		-1.39063e-06	-0.0100168	2.1725e-05	4.79265e-07	3.39628e-07	0.00259617	1.35e-05	1.00169e-07		bcin_chr_10:1,396,003..1,397,623(-)		tRNA-splicing endonuclease subunit Sen15;tRNA intron endonuclease, catalytic domain-like superfamily;tRNA-splicing endonuclease subunit Sen15, fungi	tRNA-splicing endonuclease subunit Sen15		tRNA intron endonuclease, catalytic domain-like superfamily		tRNA-intron endonuclease complex		tRNA splicing, via endonucleolytic cleavage and ligation;tRNA-type intron splice site recognition and cleavage
976	Bcin10g03740	Spe	14	0.316942	0.0192134	0.030895	0.0471628		4.6892e-06	0.0437678	0.000124507	6.52143e-06	-2.89383e-07	-0.00187958	1.12105e-05	1.41714e-07		bcin_chr_10:1,419,352..1,421,186(+)							integral component of membrane
977	Bcin10g03750	Spe	6	0.399283	0.011438	0.0258528	0.0617218		4.04987e-06	0.0390359	9.69167e-05	4.98955e-06	7.96716e-08	0.00395053	1.03333e-05	1.18456e-07		bcin_chr_10:1,421,206..1,422,838(-)		mRNA-decapping enzyme subunit 1	mRNA-decapping enzyme subunit 1				cytoplasm	enzyme activator activity	deadenylation-dependent decapping of nuclear-transcribed mRNA;positive regulation of catalytic activity	3.-.-.- (Hydrolases.)
978	Bcin10g03760	Spe	15	0.324408	0.0136148	0.0350669	0.0537072		3.84377e-06	0.0335668	6.48467e-05	2.94973e-06	1.03704e-07	0.00245742	9.30526e-06	9.99252e-08		bcin_chr_10:1,422,908..1,426,756(+)	Bcinp51	Inositol polyphosphate-related phosphatase;Endonuclease/exonuclease/phosphatase superfamily		Inositol polyphosphate-related phosphatase	Endonuclease/exonuclease/phosphatase superfamily			hydrolase activity	phosphatidylinositol dephosphorylation	3.1.3.56 (Inositol-polyphosphate 5-phosphatase)
979	Bcin10g03770	Spe	3	0.269054	-0.0118551	0.17371	0.048063		9.60731e-07	0.0116361	6.73e-05	3.3672e-06	5.06927e-07	0.00893829	1.01404e-05	2.39732e-07		bcin_chr_10:1,426,761..1,429,009(-)		Histidine phosphatase superfamily, clade-2;Histidine acid phosphatase, eukaryotic;Histidine phosphatase superfamily	Histidine phosphatase superfamily, clade-2		Histidine phosphatase superfamily			phosphatase activity		3.1.3.8 (3-phytase)
980	Bcin10g03790	Spe	8	0.276285	-0.024755	0.108401	0.0182216		-2.04799e-06	-0.0137842	1.5925e-05	3.10924e-07	-5.0301e-08	0.00149581	1.06579e-05	9.79758e-08		bcin_chr_10:1,436,698..1,438,074(+)							integral component of membrane
981	Bcin10g04170	SpeVir	22	0.205031	0.0220092	0.208856	-0.0376801		1.29306e-06	0.0132729	3.11636e-05	1.08046e-06	-1.06876e-06	-0.014425	3.77225e-05	1.80633e-06		bcin_chr_10:1,606,588..1,607,590(-)
982	Bcin10g04180	Vir	26	0.270193	-0.0268033	0.249519	0.0404503		-1.69331e-06	-0.01263	1.59846e-05	3.2278e-07	1.47315e-06	0.0152321	1.52915e-05	3.4572e-07		bcin_chr_10:1,607,542..1,609,267(-)
983	Bcin10g04190	Vir	15	0.11129	-0.0209352	0.0364774	0.0497797		-1.08281e-06	-0.0126351	1.732e-05	4.20759e-07	1.26584e-06	0.0167048	2.34456e-05	9.52173e-07		bcin_chr_10:1,610,442..1,613,249(+)		Galactose oxidase/kelch, beta-propeller;Immunoglobulin E-set;Galactose oxidase-like, Early set domain	Galactose oxidase-like, Early set domain		Galactose oxidase/kelch, beta-propeller;Immunoglobulin E-set					1.2.3.1 (Aldehyde oxidase)
984	Bcin10g04200	Vir	35	0.268213	0.00953504	0.303488	-0.0203124		4.85475e-07	0.00408649	2.15571e-05	5.73157e-07	-7.35109e-07	-0.0106031	8.80962e-05	5.96595e-06		bcin_chr_10:1,613,556..1,616,280(+)		Cytochrome P450;Cytochrome P450 superfamily	Cytochrome P450		Cytochrome P450 superfamily			heme binding;iron ion binding;oxidoreductase activity, acting on paired donors, with incorporation or reduction of molecular oxygen	oxidation-reduction process;pathogenesis	1.14.-.- (Acting on paired donors, with incorporation or reduction of molecular oxygen. The oxygen incorporated need not be derived from O(2).)
985	Bcin10g04210	Vir	21	0.11558	-0.00747381	0.0972796	0.0152919		1.46966e-07	-0.000719905	1.44333e-05	3.91648e-07	8.62206e-08	0.00209428	1.6396e-05	5.02674e-07		bcin_chr_10:1,616,347..1,619,541(-)
986	Bcin10g04220	Vir	34	0.446865	0.00549762	0.157756	0.007002		9.00807e-07	0.00530755	1.16588e-05	1.49277e-07	-7.24359e-08	-0.00145695	1.0031e-05	1.33077e-07		bcin_chr_10:1,621,557..1,623,059(-)	Bctma19	Mss4-like superfamily;Translationally controlled tumour protein, conserved site;Translationally controlled tumour protein	Translationally controlled tumour protein		Mss4-like superfamily				translation
987	Bcin10g04230	Vir	17	0.433973	-0.0115493	0.560227	0.00177959		-1.41155e-06	-0.00988664	1.24647e-05	1.9767e-07	1.17756e-06	0.0107345	1.41176e-05	2.84841e-07		bcin_chr_10:1,623,850..1,626,442(+)		Fatty acid hydroxylase	Fatty acid hydroxylase				integral component of membrane	iron ion binding;oxidoreductase activity	lipid biosynthetic process;oxidation-reduction process	1.14.18.5 (Sphingolipid C4-monooxygenase)
988	Bcin10g04330	Spe	13	0.172729	-0.00129263	0.0978141	0.00427119		-2.41094e-07	-0.00384385	2.04769e-05	5.42514e-07	2.35282e-07	0.000927376	1.55304e-05	4.23974e-07		bcin_chr_10:1,662,856..1,665,802(+)		Peptidase S10, serine carboxypeptidase;Alpha/Beta hydrolase fold	Peptidase S10, serine carboxypeptidase		Alpha/Beta hydrolase fold			serine-type carboxypeptidase activity	proteolysis	3.4.16.- (Serine-type carboxypeptidases.)
989	Bcin10g04340	Vir	24	0.350109	-0.00283091	0.112701	-0.00308632		-3.20451e-07	-0.00218503	1.29042e-05	1.92281e-07	-2.03622e-07	-0.00253398	1.66491e-05	4.6031e-07		bcin_chr_10:1,667,382..1,671,667(+)		Cas1p 10 TM acyl transferase domain	Cas1p 10 TM acyl transferase domain				integral component of membrane	transferase activity		2.3.1.- (Transferring groups other than amino-acyl groups.)
990	Bcin10g04360	SpeVir	29	0.285477	0.00242061	0.137111	-0.00438171		3.58268e-07	0.00446763	2.43517e-05	8.482e-07	-4.04977e-07	-2.52598e-05	1.91906e-05	5.50317e-07		bcin_chr_10:1,674,978..1,677,554(+)		Six-hairpin glycosidase superfamily;Beta-L-arabinofuranosidase, GH127	Beta-L-arabinofuranosidase, GH127		Six-hairpin glycosidase superfamily			catalytic activity
991	Bcin10g04380	Vir	13	0.197135	0.00423269	0.193955	-0.00765265		1.75748e-07	0.00198142	1.46308e-05	2.95886e-07	-5.4394e-07	-0.00485714	2.68988e-05	1.03625e-06		bcin_chr_10:1,682,248..1,684,730(-)
992	Bcin10g04390	Vir	14	0.202324	0.00468182	0.0900215	-0.00120399		7.55112e-07	0.00542685	2.57714e-05	7.827e-07	-7.83262e-07	-0.00382725	3.19398e-05	1.2961e-06		bcin_chr_10:1,684,843..1,687,246(-)		Nuclear cap-binding protein subunit 3	Nuclear cap-binding protein subunit 3					RNA 7-methylguanosine cap binding;mRNA binding
993	Bcin10g04520	Vir	40	0.57149	0.000275505	0.623601	-0.00582647		-1.4844e-09	-9.26717e-05	1.1775e-05	1.5167e-07	-8.73101e-08	-0.000813665	1.13947e-05	1.44249e-07		bcin_chr_10:1,734,263..1,735,541(+)
994	Bcin10g04640	SpeVir	16	0.391684	-0.00241479	0.226155	-0.000407519		-4.82756e-07	-0.00357844	1.685e-05	4.13604e-07	1.75085e-07	0.00251841	1.98947e-05	5.86333e-07		bcin_chr_10:1,789,699..1,793,640(+)
995	Bcin10g04670	Vir	4	0.620194	-0.00489216	0.554392	0.0287793		-1.09504e-06	-0.00463034	1.015e-05	7.93363e-08	3.36633e-06	0.0272544	2.93947e-05	1.11412e-06		bcin_chr_10:1,802,168..1,803,370(-)		NADH dehydrogenase [ubiquinone] 1 beta subcomplex subunit 3	NADH dehydrogenase [ubiquinone] 1 beta subcomplex subunit 3				integral component of membrane;mitochondrial inner membrane;mitochondrion;respirasome		electron transport chain	1.6.-.- (Acting on NADH or NADPH.)
996	Bcin10g04680	Vir	7	0.70258	0.00772339	0.585136	-0.0276963		7.25593e-07	0.00377382	1.24857e-05	1.77518e-07	-1.67606e-06	-0.0198163	4.97444e-05	2.64254e-06		bcin_chr_10:1,803,452..1,805,556(+)	Bcpop2	Ribonuclease CAF1;Ribonuclease H-like superfamily	Ribonuclease CAF1		Ribonuclease H-like superfamily		CCR4-NOT complex	nucleic acid binding;poly(A)-specific ribonuclease activity		3.1.13.4 (Poly(A)-specific ribonuclease)
997	Bcin10g04730	Vir	28	0.0428169	-0.0384795	0.108395	0.0733518		-1.68514e-06	-0.0129314	1.49143e-05	3.03221e-07	1.93368e-06	0.0250788	2.62218e-05	1.10523e-06		bcin_chr_10:1,813,210..1,814,667(+)
998	Bcin10g04750	SpeVir	53	0.288823	-0.00199388	0.502744	-0.0118467		-7.42886e-07	-0.00220851	2.88868e-05	9.72377e-07	1.66638e-07	-0.00145705	2.85839e-05	1.27183e-06		bcin_chr_10:1,818,761..1,820,302(+)
999	Bcin10g04760	Spe	18	0.0252068	-0.0360459	6.81253e-05	0.0890274		-9.26637e-07	-0.00850075	1.79444e-05	3.79827e-07	1.25922e-06	0.0122851	1.77778e-05	5.01845e-07		bcin_chr_10:1,821,975..1,823,358(+)
1000	Bcin10g04790	Vir	29	0.289379	-0.00677413	0.332814	0.0160231		-1.65319e-07	0.00143746	2.05138e-05	5.79508e-07	3.20753e-07	0.000396129	4.18004e-05	2.16866e-06		bcin_chr_10:1,828,533..1,830,855(+)
1001	Bcin10g04840	Vir	82	0.288701	0.00583219	0.228999	-0.0084528		2.98466e-07	0.00108093	1.27963e-05	2.0004e-07	-9.50351e-08	0.000340638	1.96521e-05	6.83305e-07		bcin_chr_10:1,844,575..1,847,879(+)
1002	Bcin10g04860	Vir	16	0.327551	-0.00958123	0.106761	0.000972163		-4.36779e-07	-0.00235986	1.16875e-05	1.61703e-07	3.7055e-07	0.00516671	1.37434e-05	3.05401e-07		bcin_chr_10:1,849,355..1,851,782(-)										3.2.1.4 (Cellulase)
1003	Bcin10g04880	Vir	3	0.0782045	-0.0197594	0.00212334	0.0305874		-1.18004e-06	-0.012235	1.69333e-05	3.558e-07	7.37265e-07	0.0101371	1.67368e-05	4.93377e-07		bcin_chr_10:1,859,379..1,861,923(-)		Calcineurin-like phosphoesterase domain, ApaH type	Calcineurin-like phosphoesterase domain, ApaH type				integral component of membrane	hydrolase activity		3.1.-.- (Acting on ester bonds.)
1004	Bcin10g05070	Vir	24	0.300797	-0.00430564	0.0957914	0.0233445		-6.7955e-10	-0.00135544	1.42083e-05	2.54501e-07	3.98018e-07	0.00971834	2.47719e-05	1.13644e-06		bcin_chr_10:1,916,531..1,917,419(+)							integral component of membrane
1005	Bcin10g05080	Vir	27	0.313844	-0.0174918	0.0707617	0.077127		2.73298e-07	0.00227197	1.10778e-05	1.05743e-07	1.49659e-06	0.0176102	5.96725e-05	4.61821e-06		bcin_chr_10:1,917,478..1,921,484(-)
1006	Bcin10g05110	Vir	12	0.507468	0.00351955	0.220043	0.00206855		1.92714e-06	0.0104784	1.3475e-05	2.4633e-07	-1.7116e-06	-0.0117562	1.72018e-05	4.4593e-07		bcin_chr_10:1,935,954..1,938,694(+)		Major facilitator superfamily;MFS transporter superfamily	Major facilitator superfamily		MFS transporter superfamily		integral component of membrane	transmembrane transporter activity	transmembrane transport
1007	Bcin10g05120	Vir	26	0.243131	0.019423	0.145352	-0.0366281		1.55572e-06	0.0094784	1.60154e-05	3.18786e-07	-1.31572e-06	-0.0107468	2.07368e-05	6.33715e-07		bcin_chr_10:1,939,134..1,941,427(+)		FAD-binding domain;FAD/NAD(P)-binding domain superfamily	FAD-binding domain		FAD/NAD(P)-binding domain superfamily			FAD binding
1008	Bcin10g05160	Vir	13	0.242825	-0.0173904	0.197522	0.0458932		-2.83614e-07	-0.00299797	1.34692e-05	1.84429e-07	8.08769e-07	0.0150522	1.89312e-05	5.33832e-07		bcin_chr_10:1,951,780..1,953,290(-)
1009	Bcin10g05260	Vir	12	0.389798	-0.0125564	0.188747	0.0348539		-3.0194e-07	-0.00287207	1.23417e-05	1.88348e-07	3.46904e-07	0.00301738	1.03684e-05	1.33628e-07		bcin_chr_10:1,991,804..1,995,494(-)		Zn(2)-C6 fungal-type DNA-binding domain;Zn(2)-C6 fungal-type DNA-binding domain superfamily	Zn(2)-C6 fungal-type DNA-binding domain	Zn(2)-C6 fungal-type DNA-binding domain	Zn(2)-C6 fungal-type DNA-binding domain superfamily		host cell nucleus;nucleus	DNA-binding transcription factor activity, RNA polymerase II-specific;zinc ion binding	regulation of transcription, DNA-templated
1010	Bcin10g05370	Vir	6	0.261297	-0.0156861	0.14779	0.0313064		-1.26569e-06	-0.0119658	1.575e-05	3.36596e-07	6.40972e-07	0.0157125	3.12105e-05	2.11048e-06		bcin_chr_10:2,034,578..2,037,939(+)		Aminotransferase class-III;Pyridoxal phosphate-dependent transferase	Aminotransferase class-III		Pyridoxal phosphate-dependent transferase			catalytic activity;pyridoxal phosphate binding;transaminase activity		2.6.1.62 (Adenosylmethionine--8-amino-7-oxononanoate transaminase)
1011	Bcin10g05490	Vir	18	0.244467	0.00121902	0.107179	0.00143357		8.32994e-08	-0.00154773	1.33056e-05	1.99325e-07	1.4401e-08	0.00770853	2.31579e-05	1.18057e-06		bcin_chr_10:2,067,695..2,070,483(-)	Bcku80	Ku70/Ku80, N-terminal alpha/beta;Ku70/Ku80 beta-barrel domain;Ku, C-terminal;SPOC-like, C-terminal domain superfamily;Ku80;von Willebrand factor A-like domain superfamily;Ku, C-terminal domain superfamily	Ku70/Ku80 beta-barrel domain;Ku70/Ku80, N-terminal alpha/beta;Ku, C-terminal	Ku70/Ku80 beta-barrel domain	SPOC-like, C-terminal domain superfamily;Ku, C-terminal domain superfamily;von Willebrand factor A-like domain superfamily		Ku70:Ku80 complex;chromosome, telomeric region;nucleus	ATP binding;DNA binding;DNA helicase activity;damaged DNA binding;hydrolase activity, acting on acid anhydrides;telomeric DNA binding	DNA recombination;double-strand break repair via nonhomologous end joining;telomere maintenance	3.6.4.12 (DNA helicase)
1012	Bcin10g05580	Vir	4	0.0269045	0.0359569	0.107469	-0.0371963		1.7208e-06	0.013732	1.825e-05	2.85663e-07	-4.4267e-07	-0.00264514	9.52632e-06	9.51787e-08		bcin_chr_10:2,112,339..2,114,095(+)
1013	Bcin10g05600	Vir	20	0.437973	0.000796801	0.236227	-0.00154202		-3.03703e-08	-0.000299409	1.3225e-05	2.03331e-07	3.71407e-07	0.000203026	2.22421e-05	7.89413e-07		bcin_chr_10:2,122,140..2,123,878(-)
1014	Bcin10g05690	Vir	8	0.25607	-0.00506191	0.113461	0.0185588		-3.69899e-07	-0.00464367	1.95625e-05	4.71659e-07	6.86033e-07	0.0113563	3.31842e-05	1.73652e-06		bcin_chr_10:2,165,163..2,169,403(-)
1015	Bcin10g05900	Vir	8	0.476167	-0.00539363	0.0884926	0.0547861		1.07438e-06	0.00819808	1.15875e-05	1.99964e-07	6.83743e-07	0.00995571	2.02895e-05	7.75992e-07		bcin_chr_10:2,264,455..2,267,719(-)		Forkhead-associated (FHA) domain;Fork head domain;SMAD/FHA domain superfamily;Fork head domain conserved site 2;Winged helix DNA-binding domain superfamily	Fork head domain;Forkhead-associated (FHA) domain	Forkhead-associated (FHA) domain;Fork head domain	Winged helix DNA-binding domain superfamily;SMAD/FHA domain superfamily		nucleus	DNA-binding transcription factor activity;protein binding;sequence-specific DNA binding	regulation of transcription, DNA-templated
1016	Bcin10g05910	Vir	7	0.561624	-0.00204056	0.0629232	-0.00019091		-4.49813e-07	-0.00348618	1.43429e-05	2.17266e-07	-6.23398e-08	-0.00154316	9.96992e-06	1.19792e-07		bcin_chr_10:2,272,327..2,276,378(-)
1017	Bcin11g00220	Vir	5	0.00620986	-0.0484938	1.53465e-05	0.103958		-1.69832e-06	-0.0156139	1.734e-05	2.96374e-07	1.84734e-06	0.0232966	1.99158e-05	5.60108e-07		bcin_chr_11:81,928..84,162(-)		Modifier of rudimentary, Modr;ESCRT assembly domain;Vacuolar protein sorting-associated protein 37	Modifier of rudimentary, Modr		ESCRT assembly domain		ESCRT I complex		endosome transport via multivesicular body sorting pathway;protein transport
1018	Bcin11g00320	Vir	13	0.214295	-0.0201877	0.0134611	0.0465137		-5.50211e-07	-0.00356935	1.10615e-05	1.34738e-07	9.67355e-07	0.0129844	1.39757e-05	3.42358e-07		bcin_chr_11:111,954..115,224(-)							integral component of membrane
1019	Bcin11g00360	Vir	5	0.420902	-0.00980788	0.0100551	0.0463805		-4.26362e-07	-0.0042429	1.398e-05	1.97682e-07	1.50933e-06	0.0212979	2.18316e-05	8.04436e-07		bcin_chr_11:126,154..128,919(+)	Bcndc80	Kinetochore protein Ndc80	Kinetochore protein Ndc80				Ndc80 complex;condensed chromosome kinetochore		attachment of mitotic spindle microtubules to kinetochore;cell division
1020	Bcin11g00620	Spe	7	0.107585	0.00351778	0.173139	0.00953735		1.34321e-06	0.0121933	3.49857e-05	1.43384e-06	-1.15763e-06	-0.00882721	1.35639e-05	2.26581e-07		bcin_chr_11:197,292..199,341(+)		Uncharacterized protein YOR389W-like					integral component of membrane
1021	Bcin11g01080	Vir	48	0.175245	0.0265768	0.117532	-0.0392534		2.17791e-06	0.0162056	2.18354e-05	5.56054e-07	-1.35044e-06	-0.0103991	1.50899e-05	2.7817e-07		bcin_chr_11:383,618..386,913(-)
1022	Bcin11g01170	Vir	13	0.483112	0.00678834	0.341903	-0.00554949		3.42311e-07	0.00334669	1.45077e-05	2.22221e-07	2.83132e-07	-9.17492e-05	2.05668e-05	6.81835e-07		bcin_chr_11:414,076..414,522(-)
1023	Bcin11g01260	Vir	21	0.222646	-0.0153743	0.234035	0.0427821		-3.36993e-07	-0.00349292	1.33952e-05	2.33643e-07	9.06208e-07	0.0141033	1.77193e-05	4.98083e-07		bcin_chr_11:440,386..441,683(+)
1024	Bcin11g01310	Vir	9	0.292028	-0.0143677	0.0571346	0.0730432		5.65817e-07	0.00148738	1.28222e-05	1.6124e-07	1.65477e-06	0.0256872	3.17076e-05	1.53311e-06		bcin_chr_11:449,537..451,290(+)		Alpha/beta hydrolase fold-1;Peptidase S33 tripeptidyl aminopeptidase-like, C-terminal;Alpha/Beta hydrolase fold	Alpha/beta hydrolase fold-1;Peptidase S33 tripeptidyl aminopeptidase-like, C-terminal		Alpha/Beta hydrolase fold			hydrolase activity
1025	Bcin11g01470	Vir	9	0.244492	0.00690233	0.0417694	-0.0248036		1.51437e-07	0.00194304	1.37444e-05	2.23226e-07	-4.61223e-07	0.00318695	2.1076e-05	1.04826e-06		bcin_chr_11:498,698..499,400(-)
1026	Bcin11g01710	Vir	61	0.360697	-0.00736051	0.222768	0.0166714		-4.44027e-07	-0.00331602	1.21115e-05	1.38384e-07	5.25485e-07	0.00675014	1.50647e-05	3.95458e-07		bcin_chr_11:549,835..552,201(-)		DNA2/NAM7 helicase, AAA domain	DNA2/NAM7 helicase, AAA domain
1027	Bcin11g01730	Vir	5	0.35347	0.00462421	0.245787	-0.0149358		-1.29819e-07	-0.000237572	1.28e-05	1.49845e-07	8.06254e-08	-0.00164426	1.58737e-05	3.4449e-07		bcin_chr_11:560,898..562,010(+)
1028	Bcin11g01810	Vir	9	0.585494	0.00612279	0.114876	-0.0218172		-5.10075e-07	-0.00157919	1.19667e-05	1.60736e-07	-6.68677e-08	0.00392376	1.70877e-05	6.24178e-07		bcin_chr_11:591,888..592,938(+)		Short-chain dehydrogenase/reductase SDR;Short-chain dehydrogenase/reductase, conserved site;NAD(P)-binding domain superfamily	Short-chain dehydrogenase/reductase SDR		NAD(P)-binding domain superfamily			oxidoreductase activity		1.1.1.100 (3-oxoacyl-[acyl-carrier-protein] reductase)
1029	Bcin11g01950	Vir	53	0.334533	-0.00181688	0.0559466	0.0229264		6.66407e-09	-0.000118132	1.04208e-05	1.1076e-07	9.32512e-07	0.00902038	1.56187e-05	3.83729e-07		bcin_chr_11:637,561..641,196(+)
1030	Bcin11g02030	Vir	17	0.155671	-0.0285325	0.0600878	0.0832315		-7.5785e-07	-0.00589242	1.19294e-05	1.02088e-07	1.4305e-06	0.0142625	1.5969e-05	3.78225e-07		bcin_chr_11:674,209..674,942(+)		Cardiolipin synthase N-terminal	Cardiolipin synthase N-terminal				integral component of membrane;plasma membrane
1031	Bcin11g02470	Vir	64	0.528178	0.00164111	0.179399	-0.0141077		-3.34929e-07	-0.00181241	1.02625e-05	9.13277e-08	-2.05705e-07	-0.000939786	1.49704e-05	3.31001e-07		bcin_chr_11:843,109..844,243(-)
1032	Bcin11g02500	Vir	5	0.263843	-0.0233964	0.177037	0.0689387		-5.47361e-07	-0.00455773	1.152e-05	1.04788e-07	1.99198e-06	0.0225884	2.46526e-05	8.4052e-07		bcin_chr_11:858,674..859,813(-)	Bcrex2	Ribonuclease H-like superfamily;Exonuclease, RNase T/DNA polymerase III;Oligoribonuclease	Exonuclease, RNase T/DNA polymerase III	Exonuclease, RNase T/DNA polymerase III	Ribonuclease H-like superfamily			3'-5'-exoribonuclease activity;nucleic acid binding		3.1.-.- (Acting on ester bonds.)
1033	Bcin11g02520	Vir	17	0.097593	-0.029043	0.000483588	0.0924856		-2.76146e-07	-0.00380845	1.05412e-05	1.18675e-07	1.47787e-06	0.0215529	1.72384e-05	5.23703e-07		bcin_chr_11:865,763..867,852(-)
1034	Bcin11g03340	Vir	3	0.142347	-0.0289253	2.74474e-05	0.107162		-6.28495e-09	-0.000711111	1.19667e-05	6.74951e-08	1.73367e-06	0.0202233	1.6386e-05	4.23685e-07		bcin_chr_11:1,143,406..1,144,177(-)
1035	Bcin11g04380	Vir	5	0.0274594	-0.043292	1.11603e-05	0.125619		-1.32655e-06	-0.0104815	1.49e-05	2.52181e-07	2.57748e-06	0.0420814	3.97895e-05	2.13581e-06		bcin_chr_11:1,622,376..1,623,714(+)		Protein of unknown function DUF3425	Protein of unknown function DUF3425
1036	Bcin11g05010	Spe	9	0.220006	0.0157806	0.111467	-0.012571		1.27734e-06	0.00894241	2.20667e-05	7.53987e-07	-4.26366e-07	-0.00357911	1.47135e-05	3.50865e-07		bcin_chr_11:1,802,488..1,804,708(+)		Phosphatidic acid phosphatase type 2/haloperoxidase;Phosphatidic acid phosphatase type 2/haloperoxidase superfamily;Phospholipid phosphatase	Phosphatidic acid phosphatase type 2/haloperoxidase		Phosphatidic acid phosphatase type 2/haloperoxidase superfamily		integral component of membrane	phosphatidate phosphatase activity	phospholipid metabolic process
1037	Bcin11g05090	Vir	12	0.0973434	0.00095802	0.122661	0.00277234		5.84294e-07	0.00357278	3.23417e-05	1.02098e-06	-3.54125e-07	0.000807348	3.44825e-05	1.40254e-06		bcin_chr_11:1,820,996..1,822,720(+)		Zinc finger C2H2-type;Zinc finger C2H2 superfamily		Zinc finger C2H2-type	Zinc finger C2H2 superfamily
1038	Bcin11g05100	Spe	23	0.264251	0.00140638	0.191305	-0.0216425		-4.43782e-07	-0.00281428	2.37652e-05	7.01151e-07	-1.12688e-07	-0.000537729	2.11213e-05	6.54472e-07		bcin_chr_11:1,825,598..1,827,107(-)								metal ion binding
1039	Bcin11g05110	Vir	9	0.0434544	-0.00350367	0.249122	-0.00272017		-6.10838e-07	-0.00529648	3.84111e-05	1.32027e-06	5.63635e-07	0.00668957	3.63041e-05	1.6359e-06		bcin_chr_11:1,827,513..1,829,625(-)	Bcpac2	CAP Gly-rich domain;CAP Gly-rich domain superfamily	CAP Gly-rich domain	CAP Gly-rich domain	CAP Gly-rich domain superfamily		microtubule	protein binding		3.1.1.3 (Triacylglycerol lipase)
1040	Bcin11g05140	Vir	5	0.110828	-0.0283381	0.245022	0.0573153		-1.66966e-06	-0.0121496	1.682e-05	3.46965e-07	2.29311e-06	0.026118	5.01684e-05	2.42432e-06		bcin_chr_11:1,834,971..1,836,198(-)		Centromere protein H, C-terminal	Centromere protein H, C-terminal				condensed chromosome kinetochore;kinetochore;nucleus		kinetochore assembly
1041	Bcin11g05170	Vir	3	0.0171692	-0.0109698	1.01708e-05	0.0399186		1.16279e-06	0.00651766	1.23333e-05	1.53109e-07	-8.89482e-07	-0.00384952	3.07368e-05	1.16107e-06		bcin_chr_11:1,844,883..1,846,463(-)		JAB1/MPN/MOV34 metalloenzyme domain;Eukaryotic translation initiation factor 3 subunit H	JAB1/MPN/MOV34 metalloenzyme domain	JAB1/MPN/MOV34 metalloenzyme domain			cytoplasm;eukaryotic 43S preinitiation complex;eukaryotic 48S preinitiation complex;eukaryotic translation initiation factor 3 complex	isopeptidase activity;metallopeptidase activity;protein binding;translation initiation factor activity	formation of cytoplasmic translation initiation complex
1042	Bcin11g05250	Spe	27	0.396481	0.0100878	0.131517	0.0065746		1.86924e-06	0.0147126	2.45667e-05	7.71368e-07	-9.96294e-07	-0.00739135	1.50721e-05	3.33442e-07		bcin_chr_11:1,872,256..1,875,747(+)
1043	Bcin11g05380	Spe	14	0.0106346	0.0313229	0.117415	-0.0151177		2.78778e-06	0.023101	3.86786e-05	1.28561e-06	6.10337e-08	0.000785789	1.01955e-05	1.08891e-07		bcin_chr_11:1,914,140..1,915,055(-)
1044	Bcin11g05400	Spe	21	0.368463	0.0158988	0.142094	-0.00608153		1.06564e-06	0.00876876	1.92095e-05	5.70333e-07	-2.12581e-07	-0.00246577	9.61905e-06	1.08705e-07		bcin_chr_11:1,917,404..1,918,885(+)		S-adenosyl-L-methionine-dependent methyltransferase;Methyltransferase domain 25	Methyltransferase domain 25		S-adenosyl-L-methionine-dependent methyltransferase					1.14.13.- (With NADH or NADPH as one donor, and incorporation of one atom of oxygen.)
1045	Bcin11g05470	Spe	11	0.0354298	-0.0282384	0.00345636	0.0847423		-4.89061e-07	-0.00535338	2.15545e-05	6.37996e-07	1.29239e-06	0.0148405	1.29665e-05	2.37958e-07		bcin_chr_11:1,949,461..1,950,808(+)
[truncated: 447 more rows]
